1 **Sex-specific transcript diversity is regulated by a maternal transcription factor in early**  
2 ***Drosophila* embryos**

3 Mukulika Ray<sup>#Ω</sup>, Ashley Mae Conard<sup>ψΩ</sup>, Jennifer Urban<sup>ξ</sup>, Joseph Aguilera<sup>#</sup>, Annie Huang<sup>#</sup>,  
4 Pranav Mahableshwarkar<sup>ψ,#</sup>, Smriti Vaidyanathan<sup>ψ,#</sup>, Erica Larschan<sup>#\*</sup>

5 \* Corresponding Author

6 <sup>Ω</sup> contributed equally

7 <sup>#</sup> MCB department, Brown University, Providence, RI, USA,

8 <sup>ψ</sup> CCMB department, Brown University, Providence, RI, USA

9 <sup>ξ</sup> Biology department, Johns Hopkins University, Baltimore, Maryland, USA

10

11

12 **Abstract**

13

14 Co-transcriptional splicing coordinates the processes of transcription and splicing and is driven by  
15 transcription factors (TFs) and diverse RNA-binding proteins (RBPs). Yet the mechanisms by  
16 which specific TFs and RBPs function together in context-specific ways to drive precise co-  
17 transcriptional splicing at each of thousands of genomic loci remains unknown. Therefore, we  
18 have used sex-specific splicing in *Drosophila* as a model to understand how the function of TFs  
19 and RBPs is coordinated to transcribe and process specific RNA transcripts at the correct genomic  
20 locations. We show widespread sex-specific transcript diversity occurs much earlier than  
21 previously thought and present a new pipeline called time2splice to quantify splicing changes over  
22 time. We define several mechanisms by which the essential and functionally-conserved CLAMP  
23 TF functions with specific RBPs to precisely regulate co-transcriptional splicing: 1) CLAMP links  
24 the DNA of gene bodies of sex-specifically spliced genes directly to the RNA of target genes and  
25 physically interacts with snRNA and protein components of the splicing machinery; 2) In males,  
26 CLAMP regulates the distribution of the highly conserved RBP **Maleless** (MLE) (RNA Helicase  
27 A) to prevent aberrant sex-specific splicing; 3) In females, CLAMP modulates alternative splicing  
28 by directly binding to target DNA and RNA and indirectly through regulating the splicing of *sex*  
29 *lethal*, the master regulator of sex determination. Overall, we provide new insight into how TFs  
30 function specifically with RBPs to drive alternative splicing.

31

32

33

## 34 **Introduction**

35

36 One of the greatest challenges in modern biology is to understand how transcription is coupled  
37 with splicing to drive development and differentiation. Gene expression is a multistep process,  
38 initiated when RNA transcripts are synthesized from DNA templates, followed at many genes by  
39 **alternative splicing (AS)**, the selective inclusion or exclusion of introns and exons. Immediately  
40 after **transcription factors (TFs)** initiate transcription, multiple **RNA Binding Proteins (RBP)**s bind  
41 to nascent RNA and remove introns to form the mature mRNA, ready for export and translation<sup>1-</sup>  
42 <sup>3</sup>. Thus, both TFs and RBPs drive transcriptome diversity through regulating transcript levels and  
43 isoforms. These processes are likely coupled, as much prior work<sup>2,4-6</sup> and recent cryo-EM  
44 structures<sup>7</sup> reveal a close association between TFs and splicing complexes. Furthermore, many  
45 RBPs that are part of splicing complexes, regulate both transcription and splicing<sup>8-12</sup>. However, it  
46 is not yet understood how TFs and RBPs function together to coordinate transcription and  
47 alternative splicing such that specific isoforms are transcribed and processed at the correct genomic  
48 locations. Therefore, we have studied the coordination of transcription and alternative splicing  
49 during the establishment of sexual dimorphism in *Drosophila melanogaster* as a model to  
50 understand this process.

51

52 A key to understanding how alternative splicing is established as sexual dimorphism initiates lies  
53 in the events that shape the initial few hours of an organism's existence. During early development,  
54 TFs and RBPs deposited by the mother into the embryo shape early embryonic milestones across  
55 metazoans<sup>13,14</sup>. Initially, cell number increases, followed by differentiation into specific cell types,  
56 which is driven by transcription and co-transcriptional splicing<sup>3,15</sup>. However, the mechanisms by  
57 which maternally deposited TFs and RBPs function together to drive the process of co-  
58 transcriptional splicing in a sex-specific manner remains poorly understood.

59

60 The *Drosophila* embryo is an excellent tool to study the role of maternally deposited proteins and  
61 RNA in early development as it is easy to perform genetic manipulations to remove maternal  
62 factors to define how they regulate splicing and transcription. Also, embryos can be sexed before  
63 zygotic genome activation due to our recent application of a meiotic drive system<sup>16</sup>. During  
64 *Drosophila* embryogenesis, zygotic genome activation (ZGA) occurs shortly after the first two

65 hours of development. Concurrently, maternal transcripts gradually decrease in abundance, and  
66 zygotic transcription increases, a process called the MZT (**M**aternal to **Z**ygotic **T**ransition). ZGA  
67 starts approximately 80 min after egg laying and most maternal transcripts are degraded by 180  
68 min after egg laying<sup>17</sup>. Even at these early stages of development, AS generates multiple transcript  
69 isoforms resulting in transcript diversity. Although the earliest genes transcribed from the zygotic  
70 genome are mainly intron-less, approximately 30% of early zygotic transcripts do have  
71 introns<sup>18,19</sup>. Furthermore, genes involved in sex determination do have introns and use AS to drive  
72 male versus female-specific development<sup>20</sup>. Hence, during early embryonic development, AS is  
73 important for shaping cell and tissue-specific transcriptomes and essential for sexual  
74 differentiation. However, it was not known whether maternally-deposited factors initiate sex-  
75 specific AS early in development.

76

77 TFs have been hypothesized to facilitate context-specific AS, but little is known about how specific  
78 transcription factors mediate this link. Several lines of evidence led us to hypothesize that the  
79 maternally-deposited TF CLAMP (**C**hromatin-**l**inked **a**dapter for **M**SL **p**roteins) is a good  
80 candidate with which to study the mechanisms by which TFs and RBPs function together to drive  
81 sex-specific co-transcriptional AS for several reasons: 1) CLAMP directly binds to DNA at both  
82 promoters and intronic sites<sup>21,22</sup> and mass spectrometry identified association with 33 RBPs on  
83 chromatin, 6 of which regulate AS<sup>23</sup>; 2) CLAMP is bound to approximately equal numbers of  
84 intronic regions and promoter regions<sup>24</sup>; 3) Many CLAMP binding sites evolved from intronic  
85 polypyrimidine tracts<sup>25</sup>; 4) Maternal CLAMP is essential for viability in males and females<sup>22</sup>.  
86 Therefore, we hypothesized that CLAMP is a maternally deposited TF that selectively interacts  
87 with specific RBPs to regulate co-transcriptional AS in a context-specific manner.

88

89 We combined diverse genomic, genetic, and computational approaches to define new mechanisms  
90 that control the context-specificity of co-transcriptional splicing using sex-specific splicing as a  
91 model. First, we determined all of the sex-specifically spliced isoforms early during development  
92 genome-wide which has never been performed in any species. Next, we identified the following  
93 mechanisms: 1) In both males and females, CLAMP acts as a linker between the DNA of gene  
94 bodies and the RNA of a subset of its targeted sex-specifically spliced genes; 2) CLAMP sex-  
95 specifically interacts with spliceosomal RNAs and RBPs; 3) In males specifically, CLAMP

96 regulates the distribution of the spliceosome component MLE (**Maleless**) on chromatin to prevent  
97 aberrant sex-specific splicing; 4) In females specifically, CLAMP functions upstream of the *sxl*  
98 master regulator of sex determination to directly regulate splicing and directly and indirectly  
99 regulate the AS of different subsets of downstream *sxl* targets. Thus, we conclude that we have  
100 identified new mechanisms by which a TF functions context-specifically with RBPs to regulate  
101 alternative splicing that drives a key developmental decision.

102

## 103 **Results**

104

### 105 **1. Sex-specific alternative splicing is present at the earliest stages of *Drosophila* development**

106

107 Before we could define the function of TFs and RBPs in regulating sex-specific splicing, it was  
108 critical to define when sex-specific splicing begins during development. Therefore, we analyzed  
109 RNA-sequencing data that we generated from male and female embryos at two-time points: 0-2  
110 hours (pre-MZT) and 2-4 hours (post-MZT)<sup>16</sup> (#GSE102922). We were able to produce male or  
111 female embryos using a meiotic drive system that produces sperm with either only X or only Y  
112 chromosomes<sup>16</sup>. Next, we measured the amount of AS in these samples using a new pipeline that  
113 we developed for this analysis and made publicly available called time2Splice  
114 (<https://github.com/ashleymaeconard/time2splice>). Time2Splice implements the commonly used  
115 SUPPA2 algorithm<sup>26</sup> to identify splice variants and provides additional modules to integrate time,  
116 sex, and chromatin localization data (**Materials and Methods**) (**Fig S1**). SUPPA2 measures the  
117 PSI (**P**ercent **S**pliced **I**n) for each exon and calculates the differential alternative splicing between  
118 samples, reported as  $\Delta$ PSI<sup>26</sup>. Therefore, SUPPA2 is specifically designed to identify alternative  
119 splicing events.

120

121 From our RNA-seq data, we used Time2Splice to analyze 66,927 exons associated with 17,558  
122 genes and classified the AS events into one of seven classes (diagrammed in **Fig 1A**). We found  
123 that 16-18% of the exons are alternatively spliced in early embryos (**Fig1B**) and fall into one of  
124 the seven classes (**Fig 1C-D**). Of these seven classes, AF (**A**lternative **F**irst Exon) is the most  
125 common type, constituting almost one-fourth of total AS (~24-26%), and AL (**A**lternative **L**ast  
126 Exon) is the least common type (~3%). The AS transcript distribution across categories was similar

127 between the two time points and the two sexes (**Fig 1B-D**). Next, we asked which type of AS is  
128 most affected by depleting CLAMP. The overall distribution of transcripts into the seven AS  
129 classes remains mostly unaffected in the absence of maternal CLAMP. However, at the 0-2 Hr  
130 (pre-MZT) stage, loss of maternal CLAMP results in a more substantial decrease in **Mutually**  
131 **Exclusive Exon (MXE)** splicing in both males and females compared with all of the other types  
132 of splicing (**males**: p-value < 3.21e-21; **females**: p-value < 6.26e-87 Chi-squared test) (**Fig 1D**).  
133 At the 2-4 Hr/post-MZT stage, only male embryos have a significant percentage of MXE splicing  
134 affected in the absence of maternal CLAMP (p-value < 1.95e-137 Chi-squared test) (**Fig 1D**).  
135 Therefore, CLAMP regulates AS and has a stronger effect on MXE splicing than other types of  
136 splicing.

137  
138 During MXE splicing, one isoform of the transcript retains one of the alternative exons and  
139 excludes another exon, which is retained by another isoform (schematic in **Fig 1A**). Interestingly,  
140 MXE alternative splicing occurs in many transcripts that encode components of the sex  
141 determination pathway<sup>12</sup>. Furthermore, CLAMP has a sex-specific role in dosage  
142 compensation<sup>27,28</sup>. Therefore, we defined sex-specific splicing events in the early embryo for the  
143 first time. We identified sex-specific splicing events in 0-2 Hr embryos (pre-MZT) (**Fig S2A**,  
144 **N=92**) and in 2-4 Hr embryos (post-MZT) (**Fig S2B**, **N=138**) and categorized them as known sex-  
145 specifically spliced (**known SSS**) events. Overall, we determined that sex-specific AS occurs  
146 earlier in development than ever shown previously in any species.

## 147 148 **2. Maternal CLAMP regulates sex-specific alternative splicing in early *Drosophila* embryos**

149  
150 We hypothesized that CLAMP regulates sex-specific AS in early embryos for the following  
151 reasons: 1) CLAMP is a maternally deposited pioneer transcription factor with sex-specific  
152 functions that is enriched at intronic regions in addition to promoters<sup>24,29</sup>; 2) Proteomic data  
153 identified a physical association between spliceosome components and CLAMP<sup>23</sup>; and 3) CLAMP  
154 binding sites evolved from polypyrimidine tracts that regulate splicing<sup>25</sup>. We tested our hypothesis  
155 in early staged and sexed embryos by measuring differences in splicing in RNA-seq data generated  
156 from male and female 0-2 Hr/pre-MZT and 2-4 Hr/post-MZT embryos with and without maternal  
157 CLAMP<sup>16</sup>. The maternal triple driver GAL4 (*MTD-GAL4*) was used to drive *UAS-*

158 *CLAMP* RNAi[*val22*] which strongly reduces maternal CLAMP levels as validated by qPCR and  
159 Western blot conducted in parallel with mRNA-seq data collection <sup>16</sup>.

160

161 First, we asked whether CLAMP alters AS and we found 200-400 transcripts at which AS is  
162 regulated by CLAMP depending on the time point and sex (**Fig S2C-F** and **Fig 2A, B**). To  
163 determine whether CLAMP-dependent AS events are enriched for sex-specific splicing (SSS)  
164 events, we first identified all of the CLAMP dependent AS events in female (**Fig S2C, D**) and in  
165 male (**Fig S2E, F**) 0-2 Hr and 2-4 Hr embryos (**Materials and Methods**). We measured  
166 alternative splicing using an exon-centric approach to quantify individual splice junctions by  
167 measuring PSI (**Percent Spliced In**) for a particular exon using the established SUPPA algorithm  
168 within the time2splice pipeline<sup>26</sup>. Exon inclusion is represented as positive PSI, and exclusion  
169 events are defined as negative PSI (equation in **Materials and Methods**). By comparing the  
170 CLAMP-dependent AS events in females and males, we identified CLAMP-dependent sex-  
171 specific splicing events in female and male in 0-2 Hr and 2-4 Hr embryos (**Fig 2A, B** and  
172 **Supplementary Table S1**).

173

174 When we measured the percentage of total alternatively spliced and sex-specifically spliced  
175 transcripts that are CLAMP-dependent in males and females at both pre- and post-MZT stages, we  
176 found that while only 2-3% of total AS exons are CLAMP-dependent, ~30-60% of sex-specifically  
177 spliced exons are CLAMP-dependent (**Fig 2A**). Therefore, the function of CLAMP in AS is highly  
178 enriched at sex-specific transcripts. We then divided all CLAMP-dependent AS events into two  
179 categories: 1) sex-specifically spliced (SSS) events; and 2) non-sex specifically spliced (non-SSS)  
180 events (**Fig 2B**). We then subdivided the CLAMP-dependent SSS events into the following  
181 subclasses: 1) **known** SSS events, female-specific and male-specific splicing events at 0-2 Hr and  
182 2-4 Hr embryo stages that are CLAMP dependent ( $p < 0.05$ ) (**Fig 2A-B**); 2) **new** SSS events,  
183 splicing events that occur only in the absence of CLAMP and not in control samples (**Fig 2B**),  
184 which are aberrant splicing events suppressed by CLAMP. By calculating  $\Delta$ PSI in these  
185 subclasses, we identified widespread CLAMP-dependent sex-specific splicing, especially in  
186 female embryos (**Fig 2B**). Interestingly, the majority of CLAMP-dependent SSS events are **new**  
187 aberrant SSS events that did not occur in the presence of maternal CLAMP (~70%) (**Fig**  
188 **2C**). Furthermore, 85% of genes at which CLAMP regulates sex-specific splicing, it does not

189 regulate transcription as determined by comparing our differentially spliced genes with our  
190 published differential gene expression analysis<sup>16</sup>. Therefore, the function of CLAMP in regulating  
191 sex-specific splicing largely does not overlap with its regulation of transcription.

192

193 To define the magnitude of the effect of CLAMP on splicing, we compared the  $\Delta$ PSI for known  
194 and new SSS events between female and male samples (**Fig S3**). We found that although more  
195 splicing events/transcripts show CLAMP-dependent splicing in females (~150-250) than males  
196 (~100) (**Fig 2B and Supplementary Table S1**), post-MZT, CLAMP-dependent exon inclusion  
197 was significantly enriched in male new SSS transcripts compared to their female-specific  
198 counterparts (**Fig S3**). Thus, in the absence of CLAMP, new aberrant sex-specifically spliced  
199 isoforms are generated suggesting that CLAMP normally inhibits aberrant sex-specific splicing  
200 events.

201

202 During the first few hours of their development, *Drosophila* embryos have predominantly maternal  
203 transcripts. Therefore, we asked whether CLAMP-dependent female and male specifically-spliced  
204 genes are maternally deposited or zygotically transcribed. We compared our list of CLAMP-  
205 dependent sex-specifically spliced genes with known maternally expressed genes that are  
206 consistent across multiple previous studies<sup>30,31</sup>. We found very low levels of overlap with  
207 maternally deposited transcripts (**Fig 2D**) even in the 0-2 Hr embryo stage, consistent with ZGA  
208 starting at approximately 80 minutes after egg laying<sup>17</sup>. Therefore, most of the sex-specifically  
209 spliced genes we observed are likely to be zygotic transcripts, consistent with the function of  
210 CLAMP as a pioneer TF acting in the early embryo<sup>22</sup>.

211

212 To understand the classes of genes whose splicing is CLAMP-dependent, we performed Gene  
213 Ontology (GO) analysis. Our analysis showed that pre-MZT (0-2 Hrs), female-specifically spliced  
214 genes are primarily TFs and factors that regulate splicing (**Fig 2E**). Therefore, in females CLAMP  
215 alters the splicing of genes that can regulate the transcription and splicing of other genes that  
216 amplify its regulatory role. In contrast, the male specifically-spliced pre-MZT genes are not  
217 enriched for any specific biological function or process, likely due to the small number of genes  
218 in the gene list. At the post-MZT stage in both sexes, CLAMP regulates the splicing of genes that

219 drive development including organogenesis, morphogenesis, cell proliferation, signaling, and  
220 neurogenesis (**Fig 2E**).

221

222 In order to validate our genomic splicing analysis from time2splice for individual target genes  
223 (**Fig. 2E**), we randomly selected eight genes at which we determined CLAMP regulates splicing  
224 using qRT-PCR or RT-PCR (**Fig. S4**). Our RT-PCR results indicate that we are able to validate  
225 the function of CLAMP in regulating splicing of genes which we identified genomically with  
226 time2splice (**Fig. S4**). We summarized the functions of the validated target genes at which splicing  
227 is regulated by CLAMP (**Supplementary Table S2**). *iab4*, one of the target genes that we  
228 validated, has known functional links to CLAMP suggesting that we have identified relevant target  
229 genes<sup>23,29,32</sup>. Furthermore, many of the validated target genes that are sex-specifically spliced by  
230 CLAMP are themselves involved in splicing and chromatin regulation including those with known  
231 isoforms that specifically regulate alternative splicing such as *fus*, *pep*, *sc35* (**Supplementary**  
232 **Table S2**). In summary, maternal CLAMP functions early in development to prevent the aberrant  
233 sex-specific splicing of the majority of sex-specifically spliced zygotic transcripts including many  
234 that encode regulators of alternative splicing.

235

### 236 **3. Zygotic CLAMP regulates sex-specific alternative splicing during *Drosophila*** 237 **development**

238

239 Next, we asked whether in addition to maternal CLAMP, zygotic CLAMP regulates sex-specific  
240 splicing. Therefore, we analyzed total RNA-seq data from wild type control and *clamp* null mutant  
241 (*clamp*<sup>2</sup>)<sup>27</sup> third instar larvae (L3) and identified CLAMP dependent sex-specific splicing events  
242 (**Supplementary Table S3**). Out of a total of 189 and 211 CLAMP-dependent alternative splicing  
243 events in female and male L3 larvae, we identified 139/189 (73.5%) and 161/211 (76.3%) sex-  
244 specific splicing events (**Supplementary Table S3, Sheet1, Column H-J**). Because CLAMP  
245 regulates transcription in addition to splicing, we compared transcription and splicing target genes  
246 to each other and found that 60% of sex-specifically spliced genes are also regulated at the level  
247 of transcription in larvae in contrast to 15% of sex-specifically spliced genes in embryos  
248 (**Supplementary Table S4, Fig S5A, S5B**). This shows that CLAMP has a dual role in  
249 transcription and splicing that differs at different developmental stages.



250

251 Zygotic CLAMP is also present in male and female cell lines derived from embryos. Such cell  
252 lines have frequently been used as model systems due to the ability to easily obtain sufficient  
253 material for low yield genomic assays like CHIP-seq<sup>33</sup>, MNase-seq<sup>21,34</sup> and iCLIP (see below).  
254 Furthermore, S2 and Kc cells are embryonically-derived established models for male and female  
255 cells, respectively, that differ in their sex chromosome complement<sup>35,36</sup> and have been studied for  
256 decades in the context of dosage compensation<sup>37-39</sup>. Therefore, we also defined CLAMP-dependent  
257 splicing events by performing *clamp* RNAi in Kc and S2 cells. We first quantified all splicing  
258 events that differ between control populations of Kc and S2 cells using time2splice  
259 (**Supplementary Table S5, Fig S5C**). Then we identified CLAMP-dependent splicing events in  
260 cell lines and found that these events are almost entirely sex-specific: 1) 45/46 CLAMP-dependent  
261 splicing events are female sex-specific in Kc cells and 112/113 CLAMP-dependent splicing events  
262 are male sex-specific in S2 cells (**Supplementary Table S5, Sheet2, Column F-H**).

263

264 Interestingly, almost all CLAMP-dependent spliced genes were regulated by CLAMP at the level  
265 of splicing and not transcription and many more genes are regulated at the level of splicing than  
266 transcription (**Fig S5D**). While 100 genes (112 splicing events) show CLAMP-dependent splicing  
267 in S2 cells, only 12 genes exhibit CLAMP-dependent differential gene expression. Similarly, in  
268 Kc cells, 42 genes (45 splicing events) show CLAMP-dependent splicing and only 18 genes show  
269 CLAMP-dependent expression (**Fig S5D, E**). Overall, fewer genes are regulated by CLAMP in  
270 cell lines compared with embryos likely because cell lines remain alive in the absence of CLAMP<sup>40</sup>  
271 while embryos depleted for maternal CLAMP do not survive past zygotic genome activation and  
272 L3 null larvae do not undergo pupation<sup>29</sup>. In summary, zygotic CLAMP regulates splicing in larvae  
273 and embryonically-derived cell lines and the relative influence of CLAMP on splicing compared  
274 with transcription at target genes differs across in different cellular contexts.

275

### 276 **3. CLAMP is highly enriched along gene bodies of sex-specifically spliced genes**

277

278 What is the mechanism by which CLAMP regulates sex-specific splicing? If CLAMP directly  
279 regulates sex-specific splicing, we hypothesized that it would directly bind to DNA near the intron-  
280 exon boundaries of the genes where it regulates splicing. Therefore, we defined the binding pattern

281 of CLAMP at the CLAMP-dependent female and male sex-specifically spliced genes in sexed  
282 embryos using CLAMP ChIP-seq data (#GSE133637). We found that 43.8% percent of all  
283 CLAMP-dependent sex-specifically spliced genes are bound by CLAMP across sexes and time  
284 points: 21.9% in 0-2 Hr female embryos, 8.2% in 0-2 Hr male embryos, 65.2% in 2-4 Hr female  
285 embryos and 59.4% in 2-4 Hr male embryos (**Supplementary Table S6**). The increase in  
286 percentage of genes bound by CLAMP in 2-4 Hr embryos compared with 0-2 Hr embryos is  
287 consistent with the known increased number and occupancy level of CLAMP binding sites at the  
288 later time point<sup>29</sup>. We also generated average profiles for CLAMP occupancy at genes where  
289 CLAMP regulates females (**red line**) and males (**blue lines**) sex-specific splicing in 0-2 Hr (pre-  
290 MZT) (**Fig 3A, B**) and 2-4 Hr (post-MZT) (**Fig 3C, D**) along both pre- and post-MZT time points  
291 in females (**Fig 3A, C**) and males (**Fig 3B, D**). We found that CLAMP occupies the gene bodies  
292 of many sex-specifically spliced genes that require CLAMP for their splicing. Overall, these data  
293 are consistent with a direct role for CLAMP in regulating splicing of sex-specifically spliced genes  
294 at up to 65% of its target genes.

295  
296 Next, we compared the average CLAMP binding pattern at sex-specifically spliced genes (**Fig 3A-**  
297 **D**) to the CLAMP binding pattern at genes whose transcription but not splicing is both sex-biased  
298 and dependent on CLAMP (**Fig 3E-H**). In contrast to sex-specifically spliced genes where  
299 CLAMP occupancy is present over gene bodies, at genes that are expressed but not spliced in a  
300 CLAMP-dependent and sex-biased manner, CLAMP is enriched at the TSS and TES (area within  
301 the rectangular box demarcated by TSS and TES in **Fig 3A-H**). Furthermore, CLAMP binding is  
302 also modestly enriched at the TSS of female-biased expressed genes in females, consistent with  
303 enhanced CLAMP occupancy at the TSS of expressed genes<sup>40</sup>. As a control, we used a random  
304 set of active genes that are not regulated by CLAMP (**green lines in Fig 3A-H**) and we observed  
305 lower occupancy than at CLAMP-dependent genes. Overall, we found preferential binding of  
306 CLAMP along the gene bodies of genes that have CLAMP-dependent splicing in both females and  
307 males in contrast to TSS and TES binding at genes where expression but not splicing requires  
308 CLAMP.

309  
310 To determine whether the binding of CLAMP to gene bodies occurs close to splice junctions, we  
311 measured the distance between CLAMP peaks and the nearest splice junction (**Fig S6**). We found

312 that CLAMP peaks are most frequently within 200-400bp of either the start or the end of a splice  
313 junction, especially in sex-specifically spliced genes. The resolution of these measurements is  
314 limited by sonication and therefore it is possible that binding occurs even closer to splice junctions.  
315 We also found that CLAMP binds to chromatin closer to splice junctions at CLAMP-dependent  
316 sex-specifically spliced genes compared to genes with CLAMP-dependent sex-biased  
317 transcription in 2-4 hr female embryo samples which have the most target genes and CLAMP  
318 binding events which improves statistical significance. The results were similar for all CLAMP  
319 peaks (**Fig S6C**) compared to peaks only present in introns (**Fig S6G**). Together these data support  
320 a direct role for CLAMP in modulating co-transcriptional RNA processing at a subset of its targets  
321 that we hypothesized is due to direct contact with target RNA transcripts and altering the  
322 recruitment of spliceosome components.

323

#### 324 **4. CLAMP binds to RNA on chromatin at a subset of sex-specifically spliced genes and** 325 **interacts with the mature spliceosome complex sex-specifically**

326

327 To test our hypothesis that CLAMP directly regulates co-transcriptional RNA splicing by  
328 contacting both the DNA and RNA of sex-specifically spliced genes and altering spliceosome  
329 recruitment, we asked whether CLAMP directly binds to RNA with fractionation iCLIP<sup>41,42</sup>  
330 (individual-nucleotide resolution CrossLinking and ImmunoPrecipitation). We used cell lines for  
331 the iCLIP assay due to the large amount of input material required that could not be obtained from  
332 our low yield meiotic drive embryo system. Although CLAMP does not have a canonical RNA  
333 recognition motif (**RRM**), it has a prion-like intrinsically disordered domain which mediates RNA  
334 interaction in many RNA binding proteins<sup>43,44</sup>. Using single nucleotide resolution UV crosslinked  
335 immunoprecipitation (iCLIP) which defines direct protein-RNA interactions<sup>41</sup>, we determined that  
336 CLAMP binds directly to hundreds of RNAs and most targets are sex-specific with only 15%  
337 (124/816) of the target RNAs shared between male and female cell lines (**Fig 4A, Supplementary**  
338 **Table S7**). Also, we predicted unique CLAMP RNA binding motifs in male and female cells  
339 suggesting interaction with cofactors may change the ability of CLAMP to interact with RNA (**Fig**  
340 **S4A**).

341

342 We identified CLAMP RNA binding targets separately in chromatin and nucleoplasmic cellular  
343 fractions to test whether CLAMP is binding to both DNA and RNA of target genes on chromatin.  
344 Also, identifying CLAMP RNA targets on chromatin allowed us to determine whether CLAMP is  
345 directly involved in co-transcriptional RNA processing at a subset of its targets. Interestingly, most  
346 CLAMP interaction with RNA occurs on chromatin (91.9%, 601/654 of male RNA targets; 58.4%,  
347 167/286 of female RNA targets) (**Fig S4A**). Even though iCLIP was conducted in S2 and Kc  
348 embryonic cell lines, we still found 47/388 (**Column I, Supplementary Table S7**) target genes  
349 where CLAMP regulates sex-specific splicing in embryos and interacts with RNA by iCLIP in  
350 embryonic cell lines. Therefore, CLAMP sex-specifically and directly interacts with RNA targets  
351 on chromatin including the RNA encoded by a subset of the genes at which it regulates sex-specific  
352 splicing.

353

354 Next, we determined the overlap between genes whose splicing is regulated by CLAMP in larvae  
355 and cell lines and our cell line iCLIP data. In L3 larvae, 16 of the 124-female sex-specific and  
356 140-male sex-specifically spliced CLAMP-dependent genes are direct CLAMP RNA targets  
357 identified from cell line iCLIP data (**Supplementary Table S3, Column I, Sheet 2 and 3**),  
358 including key genes involved in sex-specific splicing: 1) the master sex-determination regulator  
359 and splicing factor *sxl*; 2) *hrp36*, an RBP that regulates alternative splicing; 3) *mrj*, which interacts  
360 with *hrp38* that regulates alternative splicing. The *hrp36* and *hrp38* genes are orthologous of each  
361 other and the well-studied human hnRNPA/B family of splicing factors<sup>45</sup>; 4) *bacc*, a splicing target  
362 we validated in embryos (**Supplementary Table S2**). Furthermore, we found that out of 615  
363 splicing events (452 genes) that differed between Kc and S2 cells, 54 RNAs directly interact with  
364 CLAMP targets by iCLIP including key regulators of splicing (**Column I, Sheet 1,**  
365 **Supplementary Table S5 and Fig S7A**). When we compared the CLAMP-dependent splicing  
366 events in cell lines with direct CLAMP iCLIP targets, we identified 10 genes which are direct  
367 CLAMP RNA targets suggesting that a subset of the splicing events is regulated by direct contact  
368 between CLAMP and RNA (**Column I, Sheet 2&3, Supplementary Table S5 and Fig S7B**).  
369 Thus, many of the direct CLAMP splicing targets are key regulators of alternative splicing  
370 suggesting that CLAMP functions as an upstream master regulator of sex-specific splicing by  
371 directly regulating the splicing of a subset of key splicing factors which then regulate alternative  
372 splicing of additional indirect targets.

373  
374  
375  
376  
377  
378  
379  
380  
381  
382  
383  
384  
385  
386  
387  
388  
389  
390  
391  
392  
393  
394  
395  
396  
397  
398  
399  
400  
401  
402  
403

In addition to target RNAs that require CLAMP for their alternative splicing, CLAMP also directly interacts with spliceosomal RNAs sex-specifically. We found that CLAMP binds to more snRNAs in males (snRNA=20) including U1-U6 snRNAs (**Supplementary Table S7**) compared to females (snRNA=8) (**Fig 4B, C**). In the male chromatin fraction, CLAMP interacts with the catalytic step 2 spliceosome consisting of U2, U5, U6 snRNAs (FDR:1.7E-3). In contrast, the female chromatin fraction is enriched for transcripts that encode proteins that bind to the U1-U2 snRNAs (FDR:1.1E-2), suggesting a different type of regulation of splicing in males and females. Furthermore, we determined the overlap between CLAMP-RNA interaction sites in the chromatin fraction (iCLIP data) with CLAMP DNA binding peaks (CUT&RUN<sup>46, 47</sup> cleavage under targets and release using nuclease) from S2 (male) and Kc (female) cell lines that we generated (#GSE220053). We found that 32.3% (335/1036) of CLAMP RNA binding peaks in the S2 cell chromatin fraction and 49.2% (221/449) of CLAMP RNA binding peaks in the Kc cell chromatin fraction overlapped with CLAMP DNA binding peaks in the respective cell lines (**Fig 4D**). Next, we plotted the frequency of identifying a CLAMP RNA peak on chromatin over a region  $\pm 1$  kb from the closest CLAMP DNA binding peak. We found that most overlapping CLAMP RNA peaks are within 250bp of the middle of the nearest CLAMP DNA peak in both male and female cells (**Fig 4E**), suggesting that CLAMP is linking RNA to DNA during co-transcriptional splicing at a subset of genes.

Integration of splicing analysis (**Figs 1, 2 & S2, 4/Tables S1, S3 and S5**), DNA-protein interaction data (ChIP-seq and CUT&RUN) (**Figs 3 & S6/Table S6**) and RNA-protein interaction data (iCLIP) (**Figs 4, S7/Table S7**), suggest that CLAMP interacts directly with a subset of its RNA targets to regulate co-transcriptional splicing, including key splicing regulators which likely amplify its function. Furthermore, CLAMP interacts with spliceosomal RNAs sex-specifically (**Fig 4B, C and Supplementary Table S7**). However, this integration does not fully explain how CLAMP regulates splicing in a sex-specific manner because CLAMP only binds to the RNA encoded by a subset of genes whose splicing is regulated by CLAMP. Therefore, we next asked how CLAMP modulates the function and localization of RBPs that have known sex-specific roles including those that physically associate with CLAMP from proteomic studies<sup>23</sup>.

404 **5. CLAMP interacts with RBP components of the spliceosome and influences their**  
405 **occupancy on chromatin**

406

407 Because CLAMP differentially regulates splicing in male and female cells, we hypothesized that  
408 CLAMP regulates recruitment of RBP components of the splicing machinery to chromatin  
409 differentially in males and females. To test our hypothesis, we first examined how CLAMP  
410 regulates the occupancy of MLE, an RNA helicase that is a component of both the MSL complex,  
411 present only in males<sup>48</sup>, and the spliceosome, present in both sexes<sup>49</sup>. Previous studies showed that  
412 CLAMP physically associates with MLE<sup>50-52</sup>. Therefore, we hypothesized that CLAMP regulates  
413 the distribution of MLE between the spliceosome and the MSL complex to modulate sex-specific  
414 alternative splicing in males.

415

416 To test this idea, we measured MLE distribution across the genome using CUT&RUN<sup>46,47</sup>. We  
417 performed CUT&RUN in both the presence and absence of maternal CLAMP, during both the  
418 pre-MZT and post-MZT embryonic stages in males (see methods). Our results show that MLE  
419 binds to chromatin both in males and females, with stronger binding in males (**Fig 5A**).  
420 Furthermore, the absence of CLAMP results in loss of MLE peaks in males but largely does not  
421 change MLE peaks in females (**Fig 5A, B**). This supports our hypothesis that CLAMP regulates  
422 MLE recruitment to chromatin in males.

423

424 We next compared the distribution and location of MLE peaks with that of CLAMP peaks  
425 previously identified in control embryos at the same time points<sup>28</sup> and classified MLE peaks into  
426 two groups: 1) MLE peaks that overlap with CLAMP peaks (**Fig 5C,D and Fig S8**) and 2) MLE  
427 peaks that do not overlap with CLAMP peaks (**Fig 5C,D and Fig S8**). We found that MLE peaks  
428 that overlap with CLAMP peaks are largely at promoters in both developmental stages (**Fig S8**). In  
429 contrast, the MLE peaks that do not overlap with CLAMP peaks are primarily localized to introns  
430 (both X-chromosomal and autosomal peaks in both developmental stages (**Fig S8**)).

431

432 In the absence of CLAMP, there is a considerable loss and redistribution of both overlapping and  
433 non-overlapping MLE peaks in males. We found that overall 59.1% (14,723/24,910) of MLE  
434 peaks were lost at the 2-4 Hr/post-MZT stage in the absence of CLAMP. Moreover, ~26%

435 (5773/22183 pre-MZT) and ~35% (5548/15735 post-MZT) of the MLE peaks observed in the  
436 absence of CLAMP were new peaks that were not present in control embryos (**Fig 5C-D**). After  
437 the loss of maternal CLAMP, ~23% (50/216) of MLE peaks overlapping with CLAMP peaks are  
438 lost at the pre-MZT stage which increases to ~51% (1,507/2,913) at the post-MZT stage (**Fig 5C-**  
439 **D**). Overall, our data suggest that MLE is redistributed in the absence of CLAMP. Therefore,  
440 CLAMP prevents aberrant recruitment of MLE in addition to the formation of aberrant splice  
441 isoforms (**Fig 2C**). Furthermore, we hypothesize that MLE which is at the new peaks in the absence  
442 of CLAMP is part of the spliceosome complex and not MSL complex because MSL complex is  
443 not present on chromatin in the absence of CLAMP<sup>40</sup>.

444

445 To provide insight into the differences between MLE peaks which overlap with CLAMP and those  
446 which do not, we identified sequence motifs which are enriched within each class of peaks using  
447 MEME within the time2splice pipeline. The known CLAMP motif<sup>40</sup>, a stretch of (GA)<sub>n</sub> repeats,  
448 is enriched at regions that are bound by both MLE and CLAMP independent of stage and  
449 chromosome type as expected. In contrast, MLE peaks which do not overlap with CLAMP have  
450 motifs with stretches of GTs, GCTs, and GTAs but not (GA)<sub>n</sub> repeats (**Fig S8**). In the absence of  
451 CLAMP, the remaining MLE peaks (red circle) were most enriched for (GT)<sub>n</sub> motifs (**Fig S8C,**  
452 **D**) which have known roles in splicing through encoding secondary RNA structures<sup>53-55</sup>.  
453 Therefore, CLAMP prevents MLE from redistributing to sequence motifs that are known  
454 regulators of splicing.

455

456 We also found that CLAMP changes the distribution of MLE relative to genes, increasing the  
457 frequency at which MLE is present at promoters instead of introns. MLE peaks that overlap with  
458 CLAMP peaks (intersection of green circle with red and grey circles, **Fig S8**) on the X-  
459 chromosome (**Fig S8A, C**) or autosomes (**Fig S8B, D**) are enriched at promoters (**Fig S8A, C** (X-  
460 chromosome), **Fig S8B, D** (Autosomes)). In contrast, **new** unique MLE peaks not overlapping  
461 with CLAMP (grey area in Venn diagrams, **Fig S8**) and those that are gained after *clamp* RNAi  
462 (red area in Venn diagrams, **Fig S8**) are enriched at introns (**Fig S8A, C** (X-chromosome), **Fig**  
463 **S8B, D** (Autosomes)). These results suggest that CLAMP sequesters MLE at (GA)<sub>n</sub> rich sequences  
464 within promoters that prevents it from binding to GT motifs within introns which regulate  
465 splicing<sup>53-55</sup>. Thus, in the absence of CLAMP, MLE is redistributed and aberrantly binds to intronic

466 sequences with known motifs that regulate splicing independent of whether present on the X-  
467 chromosome or autosomes.

468

469 To determine how MLE redistribution could alter sex-specific splicing, we plotted the distribution  
470 of MLE binding on CLAMP-dependent female and male-specifically spliced genes in the presence  
471 and absence of CLAMP (**Fig S9A, B**). Pre-MZT, MLE binds near the TSS of male-specifically  
472 spliced genes independent of maternal CLAMP (**Fig S9A**). At the post-MZT stage, loss of  
473 maternal CLAMP in male embryos causes MLE to change its binding distribution along the gene  
474 body (rectangle with dotted lines: **Fig S9B**) of CLAMP-dependent male-specifically spliced genes  
475 (blue line) relative to CLAMP-dependent female-specifically spliced genes (red line). These  
476 profiles are consistent with a model in which CLAMP regulates MLE distribution at male-  
477 specifically spliced genes to alter male sex-specific splicing. In males without CLAMP, increased  
478 MLE binding at female sex-specifically spliced genes (red line, enclosed within rectangle with  
479 dotted lines: **Fig S9B**) may result in aberrant differential splicing of these genes. Thus, our data  
480 suggests that CLAMP inhibits mis-localization of MLE to female sex-specifically spliced genes  
481 in males.

482

483 Next, we asked whether CLAMP associates with spliceosome complex protein components other  
484 than MLE, which is a component shared with the MSL complex. We have shown that CLAMP  
485 directly binds to snRNAs (**Fig 4C**) and previously reported that CLAMP physically associates  
486 with several spliceosome complex components based on mass spectrometry analysis<sup>23</sup>. To validate  
487 these associations, we performed co-immunoprecipitation (coIP) experiments to measure  
488 association between CLAMP and two hnRNP spliceosome components with known functions in  
489 sex-specific splicing, the conserved hrb27C and Squid proteins<sup>45,49,56</sup>. We found that in both S2  
490 (male) and Kc (female) cells, CLAMP interacts with hrb27C. In contrast, CLAMP only associates  
491 with Squid in female Kc cells and not in male S2 cells (**Fig S10A, B**), consistent with mass  
492 spectrometry data. In contrast to MLE and CLAMP which are enriched on the male X-  
493 chromosome, we found that Squid occupancy on polytene chromosomes is decreased on the male  
494 X-chromosome compared with the female X chromosome (**Fig S10C-E**). Therefore, it is possible  
495 that there is a competition between CLAMP recruitment of MSL complex to the male X-  
496 chromosome and CLAMP recruitment of the spliceosome complex containing Squid that



497 contributes to sex-specific splicing. Overall, CLAMP differentially associates with RBP  
498 spliceosome components in males and females, providing a potential mechanism by which  
499 CLAMP can regulate sex-specific splicing.

500

501 **6. CLAMP regulates the chromatin accessibility and splicing of the *sxl* gene, directly**  
502 **interacts with *sxl* RNA, and alters splicing of other sex determination pathway component**  
503 **genes**

504

505 Next, we asked how CLAMP physically and functionally interacts with known key regulators of  
506 sex-specific splicing. In *Drosophila*, sex-specific alternative splicing is regulated by the sex-  
507 determination pathway. Sex-lethal (Sxl) is the master regulator of sex determination<sup>57</sup> and drives  
508 subsequent sex-specific splicing in females<sup>58</sup> of downstream effector genes giving rise to female  
509 specific effector proteins (Fig 6A) that regulate female-specific splicing. Functional Sxl protein is  
510 only produced in females<sup>57,59</sup> because exon three in the *sxl* transcript contains a premature stop  
511 codon which is spliced out in females but retained in males<sup>60</sup>. Absence of functional Sxl protein  
512 in males results in formation of male-specific effector proteins that regulate male-specific splicing  
513 (Fig 6A). Therefore, we asked whether CLAMP regulates alternative splicing of the *sxl* transcript.

514

515 To test whether CLAMP regulates *sxl* alternative splicing, we designed an RT-PCR assay to  
516 distinguish between the female-specific (excluding exon 3) and male-specific (including exon 3)  
517 versions of the *sxl* transcript (**Fig 6B**). To determine whether maternal CLAMP regulates splicing  
518 of the *sxl* transcript, we performed RT-PCR analysis of *sxl* splicing. In contrast to the much later  
519 larval stage (**Fig S11A**), in embryos, the male and female isoforms of Sxl have not become fully  
520 specified, consistent with the known autoregulation of *sxl* that occurs in embryos<sup>57,59,61,62</sup>. Despite  
521 the lack of complete specification of male and female *sxl* transcripts, our data show that maternal  
522 CLAMP promotes the sex-specific splicing of *sxl* transcripts in 0-2 and 2-4 Hr embryos because  
523 the male-specific transcript is not expressed in maternal CLAMP-depleted male embryos but is  
524 expressed in CLAMP-depleted female embryos (**Fig 6B**). Consistent with the ChIP-seq binding  
525 pattern of CLAMP at the *sxl* locus on chromatin (**Fig 3, 6C**) which show enhanced binding in 2-4  
526 Hr embryos compared with pre-MZT embryos, there is an enhanced function for CLAMP in  
527 splicing at 2-4 hours compared with 0-2 hours.

528

529 Next, we assayed the function of zygotic CLAMP in *sxl* splicing in three previously described fly  
530 lines: 1) our recessive *clamp* null mutant *clamp*<sup>2</sup> line<sup>27</sup>; 2) the heterozygous mutant *clamp*<sup>2</sup>/*CyO*-  
531 *GFP* line; 3) our rescue line which is homozygous for the *clamp*<sup>2</sup> allele and contains a rescue  
532 construct which is an insertion of the wild type *CLAMP* gene at an ectopic genomic location. We  
533 measured CLAMP-dependent changes in alternative splicing of *sxl* and found that in homozygous  
534 *clamp*<sup>2</sup> female animals, there is a small but detectable amount of the longer male-specific *sxl*  
535 transcript (**Fig S11A**, lane c). This mis-regulation of *sxl* splicing is rescued by our *CLAMP*-  
536 containing rescue construct (**Fig S11A**, lane d). Furthermore, our iCLIP data show that CLAMP  
537 directly binds to *sxl* transcripts in female but not male cells (**Supplementary Table S7**) and our  
538 L3 RNA-seq data demonstrate that CLAMP regulates *sxl* splicing in females (**Supplementary**  
539 **Table S3**) and not *sxl* transcription (**Supplementary Table S4**). These data suggest that one way  
540 in which CLAMP functions in sex-specific splicing in females is upstream of Sxl by binding to  
541 both DNA and RNA at the *sxl* locus to regulate splicing.

542

543 To test whether defects in *sxl* splicing altered Sxl protein levels, we performed western blots to  
544 quantify Sxl protein in wild type females and males and *clamp*<sup>2</sup> null females (**Fig S11B**). We  
545 observed a reduction in Sxl protein levels in females in the *clamp*<sup>2</sup> null background when compared  
546 with controls. Also, homozygous *clamp*<sup>2</sup> mutant males die before the late third instar larval stage,  
547 and therefore it was not possible to measure the splicing of transcripts in male *clamp*<sup>2</sup> mutant  
548 larvae.

549

550 When comparing our RT-PCR assay measuring *sxl* splicing (**Fig S11A**) with western blotting  
551 analysis measuring Sxl protein levels (**Fig S11B**), we observed a more dramatic reduction in Sxl  
552 protein levels compared to changes in splicing. We have also found that CLAMP binds to the  
553 5'UTR region of the *sxl* transcript in females (**Fig S11C**) and regulation of translation by 5'UTR  
554 binding is a common mechanism for regulating protein stability<sup>63,64</sup>. Therefore, we speculate that  
555 CLAMP binding to the 5'UTR of *sxl* transcripts in females (**Supplementary Table S7**) may  
556 function in translational regulation of the Sxl protein. Furthermore, CLAMP interacts sex-  
557 specifically with the translation factor FMRP in the male cytoplasm (**Fig S11D**), indicating  
558 CLAMP might also have a distinct differential influence on translation in male and females

559 depending on interacting translation regulatory proteins. Together, these data suggest that it is  
560 possible that mis-regulation of translation amplifies the CLAMP-dependent mis-regulation of  
561 splicing to generate a larger decrease in Sxl protein levels in the absence of CLAMP. Future  
562 experiments are required to test this hypothesis and decipher underlying mechanisms. Independent  
563 of a potential effect on translation mediated by sex-specific FMRP interaction, we determined that  
564 CLAMP promotes female-specific splicing of the *sxl* transcript as one mechanism to ensure that  
565 normal Sxl protein levels are produced in females.

566

567 Next, we wanted to determine the mechanism by which CLAMP regulates splicing of *sxl*. Recent  
568 reports provide strong evidence that increased chromatin accessibility contributes substantially to  
569 the retention of introns during AS<sup>65</sup>. In addition, splicing-associated chromatin signatures have  
570 recently been identified<sup>66</sup>. CLAMP regulates chromatin accessibility<sup>29</sup> and both CLAMP ChIP-  
571 seq data from sexed embryos (**Fig 6C**) and CUT&RUN data from cell lines (**Fig S11E**) shows that  
572 CLAMP binds differentially to the *sxl* gene in females compared to males. Therefore, we  
573 measured chromatin accessibility at the *sxl* gene locus in S2 (male) and Kc (female) cells in the  
574 presence and absence of CLAMP by mining our previously generated Micrococcal Nuclease  
575 sequencing data<sup>21</sup>. Regions of the genome that are accessible have a positive MACC score (shown  
576 in blue), and regions of the genome that are inaccessible have a negative score (shown in red)  
577 (range is between -0.33(red) and +1.33 (blue)). We found that after the loss of CLAMP in female  
578 Kc cells, chromatin accessibility at exon three of *sxl* increases significantly (**Fig S11F**). In females  
579 in which CLAMP has been deleted but not control females, *sxl* exon three shows a strong and  
580 statistically significant MACC peak<sup>21</sup> indicative of open chromatin (**Fig S11F** boxed rectangular  
581 inset). Therefore, CLAMP normally promotes a closed chromatin environment at exon three in  
582 females but not males.

583

584 Our MNase-seq data combined with our splicing results and recent literature on the link between  
585 chromatin and splicing suggest that increased chromatin accessibility in males compared to  
586 females may cause the retention of exon three in the male *sxl* transcript. Consistent with our results  
587 in males, open chromatin marks such as H3K4me1 & H3K4me2 are enriched just upstream of the  
588 start site of retained exons<sup>66</sup>. In contrast, histone marks associated with condensed chromatin such

589 as H4K20me1&2, H3K9me3, and H3K27me3 are highly enriched at excluded exons<sup>66</sup>, consistent  
590 with our results in females.

591

592 To further define how CLAMP and Sxl function dependently and independently of each other to  
593 regulate sex-specific splicing, we asked whether CLAMP directly binds to RNA targets that have  
594 Sxl binding motifs using our iCLIP data. Overall, we found that ~20% of CLAMP RNA targets  
595 have Sxl motifs suggesting that CLAMP and Sxl have shared and independent targets (**Fig S12A**).  
596 Next, we compared CLAMP RNA targets (nuclear iCLIP) from female Kc cells with the only  
597 available data identifying RNAs that interact with Sxl which was generated from adult females  
598 (#GSE98187). Even though the data sets are not from the same type of biological sample, we still  
599 determined that 81/286 (28.32%) of CLAMP bound RNAs in Kc cells overlap with Sxl targets in  
600 adult females (**Fig S12B, C and Supplementary Table S8**). Overlapping targets include *sxl*  
601 transcripts and snRNAU5, a component of the U5snRNP complex involved in splicing<sup>67</sup>.  
602 Interestingly, 26.5% (173/654) of CLAMP iCLIP RNA targets from S2 cells (male) overlapped  
603 with Sxl female RNA targets, indicating that CLAMP may bind to RNAs in male cells that are Sxl  
604 targets in females (**Fig S12B, C and Supplementary Table S8**).

605

606 Also, 88/388 (22.68%) of the CLAMP-dependent sex-specific spliced genes are Sxl targets  
607 (**Supplementary Table S9**). We also determined which of the CLAMP-dependent sex-  
608 specifically spliced genes products directly interact with CLAMP or Sxl or both factors  
609 (**Supplementary Table S10, Fig S12D**). These results further support our hypothesis that CLAMP  
610 functions through multiple mechanisms to regulate sex-specific splicing: 1) CLAMP regulates a  
611 subset of targets through direct binding to DNA and RNA of target genes including the Sxl gene  
612 itself and other key regulators of alternative splicing; 2) CLAMP regulates other targets indirectly  
613 through regulating Sxl splicing and protein levels.

614

615 To further understand the direct and indirect roles of maternal and zygotic CLAMP in sex-specific  
616 splicing, we examined the splicing of other components of the sex determination pathway  
617 downstream of Sxl (**Fig 6D, E and S11G-H**). In embryos which lack maternal CLAMP (**Fig 6D**,  
618 lane 2-3), the *dsx* female-specific transcript is aberrantly produced in males (**Fig 5D**, lanes 2-5). In  
619 contrast, the male-specific *dsx* transcript is not expressed in male embryos which lack CLAMP,

620 similar to wild type female embryos (**Fig 6D**, lane 7-10). We also observed male-specific *dsx*  
621 transcripts in female *clamp*<sup>2</sup> mutant larvae (**Fig S11G**, lane c). Therefore, *dsx* splicing is regulated  
622 by maternal and zygotic CLAMP and CLAMP binds directly to the *dsx* gene locus (**Fig S12E**) but  
623 not to *dsx* RNA (**Supplementary Table 7**). These data suggest that CLAMP may regulate *dsx*  
624 splicing via both Sxl-dependent and Sxl-independent mechanisms.

625

626 In addition, we found that maternal and zygotic CLAMP regulates splicing of the male-specific  
627 lethal-2 (*msl-2*) transcript, which is male-specific because Sxl regulates its splicing, transcript  
628 stability, mRNA export, and translation in females<sup>68</sup> (**Fig 6E**, **Fig S11H**, lane c). To determine  
629 whether splicing defects also cause dysregulation of MSL-2 protein expression and localization to  
630 chromatin, we performed polytene immunostaining from female *clamp*<sup>2</sup> mutant salivary glands. In  
631 the absence of CLAMP, ectopic MSL2 protein (in red) is present at several locations on female  
632 chromatin in contrast to controls (*clamp*<sup>2</sup>/*CyO-GFP* heterozygous females) where MSL-2 protein  
633 is not present on chromatin, consistent with lack of MSL complex formation in wild type females  
634 (**Fig S11I**). Similar to *dsx*, the *msl-2* gene is also bound by CLAMP (**Fig S12F**) and regulated by  
635 Sxl and therefore could be regulated through both direct and indirect mechanisms. In addition,  
636 CLAMP binds to the DNA and RNA that encodes another sex-specific splicing regulator and Sxl  
637 target gene *fru* (*fruitless*) (**Supplementary Table S7**). Together, these data reveal that CLAMP  
638 regulates the splicing and protein expression of multiple components of the sex determination  
639 pathway via Sxl-dependent and Sxl-independent mechanisms.

640

641 To determine which factors may function with CLAMP to regulate sex-specific splicing in addition  
642 to Sxl, we analyzed our iCLIP CLAMP RNA binding data (**Supplementary Table 7**) for motifs  
643 of other RNA binding proteins involved in splicing<sup>49</sup> (**Fig S13**). We found that 70-80% of CLAMP  
644 bound RNA sequences contain motifs for Tra which functions downstream of Sxl (Male  
645 Chromatin Fraction, N=645; Male Nucleoplasmic Fraction, N=53; Female Chromatin Fraction,  
646 N=203; Female; Nucleoplasmic Fraction, N=119). Furthermore, 30-50% of CLAMP bound RNA  
647 sequences contain motifs for Lark, a splicing factor homologous to human RBM4<sup>69</sup>, and  
648 *Drosophila* homologues of the hnRNPA/B family of splicing factors, Hrb98DE/Hrb87F/Hrb27C<sup>49</sup>  
649 (**Fig S13**). We had previously identified an association of CLAMP with Hrb27C by MALDI-MS<sup>23</sup>  
650 which we now validated by co-immunoprecipitation (**Fig S10A**). Together, our generation and

651 integration of functional sex-specific splicing analysis with RNA-TF interactions, DNA-TF  
652 interactions, chromatin accessibility, and protein-protein interaction data reveal new mechanisms  
653 by which TFs function with RBPs to regulate co-transcriptional splicing that promotes a key  
654 developmental decision very early in development.

655

## 656 **Discussion:**

657

### 658 **A maternal factor links transcription to splicing during the earliest stages of sexual** 659 **differentiation**

660

661 Alternative splicing (AS) is a highly conserved mechanism that generates transcript and protein  
662 diversity<sup>70-72</sup>. Several studies have reported highly dynamic RNA bound proteomes (RBPs) during  
663 the Maternal Zygotic Transition (MZT) across diverse phyla, with widespread alternative splicing  
664 events occurring during early embryonic development<sup>31,73-76</sup>. Furthermore, diverse isoforms are  
665 present in the pool of maternal and zygotic transcripts during early development<sup>30,31</sup>. However,  
666 the mechanisms that integrate the function of TFs and RBPs to regulate transcript diversity in a  
667 context-specific manner during the earliest hours of development remain elusive.

668

669 Maternally-deposited pioneer transcription factors drive zygotic genome activation, but their role  
670 in generating transcription diversity in the early embryo was unknown. Here, we define sex-  
671 specific alternatively spliced isoforms in pre- and post-MZT *Drosophila melanogaster* female and  
672 male embryos genome-wide for the first time. We show that sex-specific transcript diversity occurs  
673 much earlier in development than previously thought by generating the earliest data that define  
674 sex-specific transcript diversity across species. Furthermore, we identify how a maternally-  
675 deposited pioneer TF, CLAMP, regulates sex-specific transcript diversity in early embryos. Prior  
676 work on sex-specific transcript diversity<sup>37,56,73,76-82</sup> either examined sex-biased differences in gene  
677 expression only or sex-specific transcript diversity much later in development in adult gonads or  
678 brain. To overcome the challenge of sexing early embryos before zygotic genome activation, we  
679 used a meiotic drive system that generates sperm with either only X or only Y chromosomes<sup>16</sup> and  
680 measured both transcription and sex-specific transcript diversity generated by alternative splicing.

681

682 We show even following the initial few hours of its existence, there is a clear difference between  
683 a male and female *Drosophila* embryo's transcript variation that was not previously identified  
684 (**Figs 1, 2**). Because the transcript variants in both males and females encode genes that are  
685 involved in developmental processes, sex-specific developmental distinctions may occur earlier  
686 than previously thought. We demonstrate that a fundamental developmental trajectory differs  
687 between males and females from the initial hours of their existence long before gonad formation.  
688 Such early sex-specific transcript diversity may provide insight into how developmental disorders  
689 that originate before gonad formation can exhibit variable penetrance between sexes.

690

691

692 Different splice variants are produced at different frequencies over time and between sexes. To  
693 date, we lacked pipelines to characterize how these isoforms change over time. Therefore, we  
694 developed time2splice, which identifies mechanisms to regulate temporal and sex-specific  
695 alternative splicing by combining RNA-seq and protein-DNA interaction data from CUT&RUN  
696 and ChIP-seq experiments. Time2splice has three parts: 1) temporal splicing analysis based on the  
697 SUPPA algorithm; 2) temporal protein-DNA analysis, and 3) temporal multi-omics integration.  
698 The pipeline and analysis steps can be accessed at:  
699 <https://github.com/ashleymaeconard/time2splice>.

700

701

702 We defined groups of genes in both males and females that undergo alternative splicing events  
703 which are regulated by maternally-deposited and zygotically-expressed CLAMP. Thus, the  
704 maternal environment both regulates transcription initiation and shapes RNA processing events  
705 that are maintained later during development. The key question is: How does CLAMP, a  
706 ubiquitously expressed pioneer TF, regulate sex-specific splicing? We identified several  
707 mechanisms by which CLAMP regulates sex-specific splicing.

708

709 **CLAMP regulates sex-specific splicing via multiple mechanisms that include context-specific**  
710 **interaction with target RNAs and RBPs**

711

712 CLAMP binds directly to intronic regions of approximately half of the sex-specifically spliced  
713 genes that it regulates in both males and females suggesting a direct role in regulating their co-  
714 transcriptional splicing by altering the recruitment of spliceosomal components or chromatin  
715 accessibility. Our data supports a model in which direct CLAMP binding to DNA and RNA  
716 regulates the splicing of a subset of its target genes (**Fig 3 & 4D, E and Supplementary Table**  
717 **S6&S7**). Many of these direct target genes are key regulators of alternative splicing, further  
718 enhancing the effect of CLAMP on splicing (**Supplementary Table S2, S7**). Because not all  
719 CLAMP-interacting RNAs on chromatin are differentially spliced, we hypothesize that CLAMP  
720 has other regulatory co-transcriptional functions such as potentially regulating transcript stability  
721 or nuclear export which require future investigation.

722  
723 Furthermore, CLAMP regulates chromatin as a pioneer TF<sup>21,29</sup> and recent literature links  
724 chromatin and splicing<sup>65,66</sup>. For example, closed chromatin marks have recently been linked to  
725 exon exclusion and open chromatin has been linked to exon inclusion<sup>65,66</sup>. Our results also indicate  
726 that CLAMP associates with the functional spliceosome complex in males but not in females  
727 (**Supplementary Table S7 and Fig 4C**). Proteomic analysis<sup>23</sup> and coIPs (**Fig S10 A, B**) show that  
728 CLAMP is associated with spliceosome complex components like Squid, a known to regulate sex-  
729 specific splicing<sup>56</sup>, specifically in females and with MLE, a component of both the spliceosome  
730 and MSL complex<sup>48</sup> only in males. These data support a model in which differential association  
731 between CLAMP and RBP spliceosome complex components in males and females regulates sex-  
732 specific splicing. Thus, we hypothesize that CLAMP may recruit RBP spliceosome complex  
733 components to regulate splicing by altering the chromatin environment or/and directly binding to  
734 target RNA transcripts (**Fig 7A**).

735  
736 Our results also show that CLAMP inhibits aberrant splicing events in males, especially at the  
737 post-MZT stage (**Fig 2C**) and the distribution of MLE, an RNA helicase component of the  
738 spliceosome on chromatin is CLAMP-dependent (**Fig 4A**). = In the absence of CLAMP, the  
739 fraction of promoter bound MLE is reduced and MLE re-localizes from its normal intronic binding  
740 sites to new intronic regions that contain GT sequence motifs (**Fig S8**) known to regulate splicing<sup>53-</sup>  
741 <sup>55</sup>. Therefore, we hypothesize that CLAMP regulates the localization of MLE to suppress aberrant  
742 female-specific splicing events in males. Because MLE is part of the MSL complex only in males



743 and the spliceosome complex in both sexes, we hypothesize that CLAMP influences the relative  
744 distribution of MLE between two different ribonucleoprotein complexes: 1) the MSL complex;  
745 and 2) the spliceosome, co-regulating sex-specific splicing and male X-chromosome dosage  
746 compensation (**Fig 7B**). Without CLAMP, the MSL complex does not localize to the X-  
747 chromosome and becomes destabilized<sup>40</sup>; thus, MLE is no longer part of the MSL complex and is  
748 available to redistribute to new spliceosome binding sites. Therefore, we provide evidence to  
749 support a model in which CLAMP sex-specifically inhibits aberrant binding of MLE to motifs that  
750 regulate splicing which alters sex-specific transcript diversity.

751  
752 To provide mechanistic insight into how a pioneer transcription factor like CLAMP regulates sex-  
753 specific splicing in females, we investigated the role of CLAMP in regulating the *sxl* gene locus,  
754 the master regulator of sex-determination pathway<sup>57</sup>. CLAMP binds near the early promoter of the  
755 *sxl* gene (SxlPe) and regulates the chromatin environment at exon three of *sxl* which is normally  
756 spliced out in females (**Fig 7C**). Consistent with recent literature linking chromatin accessibility  
757 to alternative splicing<sup>65,66</sup>, we hypothesize that closed chromatin at exon three induces exclusion  
758 of this exon from female *sxl* transcripts. In the absence of CLAMP in females, the chromatin  
759 becomes more open, and the *sxl* transcript is not bound by CLAMP. Therefore, exon three is  
760 included in a subset of *sxl* transcripts in females which reduces the levels of functional Sxl protein  
761 due to the incorporation of a stop codon, thus dysregulating downstream splicing events (**Fig 7C**).  
762 Because CLAMP binding sites are present near the promoter region of the *sxl* gene, we hypothesize  
763 that CLAMP regulates chromatin at exon three from a distance, consistent with our recent findings  
764 suggesting that CLAMP can mediate long-range chromatin interactions<sup>83,84</sup> and act on chromatin  
765 accessibility at a distance<sup>21</sup>.

766  
767 Furthermore, CLAMP binds to the 5'UTR of the *sxl* transcript (**Fig S11H**) specifically in females,  
768 which we hypothesize is important for regulating *sxl* translation because we observe a stronger  
769 reduction in Sxl protein levels in females in absence of CLAMP compared with the effects on  
770 female-specific splicing (**Fig S11A, B**). Both the decreased Sxl protein levels in female *clamp*<sup>2</sup>  
771 mutants and mis-expression of female and male-specific *dsx* transcripts suggest that CLAMP may  
772 regulate sexual differentiation because sex-specific Dsx protein isoforms are known determinants  
773 of sexual dimorphism across species<sup>57</sup>. Also, CLAMP directly binds to the DNA of *sxl*, *dsx*, and

774 *msl-2* target genes, suggesting a direct role in regulating these loci. Furthermore, CLAMP binds to  
775 the DNA and RNA of *sxl* and *fru*. Fruitless (*fru*) encodes a BTB zinc finger transcription factor  
776 that contributes to sexual differentiation of neural circuits<sup>85,86</sup> and many CLAMP-dependent sex-  
777 specifically spliced genes regulate neural development (**Fig 2E**).

778

779 Because CLAMP and Sxl have both overlapping and distinct targets (**Supplementary Tables S8,**  
780 **9, 10 and Fig S13A-D**), we hypothesize that CLAMP regulates sex-specific splicing both via the  
781 Sxl-mediated sex-determination pathway as well as independent from Sxl. In support of our  
782 hypothesis, CLAMP RNA binding sequences share motifs with other RNA binding proteins  
783 involved in splicing (**Fig S13E**), some of which are sex-specific protein interaction partners of  
784 CLAMP<sup>23</sup>. Therefore, CLAMP may regulate splicing through at least two possible mechanisms  
785 that are not mutually exclusive: 1) CLAMP directly regulates the splicing of a subset of sex-  
786 specifically spliced genes by linking RNA to chromatin and altering the recruitment of the  
787 spliceosome; 2) CLAMP regulates the sex-specific splicing of transcripts indirectly by functioning  
788 upstream of Sxl which is a known regulator of splicing of downstream genes such as *msh-2* and  
789 *dsx*.

790

791 Overall, we hypothesize that both different composition of the spliceosome and its differential  
792 recruitment to chromatin drive sex-specific changes in splicing. We identify CLAMP as a maternal  
793 factor that regulates sex-specific alternative splicing through its sex-biased association with the  
794 DNA and RNA of target genes, sex-biased recruitment of spliceosome components, and its ability  
795 to influence the sex determination pathway. Identifying the factors that regulate this sex-biased  
796 association of CLAMP with spliceosome complex components will be a key future direction.

797

798 Here, we show for the first time that a maternal factor controls sex-specific splicing during early  
799 embryonic development, highlighting how the maternal environment influences transcript  
800 diversity in the zygote from activation of the zygotic genome to the processing of zygotic RNA  
801 products. Consistent with recent literature linking chromatin accessibility and splicing, our results  
802 suggest that CLAMP could be one example of a more general splicing regulatory mechanism  
803 controlled by the interaction between pioneer TFs that alter chromatin accessibility and  
804 components of the RNA processing machinery which generates spatial-temporal transcript

805 diversity. Consistent with this hypothesis, many transcription factors have recently been shown to  
806 interact directly with RNA<sup>87-89</sup>. While we analyzed sex-specific transcriptome diversity in this  
807 study and linked it to the sex-specific dosage compensation process, similar mechanisms could  
808 drive cell-type specific variation. For example, cell fate-determining transcription factors could  
809 regulate the chromatin occupancy of splicing complex components to promote the formation of  
810 cell-type-specific isoforms. We also present time2splice, a new pipeline to uncover mechanisms  
811 which drive such spatial-temporal transcript diversity by integrating splicing and chromatin  
812 occupancy data.

813

814

## 815 **Materials and Methods:**

816

### 817 **Fly strains and husbandry**

818 *Drosophila melanogaster* fly stocks were maintained at 24°C on standard corn flour sucrose  
819 media. Fly strains used: *MTD-GAL4* (Bloomington, #31777), *UAS-CLAMP RNAi[val22]*  
820 (Bloomington, #57008), Meiotic drive fly stocks +; SD72/CyO and 19-3, yw, Rsp[s]-  
821 B[s]/Dp(2:y)CB25-4, y+, Rsp[s]B[s]; SPSD/CyO (Bloomington, #64332) (both gifts from  
822 Cynthia Staber). These were crossed to obtained male and female embryo of desired genotypes  
823 according to Rieder et al 2017.

824

### 825 **Cell culture**

826 Kc and S2 cells were maintained at 25°C in Schneider's media supplemented with 10% Fetal  
827 Bovine Serum and 1.4X Antibiotic-Antimycotic (Thermofisher Scientific, USA). Cells were  
828 passaged every 3 days to maintain an appropriate cell density.

829

### 830 **Sample collection and Western blotting**

831 Salivary glands from third instar larvae were dissected in cold PBS and samples frozen in liquid  
832 nitrogen. Total protein from the samples was extracted by homogenizing tissue in the lysis buffer  
833 (50mM Tris-HCl pH 8.0, 150mM NaCl, 1% SDS, 0.5X protease inhibitor) using a small pestle.  
834 After a five-minute incubation at room temperature, cleared the samples by centrifuging at room  
835 temperature for 10 minutes at 14,000xg. To blot for CLAMP and Actin, 5 micrograms of total

836 protein was run on a Novex 10% Tris-Glycine precast gel (Life technologies). To measure Sex-  
837 lethal protein levels, 20 micrograms of total protein was run on a Novex 12% Tris-Glycine precast  
838 gel (Life technologies). Protein was transferred to PVDF membranes using the iBlot transfer  
839 system (ThermoFisher Scientific) and probed the membranes for CLAMP (1:1000, SDIX), Actin  
840 (1:400,000, Millipore), and SXL (1:500, a gift from Fatima Gebauer) antibodies using the Western  
841 Breeze kit following the manufacturer's protocol (ThermoFisher Scientific). We quantified the  
842 relative expression of protein for SXL using the gel analysis tool in ImageJ software following the  
843 website's guidelines<sup>90</sup>. For each genotype, we first internally normalized the amount of SXL  
844 protein to Actin. Next, we determined the protein's relative expression by comparing the Actin  
845 normalized quantities to y[1], w[1118] female samples.

846

#### 847 **Polytene chromosome squashes and immunostaining**

848 Polytene chromosome squashes were prepared as previously described in Reider et al. 2017. We  
849 stained polytene chromosomes with rabbit anti-CLAMP (1:1000, SDIX), mouse anti-Squid (1:50,  
850 1B11, DSHB), rat anti-MSL2 (1:500, gift from Peter Becker) antibodies. For detection, we used  
851 all Alexa Fluor secondary antibodies against rabbit and mouse at a concentration of 1:1000 and  
852 visualized slides at 40X on a Zeiss Axioimager M1 Epifluorescence upright microscope with the  
853 AxioVision version 4.8.2 software.

854

#### 855 **Splicing assays for male and female-specific transcripts**

856 To test for the male and female splice forms of *sex-lethal*, *transformer*, *doublesex*, and *msl2*, total  
857 RNA was extracted from ten third instar larvae from each genotype. We reverse-transcribed two  
858 micrograms of total RNA using the SuperScript VILO cDNA Synthesis Kit (Life Technologies)  
859 following the manufacturer's protocol. We amplified target sequences by PCR using primers  
860 designed to span Alternatively spliced junctions. Alternative splicing primer sequences for *sxl* FP-  
861 TGCAACTCACCTCATCATCC, *sxl* RP- GATGGCAGAGAATGGGACAT, for *tra* FP-  
862 TGAAAATGGATGCCGACAG, *tra* RP- CTCTTTGGCGCAATCTTCTC, for *dsx* female  
863 transcript *dsx*FFP-CTATCCTTGGGAGCTGATGC, *dsx*F RP-  
864 TCGGGGCAAAGTAGTATTCG, for *dsx* male transcript *dsx*M FP-  
865 CAGACGCCAACATTGAAGAG, *dsx*M RP- CTGGAGTCGGTGGACAAATC, for *msl2* FP-  
866 GTCACACTGGCTTCGCTCAG and *msl2* RP- CCTGGGCTAGTTACCTGCAA were used.

867

868 **Validation of splicing results from time2splice using qRT-PCR and RT-PCR assays:**

869 Total RNA was extracted from fifty 0-2 Hr and 2-4 Hr female and male embryos expressing *MTD-*  
870 *GAL4>GFPRNAi* (con) and *MTD-GAL4>CLAMP RNAi* (CLAMP depleted). Sexed embryos were  
871 obtained as described in Reider et al 2017. We reverse-transcribed one microgram of total RNA  
872 using the SuperScript VILO cDNA Synthesis Kit (Life Technologies, USA) following the  
873 manufacturer's protocol. We amplified target sequences by PCR using primers designed to span  
874 alternatively spliced junctions (**Fig S4**) listed in **Table S11** and Quick load Taq 2X Master mix  
875 (#M0271L, NEB, USA) according to the manufacturer's protocol (28 cycles). 10ul of PCR product  
876 of each replicate for each gene was loaded in separate wells in 2% agarose gels and imaged using  
877 a ChemiDoc<sup>TM</sup> MP Imaging system (BioRad, USA). All replicates for each gene were loaded on  
878 the same gel. The gel images were inverted and then quantified using the densitometry steps with  
879 the Fiji image analysis tool. qRT-PCR was carried out using 2X Azura Quant Green (#AZ-2120,  
880 Azura genomics, USA) according to the manufacturer's instructions. Fold change between  
881 samples for each transcript was calculated the  $\Delta$ CT method (Schmittgen and Livak 2008).  
882 Student's t-tests were performed to determine significant difference between groups (two samples  
883 at a time). Three replicates for qRT-PCR samples and four replicates for RT-PCR samples were  
884 performed.

885

886 **Immunoprecipitation**

887 *Nuclear and Cytoplasmic extract preparation:* Male (S2) and female (Kc) cells were grown to a  
888 cell concentration of  $2 \times 10^6$  cells/mL in T25 tissue culture flasks. Cells were scraped from the  
889 flask, centrifuged for 5min at 2500rpm at 4°C. Supernatant was removed and cell pellets were  
890 washed twice in 5ml of cold PBS. The washed cell pellets were then resuspended in 5X volume  
891 of Buffer A (10mM HEPES pH7.9, 1.5mM MgCl<sub>2</sub>, 10mM KCl, 0.5mM DTT, 1X Protease  
892 inhibitors). Cells were incubated on ice for 15 minutes before dounce homogenization with an A  
893 pestle. Cytoplasmic fraction was collected after centrifugation at 4°C for 20 min at 700xg. The  
894 remaining nuclear pellet was re-suspended in 3 times volume in Buffer B (20 mM HEPES pH 7.9,  
895 20% Glycerol, 0.5% NP 40, 200mMKCl, 0.5 mM EDTA, 1m MEGTA, 1X protease inhibitors).  
896 Nuclei after re-suspension were dounce homogenized with a B pestle. Nuclear debris was then  
897 pelleted by centrifugation at 10,000xg for 10 min at 4°C. 1 ml aliquots of both cytoplasmic and

898 nuclear fractions were prepared in 1.5mL Protein LoBind Eppendorf tubes and flash frozen in  
899 liquid nitrogen for storage at -80 °C.

900

901 *Immunoprecipitation:* Magnetic anti-CLAMP beads were prepared to a final concentration of  
902 10mg/mL by coupling rabbit anti-CLAMP antibody (SDIX) to magnetic beads, according to  
903 Dynabeads Antibody coupling kit (ThermoFisher Scientific) instructions. Similarly, Magnetic  
904 anti-FMRP beads were prepared using mouse anti-FMRP (5B6, DSHB, USA). Prepared anti-  
905 CLAMP, anti-FMRP and purchased anti-IgG (anti-rabbit IgG M-280 and anti-mouse IgG M-280  
906 Dynabeads raised in sheep, Invitrogen, USA) were blocked to reduce background the night before  
907 the immunoprecipitation. First, the beads were washed 3 times for 5 minutes in 500L Tris-NaCl  
908 Wash (50mM Tris, 500mM NaCl, 0.1% NP-40) by rotating at 4C. The beads were next suspended  
909 in block buffer (3.3mg/mL of yeast tRNA extract prepared in 20mM HEPES, pH 7.9, 20%  
910 Glycerol, 0.5% NP-40, 200mM KCl, 1mM EDTA, and 2mM EGTA) and rotated overnight at 4C.  
911 The next day, beads were washed 3 times for 5 minutes in the block buffer without yeast tRNA by  
912 rotating at 4°C. After the final wash, beads were resuspended in the same amount of block buffer  
913 as the starting volume.

914

915 To 1mL of previously prepared nuclear extract, 100uL of blocked anti-CLAMP, anti-FMRP or  
916 anti-IgG magnetic Dynabeads were added. The nuclear extracts/cytoplasmic extracts and beads  
917 were then rotated for 1 hour at 4°C. Afterward, the beads were collected and the supernatant  
918 discarded. The beads were then washed three times in Tris-NaCl wash (50mM Tris, 500mM NaCl,  
919 0.1% NP-40) by rotating for 5 minutes at 4°C and cleared by using a magnetic rack. To elute  
920 proteins from the beads, 100uL of 1% SDS was added, and the beads were boiled for 10 minutes  
921 at 95C. To the eluate, 300uL of ultrapure water was added, and the tubes gently vortexed. After  
922 collecting the beads on a magnetic rack, the eluate was saved in a clean Protein LoBind Eppendorf  
923 tube.

924

925 *Western blotting:* Squid and Hrb27C were detected in IP-CLAMP and IgG-rabbit protein samples  
926 using mouse anti-Squid (1:500, 1B11, DSHB) and rabbit anti-Hrb27C (1:5000, Fatima Gebauer),  
927 performed as mentioned above under western blotting protocol. CLAMP was detected in IP-FMRP  
928 and IgG-mouse samples using rabbit anti-CLAMP (1:1000).

929

930 **CUT&RUN**

931 *CUT&RUN in embryos*: 0-2 hr and 2-4 hr male and female embryos of desired genotypes (~50  
932 each) were collected on standard grape juice agar medium and washed with water. The embryos  
933 were dechorionated in 6% bleaching solution for 2 min and washed twice in ice cold 1XPBS.  
934 Centrifuged at 12,000g for 10 min at 4°C. Supernatants were discarded and embryos resuspended  
935 in 200µl Dig-Wash buffer with EDTA (20mM HEPES-NaOH, 150mM NaCl, 2mM EDTA,  
936 0.5mM Spermidine, 10mM PMSF, 0.05% digitonin) and washed twice. Embryos were incubated  
937 in 200µl primary antibody overnight at 4°C on a tube rotator. Next, embryos were centrifuged at  
938 12,000g for 10 min at 4°C and liquid removed and embryos were washed twice in Dig-Wash buffer  
939 with EDTA. Then, embryos were incubated for 3 hours at 4°C in ~700 ng/ml pAMNase solution  
940 in Dig-Wash buffer with EDTA. Embryos were washed twice in Dig-Wash buffer without EDTA  
941 and resuspended in 150µl of Dig-Wash buffer without EDTA. Samples were equilibrated to 0°C  
942 on a heat block maintained on ice-bath. 2µl of 100mM CaCl<sub>2</sub> added to each sample to initiate  
943 MNase activity and digestion was performed for 30 min before adding 150µl of 2X RSTOP Buffer  
944 (200mM NaCl, 20mM EDTA, 4mM EGTA, 50ug/ml RNase, 40ug/ml glycogen, 10pg/ml yeast  
945 spike-in DNA) to stop the reaction. Samples were incubated at 37°C for 10 minutes to release the  
946 DNA fragments. Samples were spun at 12,000g for 10 minutes and aqueous layer transferred to a  
947 fresh 1.5 ml microfuge tube and centrifuged at 16,000g for 5 minutes. Cleared liquid was again  
948 transferred to a fresh tube, 1µl of 20% SDS and 2.5µl proteinase K (20ng/ml) added, incubated at  
949 70°C for 10 minutes. 300µl PCI was added to each tube, mixed and total solution was transferred  
950 to phase lock tubes and centrifuged at 16,000g for 5 minutes. After adding 300µl of chloroform  
951 and mixing gently, samples were centrifuged at 16,000g for 5 minutes at RT. The aqueous layer  
952 was transferred to a DNA low binding tube. 1µl glycogen (5mg/ml) and 750µl ethanol added to  
953 precipitate DNA at -80°C. Samples were centrifuged at 16,000g for 10 min at 4°C and washed in  
954 ethanol twice. Pellet air dried and dissolved in 15µl of 1mM TrisHCl + 0.1mM EDTA pH 8.0<sup>46,47</sup>.  
955 1ng of Cut and Run DNA was used to make libraries using the KAPA Hyper prep kit and SeqCap  
956 adapters A & B (Roche) according to manufacturer's protocol. For library amplification, 14 cycles  
957 were used and a 1.0X SPRI bead cleanup was performed using Agencourt Ampure XP beads. The  
958 following antibody concentrations were used: rabbit anti-CLAMP (5µg/sample, SDIX); 1:200

959 anti-rabbit (MilliporeSigma); rat anti-MLE (1:50, 6E11); 700ng/ml pA-MNase (from Steven  
960 Henikoff).

961

962 *CUT&RUN in cell lines*: Cells were allowed to grow to confluency and harvested. Equal number  
963 of cells for each category suspended in wash buffer and subjected to Cut&Run assay according to  
964 Skene et al 2018<sup>47</sup> using rabbit anti-CLAMP (5µg) to immunoprecipitate CLAMP bound DNA  
965 fragments from male (S2) and female (Kc) cell lines. 3 replicates each for males and females were  
966 run, but during later stages one female sample was dropped due to insufficient starting material.  
967 Rabbit IgG was used as control, one for each male and female cell line sample. 1ng CUT&RUN  
968 DNA was used to generate libraries using Kapa Hyper prep kit (Roche, USA) and SeqCapAdapter  
969 Kit A (Roche, USA). 14 PCR cycles were used to amplify the libraries. AMPure XP beads  
970 (Beckman Coulter, USA) were used for library purification and fragment analysis was performed  
971 to check quality of the libraries made. Paired end 2x25 bp Illumina Hi-seq sequencing performed.

972

### 973 **RNA-sequencing**

974 *RNA-seq in cell lines*: 15ug each of *clamp* dsRNA and GFP dsRNA used for *clamp* RNAi and  
975 GFP RNAi (con), respectively per T25 flask. Cells (Kc and S2) incubated with dsRNA in FBS  
976 minus media for 45 minutes and allowed to grow in media supplemented with 10% FBS for 6 days  
977 before harvesting. dsRNA targeting *gfp* (control) and *clamp* for RNAi have been previously  
978 validated and described<sup>39,91</sup>. PCR products were used as a template to generate dsRNA using the T7  
979 Megascript kit (Ambion, Inc., USA), followed by purification with the Qiagen RNeasy kit  
980 (Qiagen, USA). RNA was harvested using Rneasy mini plus kit (Qiagen, USA). 2 ug of total RNA  
981 was used for the construction of sequencing libraries. RNA libraries for RNA-seq were prepared  
982 using Illumina TruSeq V2 mRNA-Seq Library Prep Kit following the manufacturer's protocols.  
983 Hi-seq paired end 100bp mRNA sequencing performed. Data was submitted to the GEO repository  
984 (#GSE220439). For gene expression analysis, the DESeq2 pipeline was used. For identifying  
985 CLAMP dependent splicing, our new time2splice pipeline was used.

986

987 *RNA-seq in third instar larvae (L3)*: Total RNA was extracted from control (*yw*) and *clamp* mutant  
988 (*yw, clamp*<sup>2</sup>) male and female third instar larvae (3 each) using Trizol (Invitrogen, USA).  
989 Messenger RNA was purified from total RNA using poly-T oligo-attached magnetic beads. After



990 fragmentation, the first strand cDNA was synthesized using random hexamer primers followed by  
991 the second strand cDNA synthesis. The library was ready after end repair, A-tailing, adapter  
992 ligation, size selection, amplification, and purification followed by paired-end RNA-sequencing  
993 in Illumina Novaseq 6000. The sequencing data was run through a SUPPA-based time2splice  
994 pipeline to identify CLAMP-dependent sex-specific splicing events. Data was submitted to the  
995 GEO repository (#GSE220455).

996

### 997 **iCLIP**

998 Cells were allowed to grow to confluency and UV crosslinked using 254nm UV light in  
999 Stratalinker 2400 on ice (Stratagene, USA). UV treated cells were lysed to get different cellular  
1000 fractions (Cytoplasmic, Nucleoplasmic and Chromatin) according to Fr-iCLIP (fractionation-  
1001 iCLIP) protocol from Brugiolo et al 2017<sup>42</sup>. Chromatin and Nucleoplasmic fractions were  
1002 sonicated with a Branson digital sonicator at 30% amplitude for 30 s total (10 sec on and 20 sec  
1003 off) to disrupt DNA before IP. All three fractions were separately centrifuged at 20,000 xg for 5  
1004 min at 4°C. Fractions were tested by Western blotting using RNAPolII for Chromatin Fraction,  
1005 Actin for Cytoplasmic Fraction. Protein quantification for each fraction was done using  
1006 manufacturer's protocol for Pierce 660nm protein assay reagent (Thermo Scientific, USA). Each  
1007 Fraction was subjected to iCLIP protocol as described in Huppertz et al 2014<sup>41</sup> using rabbit-  
1008 CLAMP antibody to immunoprecipitate bound RNAs which were extracted using proteinase K and  
1009 phenol:chloroform. Custom cDNA libraries prepared according to Huppertz et al 2014<sup>41</sup> using  
1010 distinct primers Rt1clip-Rt16clip for separate samples containing individual 4nt-barcode  
1011 sequences that allow multiplexing of samples. cDNA libraries for each sample amplified  
1012 separately using 31 cycles of PCR, mixed together later and sequenced using standard illumina  
1013 protocols. Heyl et al. 2020<sup>92</sup> methods using the Galaxy CLIP-Explorer were followed to  
1014 preprocess, perform quality control, post-process and perform peak calling.

1015

### 1016 **Computational Methods:**

1017

#### 1018 **Time2splice tool**

1019 Time2splice is a new pipeline to identify temporal and sex-specific alternative splicing from multi-  
1020 omics data that relies on the existing validated SUPPA method to identify differentially spliced

1021 isoforms (Trincado et al 2018). This pipeline combines SUPPA with several additional scripts to  
1022 identify sex-specifically spliced genes and sex-biased genes at different time points.

1023

1024 Importantly, these scripts are partitioned into separate script files to enable the user to use only the  
1025 scripts that they need for their analysis. Figure S1 describes the published methods and new scripts  
1026 which we used in our analysis. Where boxes are numbered, the output from each step can be used  
1027 as input for the subsequent step. **Step D** can be performed in any order depending on user needs.  
1028 You can also see the README here (<https://github.com/ashleymaeconard/time2splice>) for a  
1029 detailed description of the methods.

1030

### 1031 **a. Tutorial section for time2splice:**

1032 Preprocess (scripts/preprocess): Retrieve raw data, quality control, trimming, alignment. Perform  
1033 steps as needed.

1034 `1_parse_sraRunTable.sh`

1035 Creates `time2splice/` folder structure, as well  
1036 as `metadatafile.csv` and `SraAccList.txt` (which is needed for next command to get `.fastq`  
1037 files).

1038 `1_get_fastq_files.sh`

1039 Retrieves `.fastq` files by passing in `SraAccList.txt` from aforementioned step.

1040 `2_run_fastQC.sh`

1041 Runs FastQC for all `.fastq` files in a given directory.

1042 `3_run_trim_galore.sh`

1043 Run Trim Galore! followed by FastQC to trim any reads below quality threshold.

1044 `3_merge_lines.sh`

1045 Merges all the different lanes of the same flow cell `.fastq` files.

1046 `4_run_Bowtie2.sh` OR `preprocess/4_run_BWA.sh` OR `preprocess/4_run_HISAT2.sh`.

1047 Runs one or more of these three aligners (Bowtie2, BWA, or HISAT2) on `.fastq` data in a given  
1048 directory.

1049 `5_plot_alignment.py`

1050 Plot the alignments from either one or two different aligners (Bowtie2 or HISAT2).

1051 Temporal expression analysis (scripts/rna)

1052 `1_run_salmon.sh`

1053 Run salmon to quantify transcript expression for treatment and control samples.

1054 e.g. `./1_run_salmon.sh /nbu/compbio/aconard/larschan_data/sexed_embryo/`

1055 `/data/compbio/aconard/splicing/results/salmon_results_ncbi_trans/`

1056 /data/compbio/aconard/BDGP6/transcriptome\_dir/pub/infphilo/hisat2/data/bdgp6\_  
1057 tran/genome.fa 3 10 1 \_001.fastq.gz  
1058 2\_run\_suppa.sh  
1059 Run Suppa for treatment and control samples.

1060 e.g. ./2\_run\_suppa.sh /data/compbio/aconard/splicing/results/salmon\_results/  
1061 /data/compbio/aconard/splicing/results/suppa\_results\_ncbi\_trans/  
1062 /data/compbio/aconard/BDGP6/transcriptome\_dir/pub/infphilo/hisat2/data/bdgp6\_  
1063 tran/genome.fa 20  
1064 3\_suppa\_formatting.py  
1065 Converts NM\_gene names to flybase name, then merging outputs from run\_suppa (NM\_gene  
1066 names by 1 TPM value column for each replicate)

1067 4\_suppa.sh  
1068 Identifies various forms of differential splicing (e.g. using PSI and DTU)

1069 5\_calc\_total\_alt\_splicing\_controls.py  
1070 Calculate and plot the proportions of alternative splicing (in pie chart) in control samples.

1071 6\_calc\_total\_alt\_differential\_splicing.py  
1072 Calculate and plot the proportions of alternative splicing (in pie chart) in treatment samples.

1073 7\_get\_bias\_genes.py  
1074 Retrieve male and female biased genes and create bed files for average profile plotting.

1075 8\_plots\_splicing.ipynb  
1076 Plotting transcript expression using PSI and DTU measures.

1077 8\_alt\_plots\_splicing.ipynb  
1078 Alternative code base to plot transcript expression using PSI and DTU measures.

1079 9\_plots\_splicing\_time.ipynb  
1080 Plot alternative splicing genes within categories (all females, all males, females sex specific, male  
1081 sex specific, female all rest, male all rest, female non-sex specific, male non-sex specific, female  
1082 new sex specific, male new sex specific) over time.

1083 Temporal protein-DNA analysis (scripts/protein\_dna)

1084 1\_run\_picard\_markduplicates.sh  
1085 Run Picard's MarkDuplicates in for all .sorted.bam files in a given directory.

1086 2\_run\_mac2.sh  
1087 Runs MACS2 to call peaks for all .sorted.bam files in a given directory.

1088 3\_run\_mac2\_fold\_enrich.sh  
1089 Generate signal track using MACS2 to profile transcription factor modification enrichment levels  
1090 genome-wide.

1091 Temporal multi-omics integration (scripts/multio\_analysis)

1092 Note, there is no order to these scripts. Each analysis / results exploration is independent. More  
1093 analysis scripts to come.

1094 `overlap_protein_DNA_peaks.sh`

1095 Runs Intervene to view intersection of each narrowpeak file.

1096 `histogram_peak_val_intensity.ipynb`

1097 Plot peak intensity for a given narrow peak file.

1098 `get_coord_run_meme.sh`

1099 Get coordinates of bed file and run through MEME.

1100 `alt_splicing_chi_squared.ipynb`

1101 Perform chi-squared test on alternative splicing categories. Mutually Exclusive Exons (MXE) used  
1102 in this example.

### 1103 **b. Identification of sex-specifically splicing events:**

1104 We quantified the amount of alternative splicing using an exon-centric approach to quantify  
1105 individual splice junctions by measuring percent spliced in (PSI) for a particular exon using  
1106 SUPPA within time2splice.

1107  $PSI = IR \text{ (included reads)} / IR + ER \text{ (excluded reads)}$

1108

1109 The difference in PSI values ( $\Delta PSI$ ) between samples implies differential inclusion or exclusion  
1110 of alternative exons among the two sample types. For example, a positive  $\Delta PSI$  of 0.8 for an exon  
1111 skip event means the exon is included in 80% of transcripts in the sample whereas a negative  $\Delta PSI$   
1112 value implies reduced inclusion of the alternative exon. First, we determined significant  
1113 differences in  $\Delta PSI$  values for splicing events between the control female and male samples in 0-  
1114 2 hr embryo (**Fig S2A**) and 2-4 hr embryo (**Fig S2D**) samples to identify CLAMP-independent  
1115 sex-specific splicing differences between males and females. We have included volcano plots to  
1116 show how we defined significant differences with a p-value cutoff of  $p\text{-value} < 0.05$ . Next, we  
1117 determined the splicing events which are significantly affected by *clamp* RNAi in female and male  
1118 samples (**Fig S2B-C, E-F**). Lastly, we compared the lists of CLAMP-independent to CLAMP-  
1119 dependent sex-specific splicing events identify the following categories of splicing events: 1)  
1120 Splicing events that differ between wild type males and wild type females and are also dependent  
1121 on CLAMP; 2) CLAMP-dependent new sex-specific splicing events: Splicing events that were not

1122 different when comparing wild type males and wild type females but do show sex-specific  
1123 differences in the absence of CLAMP (**Fig 2B,C and Table S1**).

1124

### 1125 **c. Sex-specific splicing event analysis:**

1126 RNA sequencing data from Rieder et al 2017 (#GSE102922), Kc and S2 cell line and third instar  
1127 larval data generated by us were analyzed using time2splice to determine sex-specifically splicing  
1128 events. *dmel-all-r6.29.gtf* from BDGP6 in genomes<sup>93</sup> was used to map each transcript identifier  
1129 (ID) to gene ID and symbol, for .bed creation data for the associated chromosome, transcription  
1130 start site (TSS) and transcription end site (TES), and strand information were imported from  
1131 Illumina ([https://support.illumina.com/sequencing/sequencing\\_software/igenome.html](https://support.illumina.com/sequencing/sequencing_software/igenome.html)). From the  
1132 raw data after quality control i.e, FastQC<sup>94</sup>, Salmon<sup>95</sup> was used to quantify transcript expression  
1133 for treatment and control samples. Calculated transcripts per million (TPM) values from SUPPA<sup>26</sup>  
1134 were used for all four replicates of female and male controls at both time points (before and after  
1135 MZT). Each sample was filtered to include transcripts where the mean value is less than or equal  
1136 to 3 TPMs per gene. The number of transcripts included at various thresholds were plotted from 1  
1137 to 10 and the fraction of genes filtered out begins to plateau around threshold 3. The percent of  
1138 spliced in (PSI) transcripts between females and males were compared at both 0-2 Hr (pre-MZT)  
1139 and 2-4 Hr (post-MZT); Kc and S2 cells; and third instar larval stage, L3 (p-value of 0.05), thereby  
1140 resulting in delta PSI values and p-values for each transcription in each experimental condition  
1141 comparison. Given these resulting delta transcript PSI values, significantly alternatively splice  
1142 genes (p-value 0.05) were found between females vs. males 0-2 Hr (pre-MZT) controls to show  
1143 which genes are normally sex-specifically spliced pre-MZT. The same process was followed at 2-  
1144 4 Hr (post-MZT), in cell lines and third instar larvae. To then determine the sex-specifically spliced  
1145 genes, the female RNAi experiment compared with the control delta PSI gave the number of total  
1146 alternative spliced transcripts pre-MZT, then considering those that are not shared with males, and  
1147 are only expressed in females normally, this defined our sex specifically spliced set of genes for  
1148 females pre-MZT. This process was also performed for males pre-MZT, for post-MZT sample; for  
1149 S2 and Kc cell lines and for female and male L3.

1150

### 1151 **d. Gene ontology analysis:**

1152 Gene ontology (GO) analysis was performed using the R tool Clusterprofiler (Wu et al 2021).  
1153 Specifically, time2splice's script enrichment analysis. r implements GO analysis given an input  
1154 gene set as a .txt file with a new line delimiter between genes. Given this input, it is converted to  
1155 a vector of genes. The enrich GO function will return the enrichment GO categories after FDR  
1156 correction. The FDR correction used is Benjamini Hochberg to account for the expected proportion  
1157 of false positives among the variables (i.e. genes) for which we expect a difference. This was  
1158 chosen over other methods such as the common Bonferroni method, as the Bonferroni correction  
1159 controls the familywise error rate, where we are interested to account for false discoveries. The  
1160 actual over-representation test itself is implemented in enrich GO according to Yu et al 2015 where  
1161 they calculate a p-value using the hypergeometric distribution (Boyle et al 2011) and then perform  
1162 multiple hypothesis correction. Importantly, while there are many tools to perform GO analysis,  
1163 Cluster profiler was chosen due to its superior visuals and ability to handle multiple -omics types.  
1164 This thus enables diverse additional analyses to be integrated into time2splice in the future such  
1165 as ATAC-seq.

1166

### 1167 **ChIP-seq: Data analysis**

1168

1169 We used preprocessed ChIP-seq data from Rieder et al 2019 (#GSE133637), specifically the .bw  
1170 and .broadPeak.gz files in our analysis using ChIPseeker<sup>96</sup> and deeptools<sup>97</sup>. Specifically, when  
1171 plotting the average profiles using deeptools, we achieved a baseline signal representing genome-  
1172 wide binding taking into consideration the number of genes in other groups by the following  
1173 procedure: of all genes that are on (no zero read-count genes), we sampled the number of the  
1174 largest other group (to which we are comparing), and ran computeMatrix on that subset. This  
1175 process was repeated 500 times and the resulting 500 matrices were averaged to produce a  
1176 representative signal. For motif analysis MEME<sup>98</sup> suite was used.

1177

### 1178 **CUT&RUN: Data analysis**

1179

1180 Sequenced reads were run through FASTQC<sup>94</sup>(fastqc replicate\_R1\_001.fastq.gz  
1181 replicate\_R2\_001.fastq.gz) with default parameters to check the quality of raw sequence data and  
1182 filter out any sequences flagged for poor quality. Sequences were trimmed and reassessed for

1183 quality using TrimGalore (<https://github.com/FelixKrueger/TrimGalore/issues/25>) and FastQC <sup>94</sup>,  
1184 respectively. All Illumina lanes of the same flow cell. fastq files were merged, and sequenced reads  
1185 were then mapped to release 6 *Drosophila melanogaster* genome (dm6). We compared Bowtie2<sup>99</sup>,  
1186 HISAT2<sup>100</sup>, and BWA<sup>101</sup>. We found the best alignment quality with BWA and thus used this  
1187 method's results downstream. Next, we performed conversion to bam and sorting (e.g. using:  
1188 bowtie2 -x dm6\_genome -1 replicate\_R1\_001.fastq.gz -2 replicate\_R2\_001.fastq.gz -S out.sam >  
1189 stout.txt 2> alignment\_info.txt; samtools view -bS out.sam > out.bam; rm -rf out.sam; samtools  
1190 sort out.bam -o out.sorted.bam). We removed reads (using samtools) with a MAPQ less than 30  
1191 and any reads with PCR duplicate reads (identified using MarkDuplicates Picard -2.20.2). Peaks  
1192 identified using MACS2<sup>102</sup>( macs2 callpeak -t out.sorted.bam -B -f BAM --nomodel --SPMR --  
1193 keep-dup all -g dm --trackline -n outname --cutoff-analysis --call-summits -p 0.01 --outdir outdir)  
1194 and keep duplicates separate. To calculate fold-enrichment macs2 is run again (macs2 bdgcmp -t  
1195 \$treat -c \$control -o \$out.sorted.bam\_FE.bdg -m FE 2> \$ out.sorted.bam\_FE.log; macs2 bdgcmp  
1196 -t \$treat -c \$control -o \$out.sorted.bam\_logLR.bdg -m logLR -p 0.00001 2). For motif analysis  
1197 MEME <sup>98</sup> suite was used. Data submitted in GEO repository (#GSE174781, #GSE220981 and  
1198 #GSE220053).

1199

## 1200 **iCLIP: Data analysis**

1201

1202 The method from Heyl et al. 2020<sup>92</sup> using the Galaxy CLIP-Explorer were followed to preprocess,  
1203 perform quality control, post-process and perform peak calling. For preprocessing, UMI-Tools  
1204 was used, and then UMI-tools and Cutadapt were used for Adapter, Barcode and UMI-removal.  
1205 Cutadapt (Galaxy version 3.5) was used for filtering with a custom adapter sequence  
1206 AGATCGGAAGAGCGGTTCAGCAGGAATGCCGAGACCGATCTCGTATGCCGTCTTCT  
1207 GCTTG. All other settings followed the Heyl et al 2020 Galaxy iCLIP-explorer workflow. UMI-  
1208 Tools Extract (Galaxy Version 1.1.2+galaxy2) was then used with a barcode pattern of  
1209 NNNXXXNN. No unpaired reads were allowed. The barcode was on the 3' end. Je-Demultiplex  
1210 (Galaxy Version 1.2.1) was then used for demultiplexing. FastQC was used for quality control.  
1211 Mapping was done by RNA STAR (Galaxy version 2.5.2b-2) using dm6. All settings were chosen  
1212 based on the existing parameters from the iCLIP-explorer settings. We selected FALSE for the  
1213 option to use end-to-end read alignments with no soft-clipping. bedtools used for Read-Filtering,

1214 and UMI-Tools (Galaxy version 0.5.3.0) for de-duplication. PEAKachu was used for Peak Calling  
1215 to generate bed files. The PEAKachu settings were followed using the Galaxy CLIP-explorer  
1216 workflow. The maximum insert size was set to 150, the minimum cluster expression fraction was  
1217 set to 0.01, the minimum block overlap set to 0.5, the minimum block expression set to 0.1. The  
1218 Mad Multiplier was set to 0.0, the Fold Change Threshold was set to 2.0, and the adjusted p-value  
1219 threshold was set to 0.05. Peaks were annotated using RCAS<sup>103</sup> (RNA Centric Annotation System),  
1220 a R package using Rstudio. MEME Suite used for motif detection. RCAS was used for functional  
1221 analysis of the transcriptomes isolated by iCLIP, such as transcript features. ShinyGO 0.76<sup>104</sup> was  
1222 used to perform Gene Ontology Analysis of the iCLIP data. Data submitted in GEO repository  
1223 (#GSE205987).

1224

#### 1225 **a. Integrating CUT&RUN and iCLIP data:**

1226 A Python script was created that iterates through all of the DNA peak bed files for CLAMP DNA  
1227 binding sites in Kc and S2 cell lines (CUT&RUN data, #GSE220053) as a reference, and tests for  
1228 overlap with CLAMP-bound RNA peaks (each sequence is between 25-50bp in size) in the Kc  
1229 and S2 (iCLIP data, (#GSE205987). The overlaps are categorized into four main categories based  
1230 upon the location of the overlap: 1) completely overlapping (purple lines in frequency plot), 2)  
1231 partially overlapping at the DNA peak start site (red lines in frequency plot); 3) partially  
1232 overlapping at the DNA peak end site (blue lines in frequency plot) and 4) non-overlapping, i.e.  
1233 when there is an overlap in a region outside the DNA binding site (yellow lines in frequency plot).  
1234 This extended region is defined by the *scope* variable in the script, allowing the overlap to look for  
1235 binding sites in the proximity of the DNA binding site (this scope is 2 kb including the DNA  
1236 binding site). It should be noted that multiple RNA peaks can be found on one DNA peak. All of  
1237 these overlaps are placed onto a [-scope, scope] region. Then, each type of overlap shown with a  
1238 different color is overlaid and plotted onto a frequency plot. So, if the frequency at a given base  
1239 pair is 5, then there are five overlaps that contained that base pair within the region defined by the  
1240 scope.

1241

#### 1242 **b. Identifying RBP motif in iCLIP data:**

1243 The online tool cisBP-RNA database (cisbp-rna.cabr.utoronto.ca) was used to identify binding  
1244 motifs for six proteins in *Drosophila Melanogaster*, namely Sxl, Tra2, Hrb87F/hrp36,



1245 Hrb98DE/hrp38, Hrb27C, and Lark, within iCLIP data for CLAMP bound RNAs in S2 and Kc  
1246 cell chromatin and nucleoplasmic fractions. First, the RNA Binding Protein (RBP) information for  
1247 each protein was extracted from the database and placed in the cart using the search bar on the  
1248 home page. Then, the RNA Scan tool was run for all the RBPs in the cart to scan for the RBP  
1249 motifs in the list of CLAMP-bound RNA sequences, with the inputs of the FASTA sequence for  
1250 each fraction, the species set to *Drosophila melanogaster*, and the motif model used was PWMs  
1251 (Energy) with a threshold of 0.2. From there, the resulting CSV files were passed through a Python  
1252 script to count the number of CLAMP binding motifs per fraction that contained each protein.  
1253 Then, the frequency of binding sites for each RNA binding protein within each sample was plotted  
1254 as a fraction on separate graphs.

1255

### 1256 **Competing Interest Statement**

1257 The authors declare no conflicting interests.

1258

### 1259 **Acknowledgments**

1260 This work and funding to M.R. was supported by R35GM126994 to E.N.L. from NIH. A.M.C is  
1261 funded by the NSF Graduate Research Fellowship and CCMB, Brown University. We thank  
1262 Bloomington stock center for fly lines. We thank Leila Rieder for SD and Rsp<sup>s</sup> stocks, Peter Becker  
1263 for MSL2 and MLE antibodies, Steve Henikoff for pAMNase protein and spike-in DNA for Cut  
1264 and Run, and Daniel J McKay for sharing his Cut and Run protocol for tissues.

1265

### 1266 **Author Contributions**

1267 **M.R.**, **A.M.C.** and **E.N.L.** planned experiments, analyzed results and wrote the manuscript.  
1268 **A.M.C.** did all the computational analysis regarding time2splice pipeline. **M.R.** carried out the  
1269 experimental work and collected data for Cut and Run, iCLIP, Polytene squashes and IF, splicing  
1270 assays and IP. **J.U.** carried out mRNA-sequencing in cell lines, sex determination pathway splicing  
1271 assays and WB. **J.A.** analyzed the MLE cut and run data and performed mRNA-sequencing in L3.  
1272 **A.H.** analyzed the iCLIP-seq data. **P.M.** analyzed the cell line and third instar larval RNA-seq data  
1273 using time2splice pipeline to identify CLAMP dependent splicing events and integrated CLAMP  
1274 iCLIP data with CLAMP CUT&RUN in cell lines. **S.V.** did the motif analysis to identify motifs  
1275 for RBPs involved in splicing in CLAMP iCLIP data.

1276 **References**

- 1277 1. Horn, T., Gosliga, A., Li, C., Enculescu, M. & Legewie, S. Position-dependent effects of  
1278 RNA-binding proteins in the context of co-transcriptional splicing. *npj Systems Biology*  
1279 *and Applications* **9**, 1 (2023).
- 1280 2. Shukla, S. & Oberdoerffer, S. Co-transcriptional regulation of alternative pre-mRNA  
1281 splicing. *Biochimica et Biophysica Acta (BBA)-Gene Regulatory Mechanisms* **1819**, 673-  
1282 683 (2012).
- 1283 3. Bedi, K. *et al.* Cotranscriptional splicing efficiencies differ within genes and between cell  
1284 types. *RNA* **27**, 829-840 (2021).
- 1285 4. Gehring, N.H. & Roignant, J.-Y. Anything but ordinary—emerging splicing mechanisms in  
1286 eukaryotic gene regulation. *Trends in Genetics* **37**, 355-372 (2021).
- 1287 5. Herzel, L., Ottoz, D.S., Alpert, T. & Neugebauer, K.M. Splicing and transcription touch  
1288 base: co-transcriptional spliceosome assembly and function. *Nature reviews Molecular*  
1289 *cell biology* **18**, 637-650 (2017).
- 1290 6. Merkhofer, E.C., Hu, P. & Johnson, T.L. Introduction to cotranscriptional RNA splicing.  
1291 *Spliceosomal Pre-mRNA Splicing: Methods and Protocols*, 83-96 (2014).
- 1292 7. Zhang, S. *et al.* Structure of a transcribing RNA polymerase II–U1 snRNP complex.  
1293 *Science* **371**, 305-309 (2021).
- 1294 8. Fu, X.-D. & Ares Jr, M. Context-dependent control of alternative splicing by RNA-binding  
1295 proteins. *Nature Reviews Genetics* **15**, 689-701 (2014).
- 1296 9. Naftelberg, S., Schor, I.E., Ast, G. & Kornblihtt, A.R. Regulation of alternative splicing  
1297 through coupling with transcription and chromatin structure. *Annual review of*  
1298 *biochemistry* **84**, 165-198 (2015).
- 1299 10. Ji, X. *et al.* SR proteins collaborate with 7SK and promoter-associated nascent RNA to  
1300 release paused polymerase. *Cell* **153**, 855-868 (2013).
- 1301 11. Van Nostrand, E.L. *et al.* A large-scale binding and functional map of human RNA-binding  
1302 proteins. *Nature* **583**, 711-719 (2020).
- 1303 12. Brooks, A.N. *et al.* Regulation of alternative splicing in *Drosophila* by 56 RNA binding  
1304 proteins. *Genome research* **25**, 1771-1780 (2015).
- 1305 13. Schulz, K.N. *et al.* Zelda is differentially required for chromatin accessibility, transcription  
1306 factor binding, and gene expression in the early *Drosophila* embryo. *Genome research*  
1307 **25**, 1715-1726 (2015).
- 1308 14. Schulz, K.N. & Harrison, M.M. Mechanisms regulating zygotic genome activation. *Nature*  
1309 *Reviews Genetics* **20**, 221-234 (2019).
- 1310 15. Boumpas, P., Merabet, S. & Carnesecchi, J. Integrating transcription and splicing into cell  
1311 fate: transcription factors on the block. *Wiley Interdisciplinary Reviews: RNA*, e1752  
1312 (2022).
- 1313 16. Rieder, L.E. *et al.* Histone locus regulation by the *Drosophila* dosage compensation  
1314 adaptor protein CLAMP. *Genes & development* **31**, 1494-1508 (2017).
- 1315 17. Artieri, C.G. & Fraser, H.B. Transcript length mediates developmental timing of gene  
1316 expression across *Drosophila*. *Molecular biology and evolution* **31**, 2879-2889 (2014).

- 1317 18. De Renzis, S., Elemento, O., Tavazoie, S. & Wieschaus, E.F. Unmasking activation of the  
1318 zygotic genome using chromosomal deletions in the *Drosophila* embryo. *PLoS Biol* **5**,  
1319 e117 (2007).
- 1320 19. Guilgur, L.G. *et al.* Requirement for highly efficient pre-mRNA splicing during *Drosophila*  
1321 early embryonic development. *Elife* **3**, e02181 (2014).
- 1322 20. Förch, P. & Valcárcel, J. Splicing regulation in *Drosophila* sex determination. in  
1323 *Regulation of Alternative Splicing* 127-151 (Springer, 2003).
- 1324 21. Urban, J. *et al.* Enhanced chromatin accessibility of the dosage compensated *Drosophila*  
1325 male X-chromosome requires the CLAMP zinc finger protein. *PloS one* **12**, e0186855  
1326 (2017).
- 1327 22. Duan, J.E. *et al.* CLAMP and Zelda function together as pioneer transcription factors to  
1328 promote *Drosophila* zygotic genome activation. *bioRxiv* (2020).
- 1329 23. Urban, J.A., Urban, J.M., Kuzu, G. & Larschan, E.N. The *Drosophila* CLAMP protein  
1330 associates with diverse proteins on chromatin. *PloS one* **12**, e0189772 (2017).
- 1331 24. Kaye, E.G. *et al.* Differential occupancy of two GA-binding proteins promotes targeting  
1332 of the *drosophila* dosage compensation complex to the male X chromosome. *Cell*  
1333 *reports* **22**, 3227-3239 (2018).
- 1334 25. Quinn, J.J. *et al.* Rapid evolutionary turnover underlies conserved lncRNA–genome  
1335 interactions. *Genes & development* **30**, 191-207 (2016).
- 1336 26. Trincado, J.L. *et al.* SUPPA2: fast, accurate, and uncertainty-aware differential splicing  
1337 analysis across multiple conditions. *Genome biology* **19**, 1-11 (2018).
- 1338 27. Urban, J.A. *et al.* The essential *Drosophila* CLAMP protein differentially regulates non-  
1339 coding roX RNAs in male and females. *Chromosome Research* **25**, 101-113 (2017).
- 1340 28. Rieder, L.E., Jordan III, W.T. & Larschan, E.N. Targeting of the dosage-compensated male  
1341 X-chromosome during early *Drosophila* development. *Cell reports* **29**, 4268-4275. e2  
1342 (2019).
- 1343 29. Duan, J.E. *et al.* CLAMP and Zelda function together to promote *Drosophila* zygotic  
1344 genome activation. *elife* **10**, 2020.07. 15.205054 (2021).
- 1345 30. Atallah, J. & Lott, S.E. Evolution of maternal and zygotic mRNA complements in the early  
1346 *Drosophila* embryo. *PLoS genetics* **14**, e1007838 (2018).
- 1347 31. Kwasnieski, J.C., Orr-Weaver, T.L. & Bartel, D.P. Early genome activation in *Drosophila* is  
1348 extensive with an initial tendency for aborted transcripts and retained introns. *Genome*  
1349 *research* **29**, 1188-1197 (2019).
- 1350 32. Gutierrez-Perez, I. *et al.* Ecdysone-induced 3D chromatin reorganization involves active  
1351 enhancers bound by Pipsqueak and Polycomb. *Cell reports* **28**, 2715-2727. e5 (2019).
- 1352 33. Kidder, B.L., Hu, G. & Zhao, K. ChIP-Seq: technical considerations for obtaining high-  
1353 quality data. *Nature immunology* **12**, 918-922 (2011).
- 1354 34. Tsompana, M. & Buck, M.J. Chromatin accessibility: a window into the genome.  
1355 *Epigenetics & chromatin* **7**, 1-16 (2014).
- 1356 35. Cherbas, L. & Gong, L. Cell lines. *Methods* **68**, 74-81 (2014).
- 1357 36. Cherbas, L., Moss, R. & Cherbas, P. Transformation techniques for *Drosophila* cell lines.  
1358 *Methods in cell biology* **44**, 161-179 (1994).
- 1359 37. Alekseyenko, A.A. *et al.* A sequence motif within chromatin entry sites directs MSL  
1360 establishment on the *Drosophila* X chromosome. *Cell* **134**, 599-609 (2008).

- 1361 38. Straub, T., Zabel, A., Gilfillan, G.D., Feller, C. & Becker, P.B. Different chromatin  
1362 interfaces of the Drosophila dosage compensation complex revealed by high-shear ChIP-  
1363 seq. *Genome research* **23**, 473-485 (2013).
- 1364 39. Hamada, F.N., Park, P.J., Gordadze, P.R. & Kuroda, M.I. Global regulation of X  
1365 chromosomal genes by the MSL complex in Drosophila melanogaster. *Genes &*  
1366 *development* **19**, 2289-2294 (2005).
- 1367 40. Soruco, M.M. *et al.* The CLAMP protein links the MSL complex to the X chromosome  
1368 during Drosophila dosage compensation. *Genes & development* **27**, 1551-1556 (2013).
- 1369 41. Huppertz, I. *et al.* iCLIP: protein–RNA interactions at nucleotide resolution. *Methods* **65**,  
1370 274-287 (2014).
- 1371 42. Brugiolo, M., Botti, V., Liu, N., Müller-McNicoll, M. & Neugebauer, K.M. Fractionation  
1372 iCLIP detects persistent SR protein binding to conserved, retained introns in chromatin,  
1373 nucleoplasm and cytoplasm. *Nucleic acids research* **45**, 10452-10465 (2017).
- 1374 43. Harrison, A.F. & Shorter, J. RNA-binding proteins with prion-like domains in health and  
1375 disease. *Biochemical Journal* **474**, 1417-1438 (2017).
- 1376 44. March, Z.M., King, O.D. & Shorter, J. Prion-like domains as epigenetic regulators,  
1377 scaffolds for subcellular organization, and drivers of neurodegenerative disease. *Brain*  
1378 *research* **1647**, 9-18 (2016).
- 1379 45. Blanchette, M. *et al.* Genome-wide analysis of alternative pre-mRNA splicing and RNA-  
1380 binding specificities of the Drosophila hnRNP A/B family members. *Molecular cell* **33**,  
1381 438-449 (2009).
- 1382 46. Uyehara, C.M. & McKay, D.J. Direct and widespread role for the nuclear receptor EcR in  
1383 mediating the response to ecdysone in Drosophila. *Proceedings of the National*  
1384 *Academy of Sciences* **116**, 9893-9902 (2019).
- 1385 47. Skene, P.J., Henikoff, J.G. & Henikoff, S. Targeted in situ genome-wide profiling with high  
1386 efficiency for low cell numbers. *Nature protocols* **13**, 1006 (2018).
- 1387 48. Cugusi, S., Kallappagoudar, S., Ling, H. & Lucchesi, J.C. The Drosophila helicase maleless  
1388 (MLE) is implicated in functions distinct from its role in dosage compensation. *Molecular*  
1389 *& Cellular Proteomics* **14**, 1478-1488 (2015).
- 1390 49. Herold, N. *et al.* Conservation of the protein composition and electron microscopy  
1391 structure of Drosophila melanogaster and human spliceosomal complexes. *Molecular*  
1392 *and cellular biology* **29**, 281-301 (2009).
- 1393 50. Lindehell, H., Kim, M. & Larsson, J. Proximity ligation assays of protein and RNA  
1394 interactions in the male-specific lethal complex on Drosophila melanogaster polytene  
1395 chromosomes. *Chromosoma* **124**, 385-395 (2015).
- 1396 51. Albig, C. *et al.* Factor cooperation for chromosome discrimination in Drosophila. *Nucleic*  
1397 *acids research* **47**, 1706-1724 (2019).
- 1398 52. Quinn, J.J. *et al.* Revealing long noncoding RNA architecture and functions using domain-  
1399 specific chromatin isolation by RNA purification. *Nature biotechnology* **32**, 933-940  
1400 (2014).
- 1401 53. Gabellini, N. A polymorphic GT repeat from the human cardiac Na<sup>+</sup> Ca<sup>2+</sup> exchanger  
1402 intron 2 activates splicing. *European Journal of Biochemistry* **268**, 1076-1083 (2001).
- 1403 54. Hefferon, T.W., Groman, J.D., Yurk, C.E. & Cutting, G.R. A variable dinucleotide repeat in  
1404 the CFTR gene contributes to phenotype diversity by forming RNA secondary structures

- 1405 that alter splicing. *Proceedings of the National Academy of Sciences* **101**, 3504-3509  
1406 (2004).
- 1407 55. Lin, C.-L. *et al.* RNA structure replaces the need for U2AF2 in splicing. *Genome research*  
1408 **26**, 12-23 (2016).
- 1409 56. Hartmann, B. *et al.* Distinct regulatory programs establish widespread sex-specific  
1410 alternative splicing in *Drosophila melanogaster*. *Rna* **17**, 453-468 (2011).
- 1411 57. Salz, H. & Erickson, J.W. Sex determination in *Drosophila*: The view from the top. *Fly* **4**,  
1412 60-70 (2010).
- 1413 58. Bell, L.R., Horabin, J.I., Schedl, P. & Cline, T.W. Positive autoregulation of sex-lethal by  
1414 alternative splicing maintains the female determined state in *Drosophila*. *Cell* **65**, 229-  
1415 239 (1991).
- 1416 59. Moschall, R. *et al.* *Drosophila* Sister-of-Sex-lethal reinforces a male-specific gene  
1417 expression pattern by controlling Sex-lethal alternative splicing. *Nucleic acids research*  
1418 **47**, 2276-2288 (2019).
- 1419 60. Haussmann, I.U. *et al.* m6A potentiates Sxl alternative pre-mRNA splicing for robust  
1420 *Drosophila* sex determination. *Nature* **540**, 301-304 (2016).
- 1421 61. Moschall, R. (2019).
- 1422 62. Horabin, J.I. & Schedl, P. Splicing of the *Drosophila* Sex-lethal early transcripts involves  
1423 exon skipping that is independent of Sex-lethal protein. *Rna* **2**, 1-10 (1996).
- 1424 63. Medenbach, J., Seiler, M. & Hentze, M.W. Translational control via protein-regulated  
1425 upstream open reading frames. *Cell* **145**, 902-913 (2011).
- 1426 64. Wilkie, G.S., Dickson, K.S. & Gray, N.K. Regulation of mRNA translation by 5'- and 3'-UTR-  
1427 binding factors. *Trends in biochemical sciences* **28**, 182-188 (2003).
- 1428 65. Petrova, V. *et al.* Chromatin accessibility regulates intron retention in a cell type-specific  
1429 manner. *bioRxiv* (2021).
- 1430 66. Agirre, E., Oldfield, A., Bellora, N., Segelle, A. & Luco, R. Splicing-associated chromatin  
1431 signatures: a combinatorial and position-dependent role for histone marks in splicing  
1432 definition. *Nature communications* **12**, 1-16 (2021).
- 1433 67. Newman, A.J. The role of U5 snRNP in pre-mRNA splicing. *The EMBO journal* **16**, 5797-  
1434 5800 (1997).
- 1435 68. Graindorge, A., Carré, C. & Gebauer, F. Sex-lethal promotes nuclear retention of msl2  
1436 mRNA via interactions with the STAR protein HOW. *Genes & development* **27**, 1421-  
1437 1433 (2013).
- 1438 69. Lin, J.-C. *et al.* The impact of the RBM4-initiated splicing cascade on modulating the  
1439 carcinogenic signature of colorectal cancer cells. *Scientific reports* **7**, 1-11 (2017).
- 1440 70. Venables, J.P., Tazi, J. & Juge, F. Regulated functional alternative splicing in *Drosophila*.  
1441 *Nucleic acids research* **40**, 1-10 (2012).
- 1442 71. Blencowe, B.J. Alternative splicing: new insights from global analyses. *Cell* **126**, 37-47  
1443 (2006).
- 1444 72. Mayne, B.T. *et al.* Large scale gene expression meta-analysis reveals tissue-specific, sex-  
1445 biased gene expression in humans. *Frontiers in genetics* **7**, 183 (2016).
- 1446 73. Gibilisco, L., Zhou, Q., Mahajan, S. & Bachtrog, D. Alternative splicing within and  
1447 between *Drosophila* species, sexes, tissues, and developmental stages. *PLoS genetics* **12**,  
1448 e1006464 (2016).

- 1449 74. Revil, T., Gaffney, D., Dias, C., Majewski, J. & Jerome-Majewska, L.A. Alternative splicing  
1450 is frequent during early embryonic development in mouse. *BMC genomics* **11**, 399  
1451 (2010).
- 1452 75. Aanes, H. *et al.* Differential transcript isoform usage pre-and post-zygotic genome  
1453 activation in zebrafish. *BMC genomics* **14**, 331 (2013).
- 1454 76. Paris, M., Villalta, J.E., Eisen, M.B. & Lott, S.E. Sex bias and maternal contribution to gene  
1455 expression divergence in *Drosophila* blastoderm embryos. *PLoS Genet* **11**, e1005592  
1456 (2015).
- 1457 77. Telonis-Scott, M., Kopp, A., Wayne, M.L., Nuzhdin, S.V. & McIntyre, L.M. Sex-specific  
1458 splicing in *Drosophila*: widespread occurrence, tissue specificity and evolutionary  
1459 conservation. *Genetics* **181**, 421-434 (2009).
- 1460 78. Lott, S.E., Villalta, J.E., Zhou, Q., Bachtrog, D. & Eisen, M.B. Sex-specific embryonic gene  
1461 expression in species with newly evolved sex chromosomes. *PLoS Genet* **10**, e1004159  
1462 (2014).
- 1463 79. Ranz, J.M., Castillo-Davis, C.I., Meiklejohn, C.D. & Hartl, D.L. Sex-dependent gene  
1464 expression and evolution of the *Drosophila* transcriptome. *Science* **300**, 1742-1745  
1465 (2003).
- 1466 80. Zhang, Y., Sturgill, D., Parisi, M., Kumar, S. & Oliver, B. Constraint and turnover in sex-  
1467 biased gene expression in the genus *Drosophila*. *Nature* **450**, 233-237 (2007).
- 1468 81. Sun, X. *et al.* Sxl-Dependent, tra/tra2-Independent Alternative Splicing of the *Drosophila*  
1469 melanogaster X-Linked Gene found in neurons. *G3: Genes, Genomes, Genetics* **5**, 2865-  
1470 2874 (2015).
- 1471 82. Arbeitman, M.N., Fleming, A.A., Siegal, M.L., Null, B.H. & Baker, B.S. A genomic analysis  
1472 of *Drosophila* somatic sexual differentiation and its regulation. *Development* **131**, 2007-  
1473 2021 (2004).
- 1474 83. Bag, I., Dale, R.K., Palmer, C. & Lei, E.P. The zinc-finger protein CLAMP promotes gypsy  
1475 chromatin insulator function in *Drosophila*. *Journal of cell science* **132**(2019).
- 1476 84. Jordan, W. & Larschan, E. The zinc finger protein CLAMP promotes long-range chromatin  
1477 interactions that mediate dosage compensation of the *Drosophila* male X-chromosome.  
1478 *bioRxiv* (2020).
- 1479 85. Vernes, S.C. Genome wide identification of Fruitless targets suggests a role in  
1480 upregulating genes important for neural circuit formation. *Scientific Reports* **4**, 4412  
1481 (2014).
- 1482 86. Jai, Y.Y., Kanai, M.I., Demir, E., Jefferis, G.S. & Dickson, B.J. Cellular organization of the  
1483 neural circuit that drives *Drosophila* courtship behavior. *Current biology* **20**, 1602-1614  
1484 (2010).
- 1485 87. Henninger, J.E. *et al.* RNA-mediated feedback control of transcriptional condensates.  
1486 *Cell* **184**, 207-225. e24 (2021).
- 1487 88. Sharp, P.A., Chakraborty, A.K., Henninger, J.E. & Young, R.A. RNA in formation and  
1488 regulation of transcriptional condensates. *RNA* **28**, 52-57 (2022).
- 1489 89. Oksuz, O. *et al.* Transcription factors interact with RNA to regulate genes. *bioRxiv* (2022).
- 1490 90. Schneider, C.A., Rasband, W.S. & Eliceiri, K.W. NIH Image to ImageJ: 25 years of image  
1491 analysis. *Nature methods* **9**, 671-675 (2012).

- 1492 91. Larschan, E. *et al.* Identification of chromatin-associated regulators of MSL complex  
1493 targeting in *Drosophila* dosage compensation. *PLoS Genet* **8**, e1002830 (2012).  
1494 92. Heyl, F., Maticzka, D., Uhl, M. & Backofen, R. Galaxy CLIP-Explorer: a web server for  
1495 CLIP-Seq data analysis. *GigaScience* **9**, g1aa108 (2020).  
1496 93. DePristo, M.A. *et al.* A framework for variation discovery and genotyping using next-  
1497 generation DNA sequencing data. *Nature genetics* **43**, 491 (2011).  
1498 94. Andrews, S. FastQC: a quality control tool for high throughput sequence data.  
1499 (Babraham Bioinformatics, Babraham Institute, Cambridge, United Kingdom, 2010).  
1500 95. Patro, R., Duggal, G., Love, M.I., Irizarry, R.A. & Kingsford, C. Salmon provides fast and  
1501 bias-aware quantification of transcript expression. *Nature methods* **14**, 417-419 (2017).  
1502 96. Yu, G., Wang, L.-G. & He, Q.-Y. ChIPseeker: an R/Bioconductor package for ChIP peak  
1503 annotation, comparison and visualization. *Bioinformatics* **31**, 2382-2383 (2015).  
1504 97. Ramírez, F., Dündar, F., Diehl, S., Grüning, B.A. & Manke, T. deepTools: a flexible  
1505 platform for exploring deep-sequencing data. *Nucleic acids research* **42**, W187-W191  
1506 (2014).  
1507 98. Bailey, T.L., Johnson, J., Grant, C.E. & Noble, W.S. The MEME suite. *Nucleic acids*  
1508 *research* **43**, W39-W49 (2015).  
1509 99. Langmead, B. & Salzberg, S.L. Fast gapped-read alignment with Bowtie 2. *Nature*  
1510 *methods* **9**, 357 (2012).  
1511 100. Kim, D., Paggi, J.M., Park, C., Bennett, C. & Salzberg, S.L. Graph-based genome alignment  
1512 and genotyping with HISAT2 and HISAT-genotype. *Nature biotechnology* **37**, 907-915  
1513 (2019).  
1514 101. Li, H. & Durbin, R. Fast and accurate short read alignment with Burrows–Wheeler  
1515 transform. *bioinformatics* **25**, 1754-1760 (2009).  
1516 102. Zhang, Y. *et al.* Model-based analysis of ChIP-Seq (MACS). *Genome biology* **9**, 1-9 (2008).  
1517 103. Uyar, B. *et al.* RCAS: an RNA centric annotation system for transcriptome-wide regions  
1518 of interest. *Nucleic acids research* **45**, e91-e91 (2017).  
1519 104. Ge, S.X., Jung, D. & Yao, R. ShinyGO: a graphical gene-set enrichment tool for animals  
1520 and plants. *Bioinformatics* **36**, 2628-2629 (2020).  
1521  
1522  
1523  
1524  
1525  
1526  
1527  
1528  
1529  
1530  
1531

1532  
1533  
1534  
1535  
1536  
1537  
1538  
1539  
1540  
1541  
1542  
1543  
1544  
1545  
1546  
1547  
1548  
1549  
1550  
1551  
1552  
1553  
1554  
1555  
1556  
1557  
1558

**Figure legends**

**Fig 1. Alternative splicing during early *Drosophila melanogaster* embryonic development**

**A.** Schematic diagrams showing seven different types of Alternative splicing (AS). The constitutive exons are depicted as white rectangles, whereas the alternatively spliced exons are in shades of black and grey rectangles

**B.** Percentage of genes with alternative splicing in male and female early *Drosophila* embryos at the 0-2 Hr/pre-MZT and 2-4 Hr/post-MZT stages.

**C.** Table showing the number of exons in each AS category in control sexed embryos at the 0-2 Hr/pre-MZT and 2-4 Hr/post-MZT stages.

**D.** Bar plot showing the distribution of different types of AS at 0-2 Hr/pre-MZT and 2-4 Hr/ post-MZT for female and male embryos in the presence (*MTDGAL4>UAS-GFPRNAi*) and absence (*MTDGAL4>UAS-CLAMP RNAi*) of maternal CLAMP. A Chi-square test was performed to determine if there is a significant difference between the percentage of each type of AS including MXE splicing (black bar) in the presence vs. absence of CLAMP in each class of sample: female and male 0-2 Hr/pre-MZT, and 2-4 Hr/post-MZT embryos. Statistically significant differences ( $p < 0.001$  marked by \*\*\*) were found between categories connected by solid black lines.

**Fig 2. Maternal CLAMP regulates sex-specific alternative splicing during early embryonic development.**

**A.** Bar graph showing the percentage of transcripts (raw values noted at the top of each bar) compared with total AS events or sex-specific splicing (SSS) events within parentheses listed at



1563 the top of each bar: number of splicing events regulated by CLAMP/Total number of splicing  
1564 events. We quantified transcripts whose splicing is regulated by maternal CLAMP at the 0-  
1565 2Hr/pre-MZT and 2-4Hr/post-MZT stages in females (red bars) and males (blue bars). A Fisher's  
1566 Exact Test was performed with significance shown at  $p < 0.001$ .

1567 **B.** Bar plot showing the total number of splicing events undergoing CLAMP-dependent AS (N) in  
1568 females and males at 0-2 Hr/pre-MZT and 2-4 Hr/post-MZT embryonic stages. Alternatively,  
1569 spliced genes are divided into non-sex-specific (grey) and sex-specific (orange shades) sub-  
1570 categories. CLAMP-dependent female and male sex-specifically spliced (SSS) genes are divided  
1571 into known (sex-specific in control samples: darker orange) and new (sex-specific only after  
1572 depleting CLAMP: lighter orange) sub-categories identified from 0-2 Hr/pre-MZT and 2-4 Hr  
1573 post-MZT /embryos.

1574 **C.** Percentage of **new** female (red) and male (blue) CLAMP-dependent sex-specifically spliced  
1575 genes in 0-2 Hr/pre-MZT and 2-4 Hr/post-MZT embryos that were not identified as different  
1576 between males and females in control samples.

1577 **D.** Female (red) and male (blue) CLAMP-dependent sex-specific spliced genes compared with  
1578 maternal genes (green, NC9-10 stage,  $N=3525$ ; Syncytial Blastoderm stage,  $N=2644$ ; Cellular  
1579 Blastoderm stage,  $N=48$ ) at 0-2 Hr/pre-MZT (female,  $N=119$  and male,  $N=98$ ) and 2-4 Hr/ post-  
1580 MZT stages (female,  $N=207$  and male,  $N=106$ ).

1581 **E.** Gene Ontology (GO) results for genes showing CLAMP-dependent female sex-specific splicing  
1582 in embryos at the 0-2 Hr/pre-MZT stage and for genes exhibiting CLAMP-dependent female and  
1583 male sex-specific splicing in embryos at the 2-4 Hr/post-MZT stage. The size of the circle increases  
1584 as the number of genes in that category increases. The color of the circle represents significance  
1585 (p-value). GO categories for male embryos at the 0-2 Hr/pre-MZT stage are not shown because  
1586 the gene set is small and therefore no enriched GO categories were identified.

1587

1588

1589 **Fig 3. CLAMP binds along the gene body of female and male sex-specifically spliced genes**  
1590 **at the post-MZT embryonic stage**

1591 **A-D** Average profiles for CLAMP binding at pre-MZT and post-MZT embryonic stages in females  
1592 (**A, C**) and males (**B, D**) for genes **spliced** female-specifically (red line) and male-specifically  
1593 (blue line) during the pre-MZT (**A, B**) and post-MZT (**C, D**) stages.

1594 **E-H** Average profiles for CLAMP binding to genes **expressed** in a sex-biased manner in females  
1595 (red line) and males (blue line) during pre-MZT (**E, F**) and post-MZT (**G, H**) stage.  
1596 Green lines in **A-H** represent CLAMP binding at a random set of active genes used as a control  
1597 (see **Material and Methods** for details). Stippled regions in **A, C** (female, 0-2 Hr pre-MZT) denote  
1598 chromatin around the TSS with more CLAMP binding in female sex-specifically spliced genes vs.  
1599 male sex-specifically spliced genes. The dotted boxes in **A-H** highlight the gene body regions in  
1600 CLAMP-dependent sex-specifically spliced genes and genes with CLAMP-dependent sex-biased  
1601 expression.

1602

1603

1604 **Fig 4. CLAMP binds to specific RNA transcripts on chromatin in males and females**

1605 **A.** Venn diagrams showing distribution of CLAMP RNA targets between male and female cell  
1606 types and between chromatin and nucleoplasm fractions (**Four replicates** for each category  
1607 performed except **3 replicates** for the Kc nucleoplasm fraction).

1608 **B.** Bar plots showing the percentage distribution of CLAMP RNA targets into different RNA  
1609 categories in male (**S2**) and female (**Kc**) cell lines. The snRNAs, part of spliceosome complex is  
1610 marked by asterisk on the x-axis.

1611 **C.** Venn diagrams showing distribution of CLAMP snRNA targets between male and female cell  
1612 types in chromatin and nucleoplasm fractions. The corresponding bar plots denote the total number  
1613 of snRNAs CLAMP binds to in respective fractions and cell types.

1614 **D.** Bar plots showing number of CLAMP RNA binding peaks overlapping with CLAMP DNA  
1615 binding peaks in males (**blue bar**) and females (**red bar**).

1616 **E.** Frequency distribution of CLAMP RNA binding peaks (**iCLIP data, four replicates**) plotted  
1617 over a region spanning CLAMP DNA binding peaks (**CUT&RUN data, 3 replicates for S2, 2**  
1618 **replicates for Kc**). Complete overlaps are denoted by magenta, non-overlaps in yellow, partial  
1619 overlaps in red (near starting boundary of DNA peaks) and blue (near ending boundary of DNA  
1620 peaks).

1621

1622

1623 **Fig 5. CLAMP regulates the distribution of MLE on chromatin in males**

1624 **A-B.** Heat maps showing the distribution of MLE at the male-specific (**A**) and female-specific (**B**)  
1625 control MLE peaks on the X-chromosome and autosomes in male and female 0-2 Hr/pre-MZT  
1626 embryos in the presence of maternal CLAMP (*MTD-GAL4>GFP RNAi*) and after the loss of  
1627 maternal CLAMP (*MTD-GAL4>CLAMP RNAi*).

1628 **C-D.** Venn diagrams and bar plots showing loss and gain of MLE peaks in the presence and  
1629 absence of maternal CLAMP in male 0-2 Hr/pre-MZT (**B**) and 2-4 Hr/post-MZT (**C**) embryos.  
1630 CLAMP peaks were identified only under control conditions (green circle), whereas MLE peaks  
1631 were identified in the presence (grey circle) and absence (red circle) of maternal CLAMP protein  
1632 depleted using the *MTD-GAL4>CLAMP RNAi* system.

1633

1634

1635 **Fig 6. Alternative splicing of components of the sex determination pathway is regulated by**  
1636 **maternal CLAMP in females**

1637 **A.** The sex determination pathway in *Drosophila* is regulated by master regulator Sex Lethal  
1638 (SXL).

1639 **B.** RT-PCR electrophoresis gel images (inverted colors) showing splicing of *sxl* transcripts in 0-2  
1640 and 2-4 Hr sexed embryos in the presence and absence of maternal CLAMP with a representative  
1641 schematic of the splicing event at the top of the gel image. The arrow indicates the male-specific  
1642 *sxl* transcript. (**Number of replicates=2**)

1643 **C.** IGV browser image showing CLAMP ChIP-seq peaks (rectangular boxes in light blue) at the  
1644 genomic locus for the *sxl* gene in male and female 3Hr embryos. For each sample, the narrow peak  
1645 file is shown which is generated after peak calling.

1646 **D-E.** RT-PCR electrophoresis gel images from 0-2 Hr embryonic RNA samples (lane 2-5 & 7-10)  
1647 showing splicing of *dsx* (**D**) and *msl2* (**E**) transcripts in females (lanes 3,5,8,10) and males (lanes  
1648 2,4,7,9). Embryos were laid by *MTD-GAL4>GFP RNAi* control (lanes 4,5,9,10) and *MTD-*  
1649 *GAL4>CLAMP RNAi* (lanes 2,3,7,8) females. The schematic above each gel image shows the  
1650 female and male splice variants of the *dsx* (**D**) and *msl2* (**E**) transcripts.

1651

1652

1653 **Fig 7. Mechanisms by which CLAMP regulates sex-specific splicing in females and males**

1654 **A.** CLAMP regulates splicing in both males and females via directly binding to intronic DNA  
1655 sequences of CLAMP-dependent sex-specifically spliced genes and sex-specific interaction with  
1656 a subset of sex-specifically spliced RNAs and sex-specific interaction with spliceosomal RNAs.  
1657 **B.** CLAMP may regulate the distribution of MLE between the spliceosome and the male X-  
1658 chromosome specific MSL complex in males. CLAMP increases the occupancy of MLE at  
1659 promoters and CES. In the absence of CLAMP, MLE is lost from many of its binding sites,  
1660 including CES and promoters, and is gained at ectopic intronic sequences which contain motifs  
1661 that regulate splicing which correlates with aberrant sex-specific splicing in males.  
1662 **C.** In females, CLAMP binds near the SxlPe promoter and regulates chromatin accessibility at  
1663 exon three (blue square) of the *sxl* gene and binds to the *sxl* mRNA. In this way, CLAMP promotes  
1664 the excision of exon3 such that functional Sxl protein is formed, which drives female-specific  
1665 splicing events. The absence of CLAMP in females thus results in the aberrant production of non-  
1666 functional male-specific *sxl* transcripts which retain exon3, reducing levels of functional Sxl  
1667 protein. CLAMP also binds to the 5'UTR of the *sxl* RNA which may regulate its export or  
1668 translation. CLAMP and Sxl have shared and distinct RNA targets suggesting that they function  
1669 by both dependent and independent mechanisms.  
1670 The three mechanisms proposed in parts **A**, **B**, and **C** are not mutually exclusive and are likely to  
1671 occur simultaneously.

1672  
1673

1674 **Fig S1. Schematic diagram describing each step-in sequential order performed by the**  
1675 **time2splice pipeline.**

1676  
1677

1678 **Fig S2. Sex-specific differences in alternative splicing in early *Drosophila***  
1679 ***melanogaster* embryos**

1680 **A-F** Volcano plots showing  $\log_{10}$  pvalues for significant differences between PSI values for  
1681 splicing events at early embryonic stages in female and male embryos 0-2 Hr (**A**, **C**, **E**) and 2-4  
1682 Hr (**B**, **D**, **F**). Significant changes are labeled as blue dots ( $p < 0.05$  and PSI minimum  $\pm 0.2$ ). For  
1683 example, PSI of +0.8 means 80% of the transcripts retained the exon, while negative PSI values  
1684 mean reduced inclusion of the alternative exon.

1685  
1686

1687 **Fig S3. CLAMP inhibits aberrant alternative splicing in post-MZT male embryos**

1688 Box plot showing  $\Delta$ PSI values for **known** (different between females and males in control  
1689 samples) and **new** (not different in males and females in control samples) CLAMP-dependent sex-  
1690 specific spliced events at 0-2Hr/pre-MZT and 2-4Hr/post-MZT female and male embryos. **N**  
1691 denotes the total number of splicing events in each category, and p-values for groups showing  
1692 significant differences are noted at the bottom of the line connecting the compared groups.

1693

1694

1695 **Fig S4. Validation of splicing differences at randomly chosen target genes where CLAMP**  
1696 **regulates sex-specific splicing by RT-PCR and qRT-PCR.**

1697 **A-C.** Schematic showing alternative splicing events resulting in different isoforms of the same  
1698 gene which are regulated by CLAMP and the position of primers (dotted arrows) used to detect  
1699 these isoforms in RT-PCR assays.

1700 **D-F.** Inverted agarose electrophoretic gel images show the expression level of each isoform  
1701 detected using primers in the RT-PCR assays noted in **A-C** in male (**M**) and female (**F**) early  
1702 embryos under control *GFPRNAi* as well as *CLAMPRNAi* conditions.

1703 **G-I.** Bar plots showing the change in levels of specific isoforms resulting from alternative splicing  
1704 events in male (**blue**) and female (**red**) early embryos under control *GFPRNAi* (deeper shade of  
1705 blue and red) and *CLAMPRNAi* (lighter shade of blue and red) conditions. The isoform transcript  
1706 levels are normalized by the levels of *gapdh* housekeeping gene transcript. p-values (paired  
1707 student's t-test) for groups showing significant differences (\*) are noted at the top of the line  
1708 connecting the compared groups (**four replicates for each gene**).

1709 **J-M.** Schematic showing alternative splicing events resulting in different isoforms of the same  
1710 gene which are regulated by CLAMP and the position of primers (dotted arrows) used to detect  
1711 these isoforms by qRT-PCR analysis.

1712 **N-R.** Bar plot showing fold changes in transcript levels of the isoform detected using primers  
1713 shown in **J-M** of respective genes by qRT-PCR (**three replicates**) in the *MTD-*  
1714 *GAL4>CLAMPRNAi* genotype when compared to the control (*MTD-GAL4>GFPRNAi*) genotype,  
1715 in 0-2 Hr/pre-MZT and 2-4 Hr/post-MZT sexed embryos. Fold changes for each transcript differ  
1716 significantly between males (**blue**) and females (**red**) ( $p \leq 0.05$ , Student t-test).

1717

1718

1719 **Fig S5. CLAMP has context specific dual role in splicing and transcription at specific**  
1720 **genomic loci**

1721 **A-B.** Venn diagram showing overlap between CLAMP dependent spliced genes with CLAMP-  
1722 dependent differentially expressed genes in third instar larvae (A) and 0-4 Hr Embryo (B). The  
1723 total number of genes in each category is shown in the bar plot below the Venn diagram.

1724 **C.** Volcano plot showing  $\log_{10}$  p-values for significant differences between PSI values for splicing  
1725 events in female (Kc) and male (S2) *Drosophila* embryonic cell lines. Significantly changed  
1726 splicing events (N=615) are labeled as blue dots ( $p < 0.05$  and PSI minimum  $\pm 0.2$ ).

1727 **D.** Venn diagram showing overlaps between dependent spliced genes in Kc (female) cells (pink  
1728 circle) and S2 (male) cells (deep blue circle) with CLAMP dependent differentially expressed  
1729 genes in Kc (orange circle) and S2 cell lines (light blue circle). Bar plot shows the total number of  
1730 genes in each category.

1731 **E.** Volcano plots showing differential gene expression in Kc (female) and S2 (male) cell lines after  
1732 *clamp* RNAi compared to control (*GFP* RNAi).

1733

1734

1735 **Fig S6. CLAMP binds to chromatin near splice junctions**

1736 **A-D.** Notched box plots representing distance between **CLAMP peaks** in sex-specifically spliced  
1737 and sex-biased genes with the nearest splice junction in female (**A, C**) and male (**B, D**) 0-2 Hr (**A,**  
1738 **B**) and 2-4 Hr (**C, D**) embryos. p-values (Mann-Whitney test) for each group are noted at the top  
1739 and those with significant differences and the compared groups are connected with a solid black  
1740 line with an asterisk at the top \*. t-tests and KS-tests were also performed and showed the same  
1741 results.

1742 **E-H.** Notched box plots representing distance between **CLAMP peaks in introns** of the sex-  
1743 specifically spliced and sex-biased genes and the nearest splice junction in female (**E, G**) and male  
1744 (**F, H**) 0-2 Hr (**E, F**) and 2-4 Hr (**G, H**) embryos. p-values (Mann-Whitney test) for each group are  
1745 noted at the top for those with significant differences and the compared groups are connected with  
1746 a solid black line with an asterisk at the top \*. t-test and KS-test were also performed and showed  
1747 the same results.

1748

1749

1750 **Fig S7. CLAMP regulates splicing both indirectly as well as directly in *Drosophila* embryonic**  
1751 **cell lines**

1752 **A.** Venn diagram showing overlaps between CLAMP RNA targets in S2 (male) cells (violet circle)  
1753 and Kc (female) cells (deep pink circle) with genes differentially spliced (**N=452**) between Kc and  
1754 S2 cell lines (green circle). Bar plot shows the total number of genes in each category.

1755 **B.** Venn diagram showing overlap between CLAMP iCLIP RNA targets in S2 (male) cells (violet  
1756 circle) and Kc (female) cells (deep pink circle) with CLAMP-dependent spliced genes in S2  
1757 (turquoise blue) and Kc (light pink circle) cells. The total number of genes in each category is  
1758 shown in the bar plot below the Venn diagram.

1759

1760

1761 **Fig S8. MLE binds to different motifs and to different chromatin regions when colocalizing**  
1762 **with CLAMP compared to its unique binding sites that lack CLAMP.**

1763 **A-D** Bar plots show the distribution of MLE peak percent overlap with CLAMP peaks and unique  
1764 MLE peaks at different types of genomic regions: 1) **Pro**=Promoter; 2) **ID**=Immediate  
1765 downstream; 3) **5UTR**=5' untranslated region; 4) **3UTR**= 3' untranslated region; 5) **Exon**; 6)  
1766 **Intron**; and 7) **IGR**=Intergenic region. MLE distribution was measured on the X-chromosome (**A**,  
1767 **C**) and autosomes (**B**, **D**) in male embryos at 0-2Hr/pre-MZT (**A**, **B**) and 2-4Hr/post-MZT (**C**, **D**)  
1768 stages under normal conditions and after the loss of maternal CLAMP. 'N' denotes the total  
1769 number of peaks in each category. The most frequently identified sequence motif (MEME) for  
1770 MLE peaks overlapping with CLAMP and unique MLE peaks in each category is shown at the top  
1771 of the relevant bar plot.

1772 Venn diagrams in **A-D** compare CLAMP peaks in control (green circle) with MLE peaks in control  
1773 (grey circle) to determine the overlapping peaks (intersection between the two) and unique MLE  
1774 peaks. The red circle denotes MLE peaks that are present in absence of maternal CLAMP. The  
1775 MLE peaks lost in absence of maternal CLAMP (exclusively grey area) and gained (exclusively  
1776 red area).

1777

1778

1779 **Fig S9. MLE binding at CLAMP-dependent sex-specifically spliced genes. A-B.** Average  
1780 profile for MLE over the gene bodies of CLAMP-dependent male (**blue line**) and female (**red line**)

1781 sex specifically spliced genes in 0-2 Hr pre-MZT (**G**) and 2-4 Hr post-MZT (**H**) male embryos  
1782 under normal condition (**top**) and after the loss of maternal CLAMP (**bottom**). A set of random  
1783 active genes were used as a control (**green line**). **TSS**=Transcription start site and **TES**=  
1784 Transcription end site. The rectangular box with dashed lines in panel **H** shows that *CLAMP* RNAi  
1785 increases binding of MLE to female sex-specifically spliced genes (**red line**) compared to male  
1786 sex-specifically spliced genes (**blue line**) compared to control RNAi.

1787

1788

1789 **Fig S10. CLAMP sex-specifically interacts with components of the spliceosome complex**

1790 **A-B.** Western blot for Squid (hrp40, **A**) and Hrb27C (hrp48, **B**) in nuclear protein fractions from  
1791 Kc (female) and S2 (male) cells subjected to IP (Immunoprecipitation) using rabbit anti-CLAMP.  
1792 Rabbit IgG was used as control (lane 4, **A**, and lanes 1&2, **B**).

1793 **C.** Fluorescent microscopy images show the distribution of Squid (white) on chromatin (grey) in  
1794 polytene chromosome preparations from third instar larval salivary glands. The dotted white line  
1795 indicates the X-chromosome.

1796 **D.** Bar plot showing the average intensity of Squid immunostaining on female (red) and male  
1797 (blue) X-chromosomes. Intensities of Squid immunostaining at different genomic locations of the  
1798 X-chromosome were summed and divided by number of genomic locations to obtain an average  
1799 intensity (data obtained using plot profile in Fiji) (**N=5**)

1800 **E.** The mean intensity profile for Squid along a portion of the female (red) and male (blue) X-  
1801 chromosome polytene spread (**N=5**).

1802

1803

1804 **Fig S11. Alternative splicing of components of the sex determination pathway is regulated**  
1805 **by zygotic CLAMP in females**

1806 **A.** Electrophoresis gel image (inverted colors) showing splicing of *sxl* transcripts in third instar  
1807 larvae of females and males of genotypes listed in the key (a-g) with a representative schematic at  
1808 the top of the gel image.

1809 **B.** Western blot showing the level of Sxl protein in genotypes (3 replicates for each) mentioned  
1810 below each lane. Tubulin levels were used as a protein loading control. Below the blot is the



1811 relative quantification of Sxl protein levels compared with Tubulin and each genotype is  
1812 represented by separately colored bars.

1813 **C.** BLAST alignment showing CLAMP binding at the 5'UTR regions of *sxl* transcripts from iCLIP  
1814 data.

1815 **D.** Western blot for CLAMP in cytoplasmic and nuclear protein fractions from Kc (female) and  
1816 S2 (male) cells after IP (immunoprecipitation) using mouse anti-FMRP. IgG-mouse was used as  
1817 negative control (lanes 4, 5 and lanes 11 & 12).

1818 **E** IGV browser screenshot showing CLAMP peaks (rectangular boxes in light blue) at the genomic  
1819 locus for the *sxl* gene in male and female cell lines. For each category, the narrow peak file is  
1820 shown.

1821 **F.** Chromatin accessibility measured by the MNase Accessibility (MACC) score is shown across  
1822 the *sxl* gene in male (S2) and female (Kc) cells under control and *clamp* RNAi conditions. The  
1823 MACC score is a previously reported (Urban et al. 2017) quantification of chromatin accessibility  
1824 at each locus in the genome. Positive accessibility values (blue) indicate high chromatin  
1825 accessibility, and negative (red) accessibility values indicate low chromatin accessibility. Each  
1826 window covers MACC values ranging from -0.333 to +1.33. MACC values increase in females  
1827 after *clamp* RNAi, specifically at exon 3 (red box), and are shown in the inset to the right. Green  
1828 boxes represent CLAMP binding peaks in the *sxl* gene just below the schematic for the *sxl* gene  
1829 itself.

1830 **G-H.** Electrophoresis gel image from third instar larval samples (a-g) showing splicing of *dsx* (**G**)  
1831 and *msl2* (**H**) transcripts in females (lane sa-d) and males (lanes e-g). a-g genotypes are the same  
1832 as in panel A. The schematics at the top of each gel image show female and male splice variants  
1833 of *dsx* (**G**) and *msl2* (**H**) transcripts.

1834 **I.** Fluorescent microscopy images of polytene chromosomes from the third instar salivary gland in  
1835 the genotypes listed to the left of each panel (heterozygous control and *clamp*<sup>2</sup> null) show the  
1836 distribution of CLAMP (green) and MSL2 (red) on chromatin (blue, DAPI).

1837

1838

1839 **Fig S12. CLAMP and Sxl have common and independent RNA targets**

1840 **A.** Bar plots showing the percentage of CLAMP RNA targets that contain the Sxl RNA-binding  
1841 motif in male and female nuclear fractions.

1842 **B.** Venn diagrams comparing CLAMP RNA targets between male and female *Drosophila* cell  
1843 lines and between Sxl RNA targets identified previously in the adult *Drosophila* female head.

1844 **C.** Bar plots showing the percentage of CLAMP male (**blue**) and female (**red**) iCLIP targets that  
1845 are also Sxl iCLIP targets.

1846 **D.** Venn diagram comparing CLAMP-dependent spliced genes in early embryos (0-4 Hr) with  
1847 iCLIP RNA targets of CLAMP and Sxl. The total number of CLAMP-dependent spliced genes in  
1848 early embryos which are also direct iCLIP RNA targets for CLAMP (red) and Sxl (green) is shown  
1849 in the corresponding bar plots.

1850 **E-F** IGV browser screen shot showing CLAMP peaks (rectangular boxes in light blue) at the  
1851 genomic locus for the *dsx* (**E**) and *msl-2* (**F**) genes in male and female 0-2 Hr/pre-MZT and 2-4Hr/  
1852 post-MZT embryos. The bigwig file (upper track) and the corresponding narrow peak file (lower  
1853 track) are both shown.

1854

1855

1856 **Fig S13. Multiple RNA binding proteins involved in splicing have target motifs in CLAMP**  
1857 **bound RNA.**

1858 Bar plots showing the percentage of iCLIP CLAMP RNA targets in the S2 cell chromatin fraction  
1859 (**N=645**), S2 cell nucleoplasmic fraction (**N=53**), Kc cell chromatin fraction (**N=203**) and Kc cell  
1860 nucleoplasmic fraction (**N=119**) which have RNA binding sequence motifs for other RNA binding  
1861 proteins involved in alternative splicing (noted along the x-axis).

1862

1863

1864

1865

1866

1867

1868

1869

1870

1871

1872

1873

1874

1875

1876 **Table legends**

1877

1878 **Table S1:** List of CLAMP dependent sex-specific splicing events

1879

1880 **Table S2:** Summarizing the results and functions of the validated target genes at which splicing is  
1881 regulated by CLAMP

1882

1883 **Table S3:** List of all and sex-specific splicing events regulated by CLAMP in *Drosophila* third  
1884 instar larvae (L3) and which of them are direct CLAMP targets.

1885

1886 **Table S4:** List of all CLAMP dependent differentially expressed genes in *Drosophila* male and  
1887 female third instar larvae (L3)

1888

1889 **Table S5:** List of a) Differential splicing events between Kc (female) and S2 (male) cell lines and  
1890 which of them are direct CLAMP RNA targets, b) All CLAMP dependent splicing events in  
1891 *Drosophila* sexed embryonic cell lines, c) CLAMP dependent female and male specific-splicing  
1892 events in *Drosophila* sexed embryonic cell lines and which of them are direct CLAMP targets.

1893

1894 **Table S6:** List of CLAMP dependent spliced genes which are directly bound by CLAMP, list of  
1895 sex-specifically spliced genes and sex-biasedly expressed genes in 0-2 and 2-4 Hr male and female  
1896 Pre-MZT and Post-MZT embryos, respectively.

1897

1898

1899 **Table S7:** CLAMP RNA targets identified in the nuclear fractions of male (S2) and female (Kc)  
1900 cells. List of CLAMP dependent spliced genes which are direct CLAMP RNA targets.

1901

1902 **Table S8:** List of common RNA targets of CLAMP and SXL.

1903

1904 **Table S9:** List of CLAMP dependent male and female specifically spliced genes which are direct  
1905 SXL targets.

1906

1907 **Table S10:** List of CLAMP dependent male and female specifically spliced genes which are  
1908 common and unique direct targets of CLAMP and SXL.

1909

1910 **Table S11:** List of primers used for validation.

1911

1912

1913

1914

1915

1916 **Table S2:** Summarizing the results and functions of the validated target genes (not part of sex-  
1917 determination pathway) at which splicing is regulated by CLAMP

| Gene name                        | Function                                                                                                                                                                                                                                                                                                                                                                                                                                                                                                                                                                    | Effect on splicing                                                                                                     |
|----------------------------------|-----------------------------------------------------------------------------------------------------------------------------------------------------------------------------------------------------------------------------------------------------------------------------------------------------------------------------------------------------------------------------------------------------------------------------------------------------------------------------------------------------------------------------------------------------------------------------|------------------------------------------------------------------------------------------------------------------------|
| Fus (Fusilli)                    | Fus regulates alternative splicing of specific genes and plays a role in embryonic dorsoventral patterning (Wakabayashi-Ito 2001) <sup>1</sup> . Its human ortholog ESRP1 (Epithelial splicing regulatory protein) regulates splicing during the epithelial to mesenchymal transition and is implicated in autosomal recessive non-syndromic deafness 109. Alternative splicing of both Fus and ESRP1 has been shown to confer distinct subcellular localization (Yang and Carstens 2017) <sup>2</sup> .                                                                    | CLAMP regulates splicing of retained intron in exon 97 of <i>fus</i> in males ( <b>Fig S4A, D, G</b> ).                |
| Wnd (Wallenda)                   | encodes for a MAP Kinase with roles in axonal injury signaling and in regulation of presynaptic bouton structure (Russo et al 2019) <sup>3</sup>                                                                                                                                                                                                                                                                                                                                                                                                                            | one of the isoforms isoA significantly downregulated only in males ( <b>Fig S4B, E, H</b> )                            |
| PEP (Protein on ecdysone puffs)  | PEP is part of the catalytic step 2 spliceosome (Herold et al 2009) <sup>4</sup> and physically interacts with MLE (Cugusi et al 2015) <sup>5</sup> , Squid (Amero et al 1993) <sup>26</sup> , Ubx and Abd-A (Bischof et al 2018) <sup>6</sup> .                                                                                                                                                                                                                                                                                                                            | Splicing of intron between exon 6-5 in <i>pep</i> is regulated by CLAMP in males ( <b>Fig S4E, J, O</b> ).             |
| spen                             | encodes an RRM (RNA recognition motif) domain protein that interacts with the <i>Hox</i> pathway (Willette et al 1999) <sup>7</sup> . It is orthologous to human SPEN (spen family transcriptional repressors) which recruits histone deacetylases. <i>de novo</i> truncating variants in <i>SPEN</i> have been linked to a neurodevelopmental disorder associated with obesity and increased BMI in females who also have a distinctive X chromosome epi-signature (Radio et al 2021) <sup>8</sup> .                                                                       | <i>spen</i> exon5 skipped transcript is significantly upregulated in females ( <b>Fig S4J, N</b> ) and not in males    |
| Ama (Amalgam)                    | regulates receptor ligand activity during cell-cell adhesion and positively regulates glial cell proliferation (Seeger et al. 1988, Fremion et al. 2000) <sup>9,10</sup> . Human ortholog LSAMP is implicated in ovarian and prostate cancer (Spears et al 2006, Petrovics et al 2015) <sup>11,12</sup>                                                                                                                                                                                                                                                                     | Isoform B show significant down-regulation in males after CLAMP RNAi ( <b>Fig S4K, O</b> ) compared to females         |
| iab4                             | non-coding RNA regulating <i>abd-A</i> , located within the essential <i>Hox</i> cluster that controls body plan patterning. CLAMP directly binds and regulates chromatin accessibility at this gene (Duan et al 2021) <sup>13</sup> .                                                                                                                                                                                                                                                                                                                                      | retained intron isoform is significantly down-regulated in males in absence of CLAMP ( <b>Fig S4L, P</b> ).            |
| sc35 (SR family splicing factor) | Sc35 regulates mRNA alternative splicing, the processing of mRNA 3'ends, and transcription start site selection. The human ortholog, SRSF2, is linked to acute myeloid leukemia and myelodysplastic syndrome in which females show a significant survival advantage over their male counterparts (Hossain and Xie 2015, Wang et al 2019) <sup>14,15</sup> . Affected men have overall more mutations in genes involved in RNA splicing and epigenetic regulation with a higher risk of disease progression and overall poor outcome (Karantanos et al 2021) <sup>16</sup> . | Splicing of a <i>sc35</i> isoform with exon7 is significantly affected in males and not females ( <b>Fig S4M, Q</b> ). |

|                |                                                                                                                     |                                                                                                                                                                                           |
|----------------|---------------------------------------------------------------------------------------------------------------------|-------------------------------------------------------------------------------------------------------------------------------------------------------------------------------------------|
| Bacc (Bacchus) | encodes for tyramine dependent nuclear regulators involved in ethanol sensitivity (Chen et al 2013) <sup>17</sup> . | CLAMP-dependent splicing in both males and females ( <b>Fig S4M, R</b> ). However, isoform B with exon3 is significantly down-regulated in males compared to females in absence of CLAMP. |
|----------------|---------------------------------------------------------------------------------------------------------------------|-------------------------------------------------------------------------------------------------------------------------------------------------------------------------------------------|

1918

1. Wakabayashi-Ito N, Belvin MP, Bluestein DA, Anderson KV. Fusilli, an essential gene with a maternal role in *Drosophila* embryonic dorsal–ventral patterning. *Developmental Biology* 229, 44-54 (2001).
2. Yang Y, Carstens RP. Alternative splicing regulates distinct subcellular localization of Epithelial splicing regulatory protein 1 (Esrp1) isoforms. *Scientific reports* 7, 1-10 (2017).
3. Russo A, Goel P, Brace E, Buser C, Dickman D, DiAntonio A. The E3 ligase Highwire promotes synaptic transmission by targeting the NAD-synthesizing enzyme dNmnat. *EMBO reports* 20, e46975 (2019).
4. Herold N, Will CL, Wolf E, Kastner B, Urlaub H, Lührmann R. Conservation of the protein composition and electron microscopy structure of *Drosophila melanogaster* and human spliceosomal complexes. *Molecular and cellular biology* 29, 281-301 (2009).
5. Cugusi S, Kallappagoudar S, Ling H, Lucchesi JC. The *Drosophila* helicase maleless (MLE) is implicated in functions distinct from its role in dosage compensation. *Molecular & Cellular Proteomics* 14, 1478-1488 (2015).
6. Bischof J, et al. Generation of a versatile BiFC ORFeome library for analyzing protein–protein interactions in live *Drosophila*. *Elife* 7, e38853 (2018).
7. Wiellette EL, Harding KW, Mace KA, Ronshaugen MR, Wang FY, McGinnis W. spen encodes an RNP motif protein that interacts with Hox pathways to repress the development of head-like sclerites in the *Drosophila* trunk. *Development* 126, 5373-5385 (1999).
8. Radio FC, et al. SPEN haploinsufficiency causes a neurodevelopmental disorder overlapping proximal 1p36 deletion syndrome with an epismature of X chromosomes in females. *The American Journal of Human Genetics* 108, 502-516 (2021).
9. Fremion F, Darboux I, Diano M, Hipeau-Jacquotte R, Seeger M, Piovant M. Amalgam is a ligand for the transmembrane receptor neurotactin and is required for neurotactin-mediated cell adhesion and axon fasciculation in *Drosophila*. *The EMBO Journal* 19, 4463-4472 (2000).
10. Seeger MA, Haffley L, Kaufman TC. Characterization of amalgam: a member of the immunoglobulin superfamily from *Drosophila*. *Cell* 55, 589-600 (1988).
11. Spears M, et al. The function of tumor suppressor genes in ovarian cancer: the role of LSAMP. *AACR* (2006).
12. Petrovics G, et al. A novel genomic alteration of LSAMP associates with aggressive prostate cancer in African American men. *EBioMedicine* 2, 1957-1964 (2015).
13. Duan JE, et al. CLAMP and Zelda function together to promote *Drosophila* zygotic genome activation. *elife* 10, 2020.2007. 2015.205054 (2021).
14. Hossain MJ, Xie L. Sex disparity in childhood and young adult acute myeloid leukemia (AML) survival: Evidence from US population data. *Cancer epidemiology* 39, 892-900 (2015).
15. Wang F, Ni J, Wu L, Wang Y, He B, Yu D. Gender disparity in the survival of patients with primary myelodysplastic syndrome. *Journal of Cancer* 10, 1325 (2019).
16. Karantanos T, Jain T, Moliterno AR, Jones RJ, DeZern AE. Sex-Related Differences in Chronic Myeloid Neoplasms: From the Clinical Observation to the Underlying Biology. *International journal of molecular sciences* 22, 2595 (2021).
17. Chen J, Wang Y, Zhang Y, Shen P. Mutations in Bacchus reveal a tyramine-dependent nuclear regulator for acute ethanol sensitivity in *Drosophila*. *Neuropharmacology* 67, 25-31 (2013).

1919

1920 **Table S11:** List of primers used for validation.

| Gene           | Primer          | Primer sequence (5'-3') |
|----------------|-----------------|-------------------------|
| 1. <i>wnd</i>  | wnd_A5_FP       | AGCGGAACTCCAAGAAGAGC    |
|                | wnd_A5_RP       | GCTGAACGGTTGCATTGT      |
| 2. <i>fus</i>  | fusRI_FP        | TTCACCACTGGGGATACTCC    |
|                | fusRI_RP        | TTGATAACCATATGGACACC    |
| 3. <i>pep</i>  | pepSE_exon6_FP  | GGATCGGAGCGTAATATT      |
|                | pepSE_exon6_RP  | CAAGGCGACATGTTTCATA     |
| 4. <i>iab4</i> | iab4_RI_FP      | TTCCTATCGCCACTCACTGG    |
|                | iab4_RI_RP      | CCCTGTTCTAGACATTAAC     |
| 5. <i>spen</i> | spenSE_exon5_FP | AACTACTACGACACAACA      |
|                | spenSE_exon5_RP | ATCAACATTACTGTCGTCAC    |
| 6. <i>ama</i>  | Ama_A5_FP       | AACATCCTGTAAATAAACAG    |
|                | Ama_A5_RP       | TATAAGACCGATTAGAAGCC    |
| 7. <i>sc35</i> | sc35_AF_FP      | CCACCTCCACGGATCGATGG    |
|                | sc35_AF_RP      | GCGGCTCTCACGTGTGTAGC    |
| 8. <i>bacc</i> | baccA5_FP       | CAGTCTTGTACGAACCGTCG    |
|                | baccA5_RP       | CTGGCCTCTTGGTGCCTTTC    |

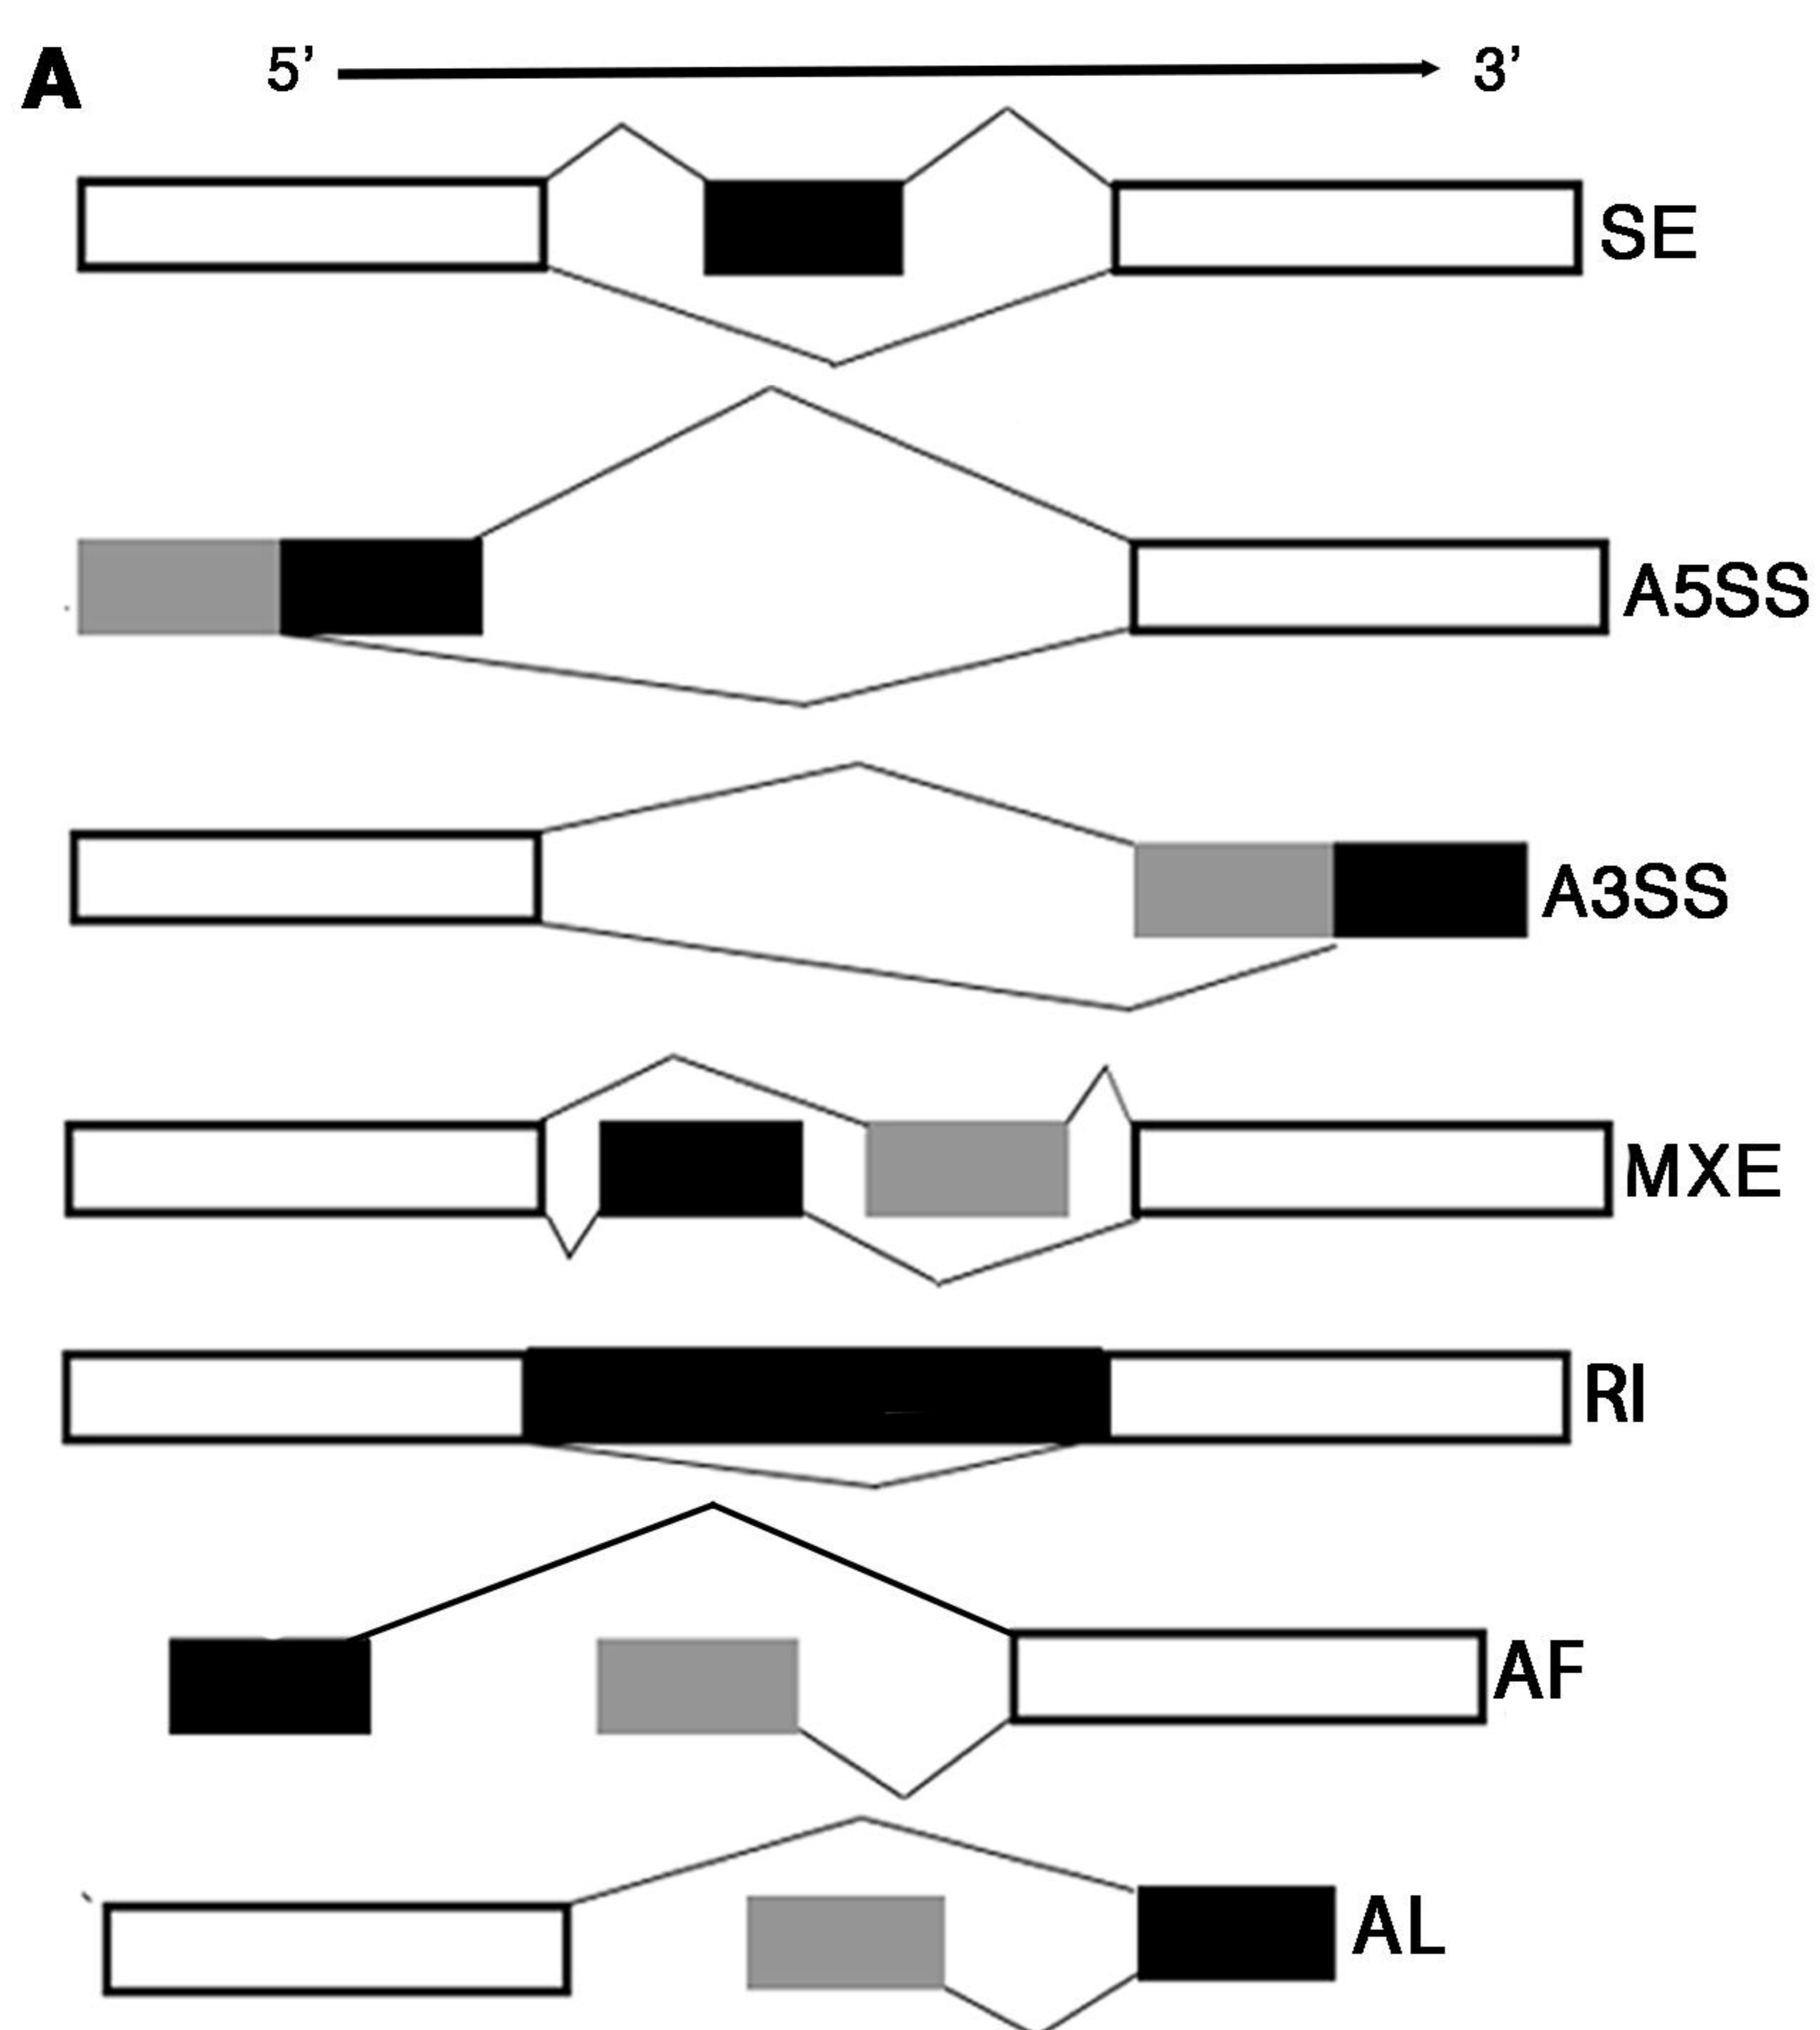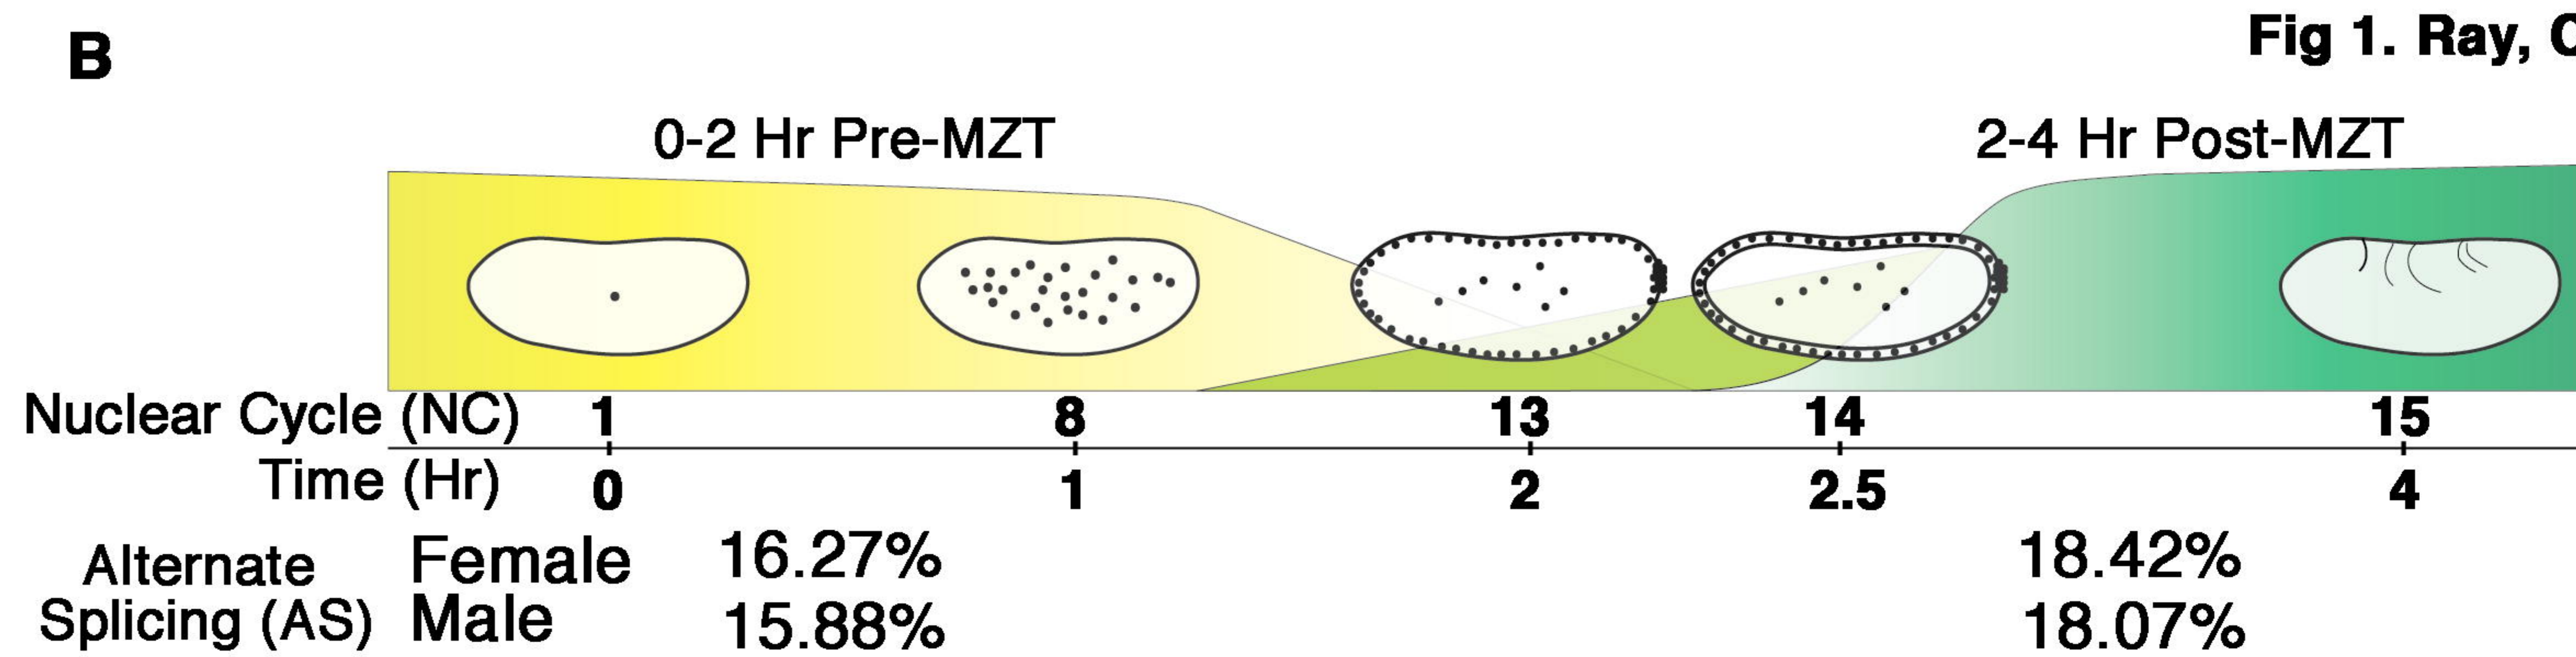

**C**

|                                           | Sex    | Stage         | Total Exon | Constitutive exon | Alternatively Spliced Exons |      |      |      |      |      |      |     |
|-------------------------------------------|--------|---------------|------------|-------------------|-----------------------------|------|------|------|------|------|------|-----|
|                                           |        |               |            |                   | Total                       | SE   | A5SS | A3SS | MXE  | RI   | AF   | AL  |
| <i>MTD-GAL4&gt;</i><br><i>UAS-GFPRNAi</i> | Female | 0-2 Hr Embryo | 66927      | 56036             | 10891                       | 1703 | 1918 | 1701 | 1519 | 1060 | 2626 | 364 |
|                                           | Male   | 0-2 Hr Embryo | 66927      | 56296             | 10631                       | 1708 | 1923 | 1692 | 1293 | 1060 | 2591 | 364 |
|                                           | Female | 2-4 Hr Embryo | 66927      | 54597             | 12330                       | 1874 | 2075 | 1866 | 2018 | 1177 | 2937 | 383 |
|                                           | Male   | 2-4 Hr Embryo | 66927      | 54831             | 12096                       | 1841 | 2022 | 1839 | 2008 | 1146 | 2868 | 372 |

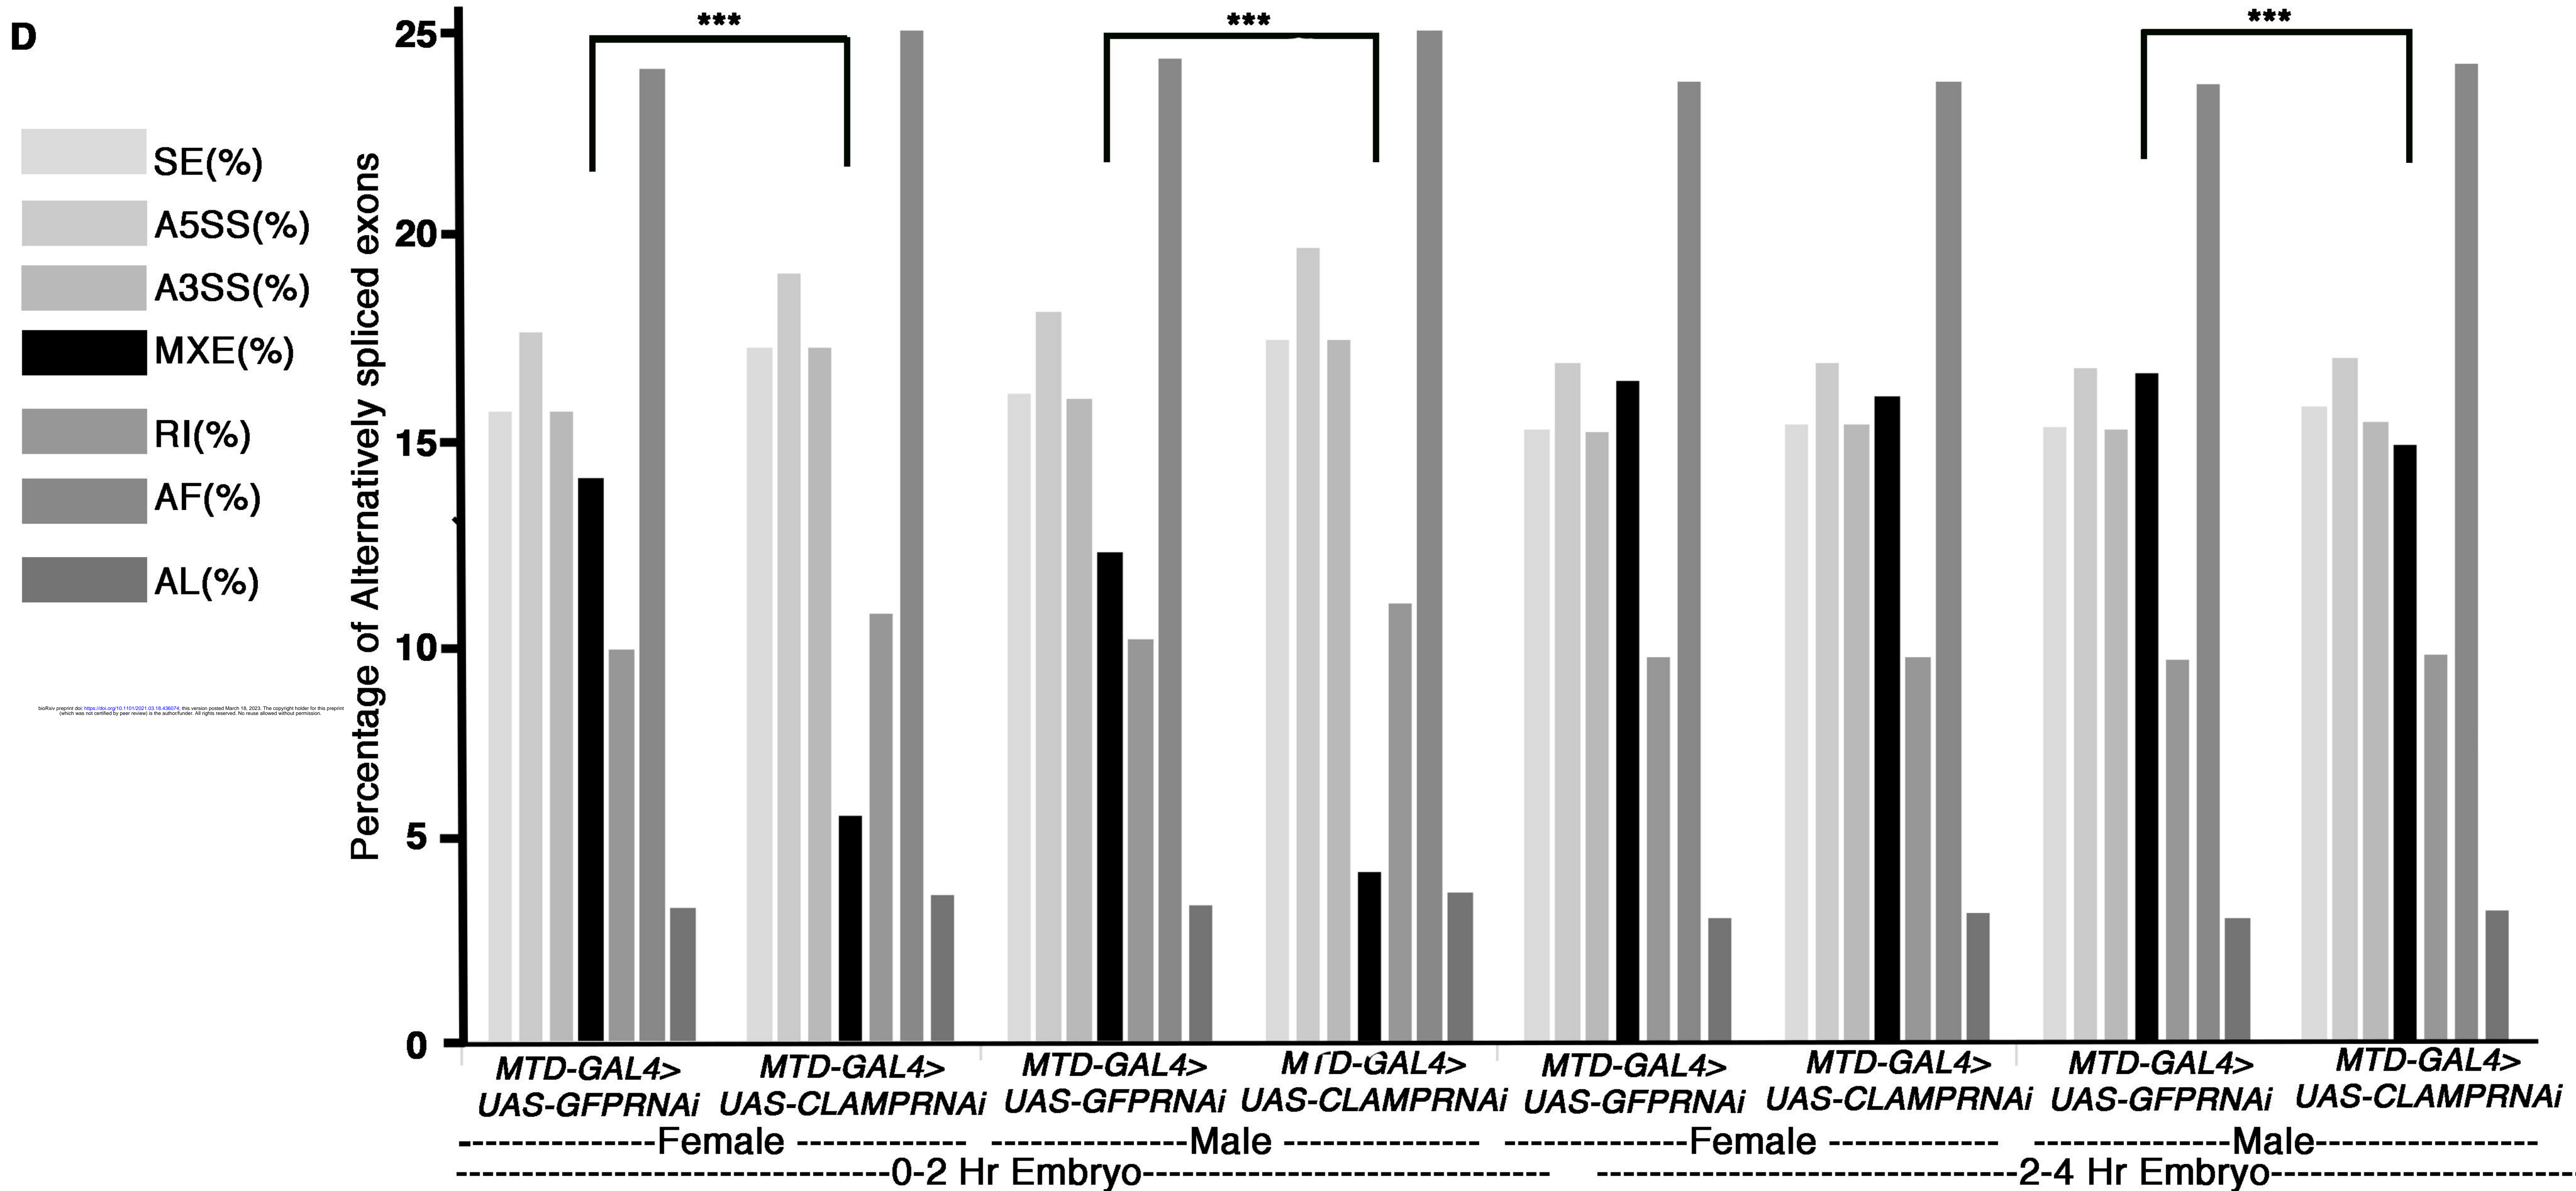

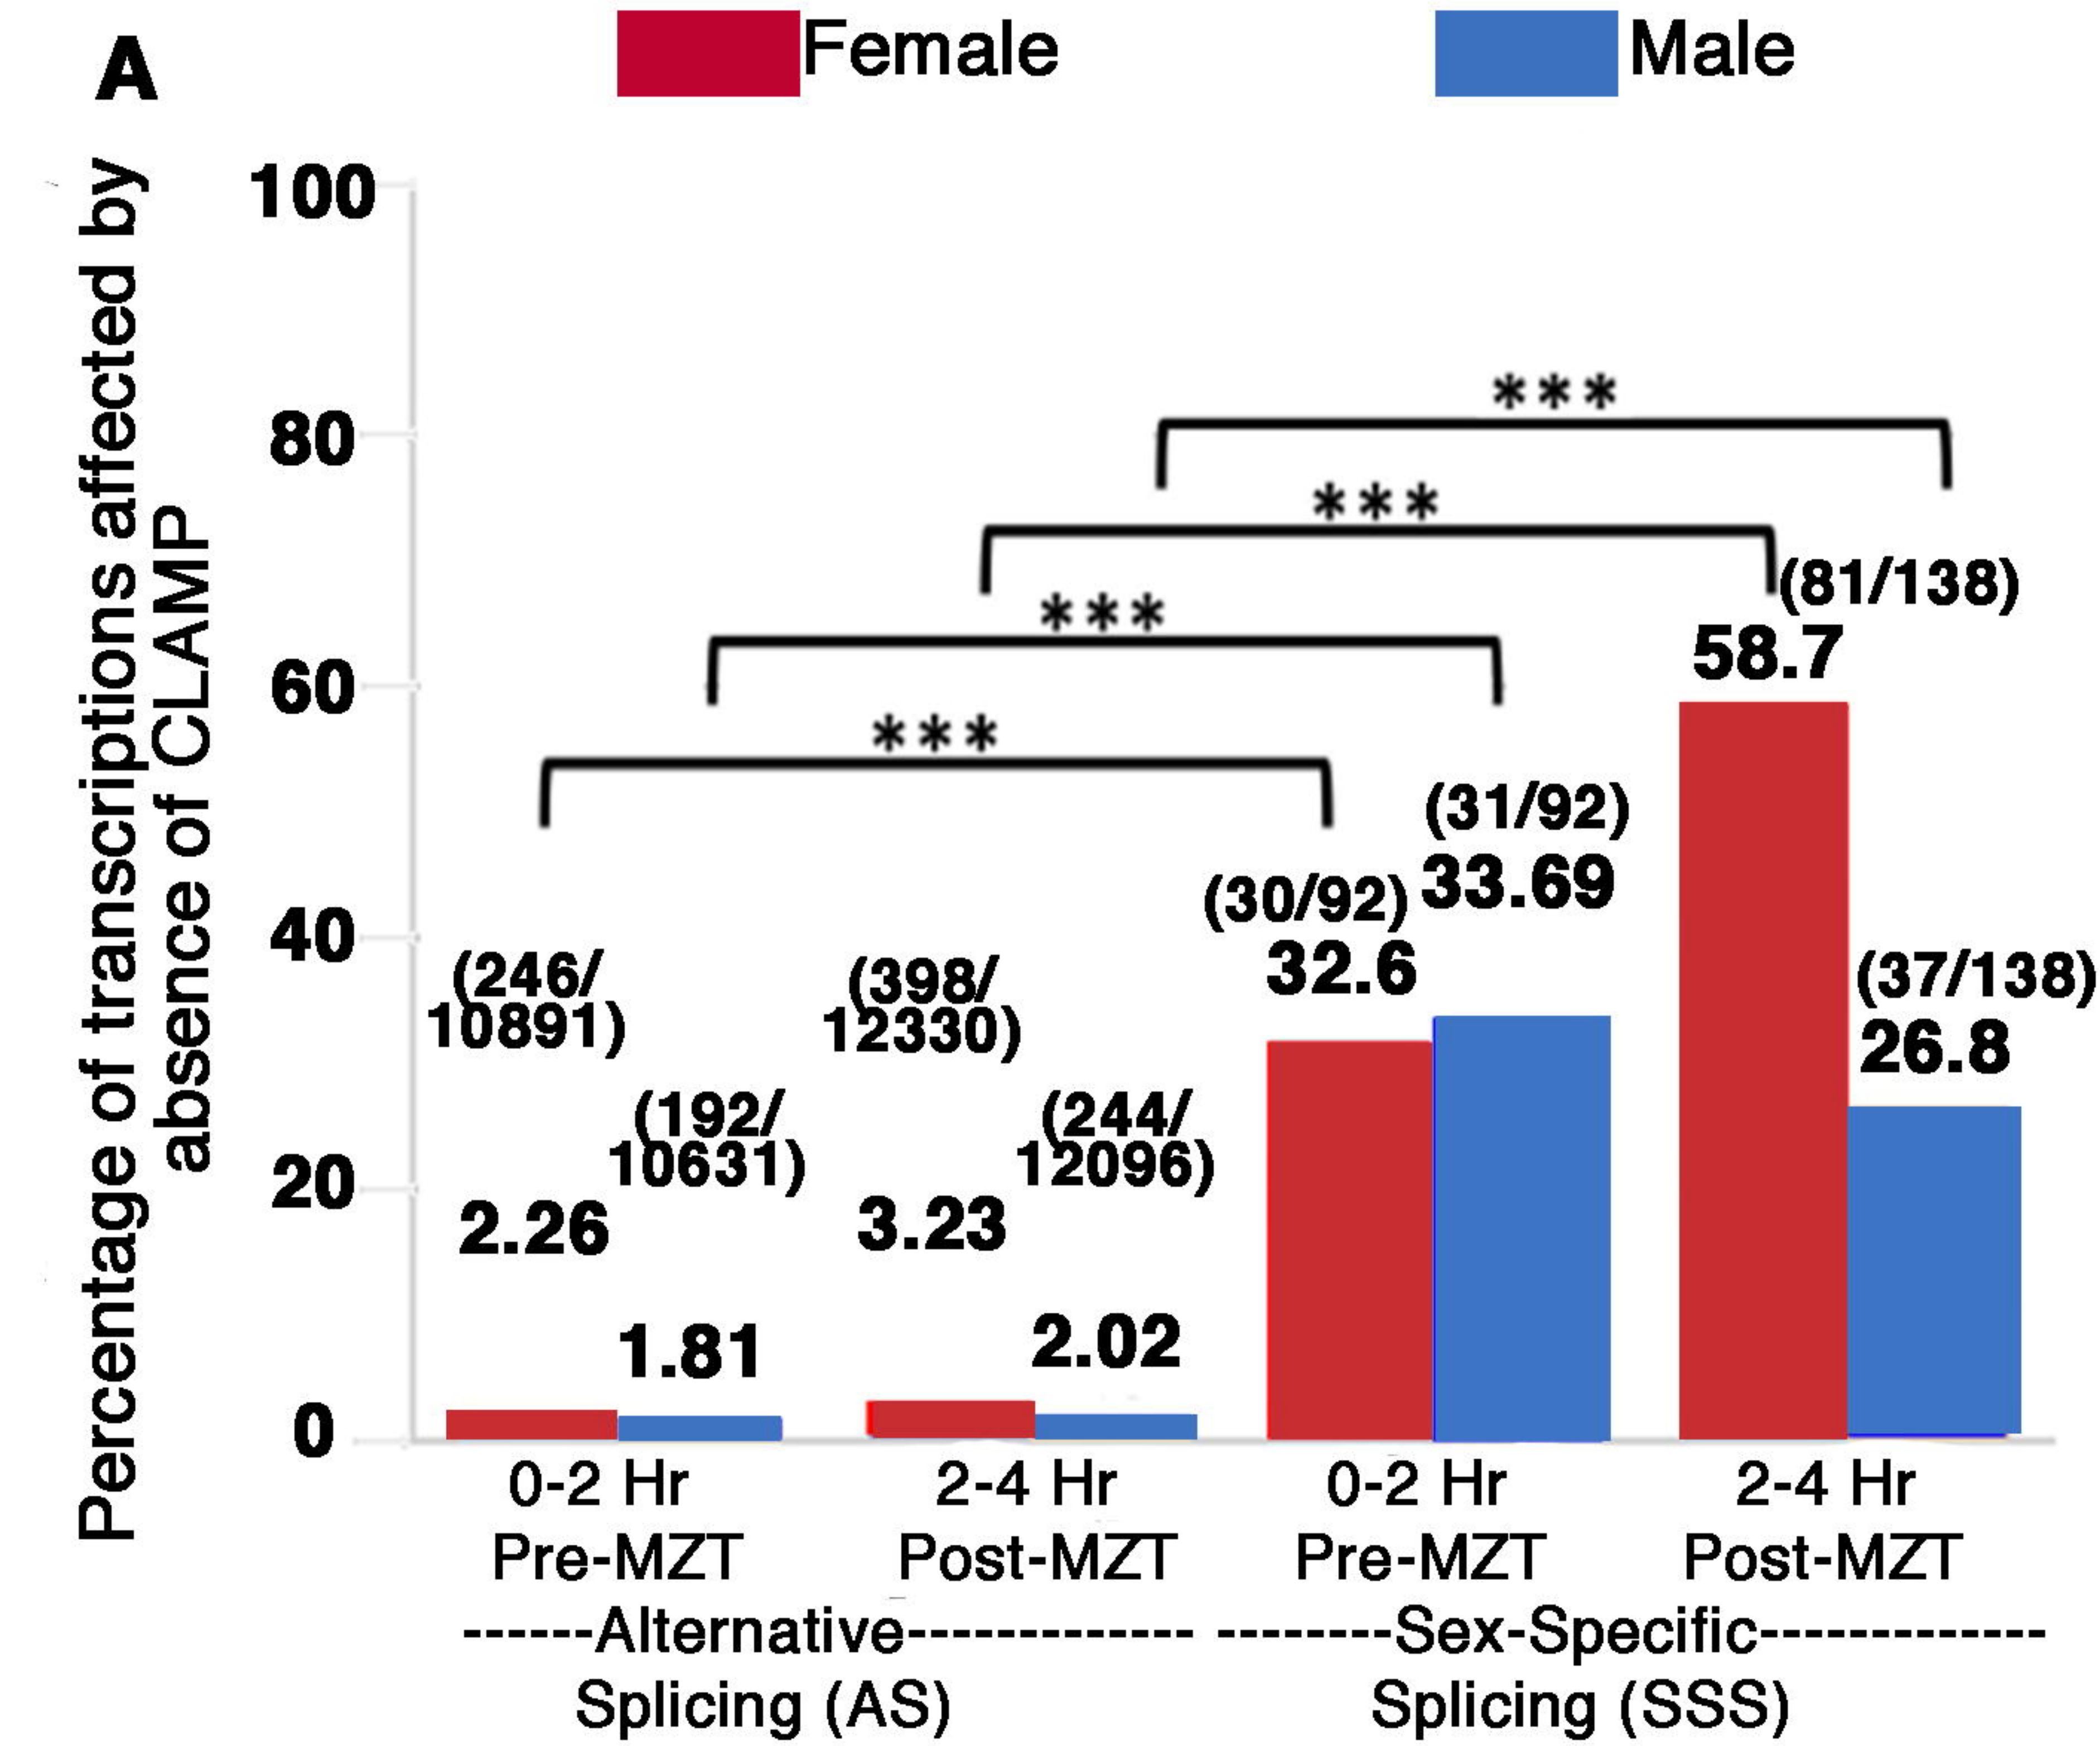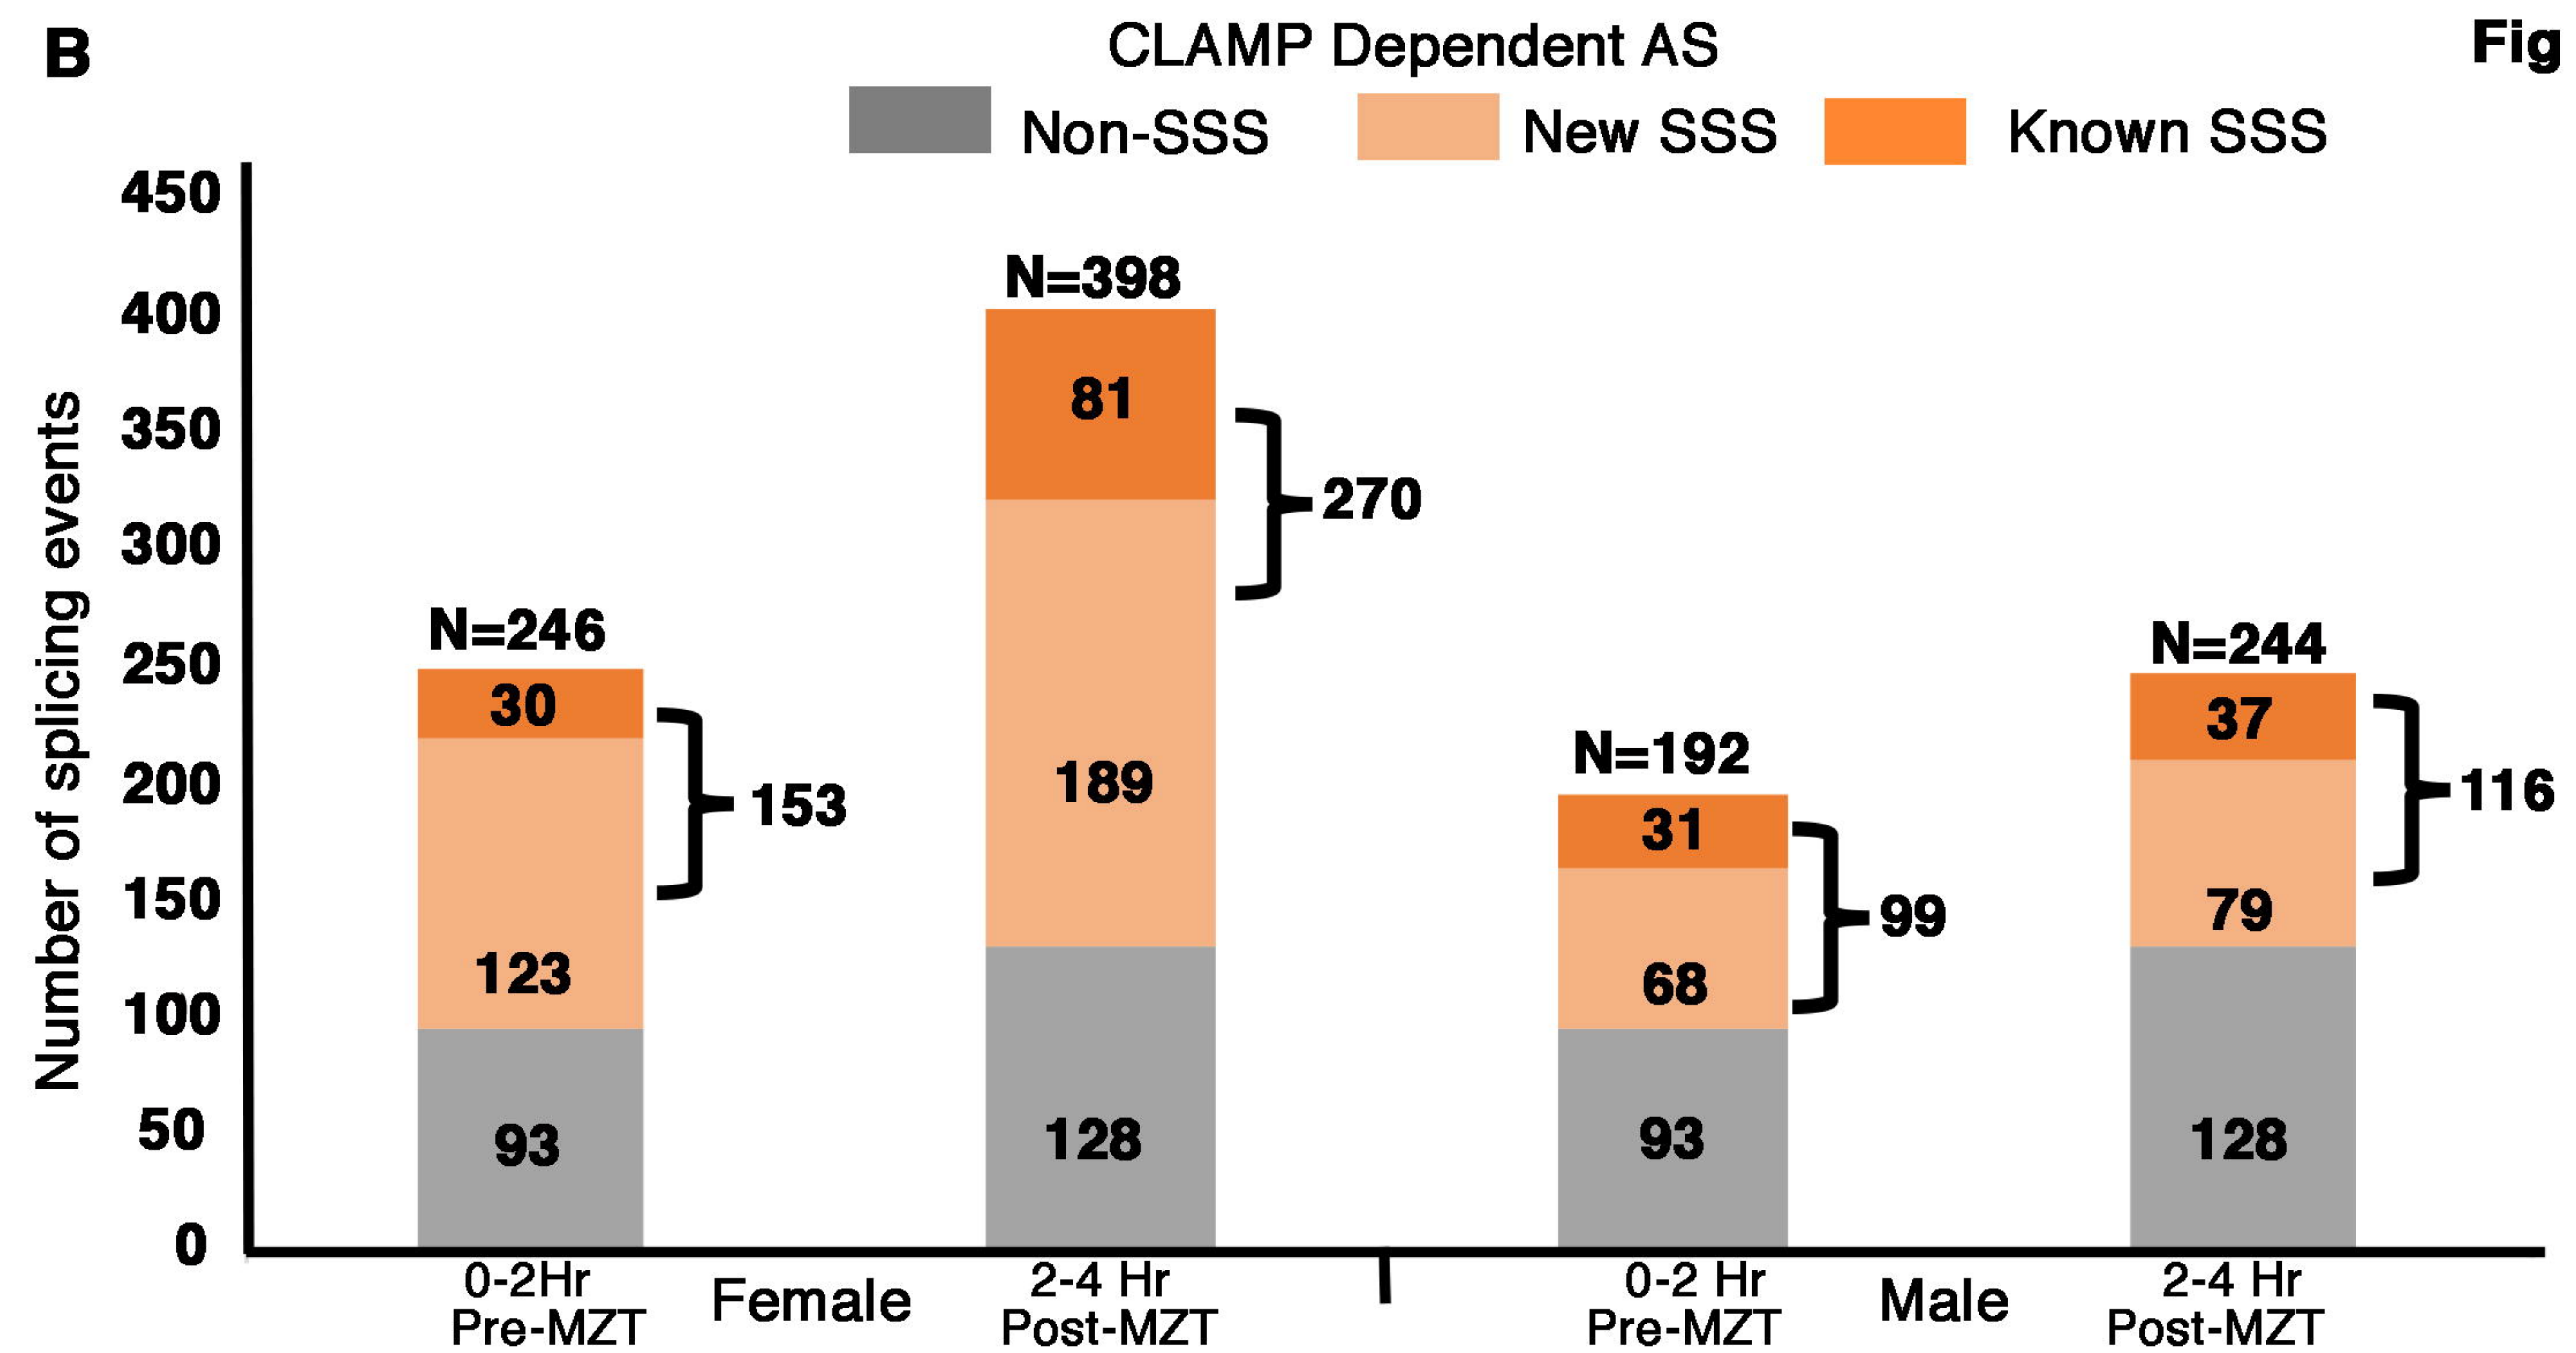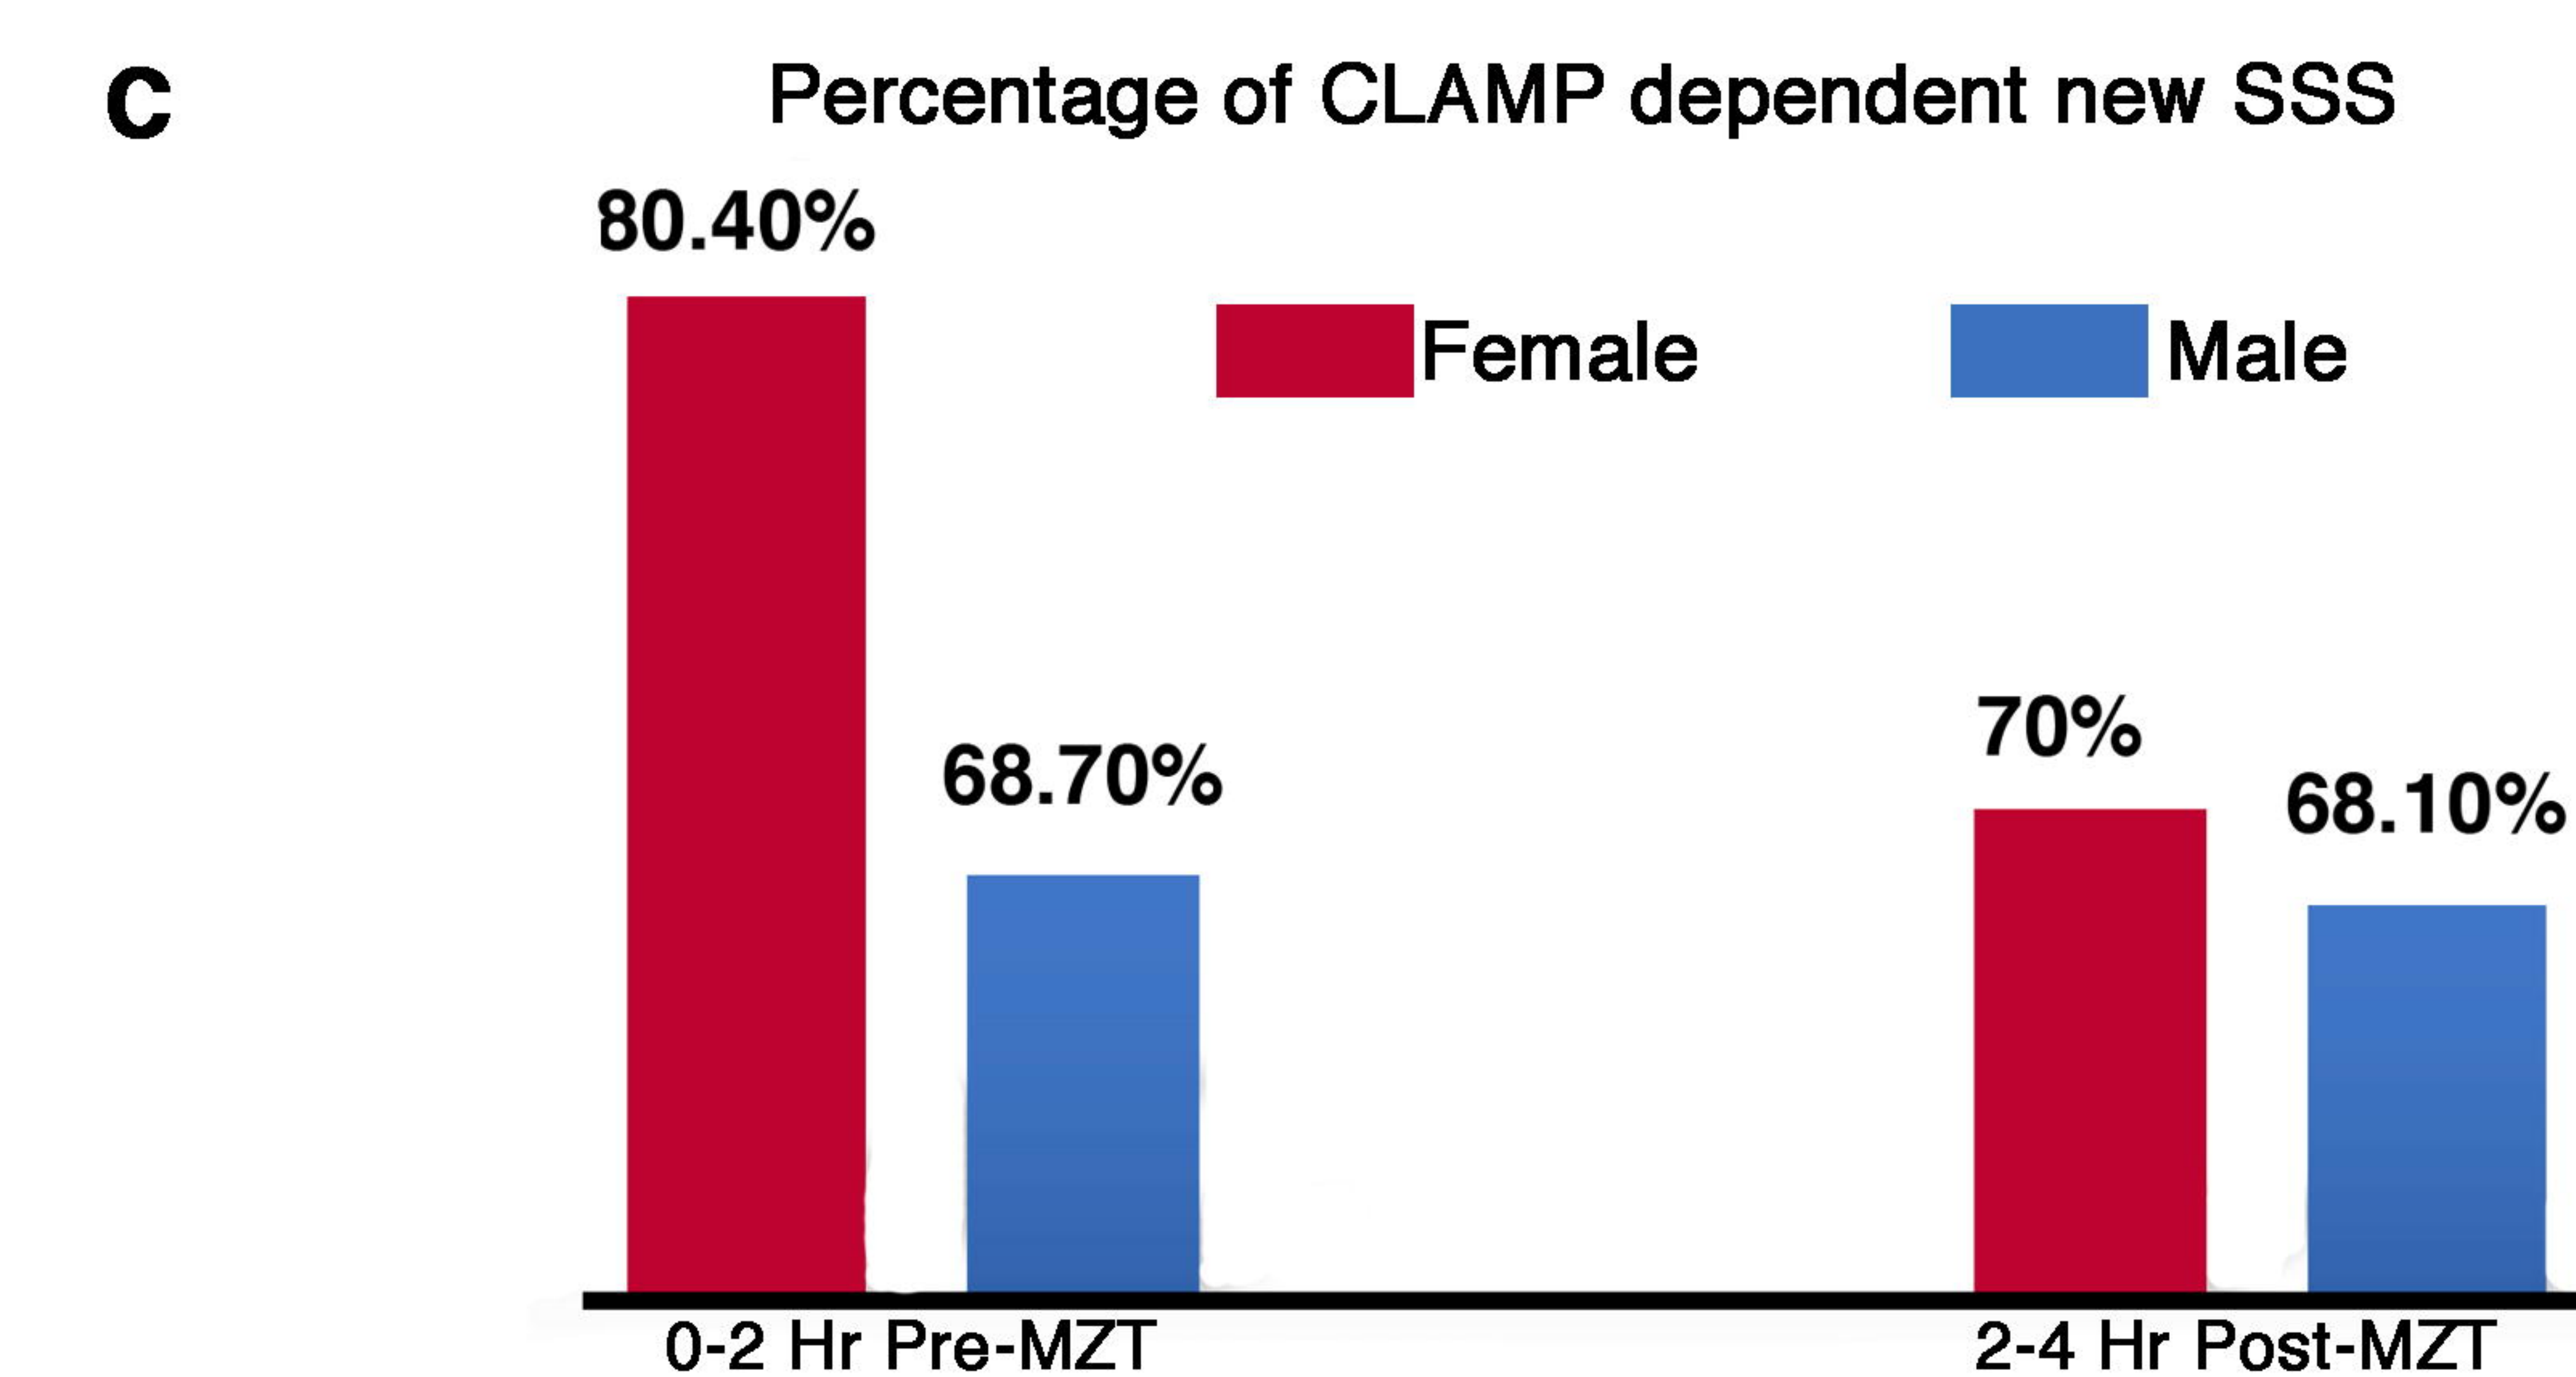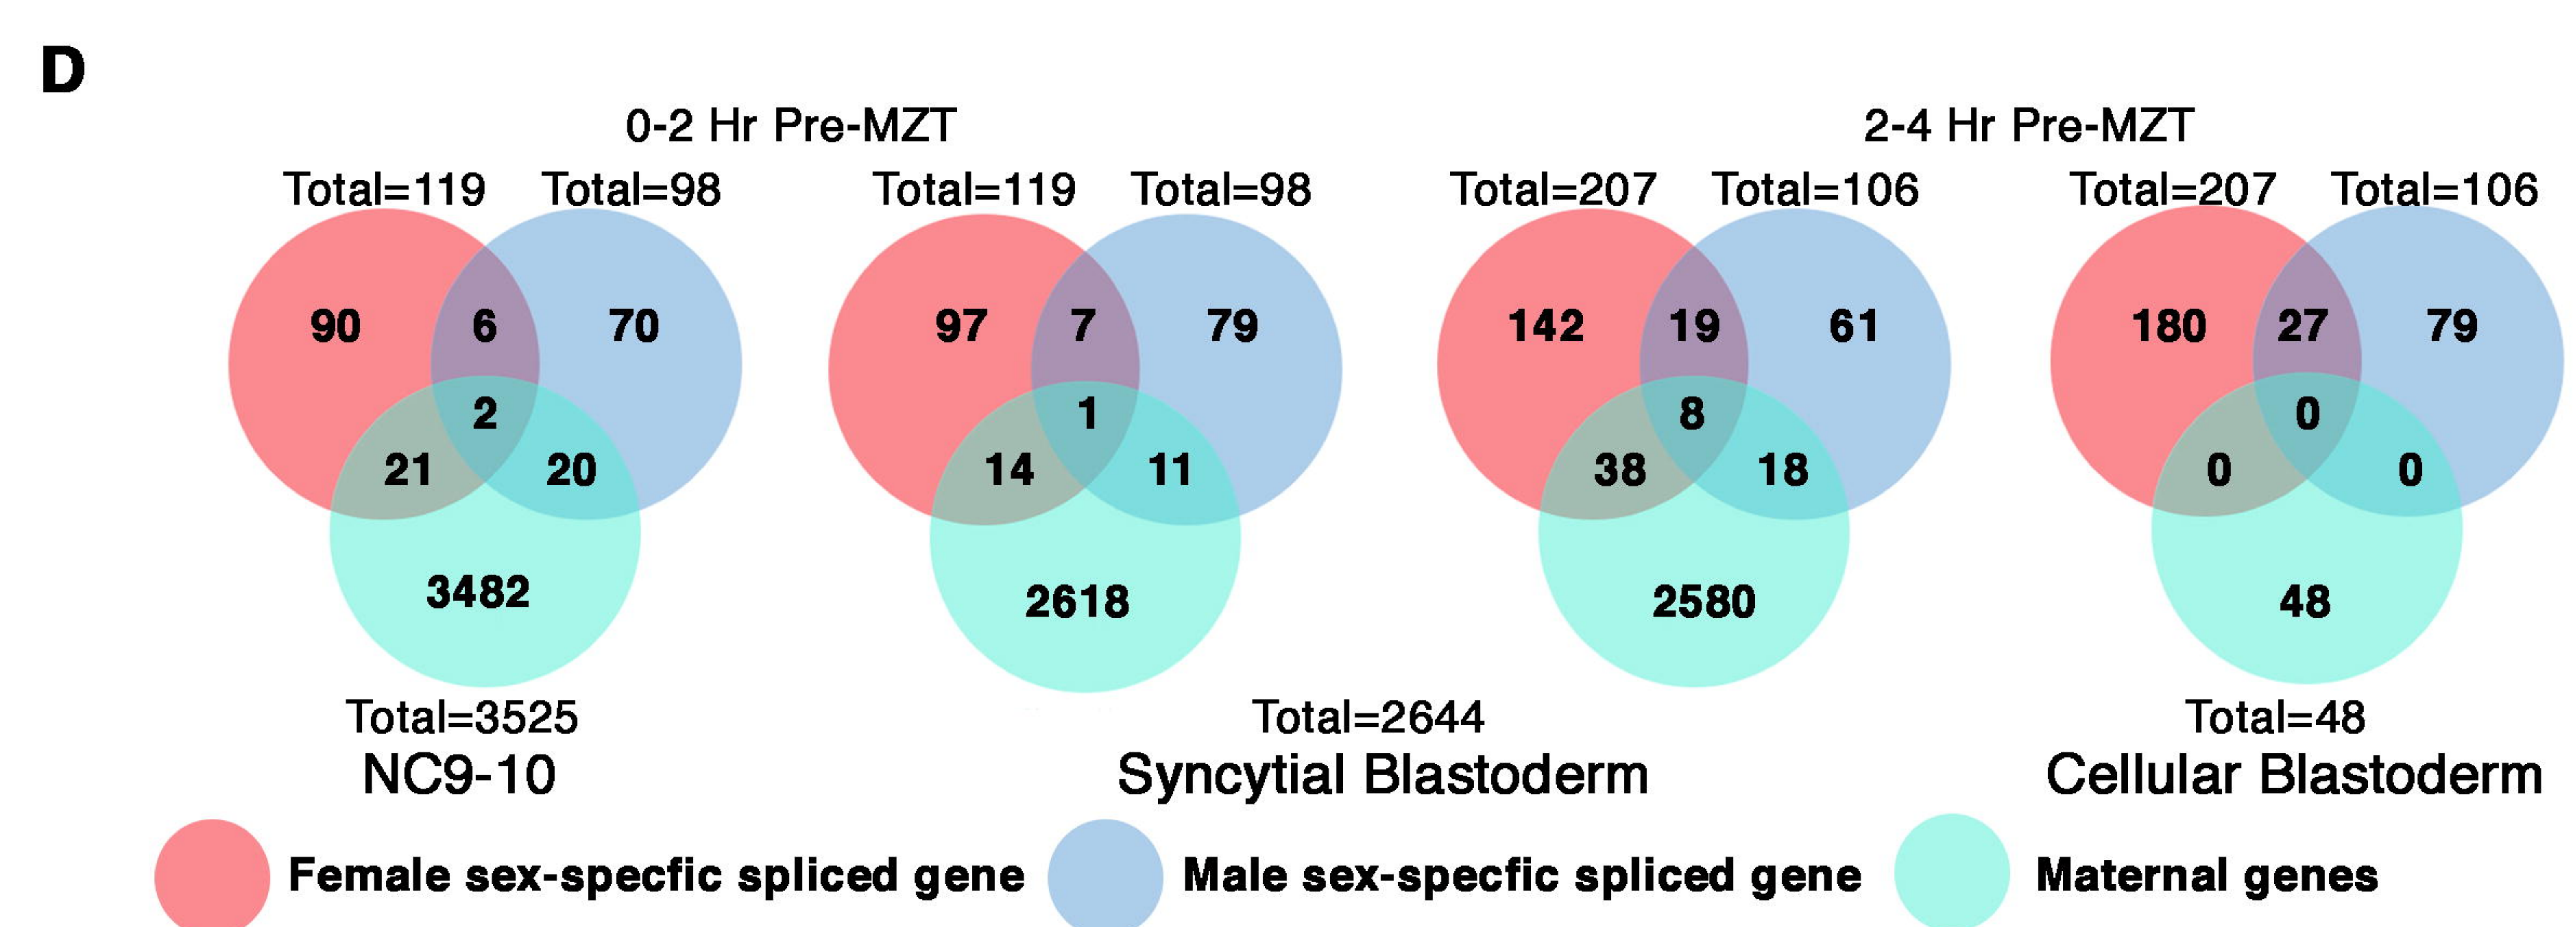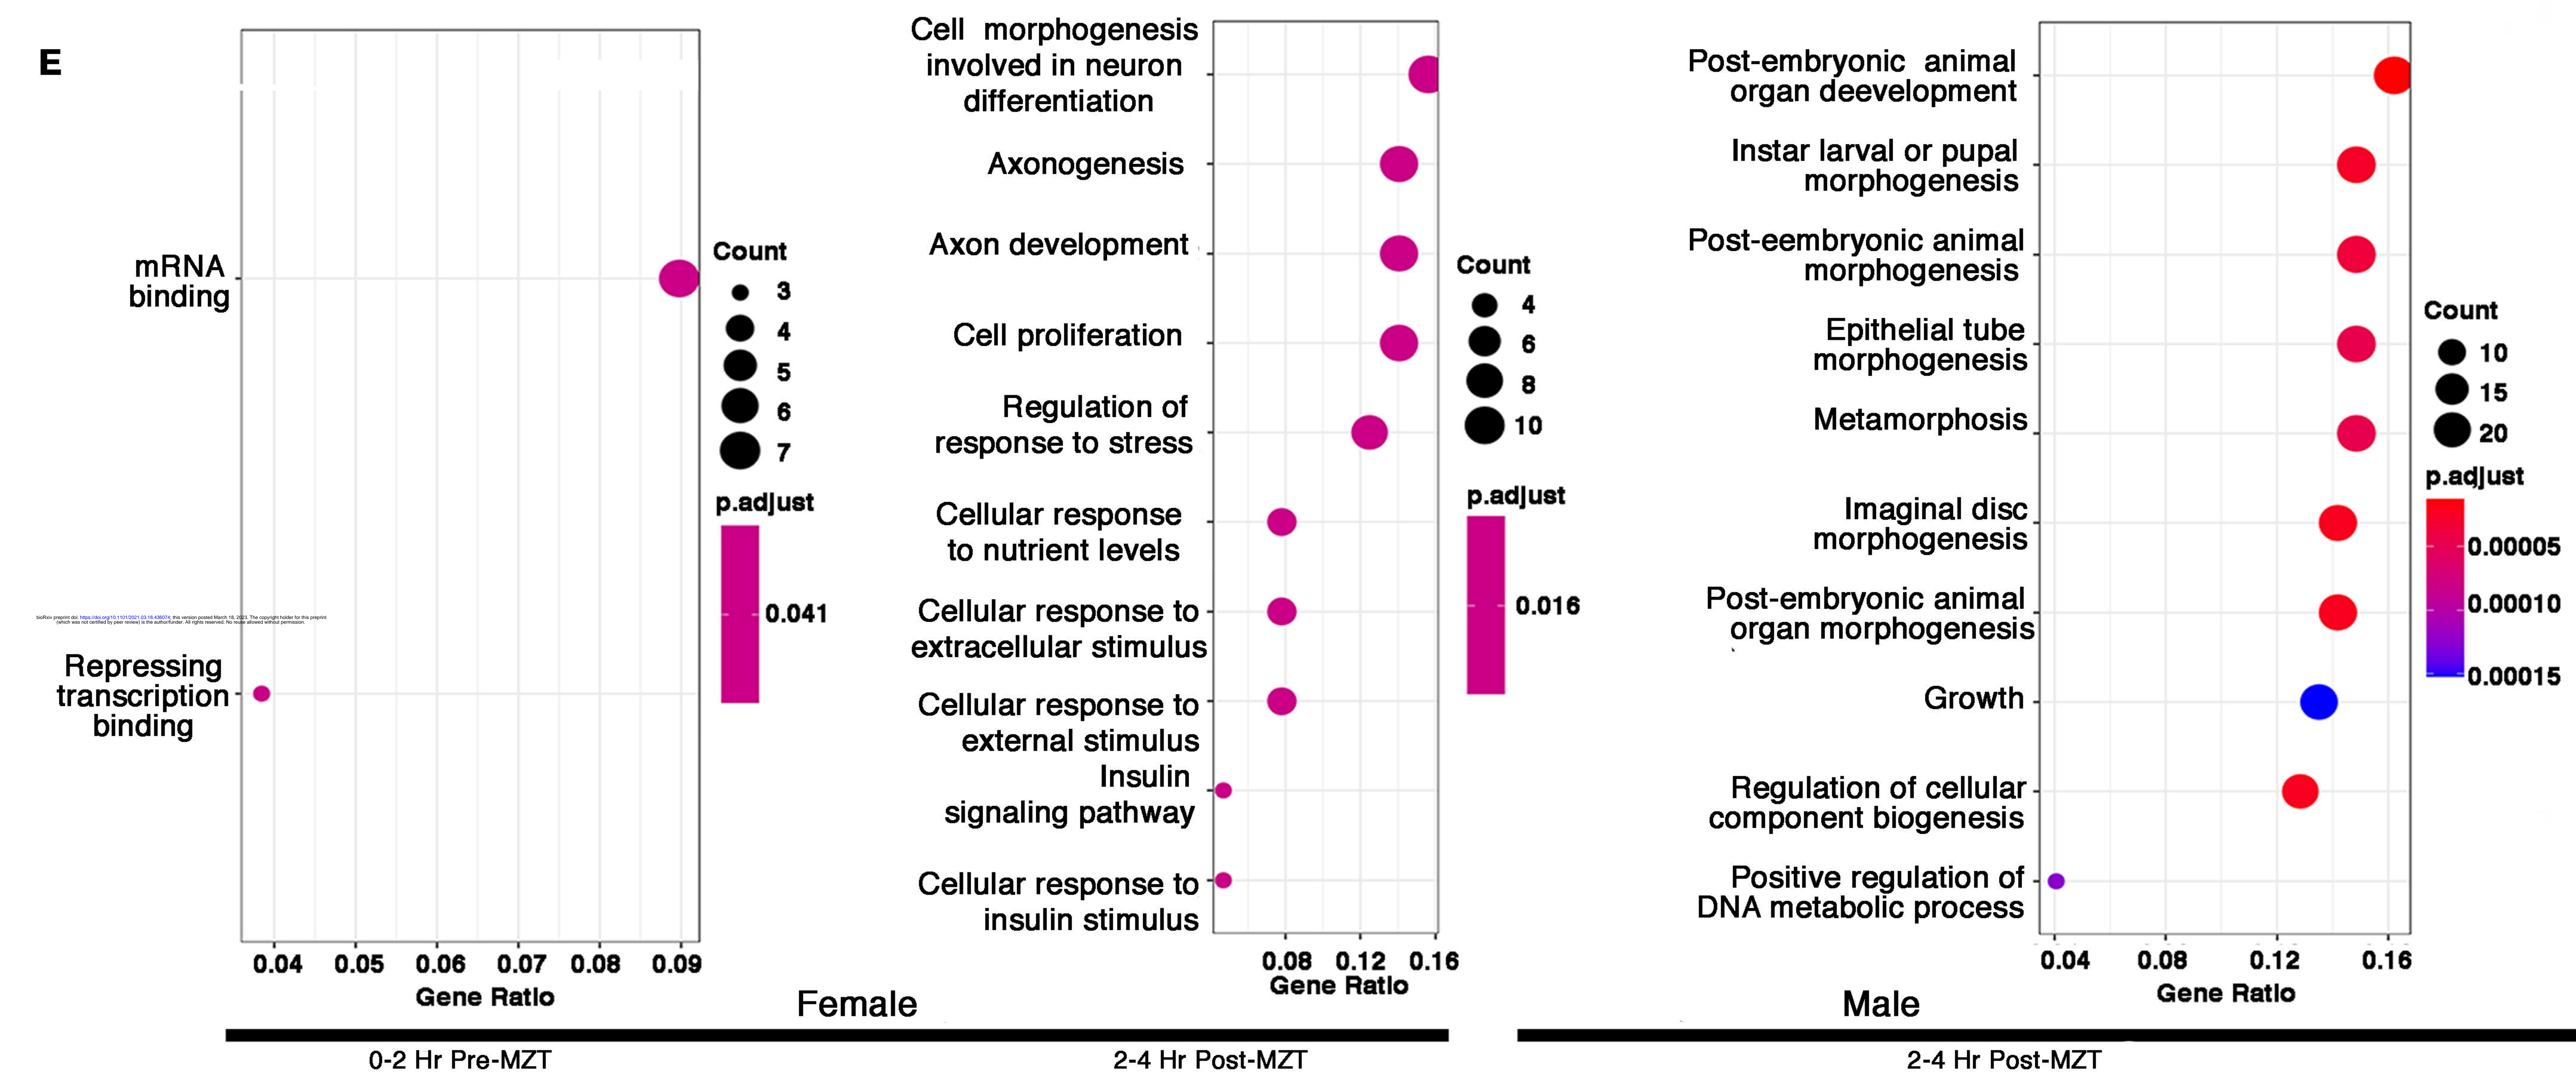



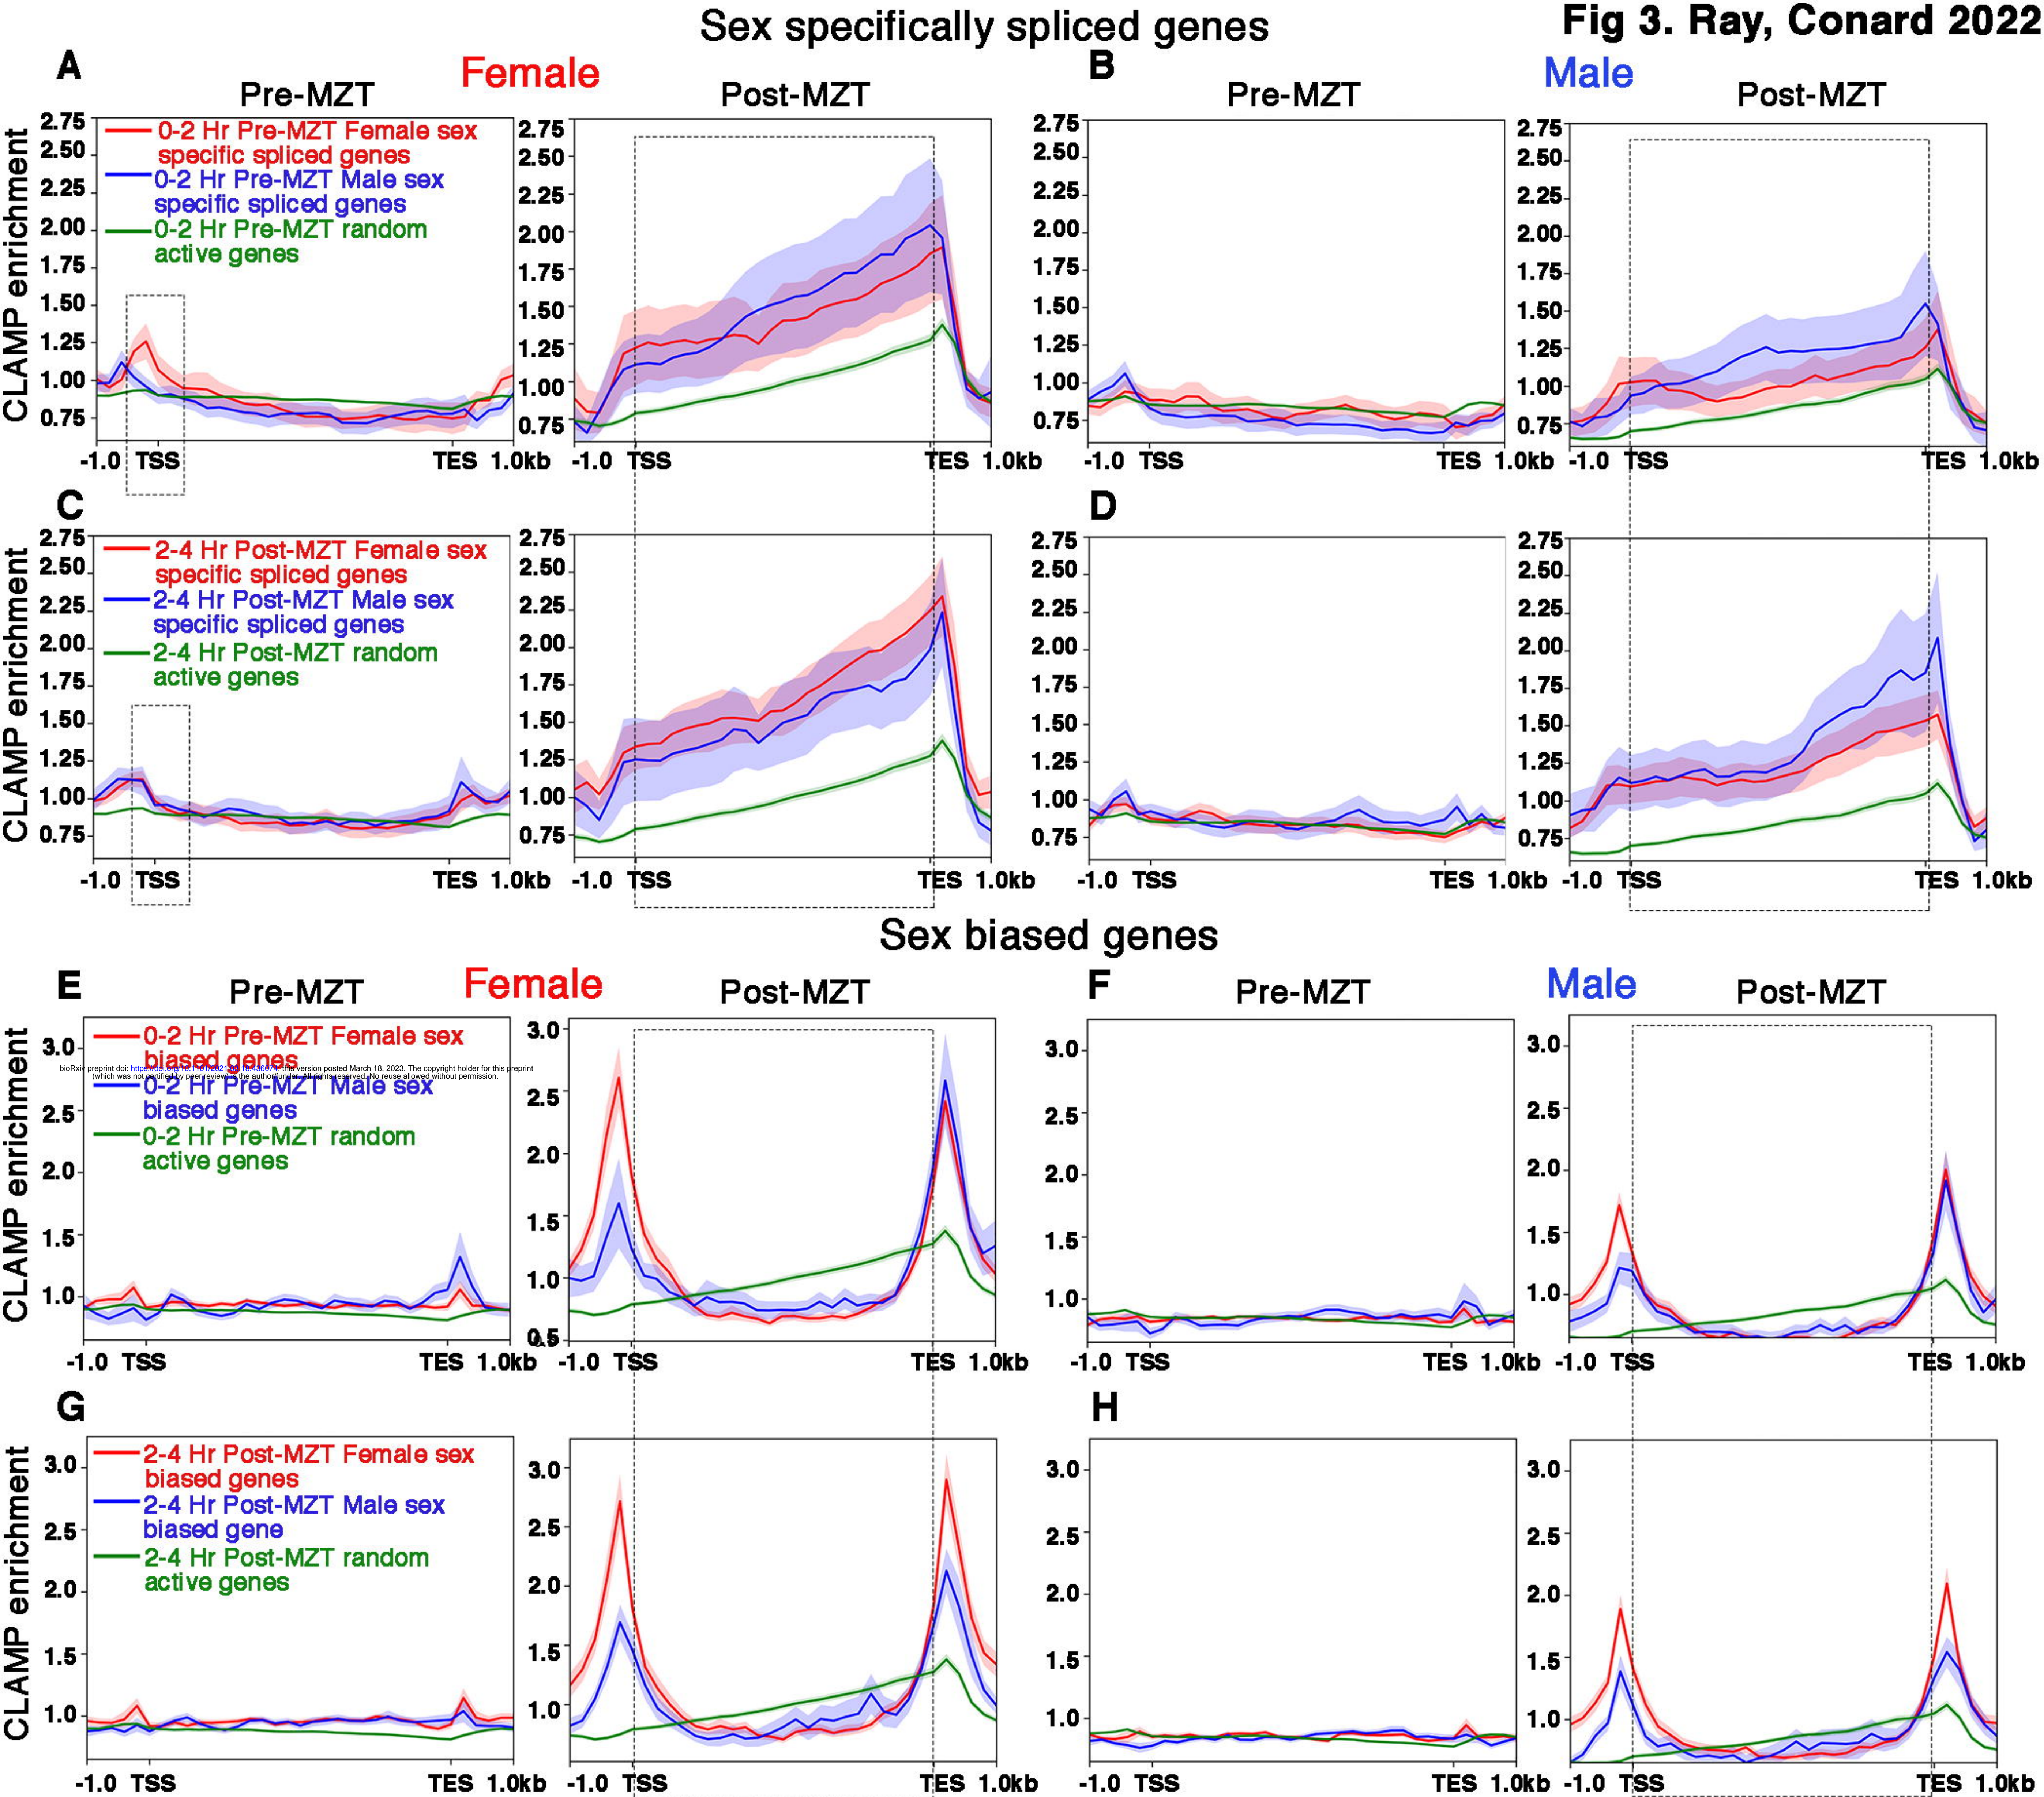

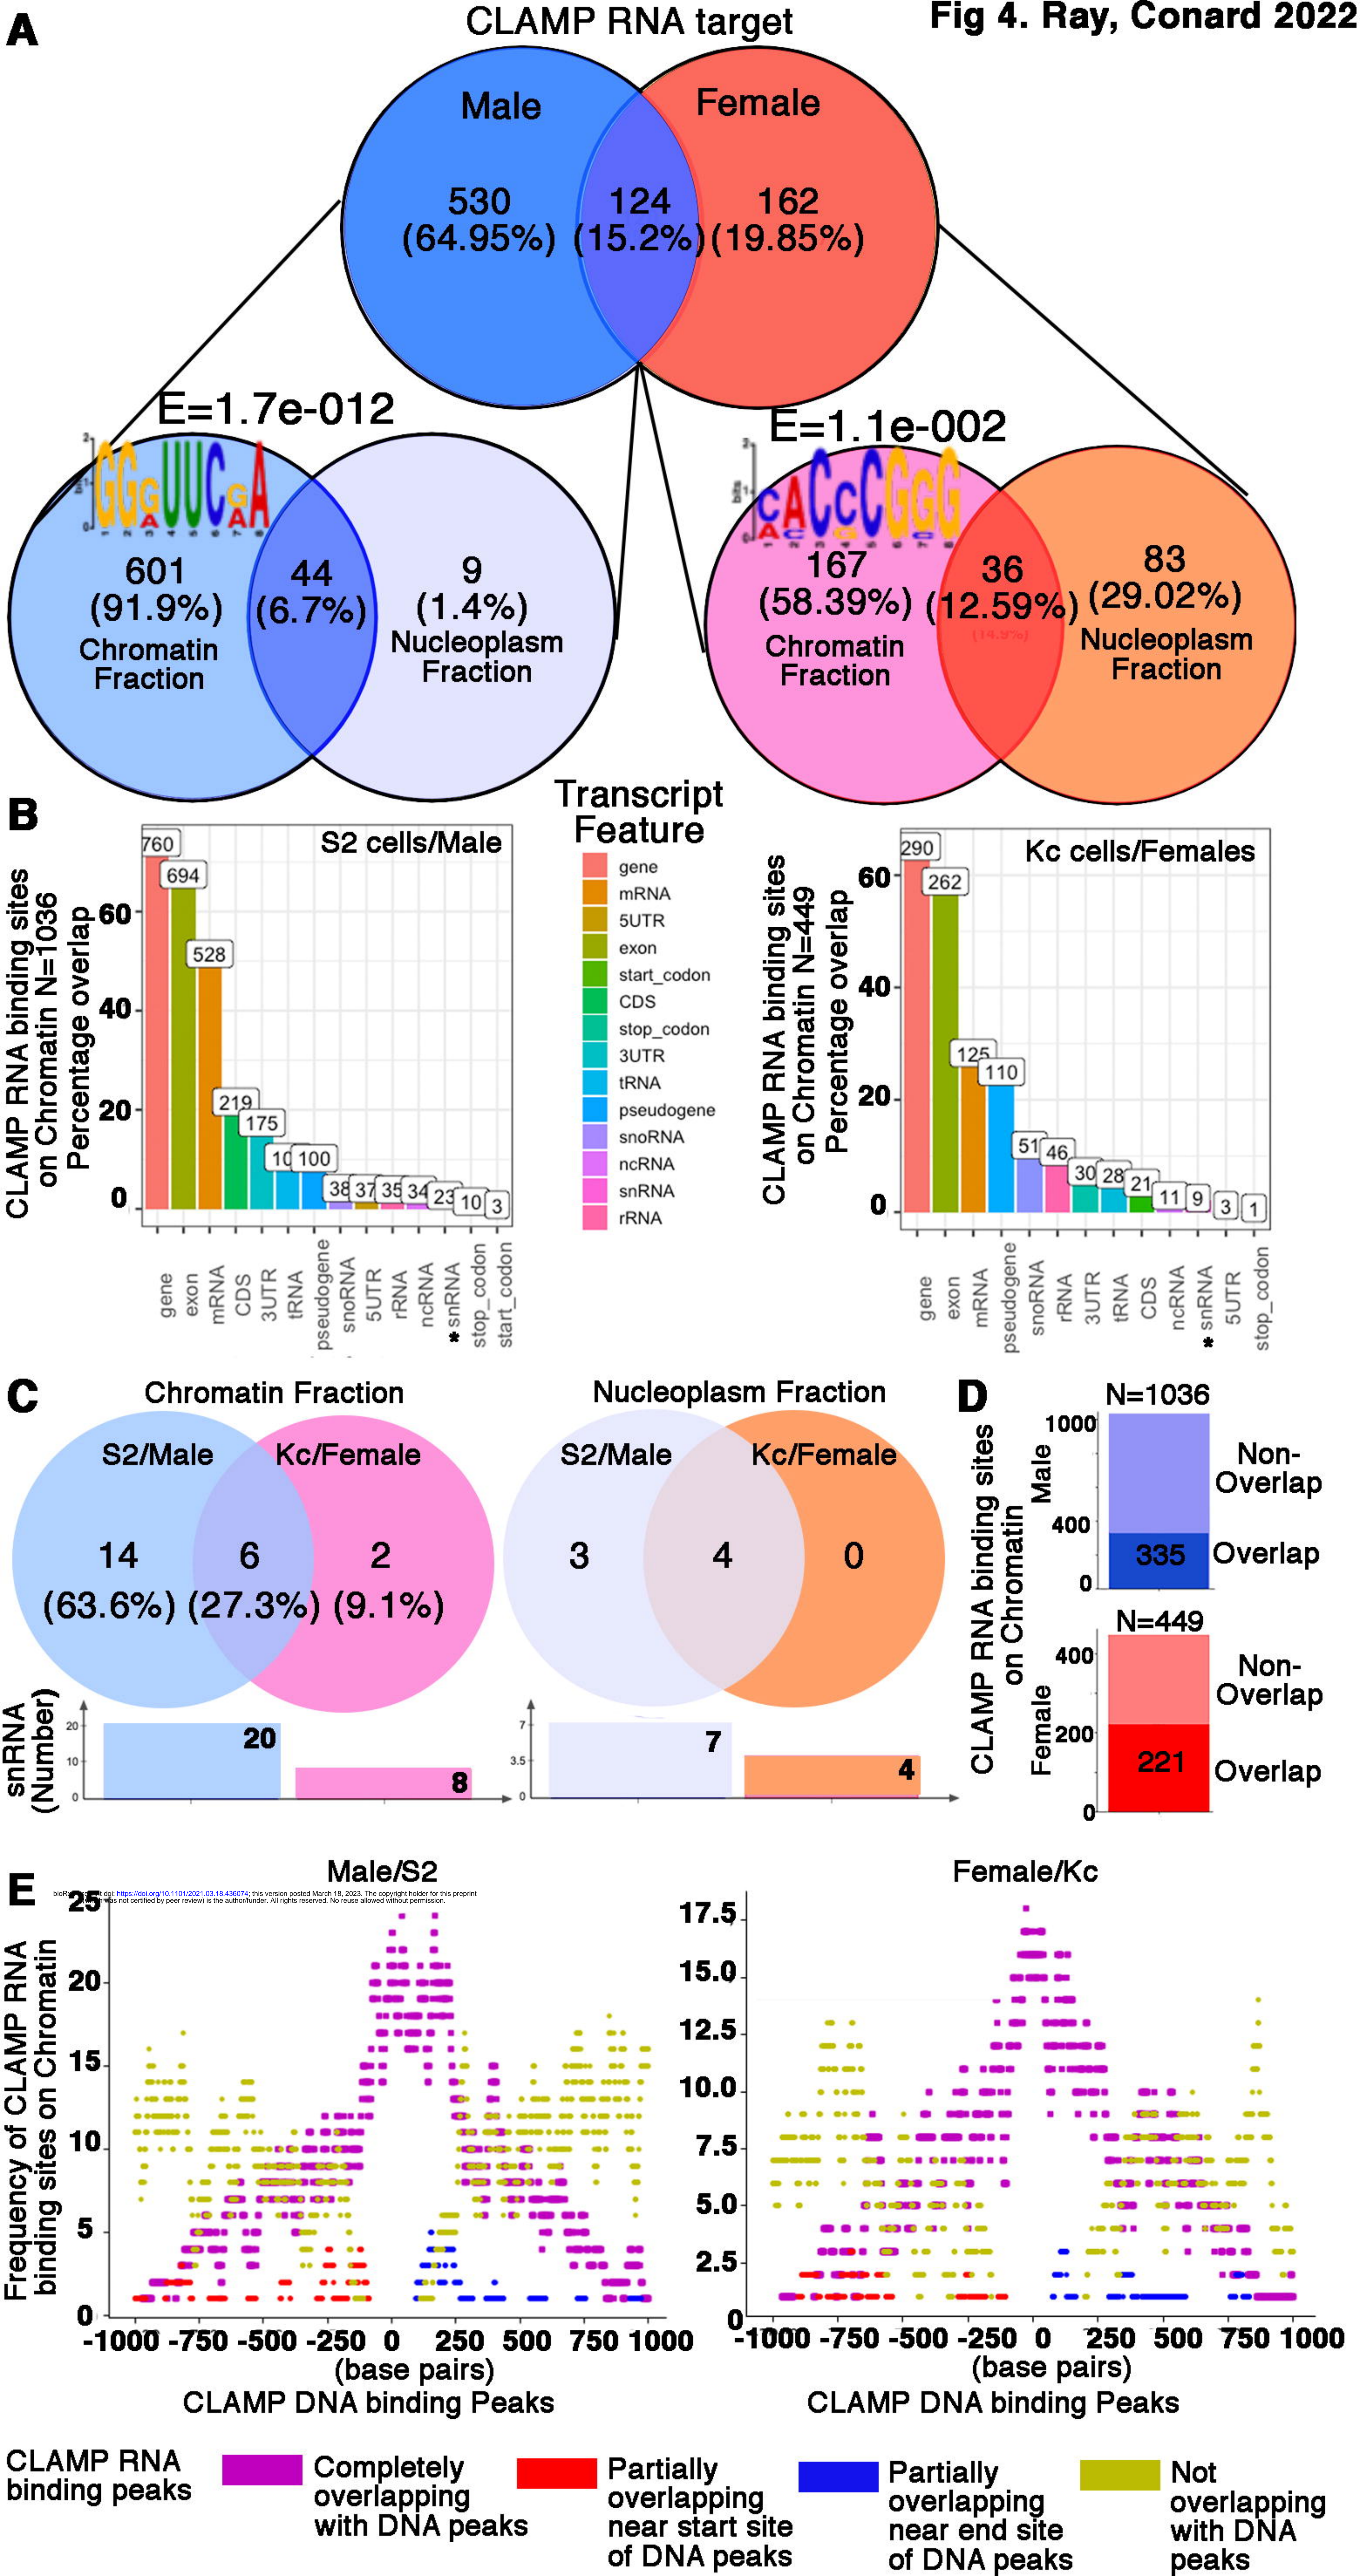

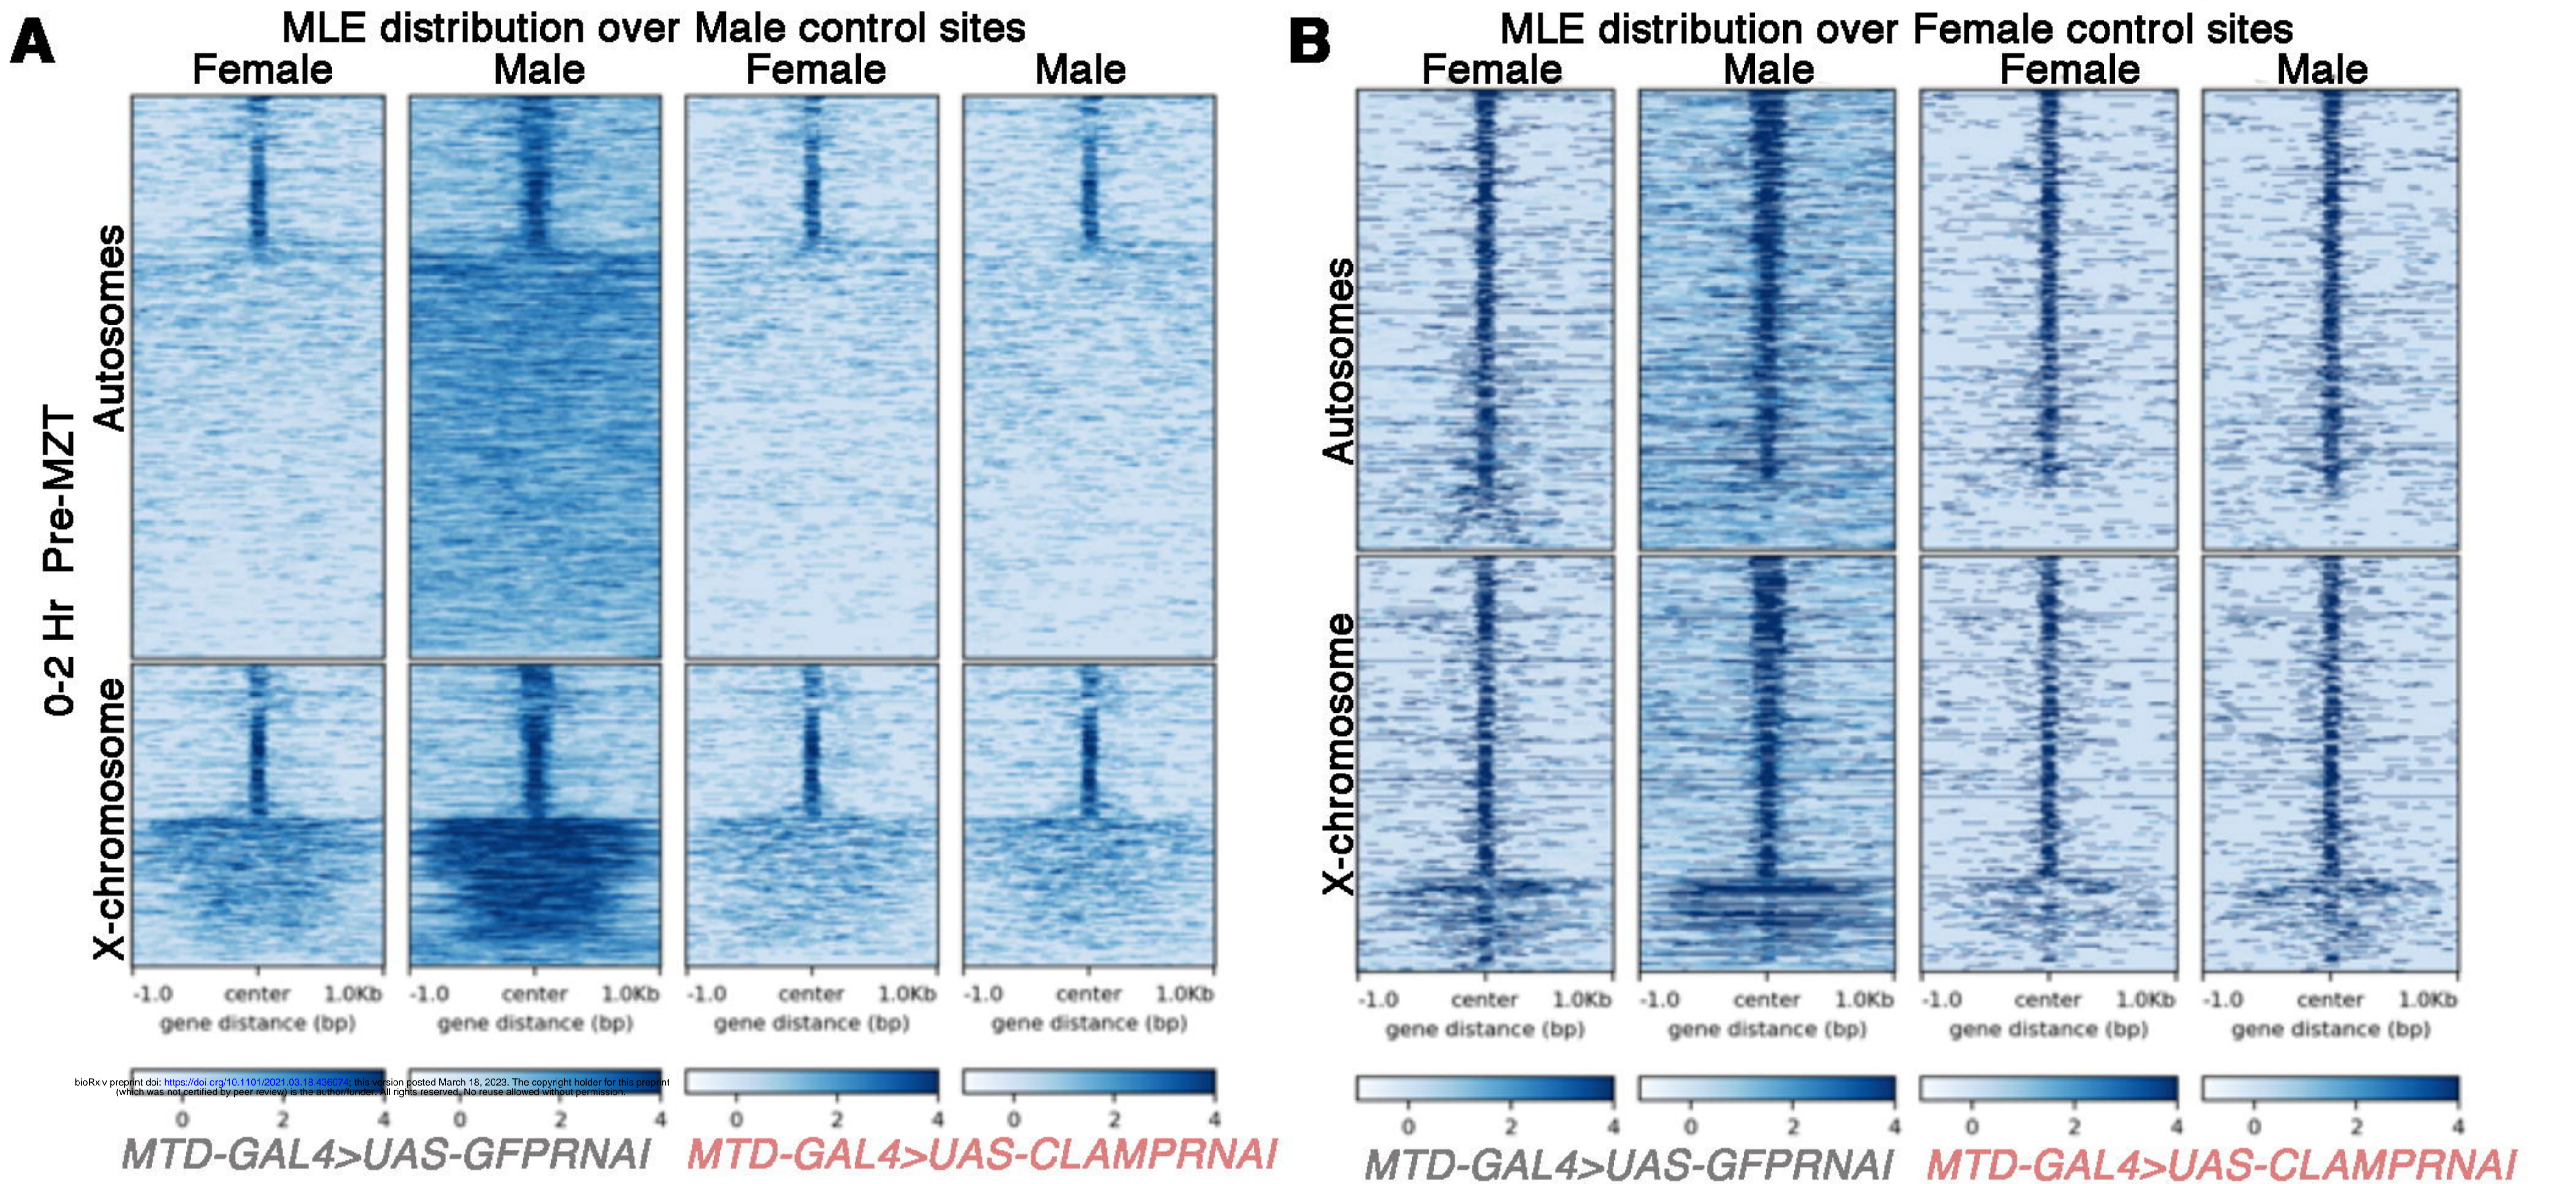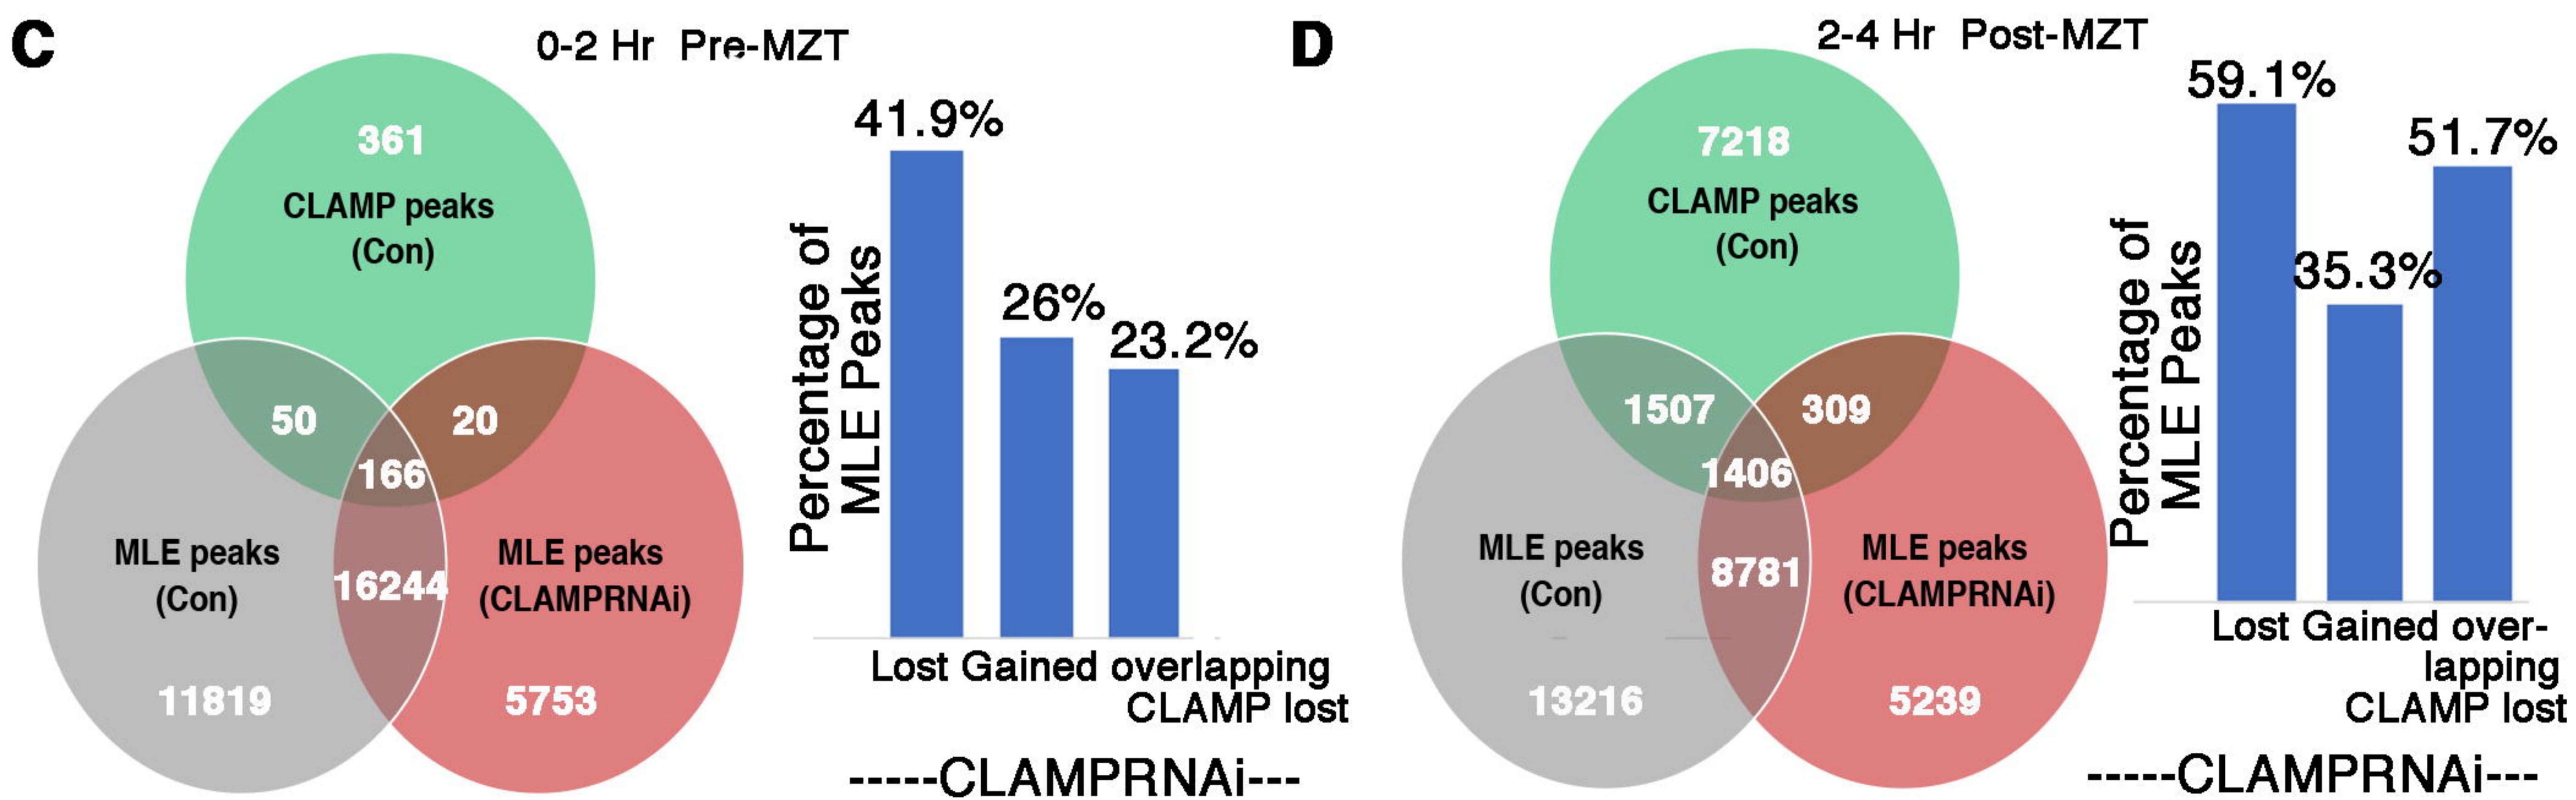

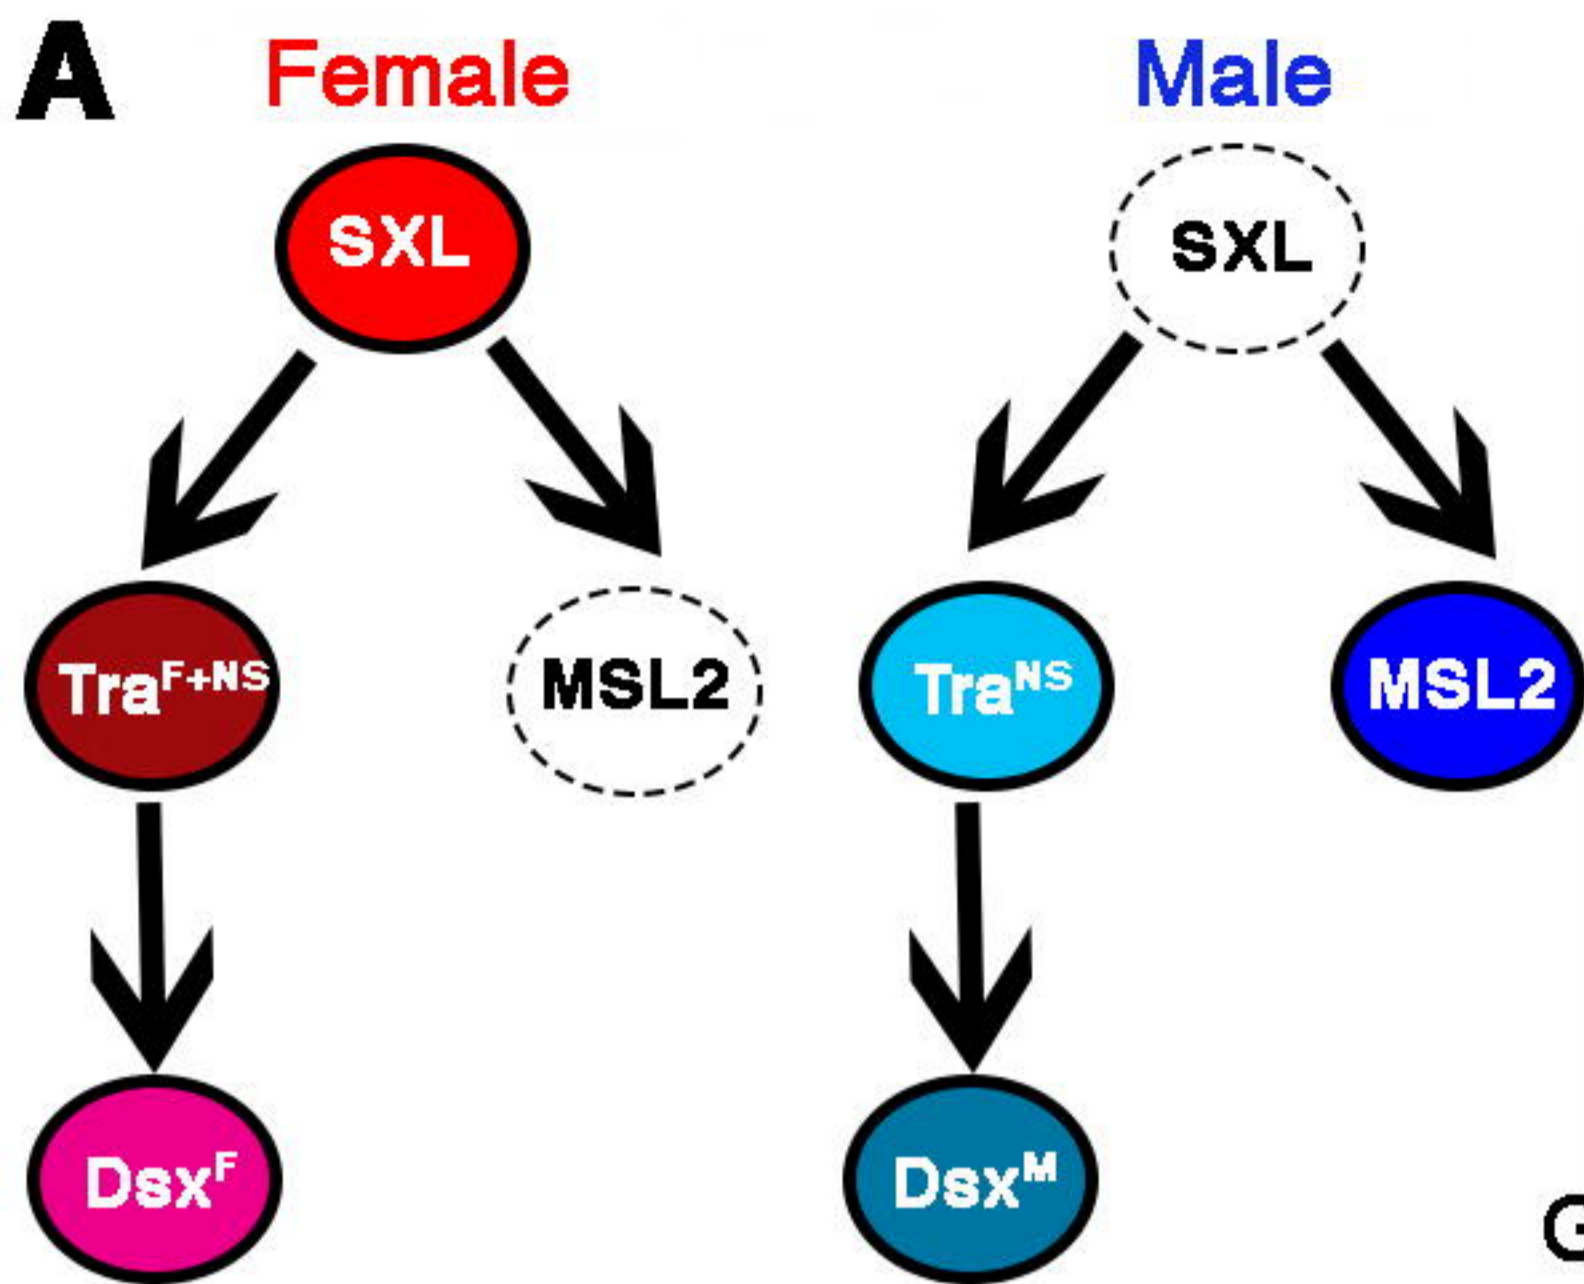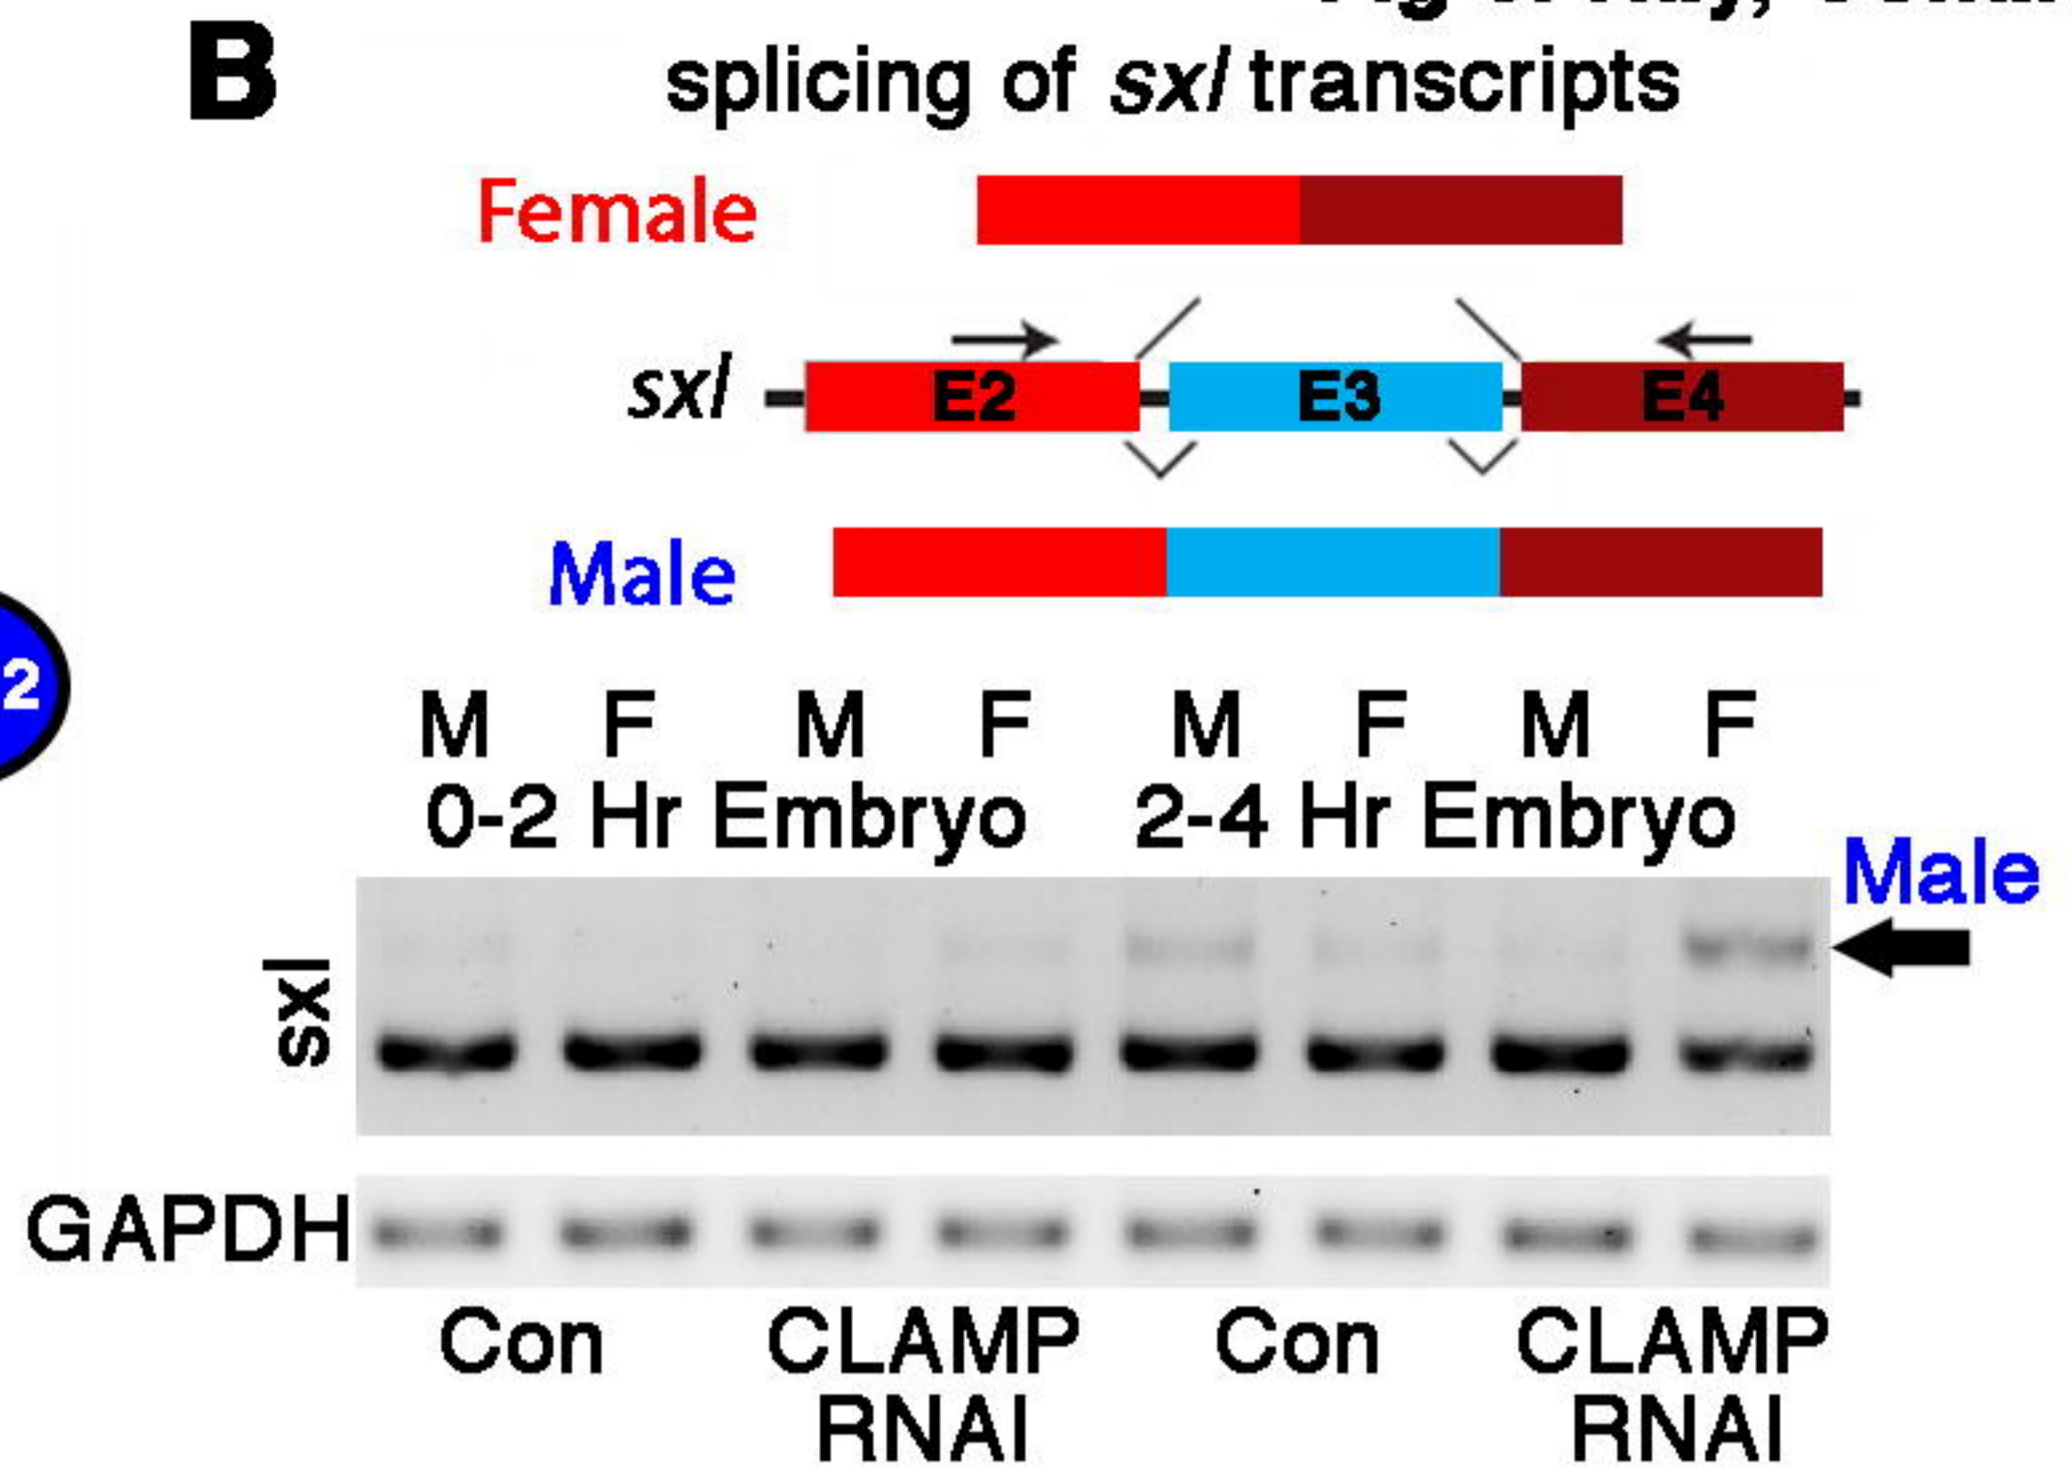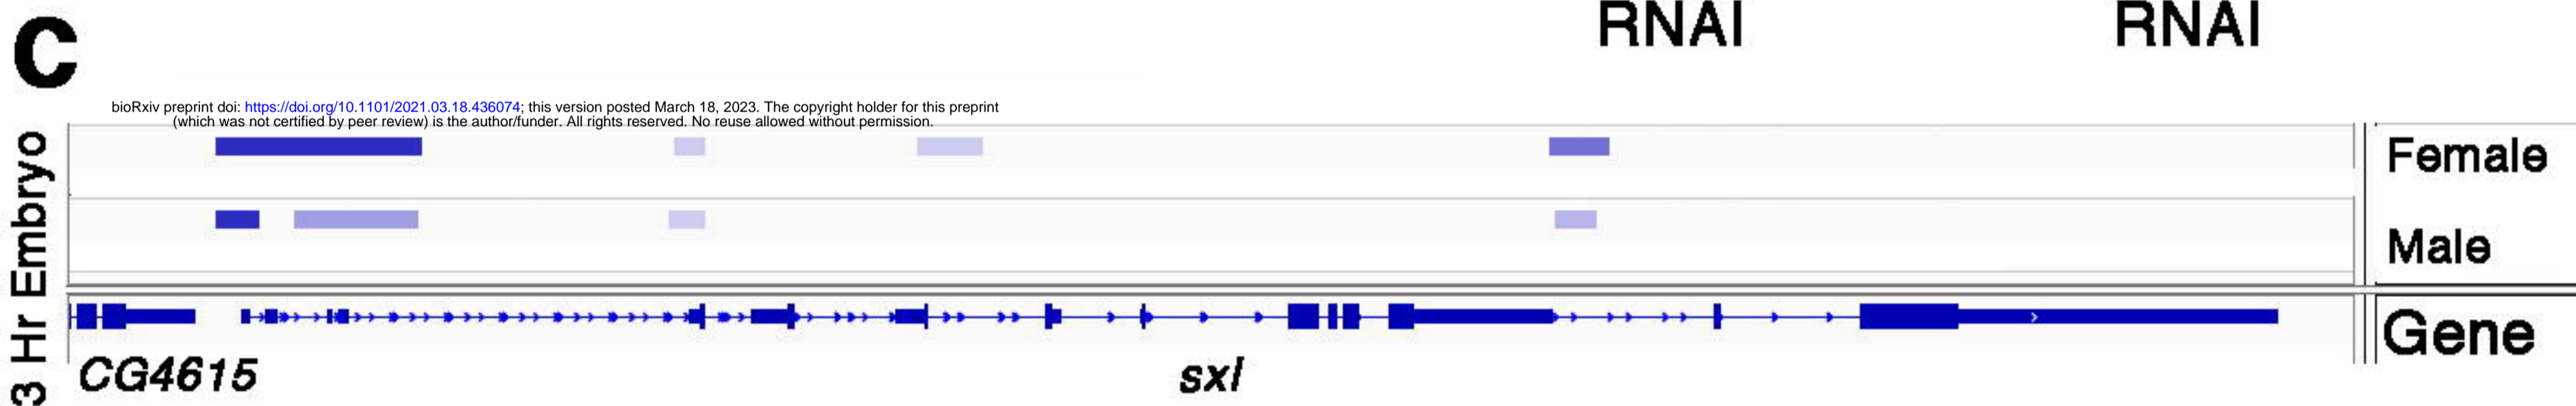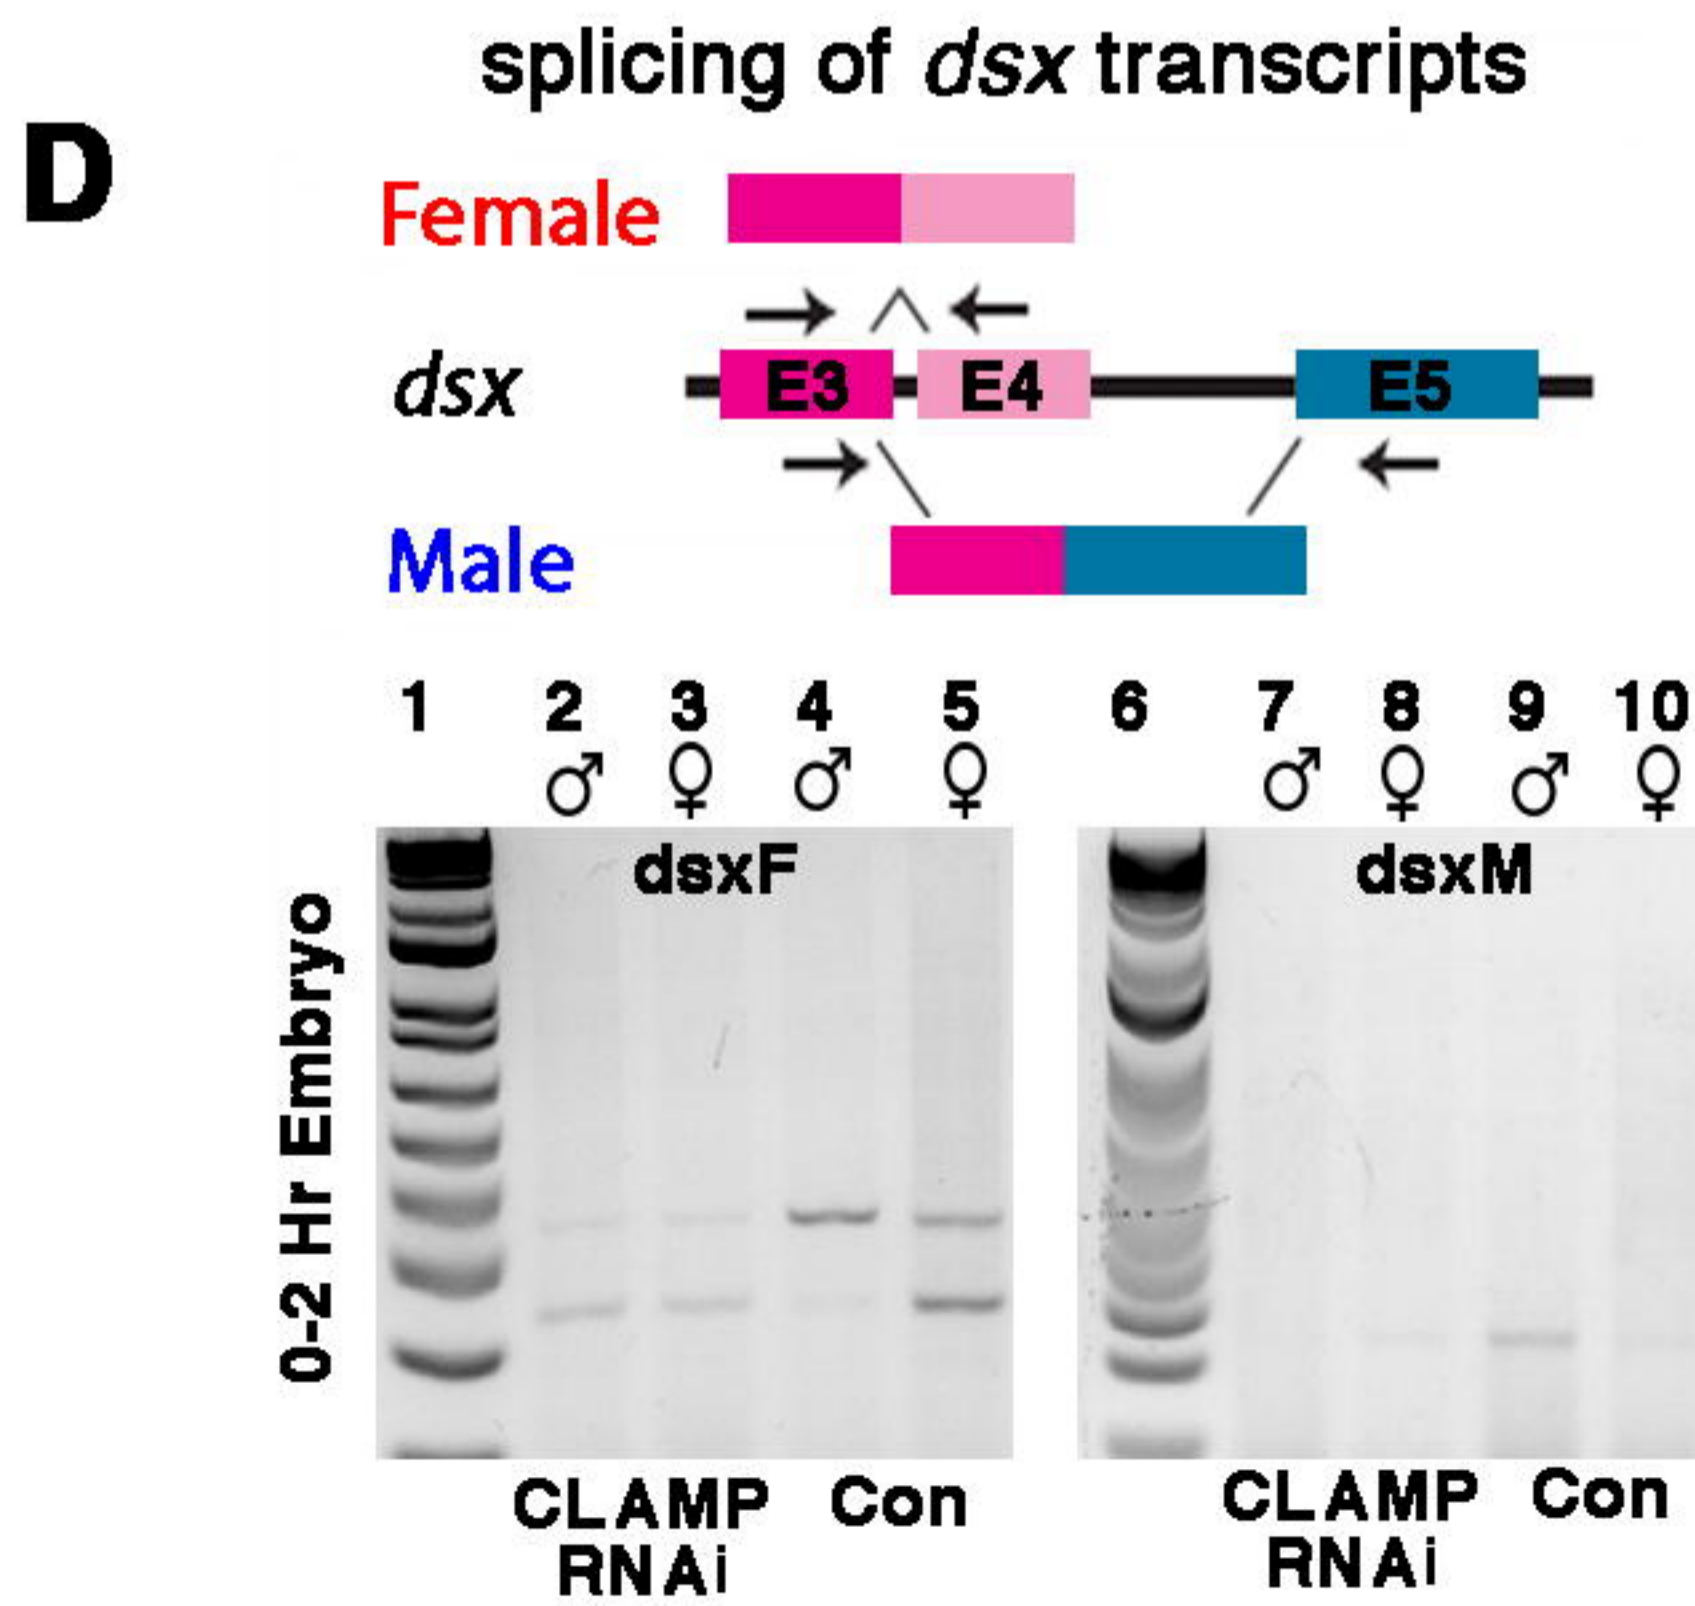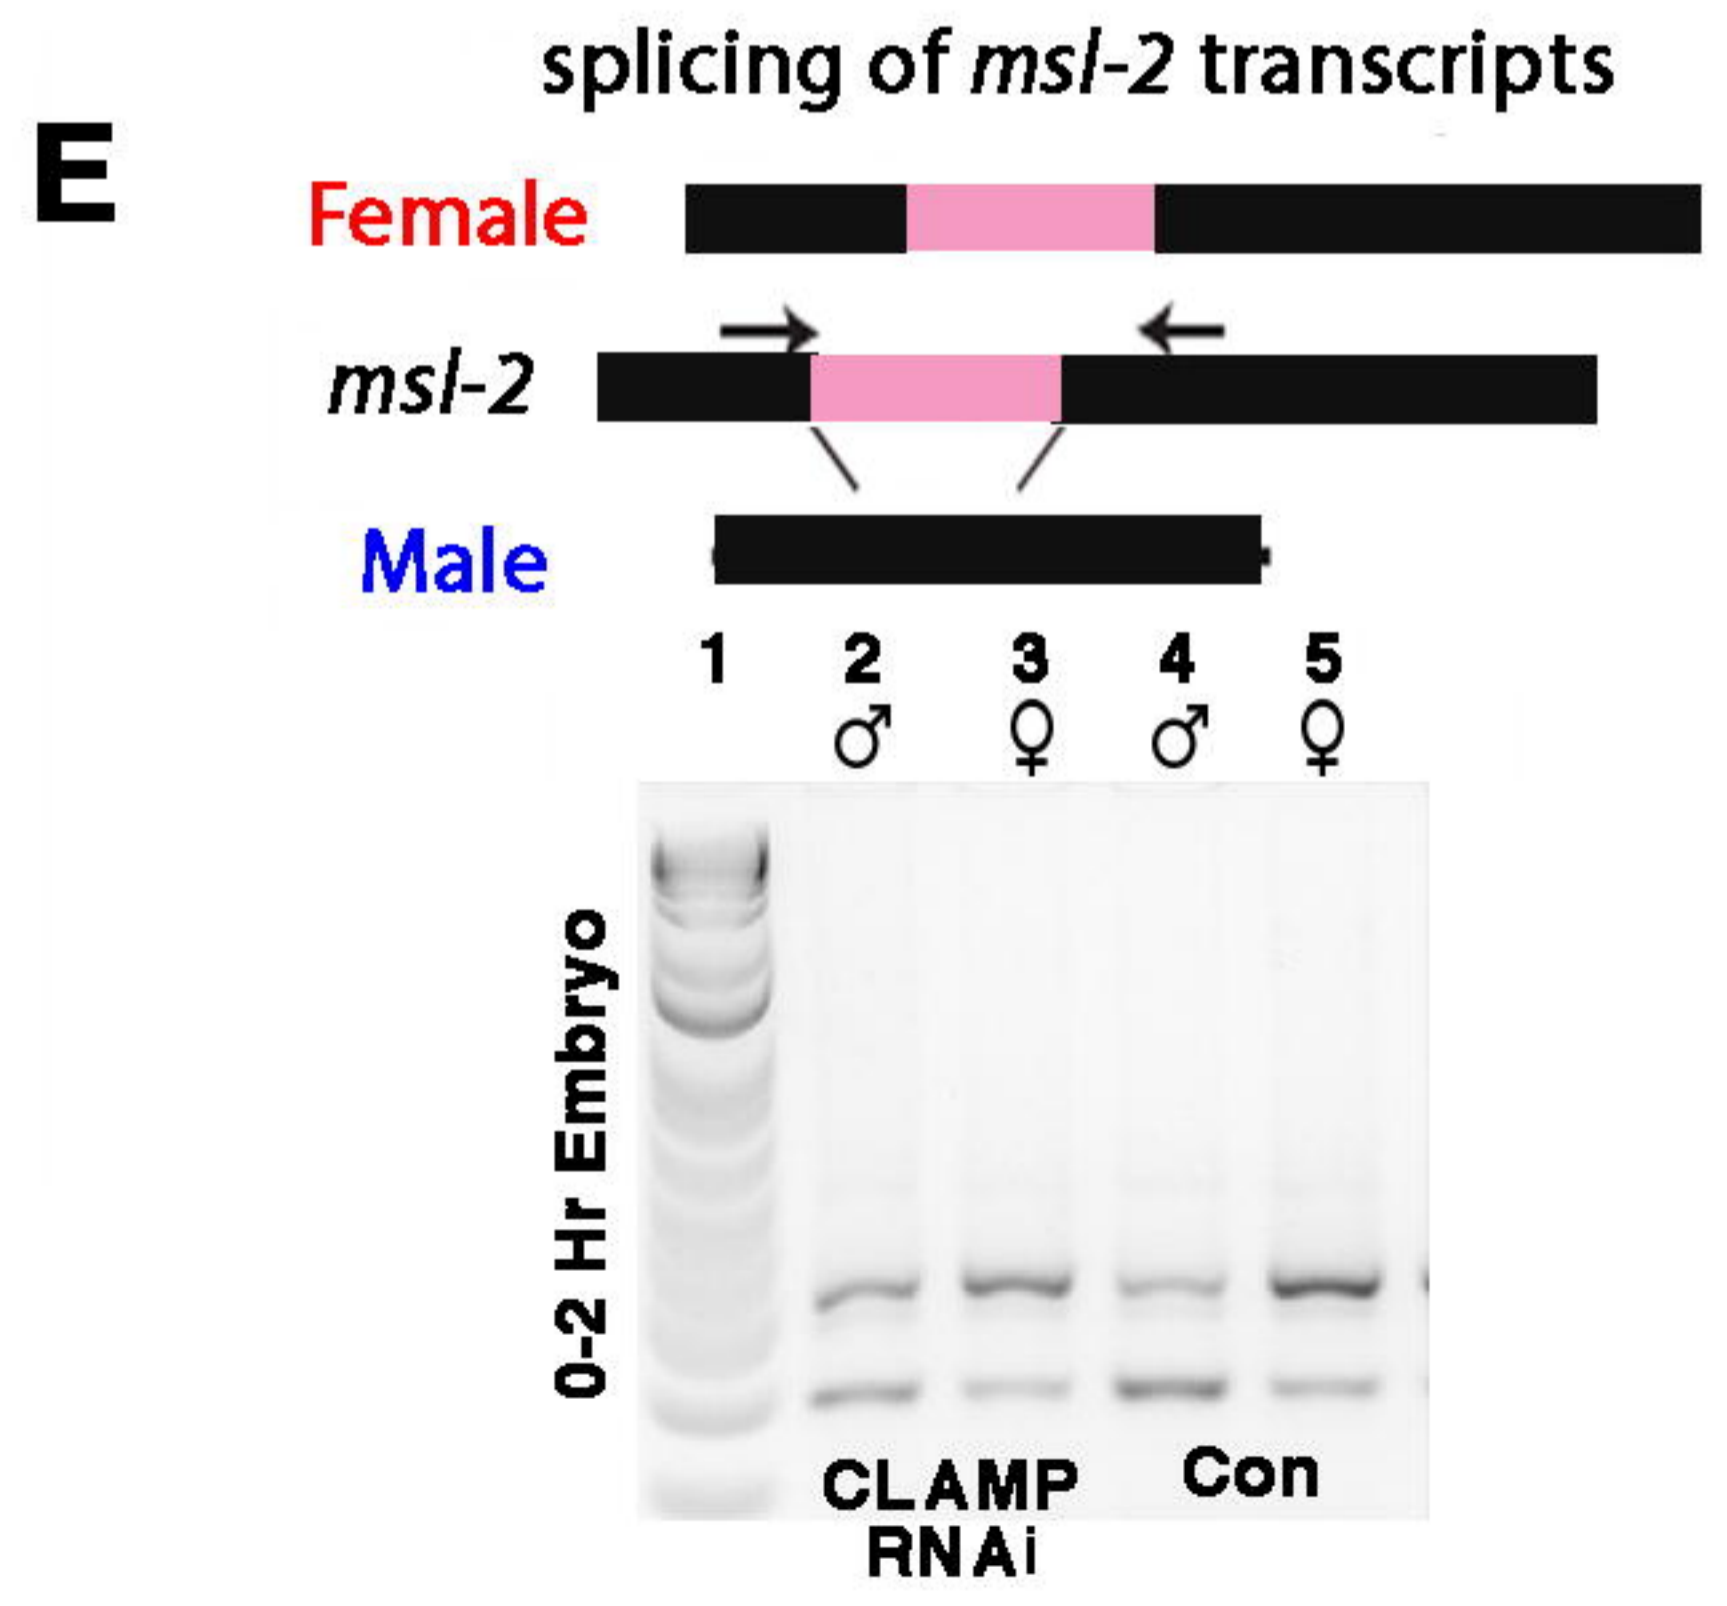

**A**

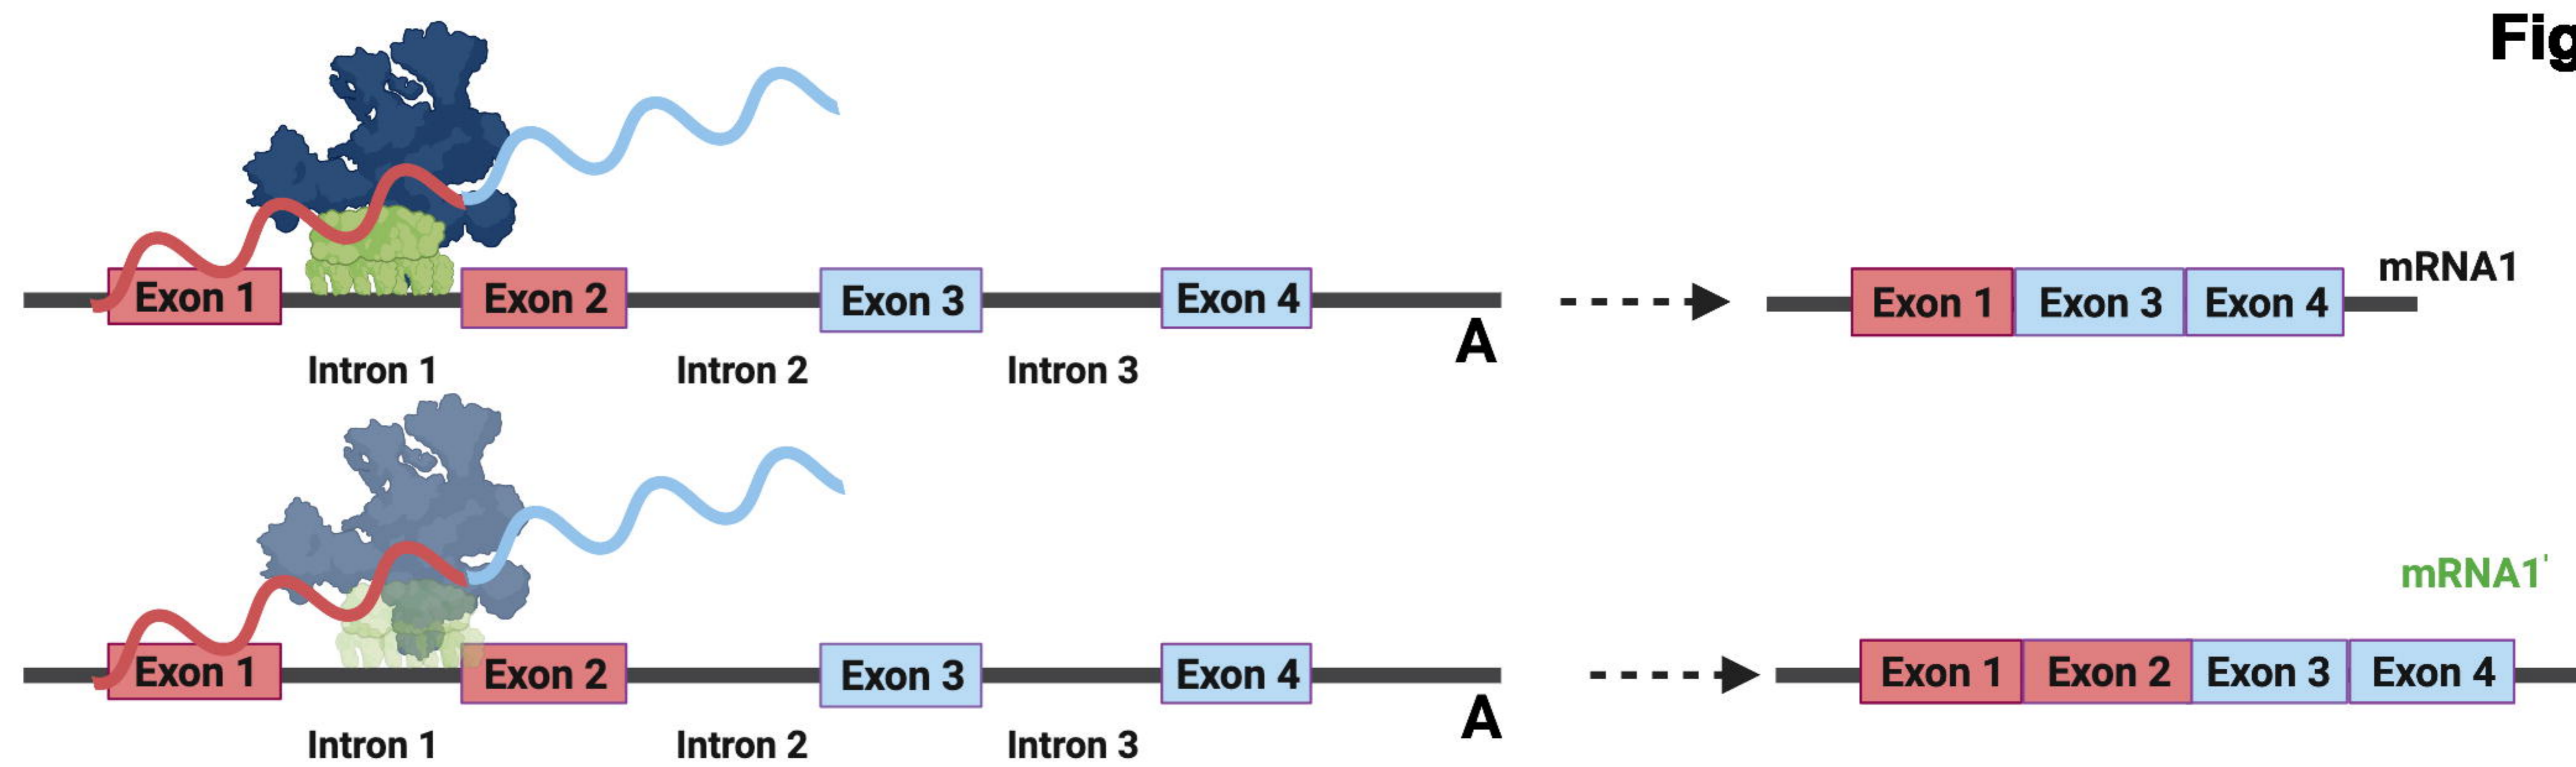

**B**

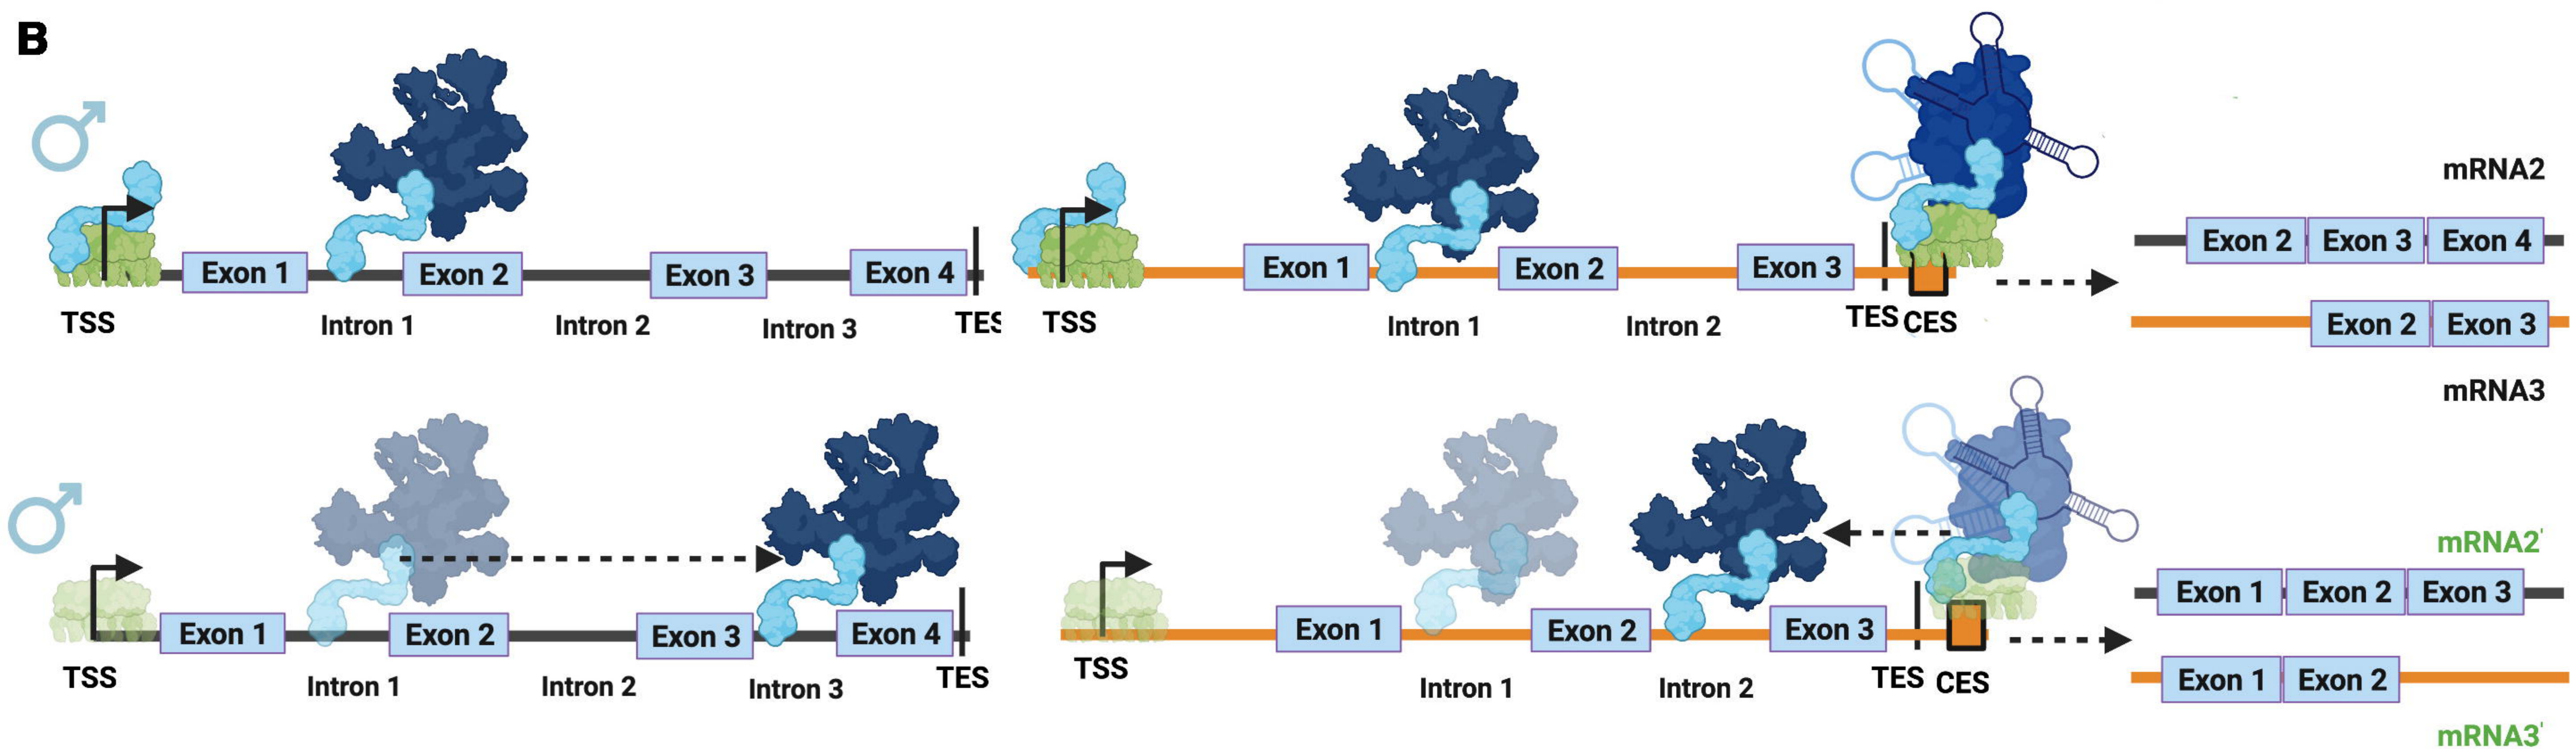

**C**

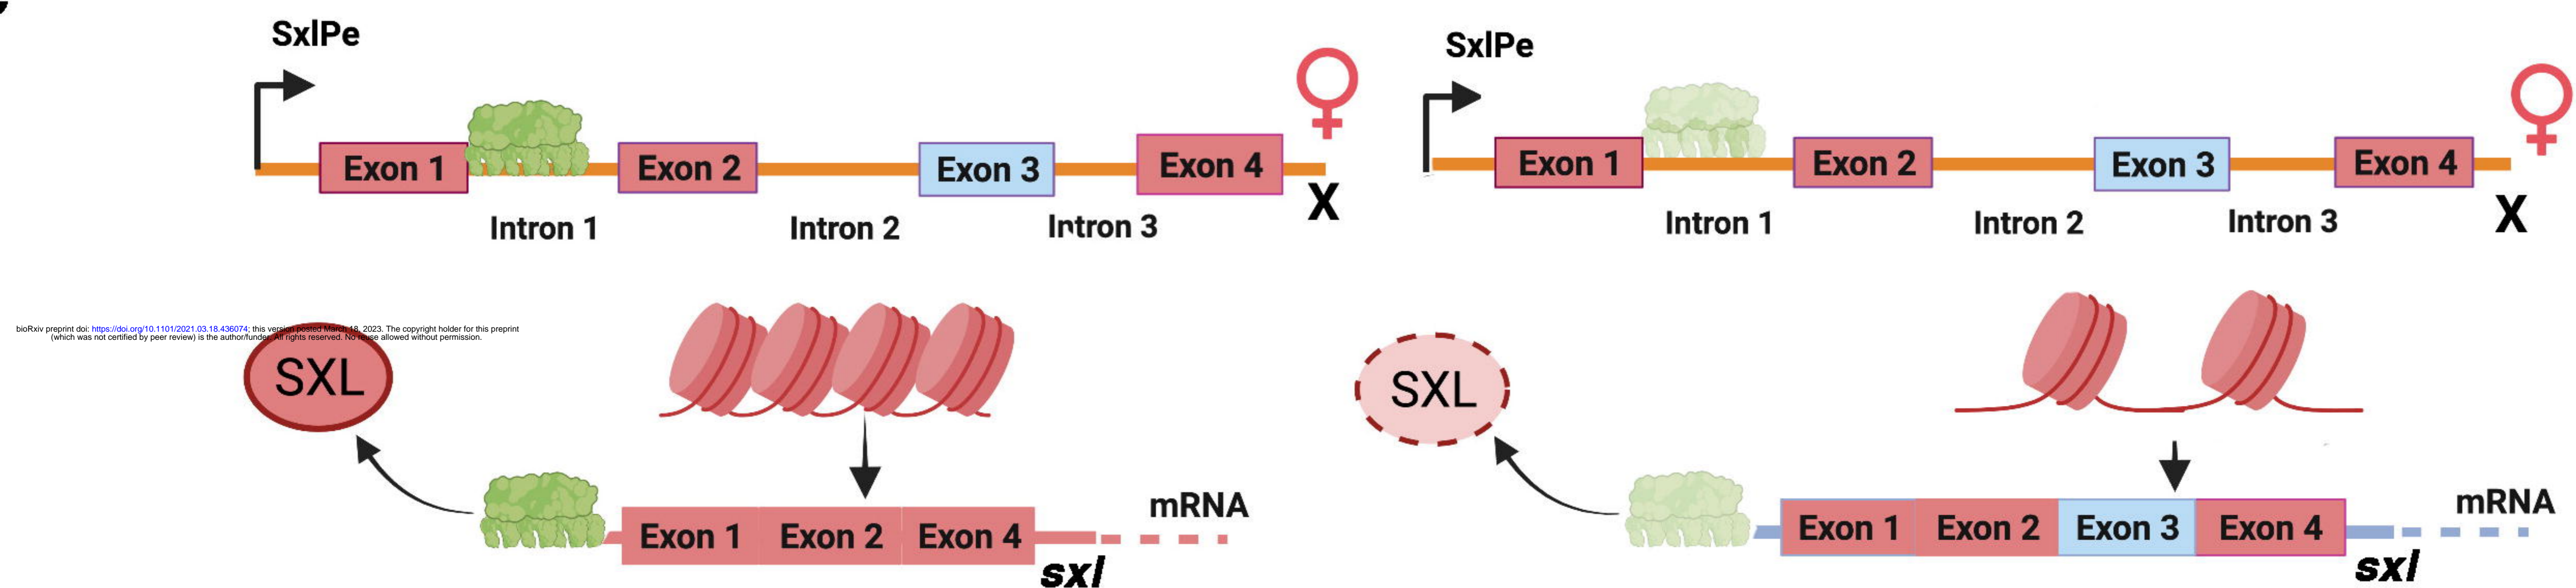

bioRxiv preprint doi: <https://doi.org/10.1101/2021.03.18.436074>; this version posted March 18, 2023. The copyright holder for this preprint (which was not certified by peer review) is the author/funder, who has granted bioRxiv a license to display the preprint in perpetuity. It is made available under aCC-BY-NC-ND 4.0 International license.

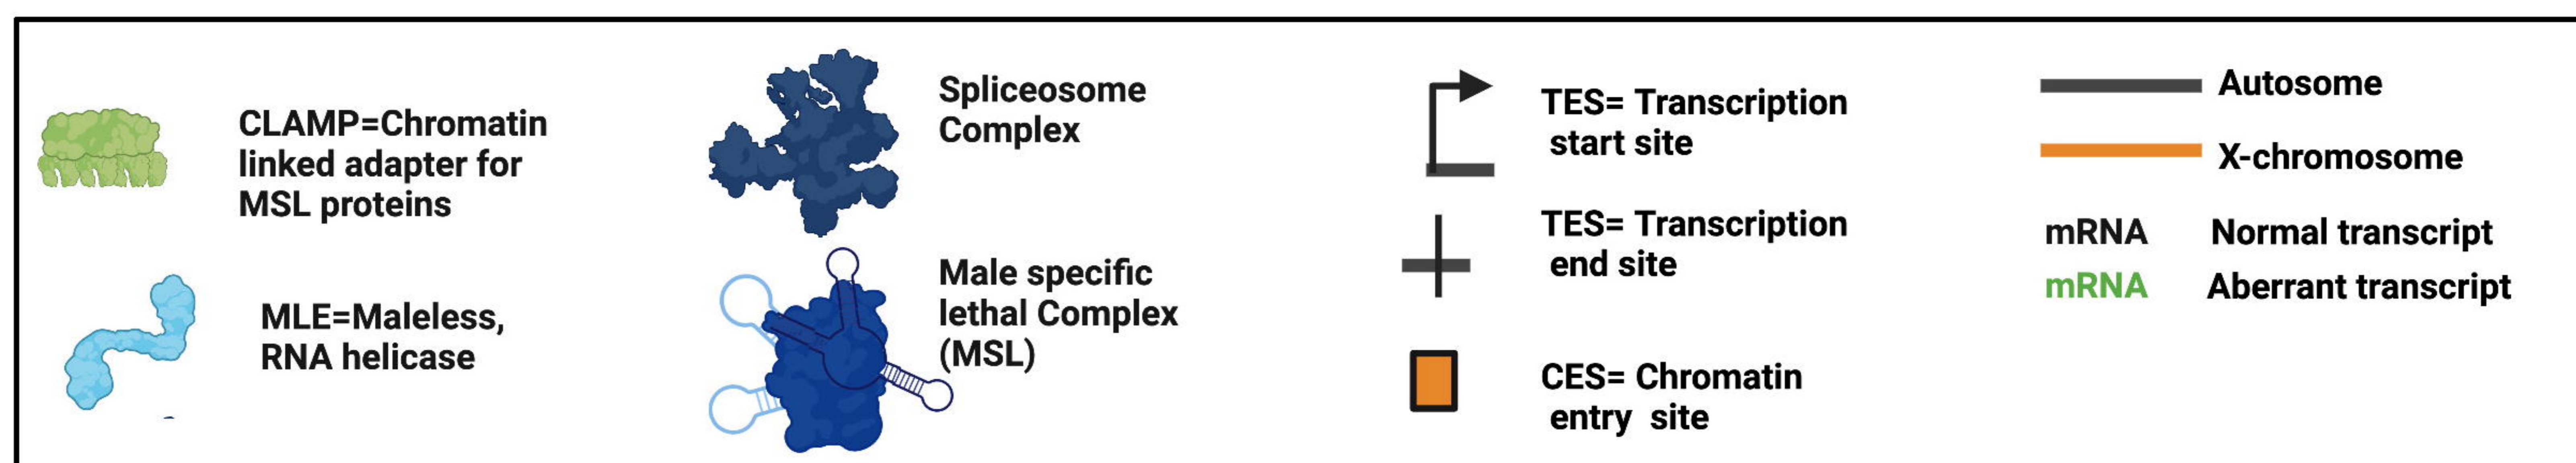

**A. Retrieve raw data, quality control, trim, and alignment**

Run as needed. Note enumeration follows script names.

**1. Retrieve data**

Creates time2splice/ folder structure, metadatafile.csv and SraAccList.txt. .fastqs retrieved using SraAccList.txt.

**2. Run quality control**Run *FastQC* for all .fastq files in time2splice/ directory.**3. Trim data**Run *Trim Galore!*, then *FastQC* to trim reads below quality threshold. Merge lanes of the same flow cell .fastq files.**4/5. Run & plot alignment**Run *Bowtie2*, *BWA*, or *HISAT2* on .fastq data in time2splice directory. Plot alignment for one or two aligners.**B. Temporal expression analysis**

Run as needed. Note enumeration follows script names.

**1. Run transcript quantification**Quantify transcript treatment and control expression with *Salmon*.**2. Run differential splicing analysis**Run *SUPPA* differential splicing analysis across case and controls.**3. Format results**

Converts NM\_ gene names to flybase name. Merges outputs.

**4. Identify differential splicing forms***SUPPA* identifies forms of differential splicing (e.g. using PSI and DTU).**5. Calculate total control alternative splicing**

Calculate and plot the proportions of alternative splicing in control samples.

**6. Calculate total case alternative splicing**

Calculate and plot the proportions of alternative splicing in case samples.

**7. Get bias genes**

Retrieve male and female biased genes. Create .beds to plot average profiles.

**8/9. Plot splicing events**

Plots alternative splicing (PSI and DTU), and events in categories (e.g. female sex specific, male new sex specific).

**C. Temporal protein-DNA analysis**

Run as needed. Note enumeration follows script names.

**1. Mark duplicate reads**Run *Picard's MarkDuplicates* in for all .sorted.bam files in a given directory.**2. Call peaks**Run *MACS2* to call peaks for all .sorted.bam files in a given directory.**3. Find fold enrichment**Generate signal track using *MACS2* to profile transcription factor modification enrichment levels genome-wide.**D. Temporal multi-omics integration**

Run as needed. Miscellaneous tests at README end plot peak intensity and perform chi-squared test

**Peak intersections**Run *Intervene* to view intersection of each narrowpeak file.**Gene ontology**Perform gene ontology analysis with *ClusterProfiler* given a list of genes.**Find motifs *denovo***Get coordinates of bed file and run through *MEME*.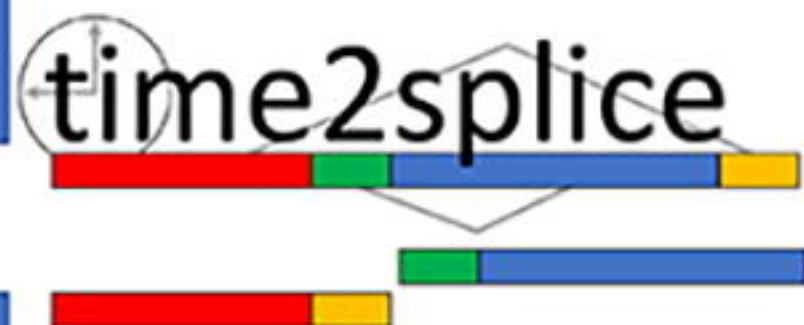

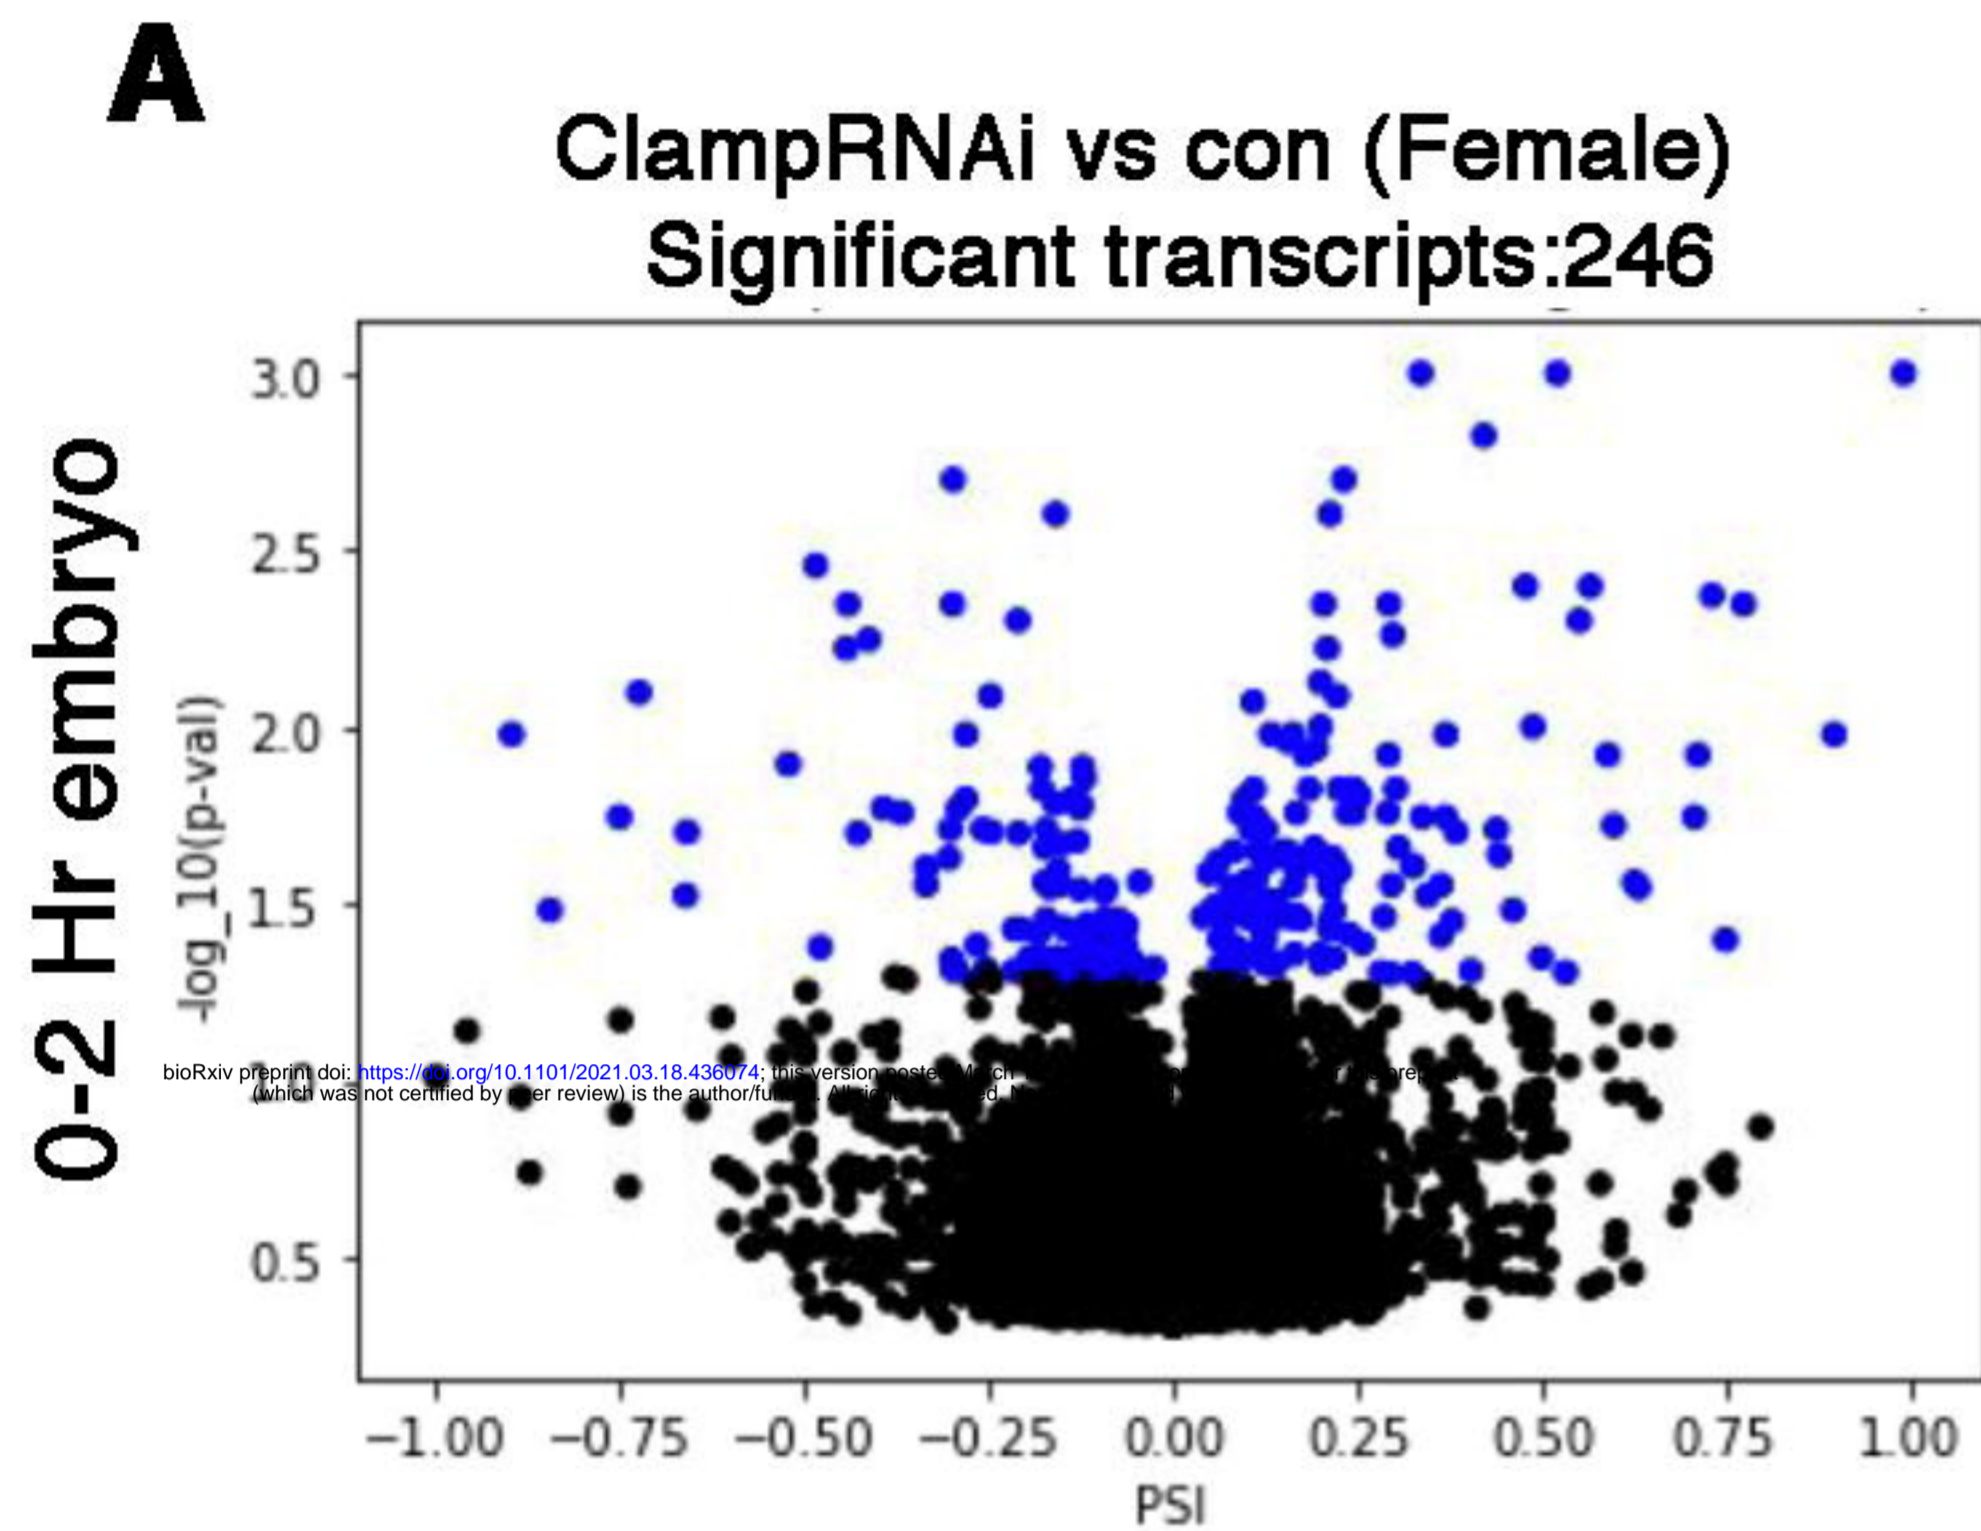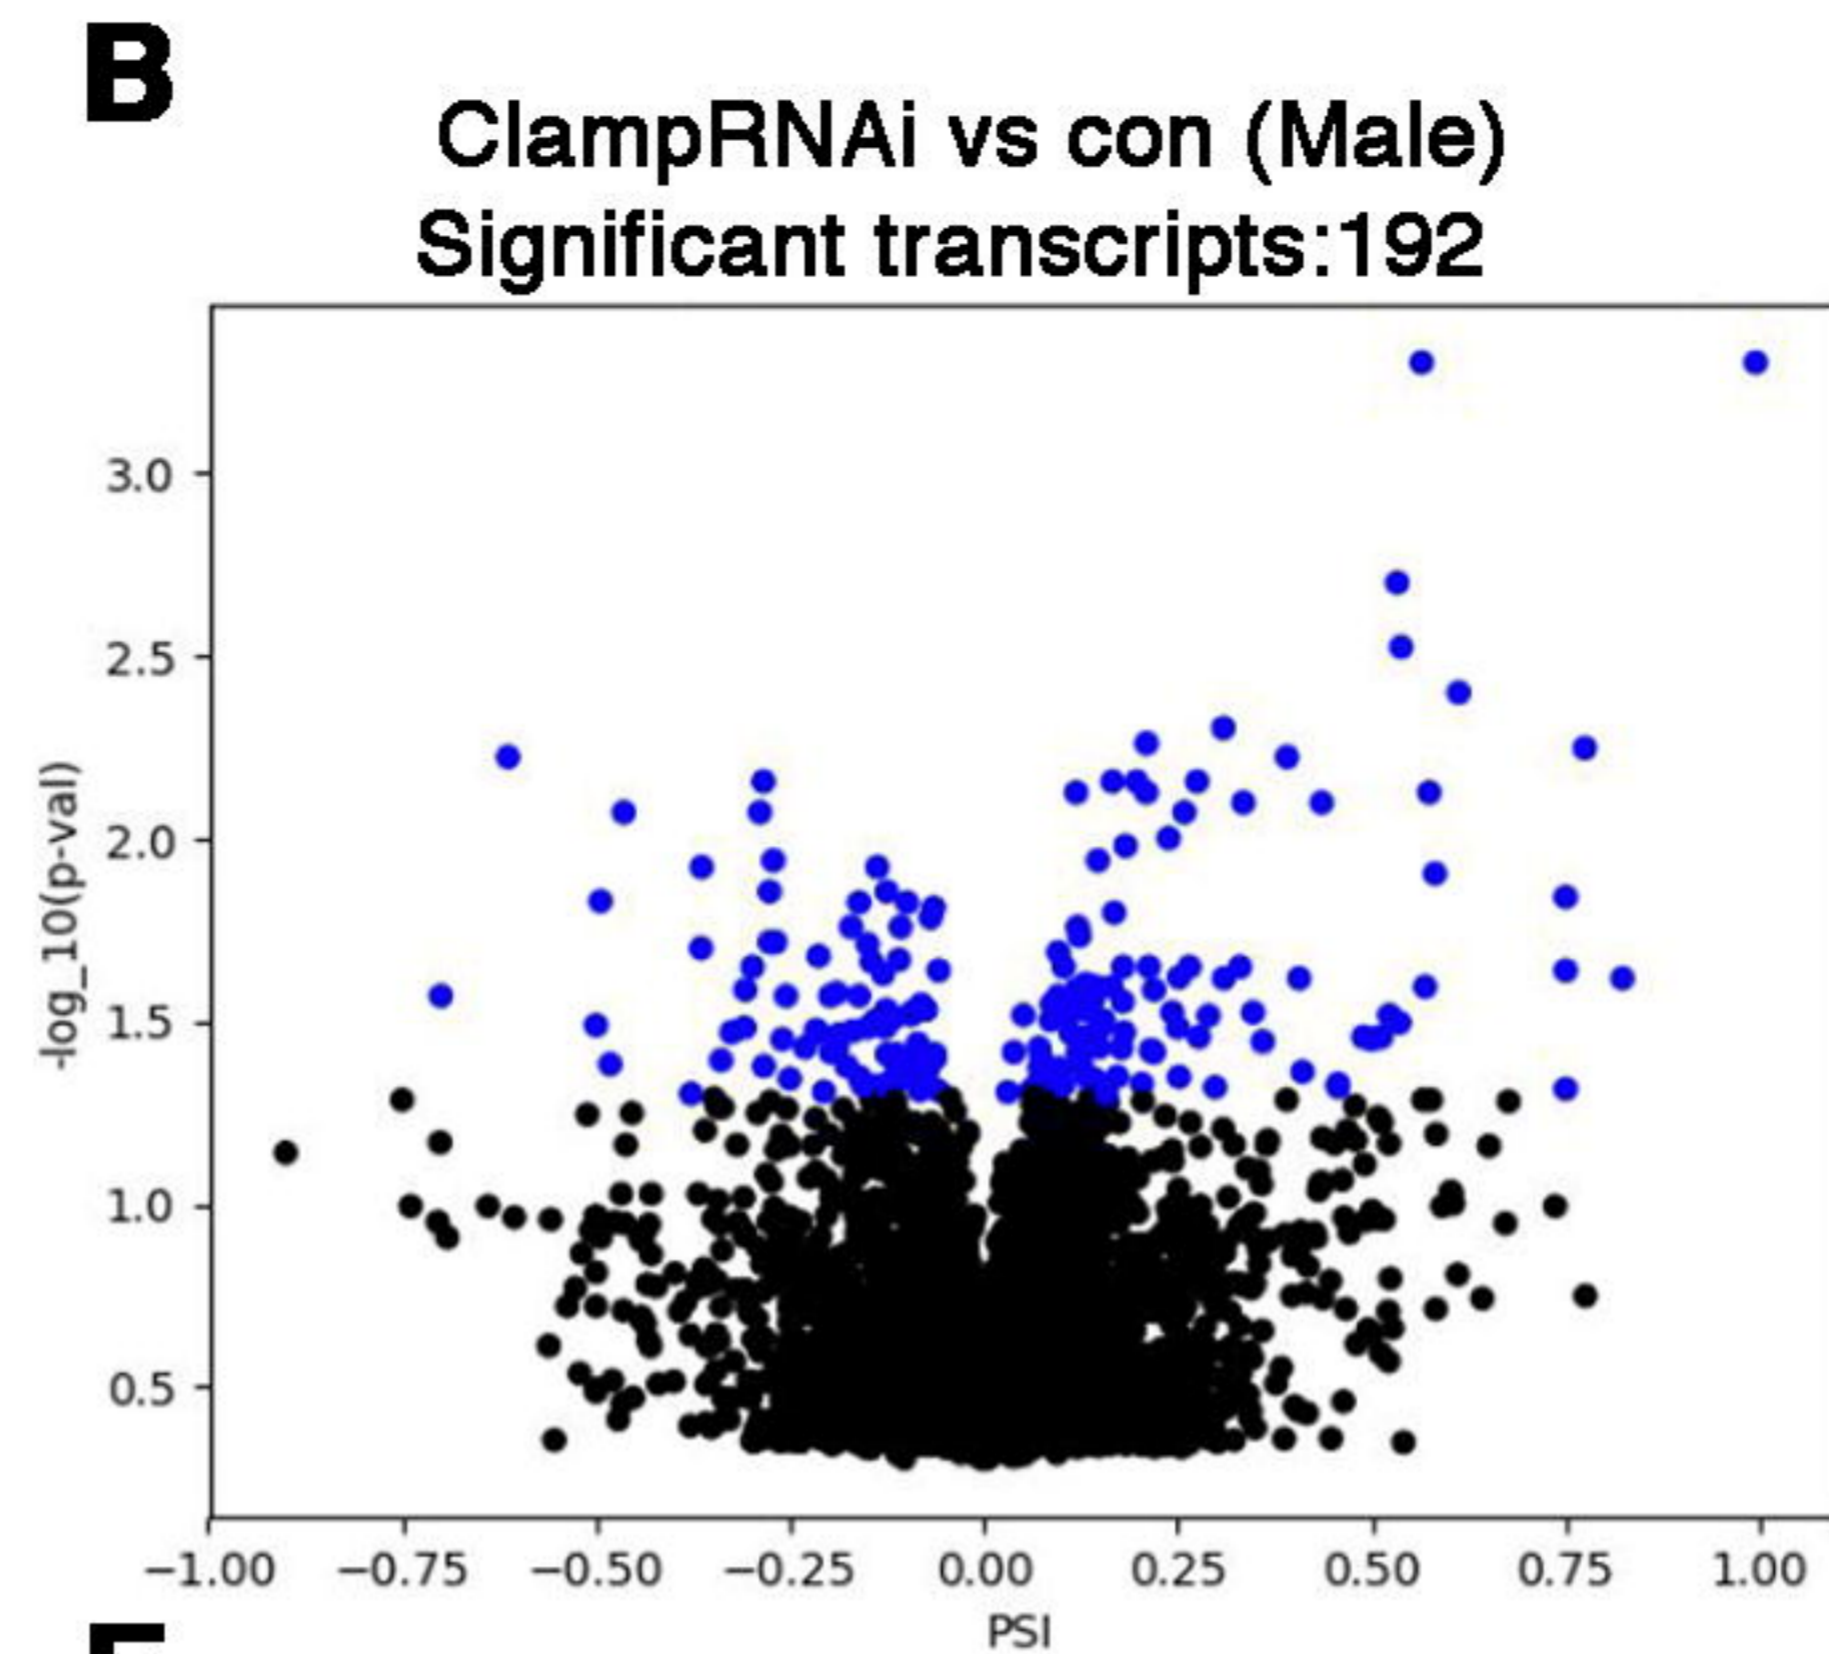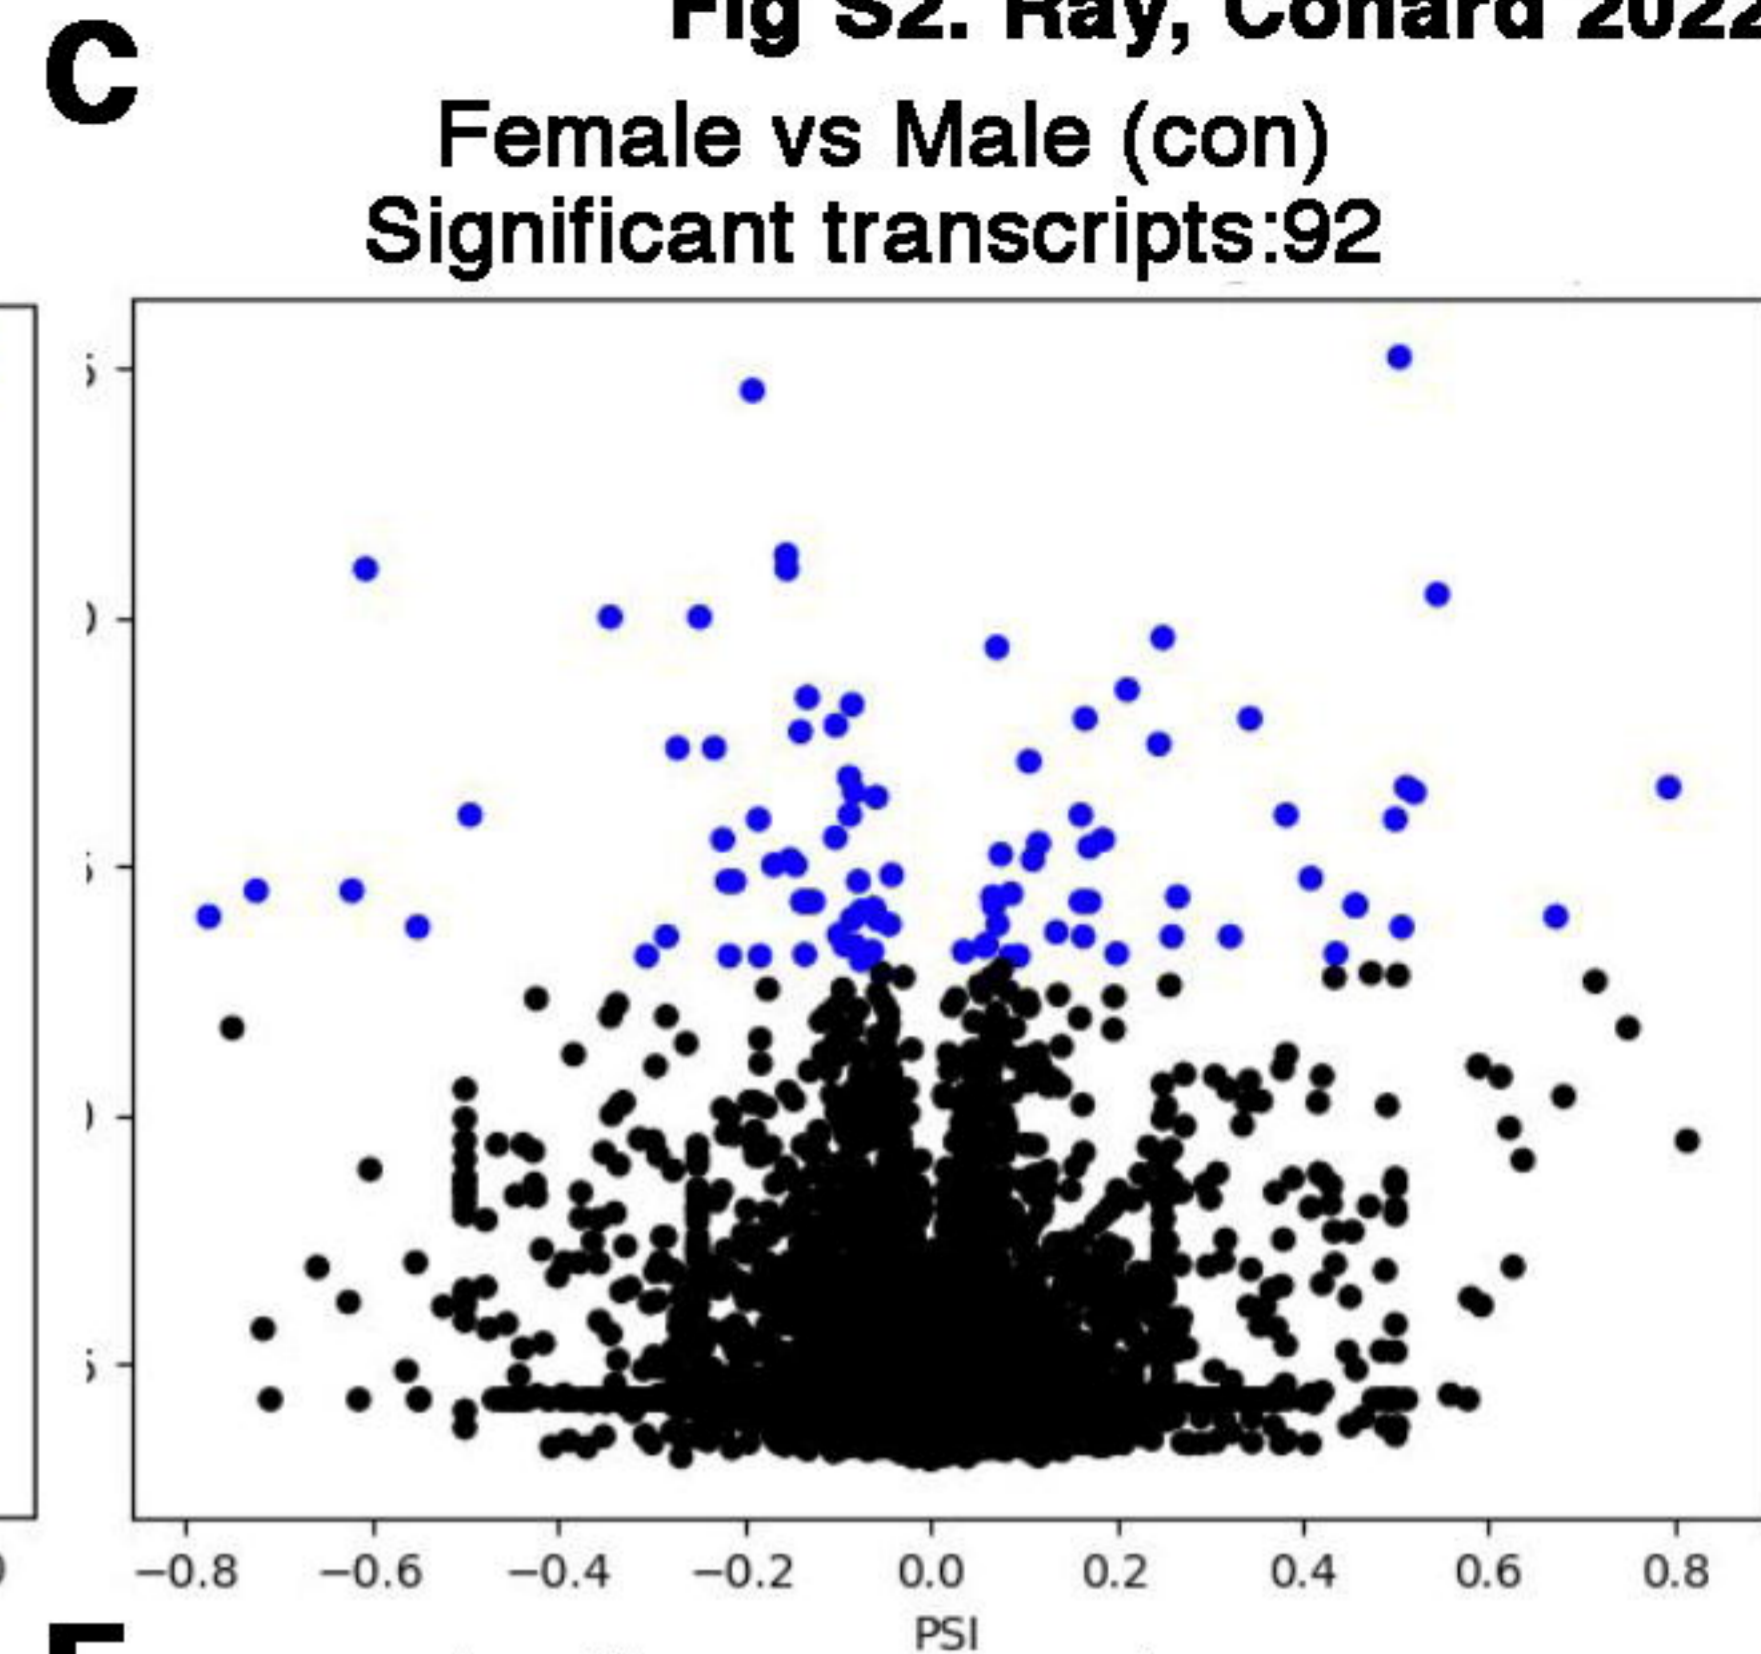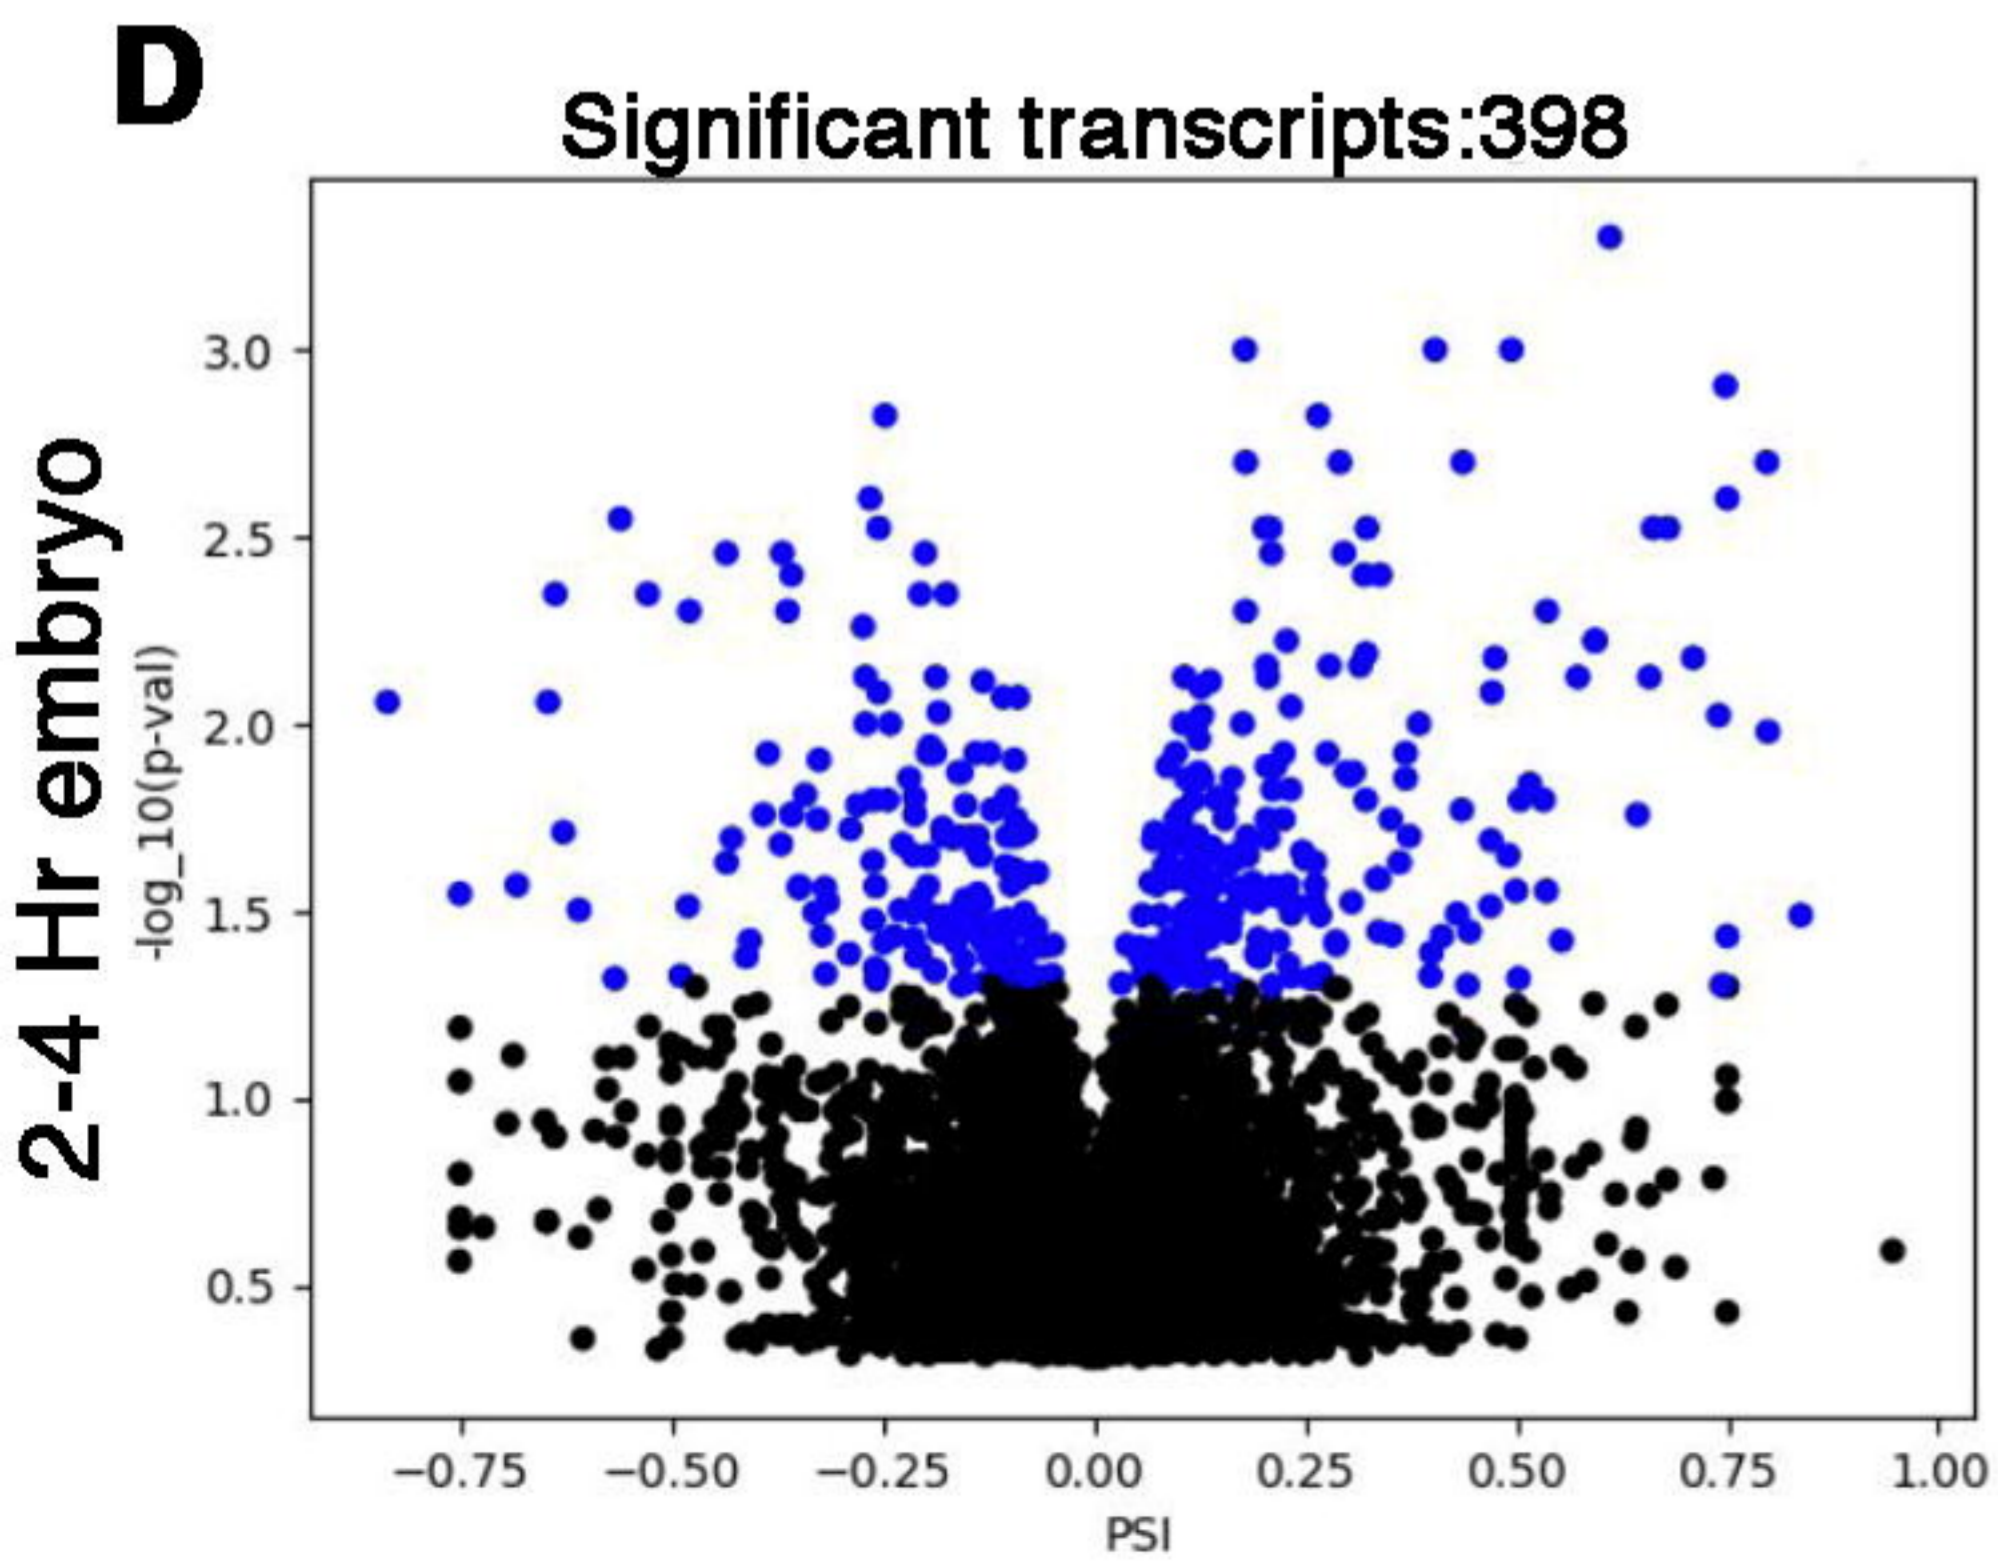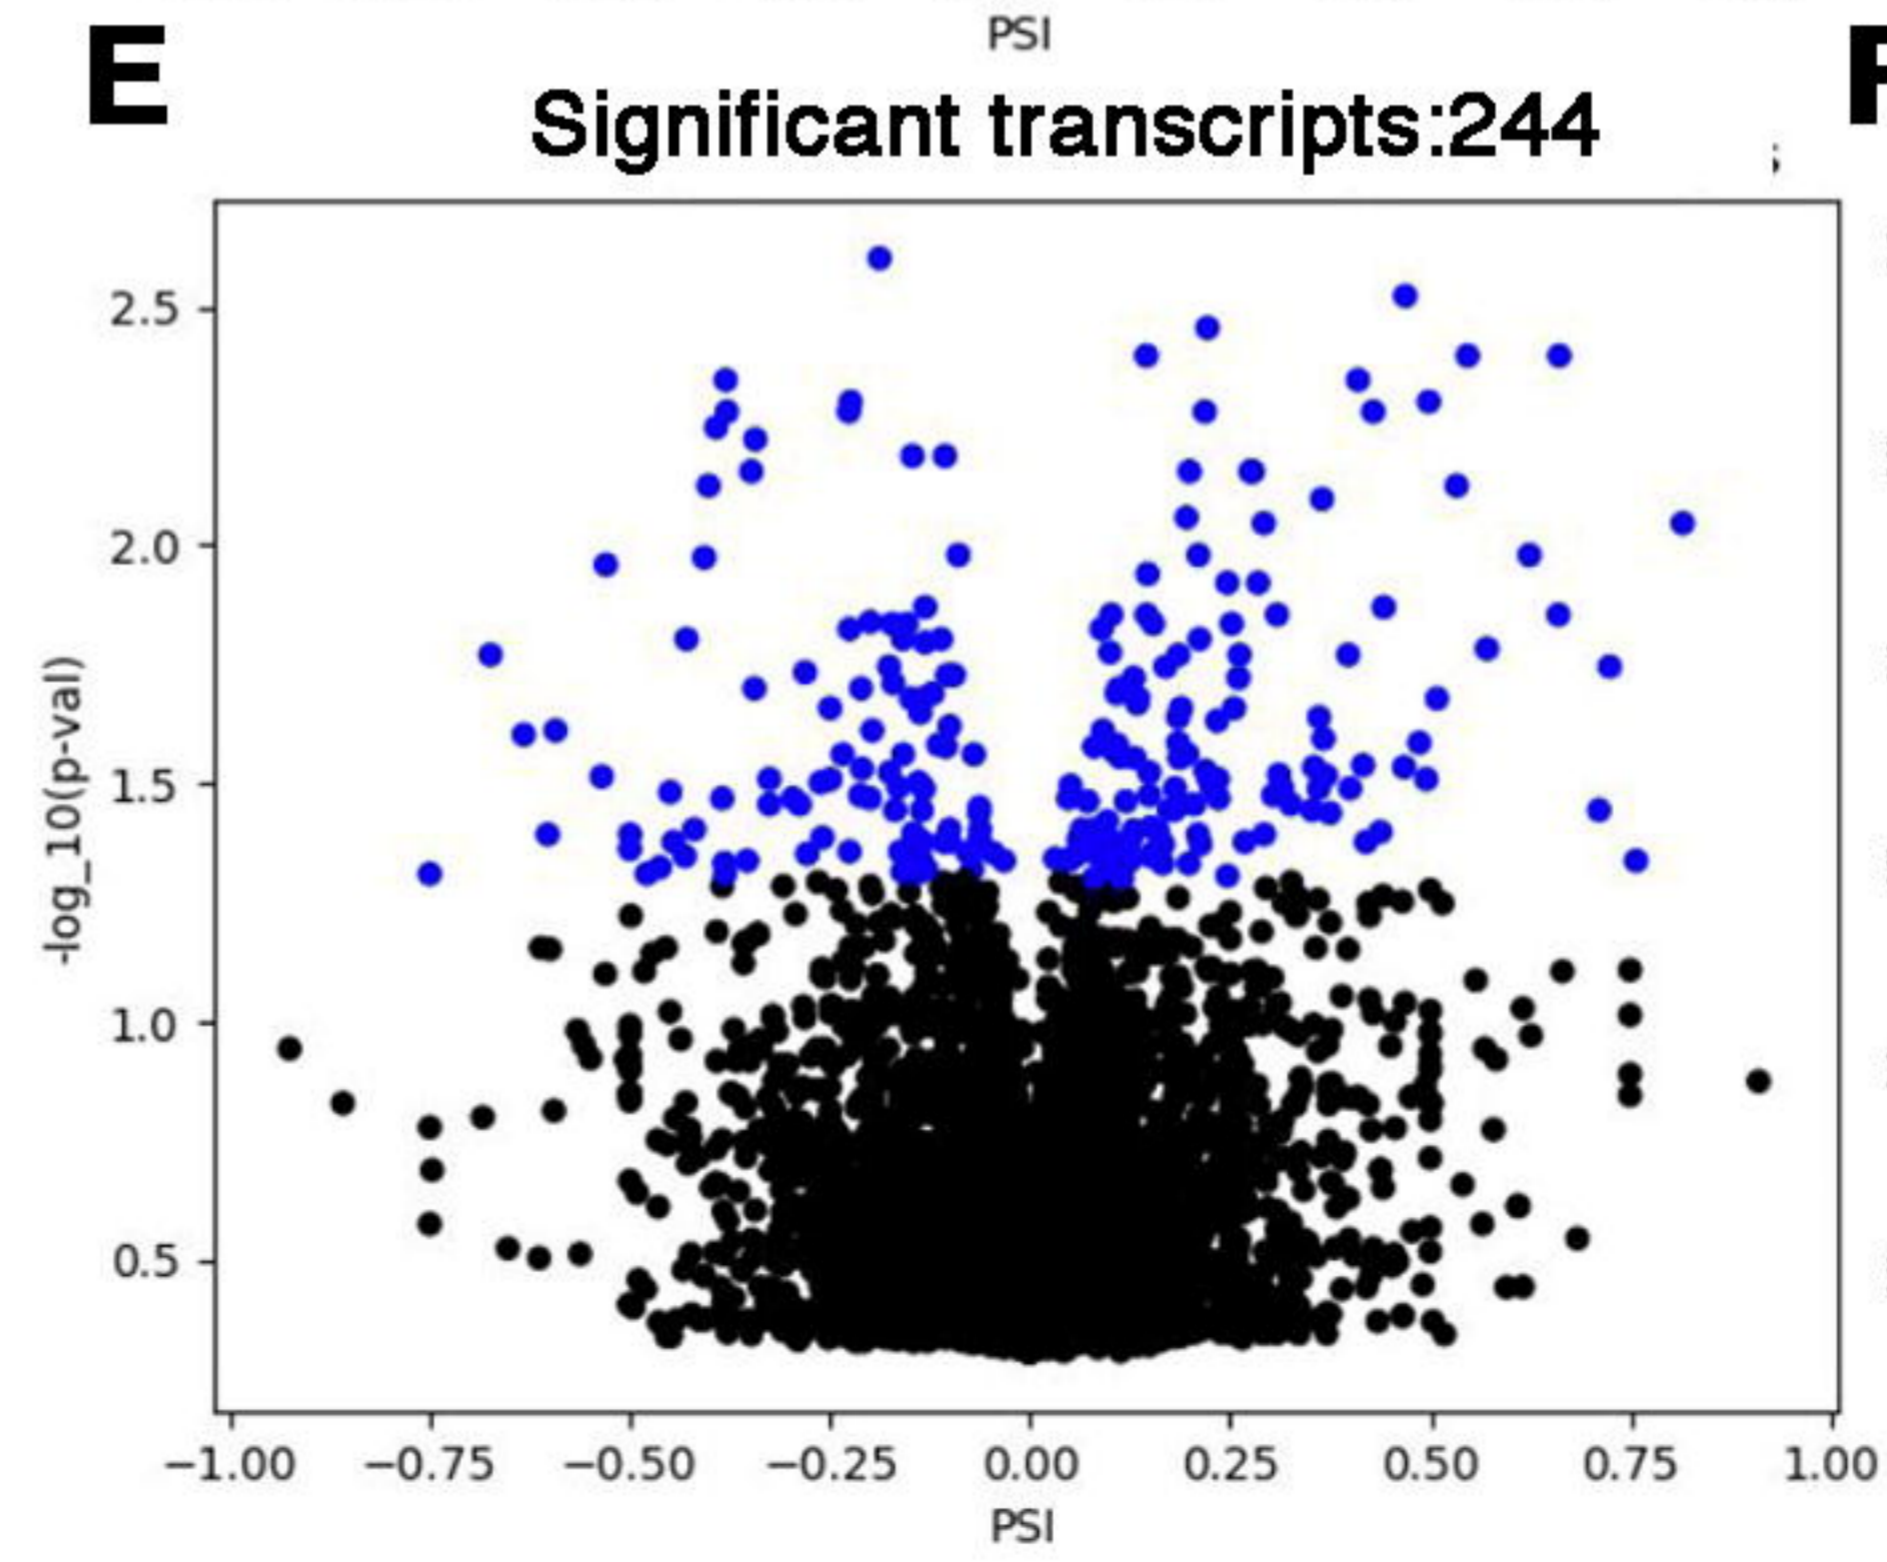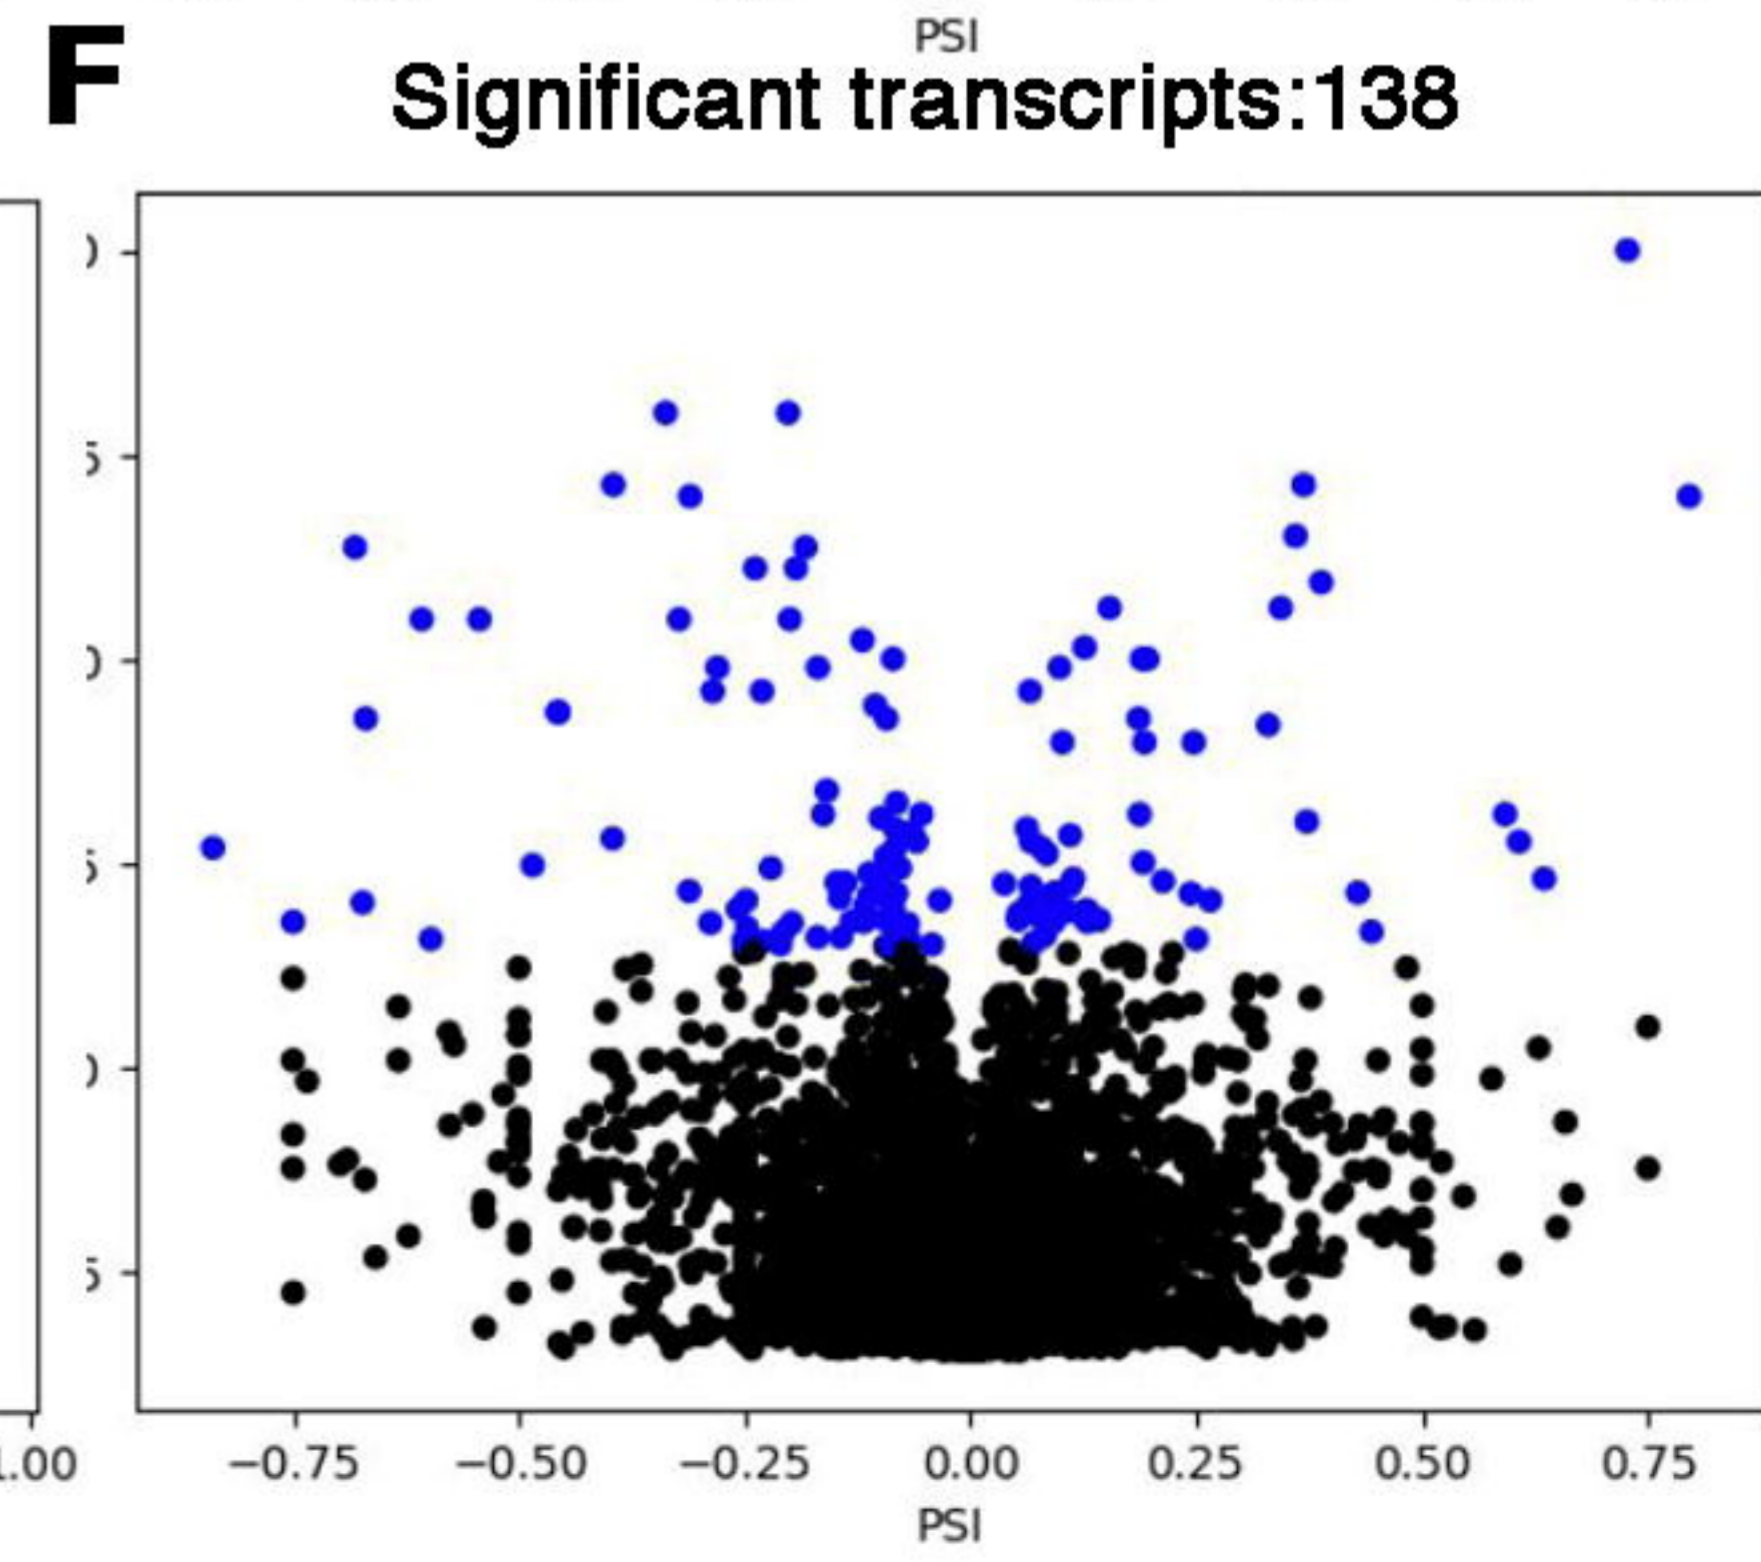

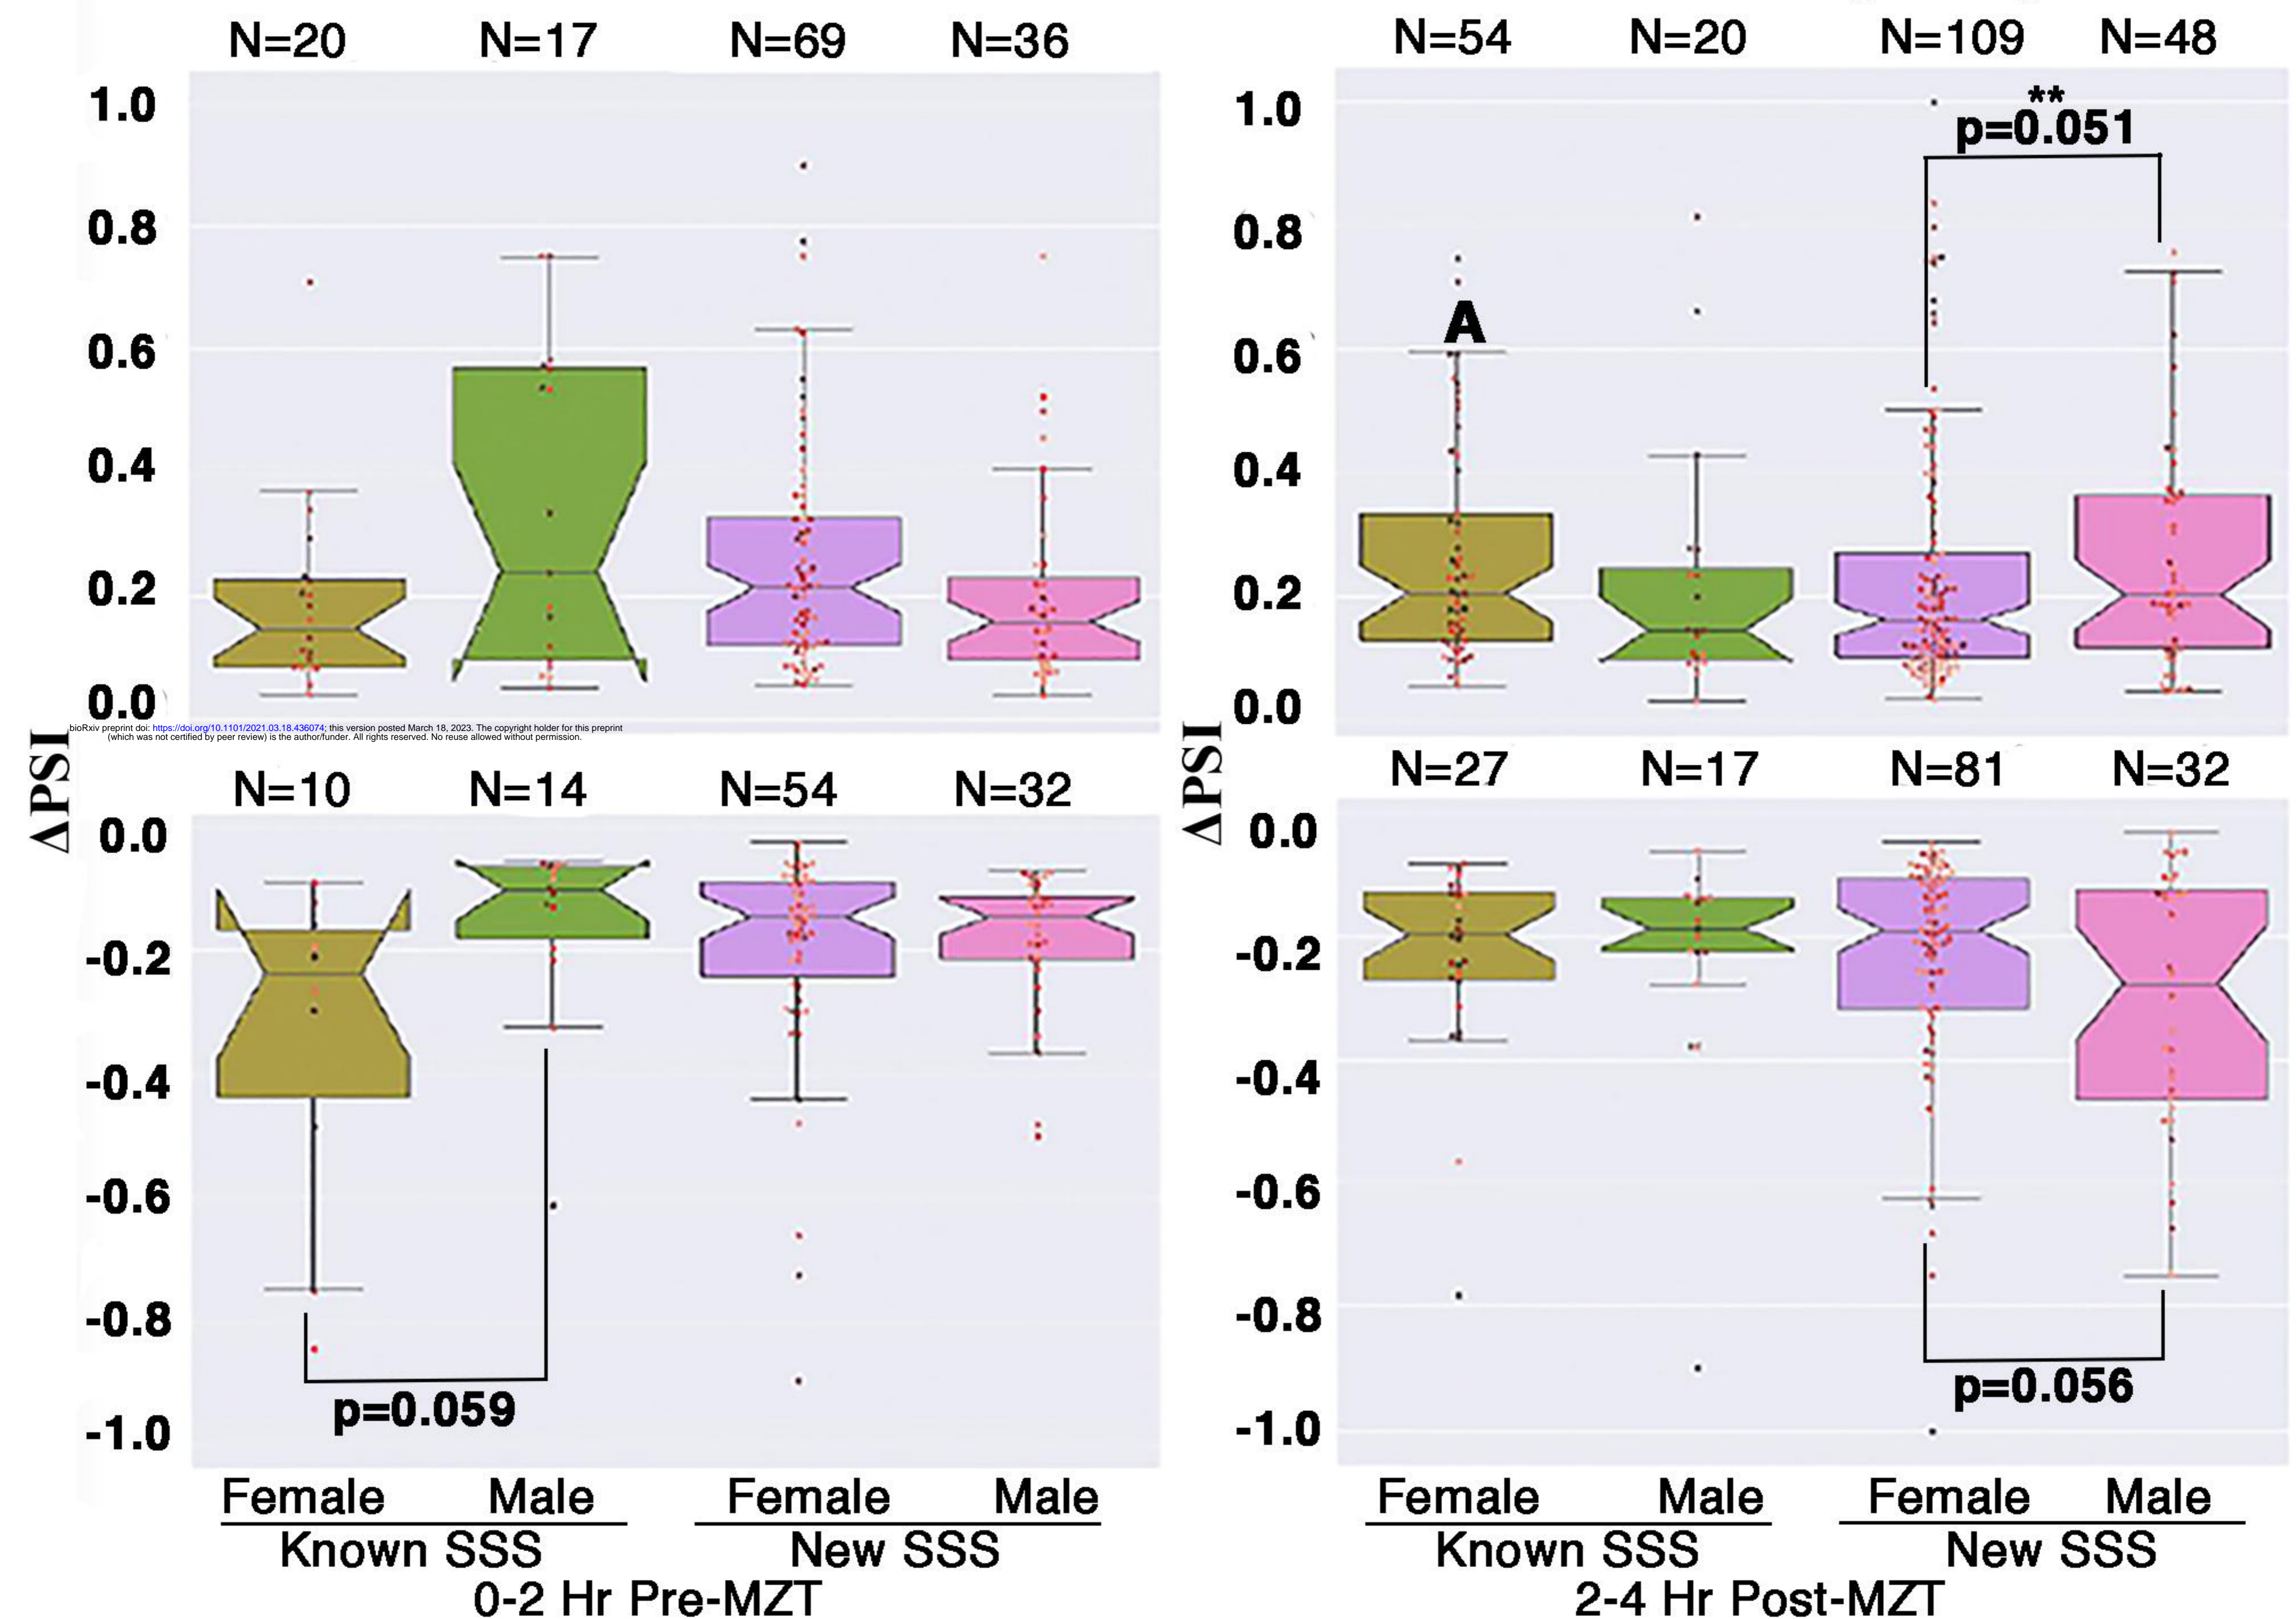



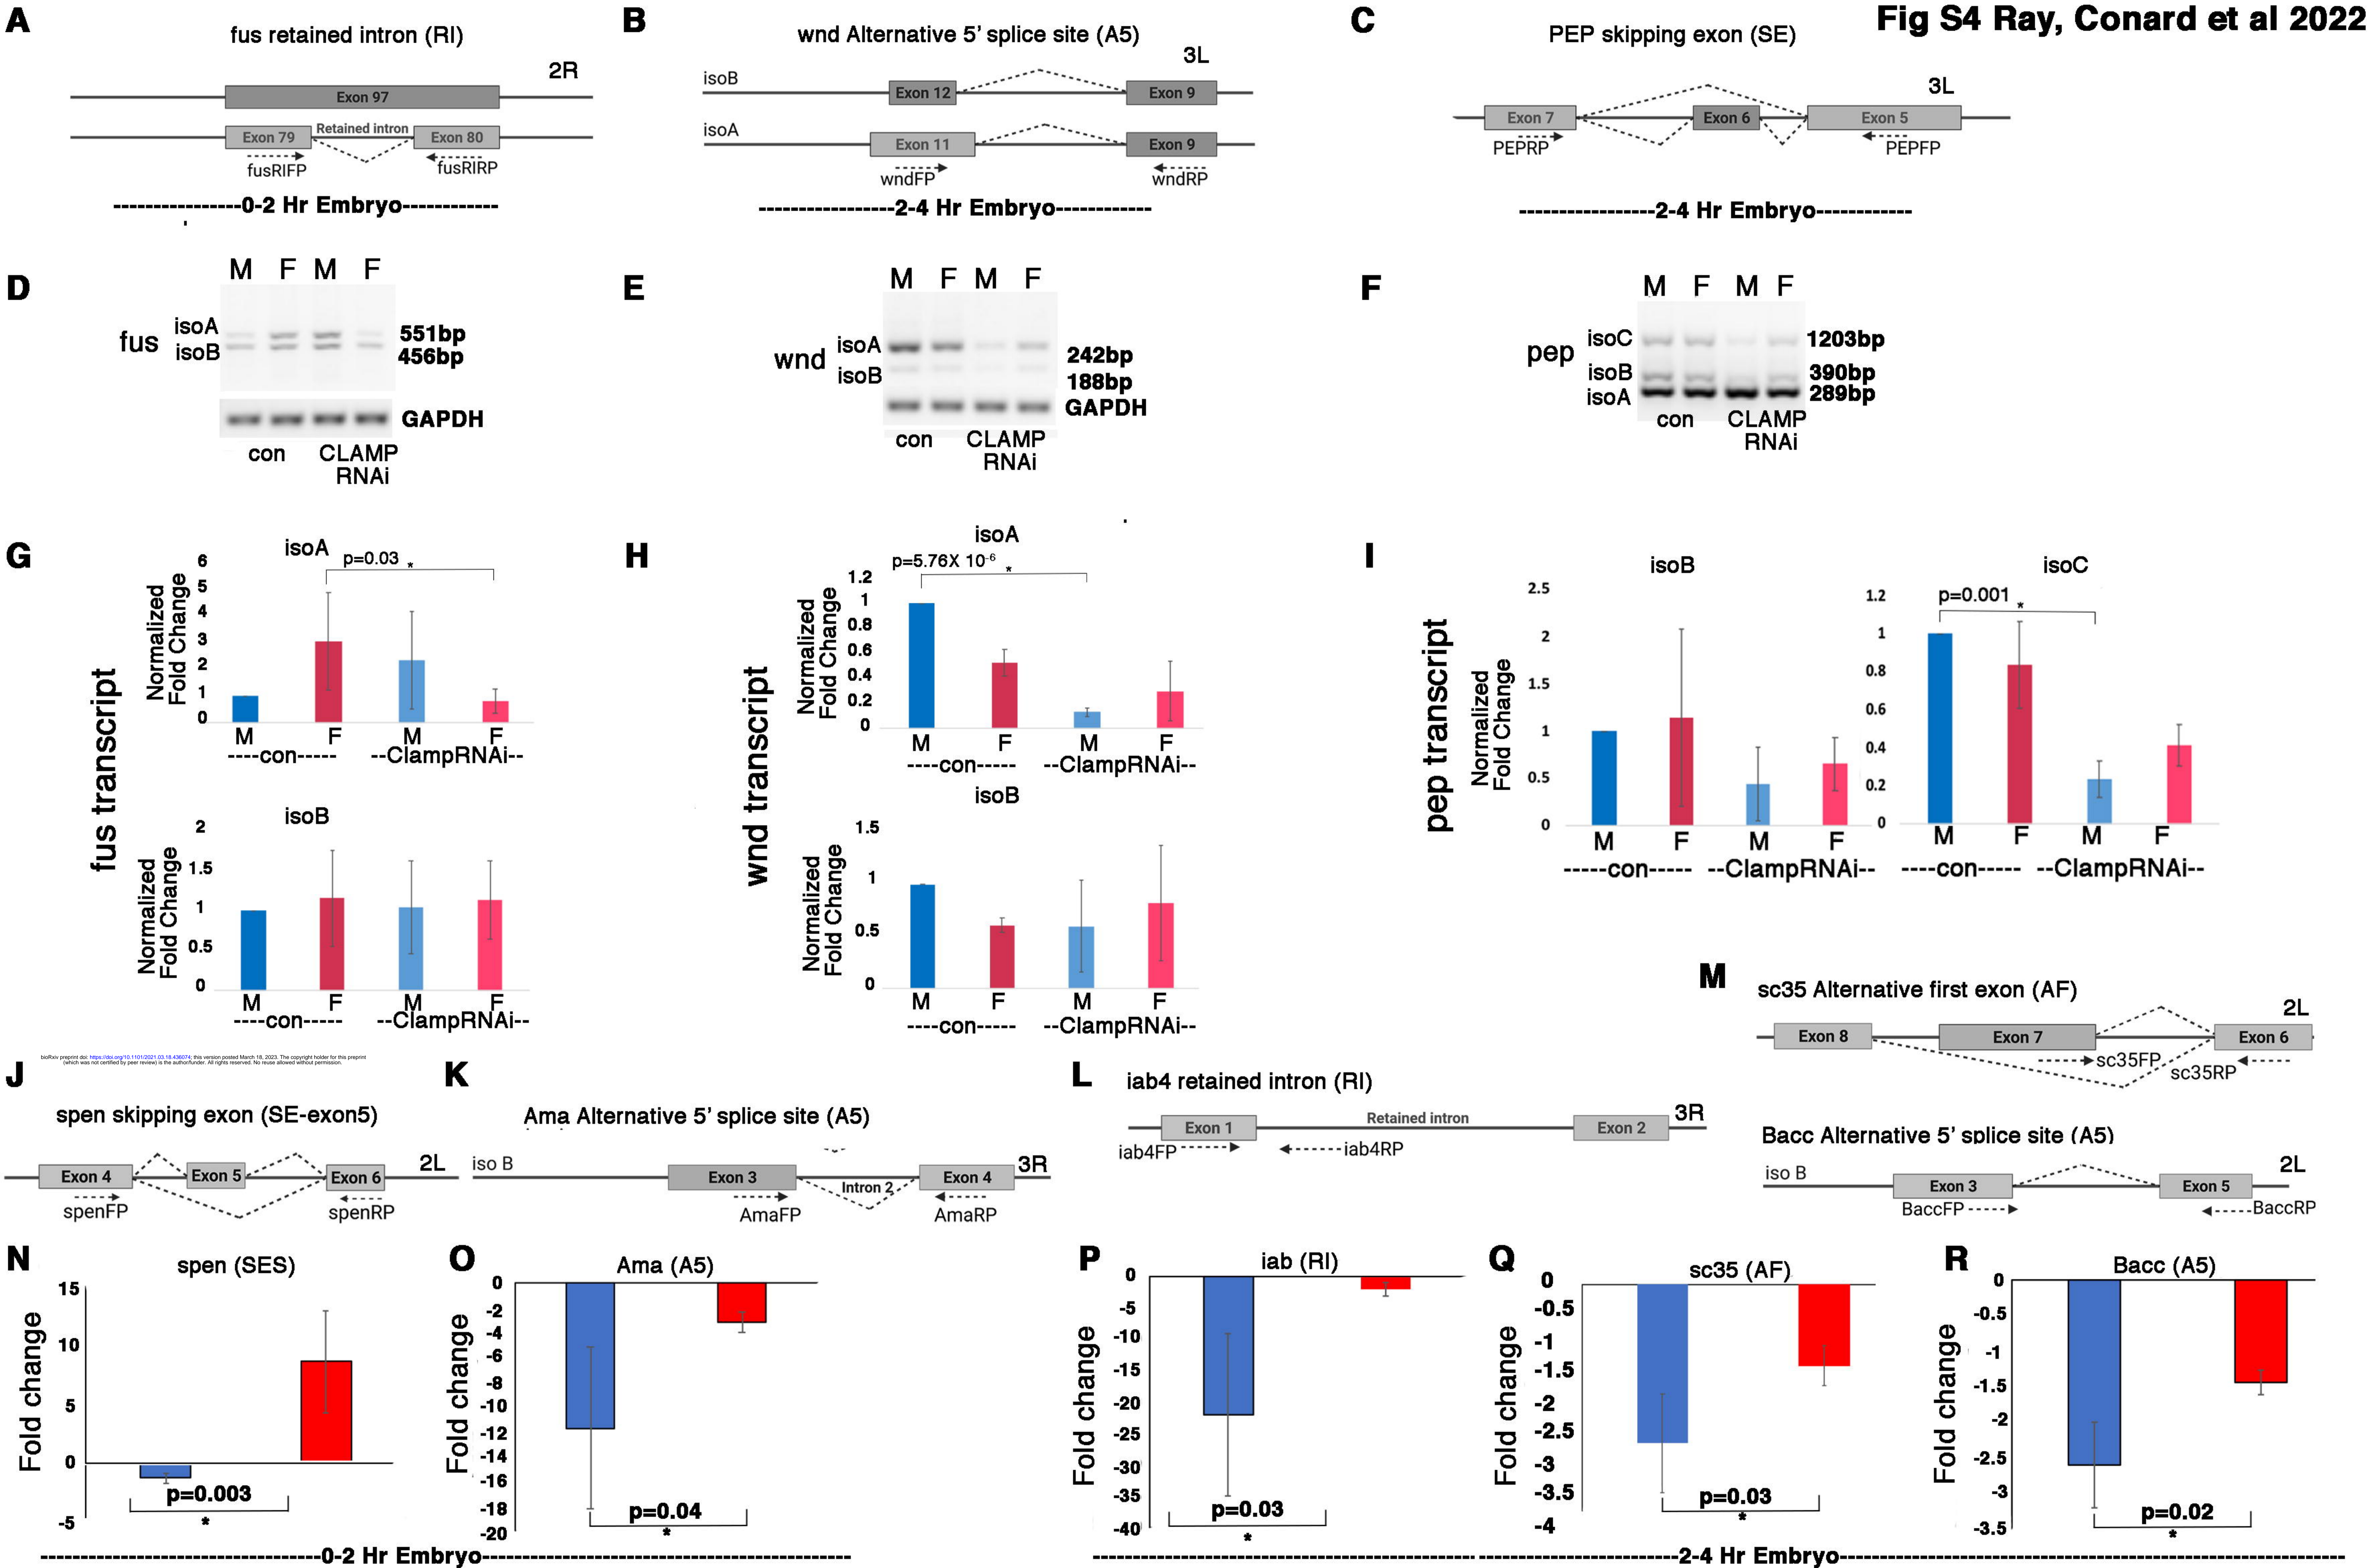

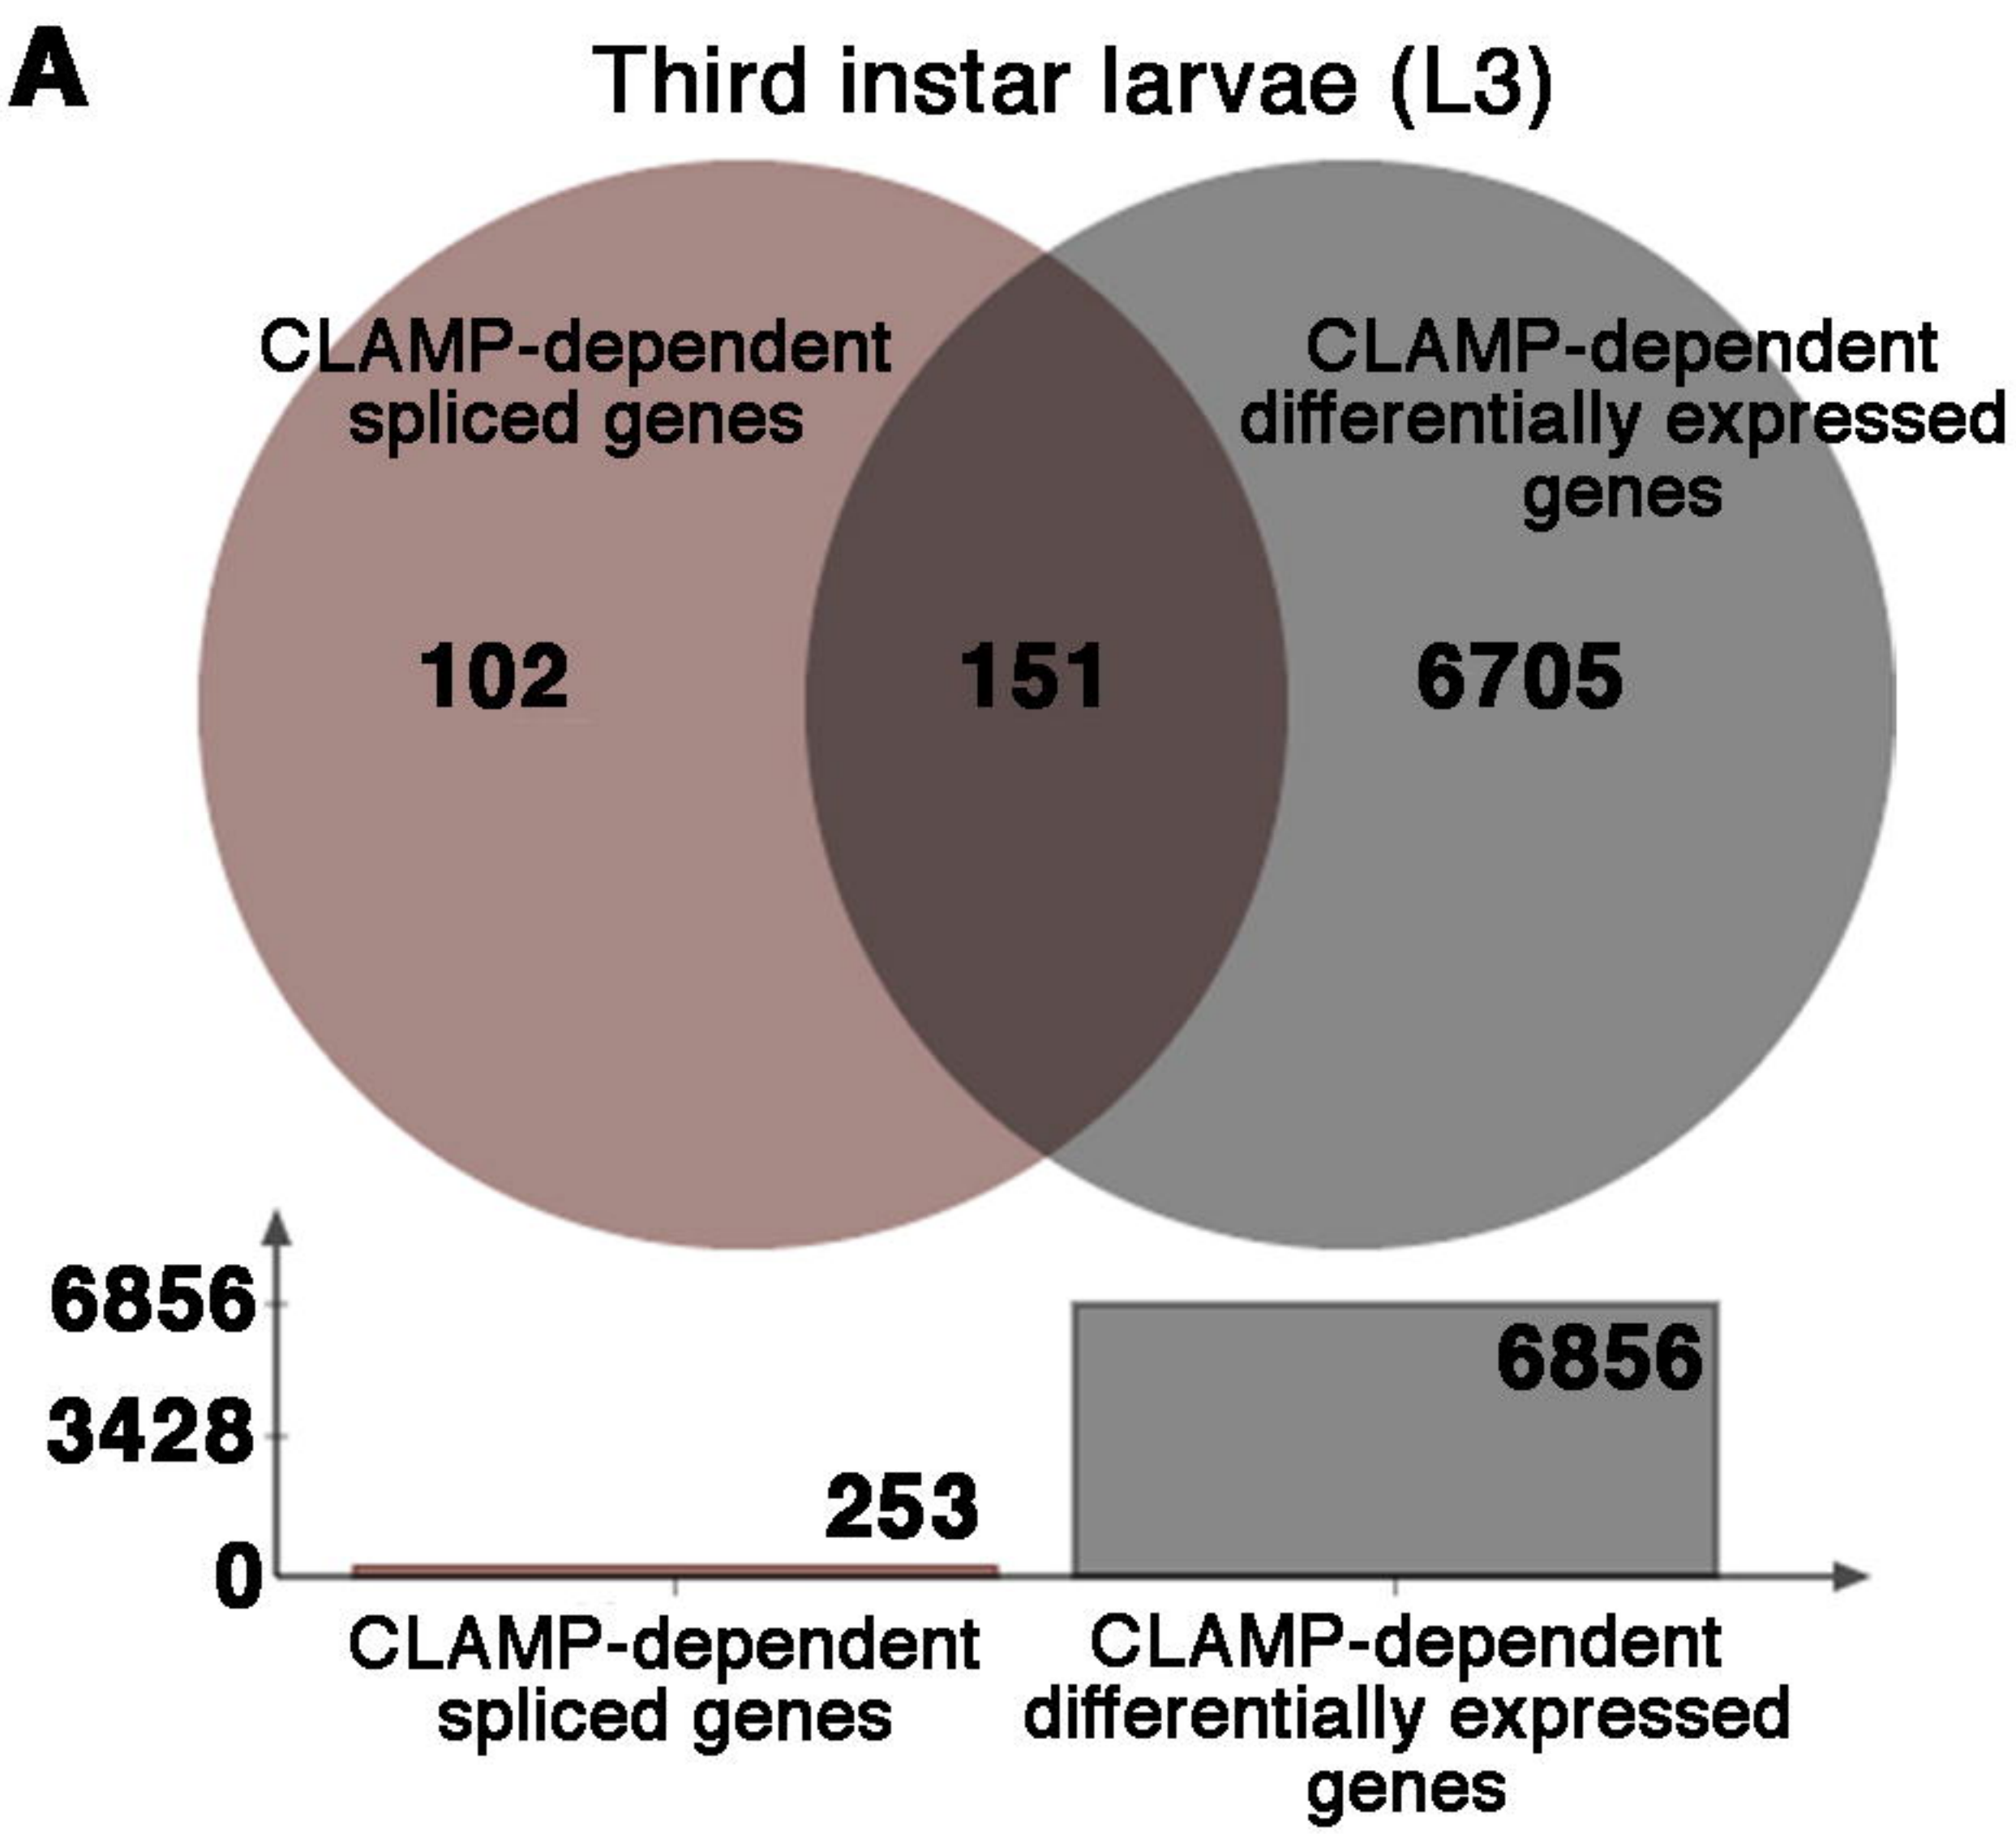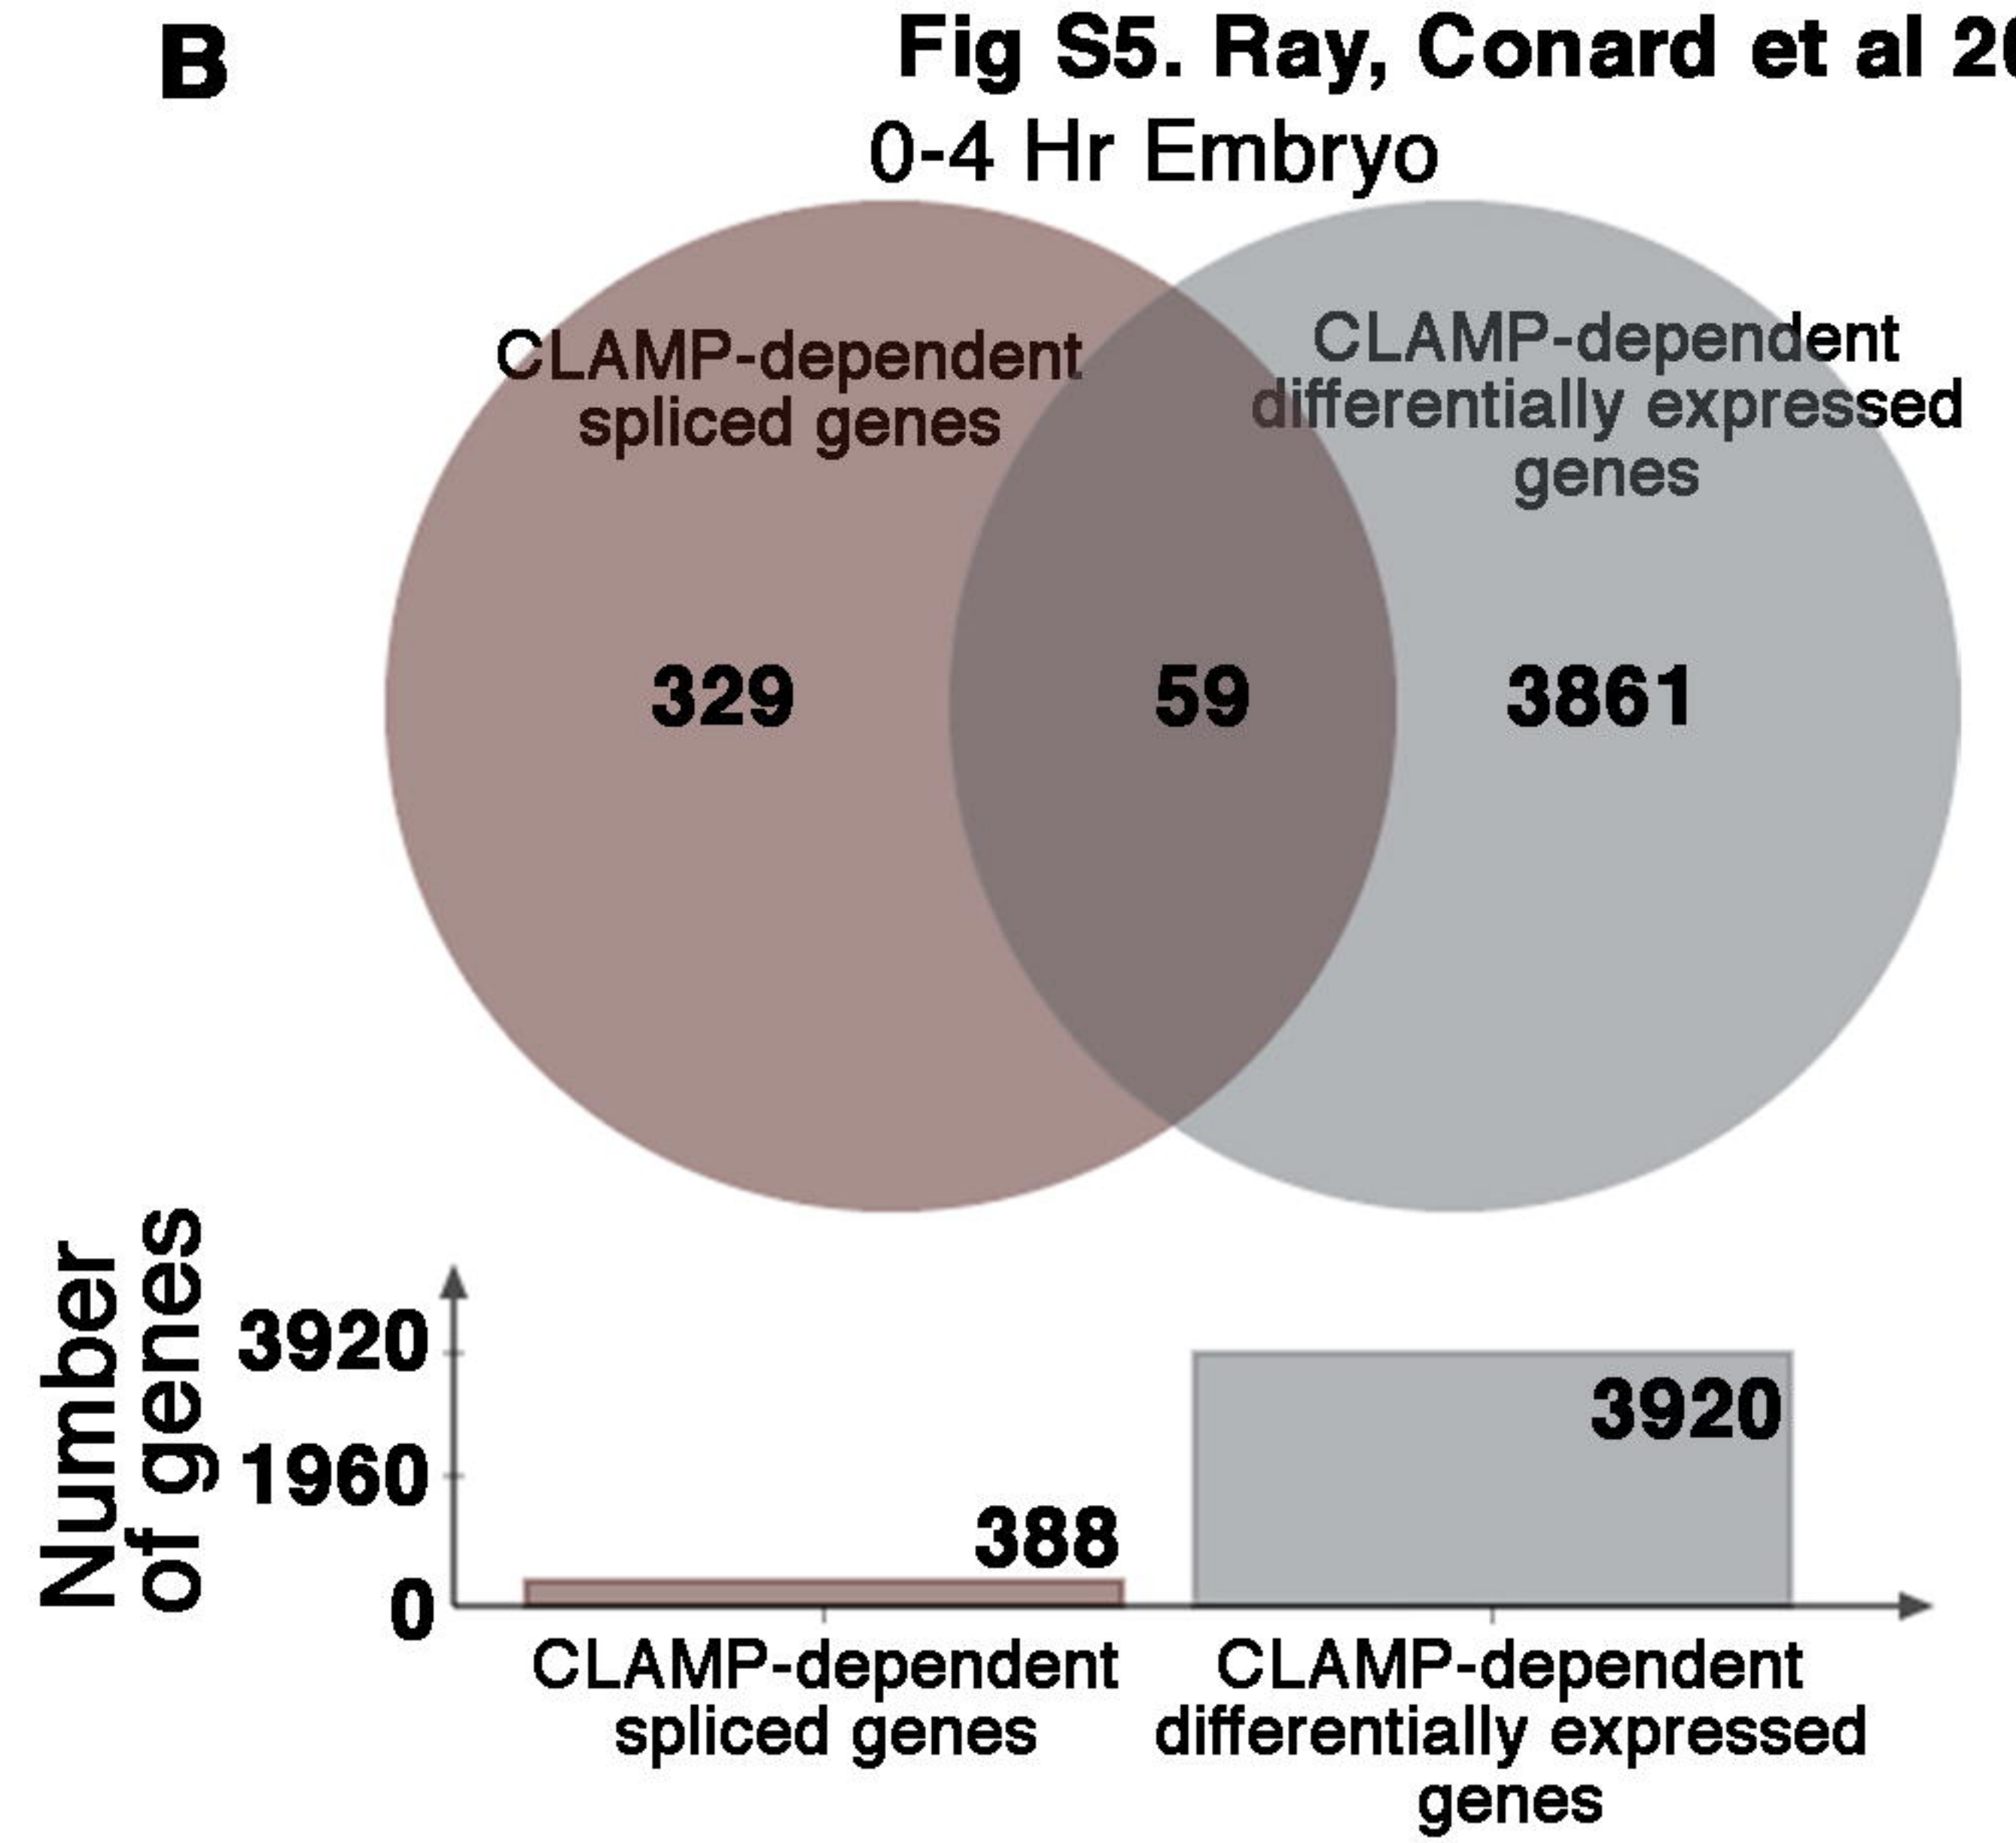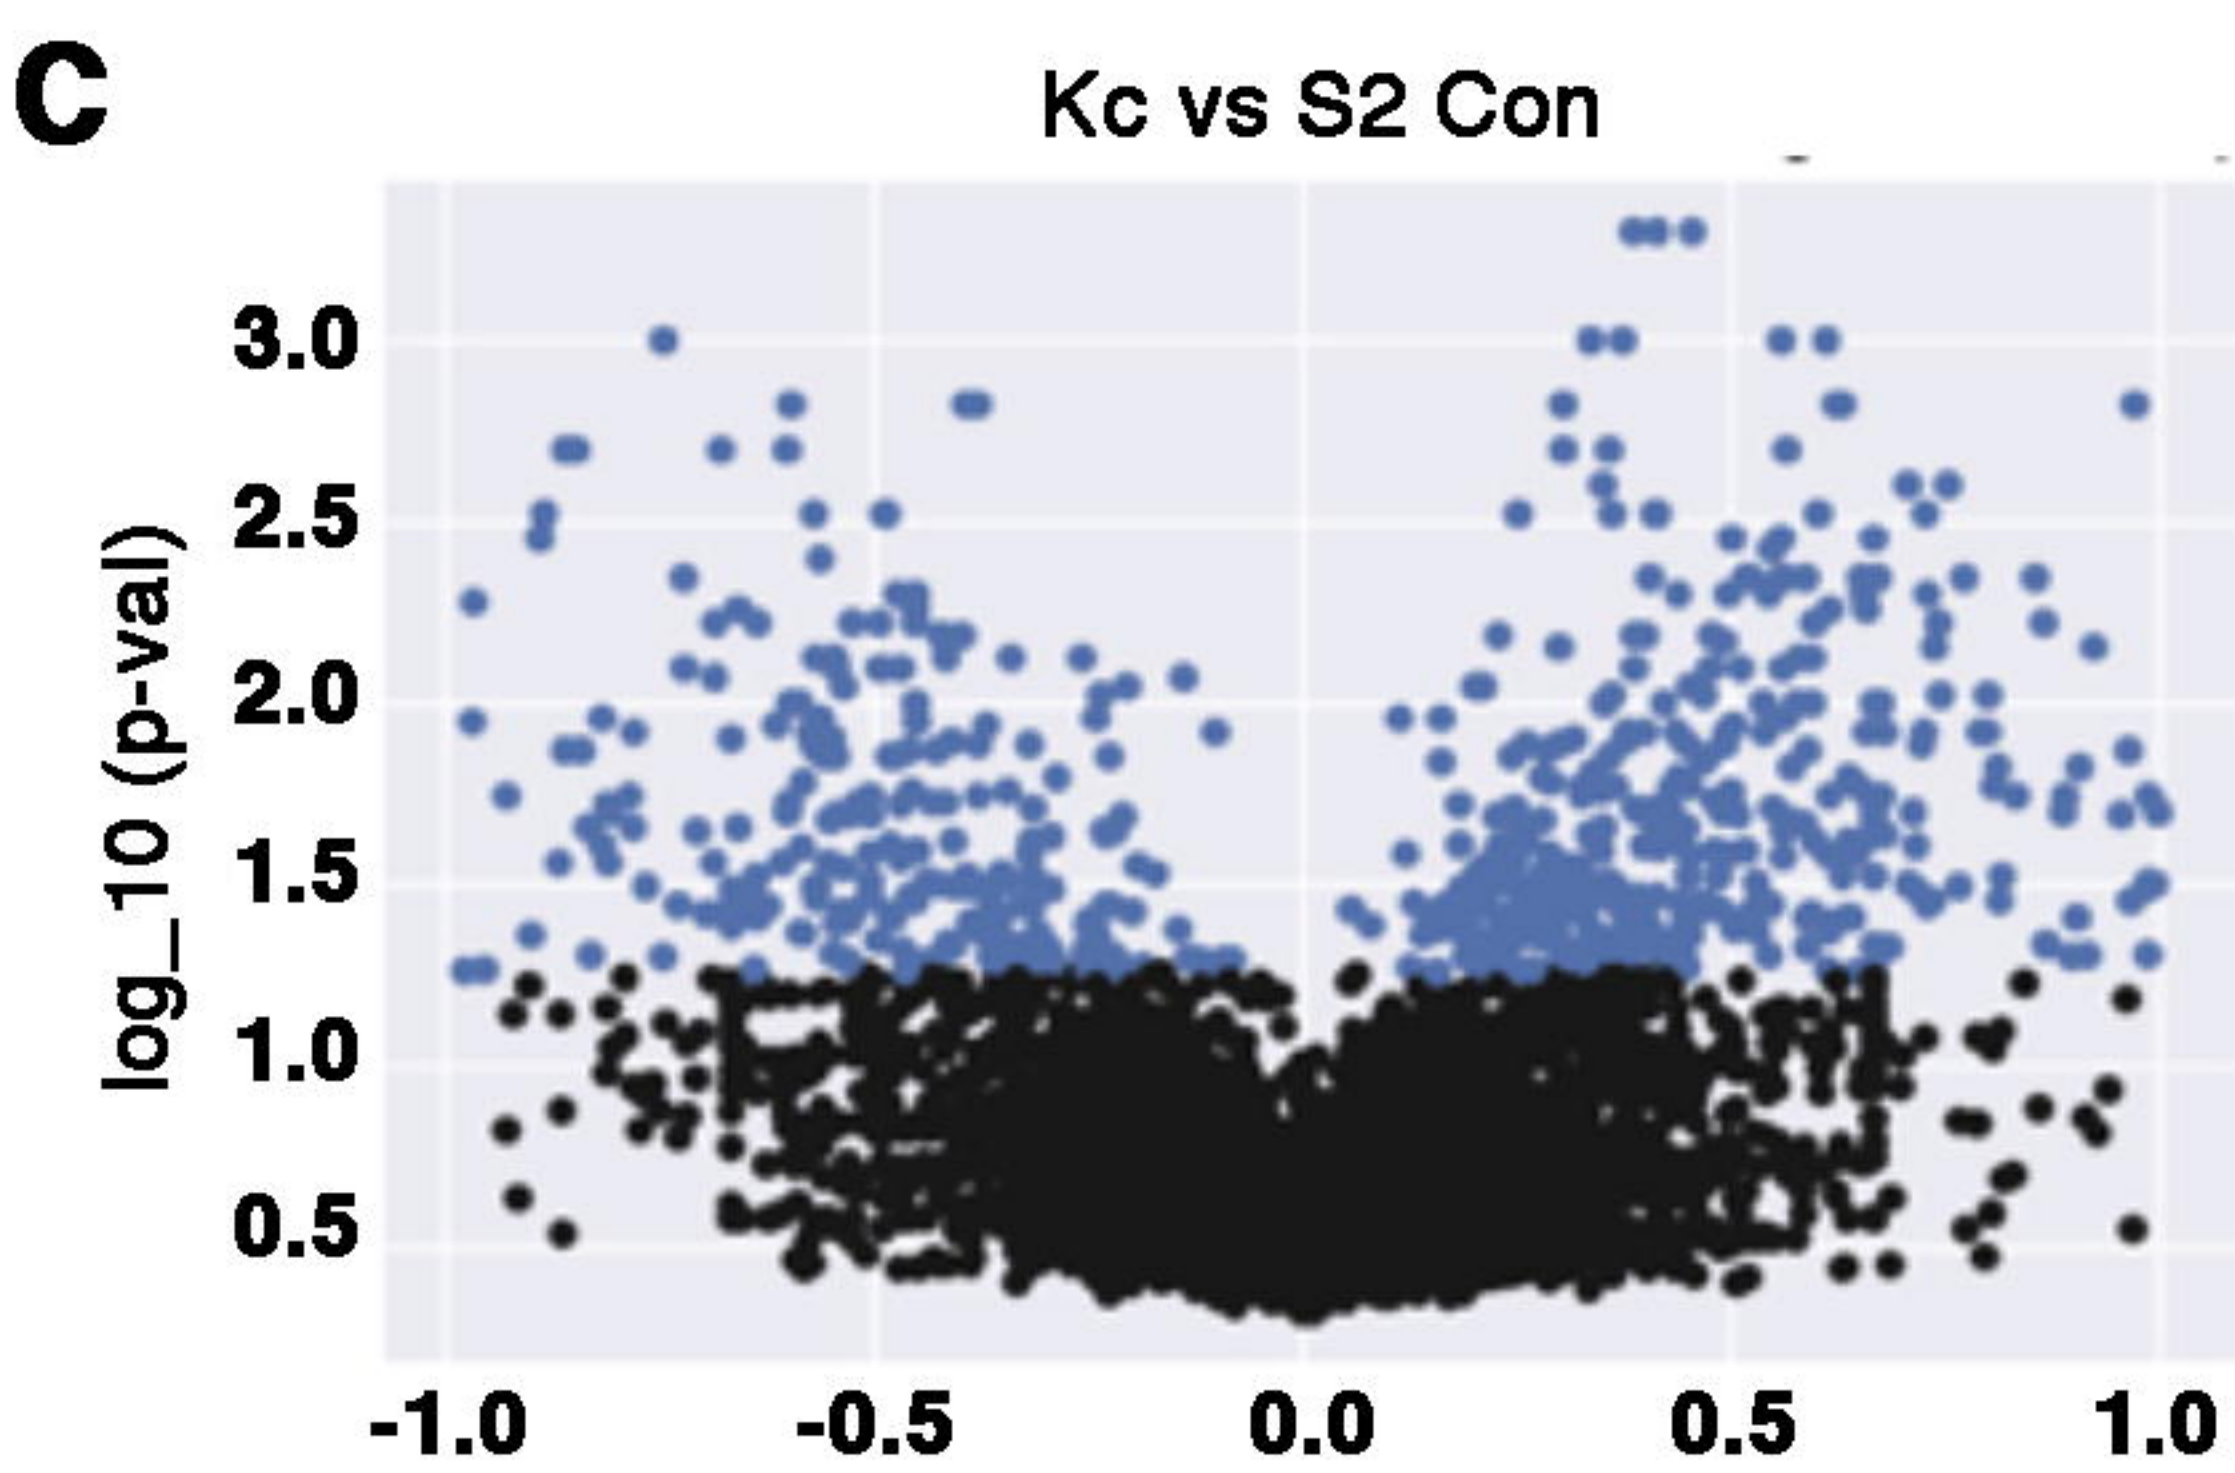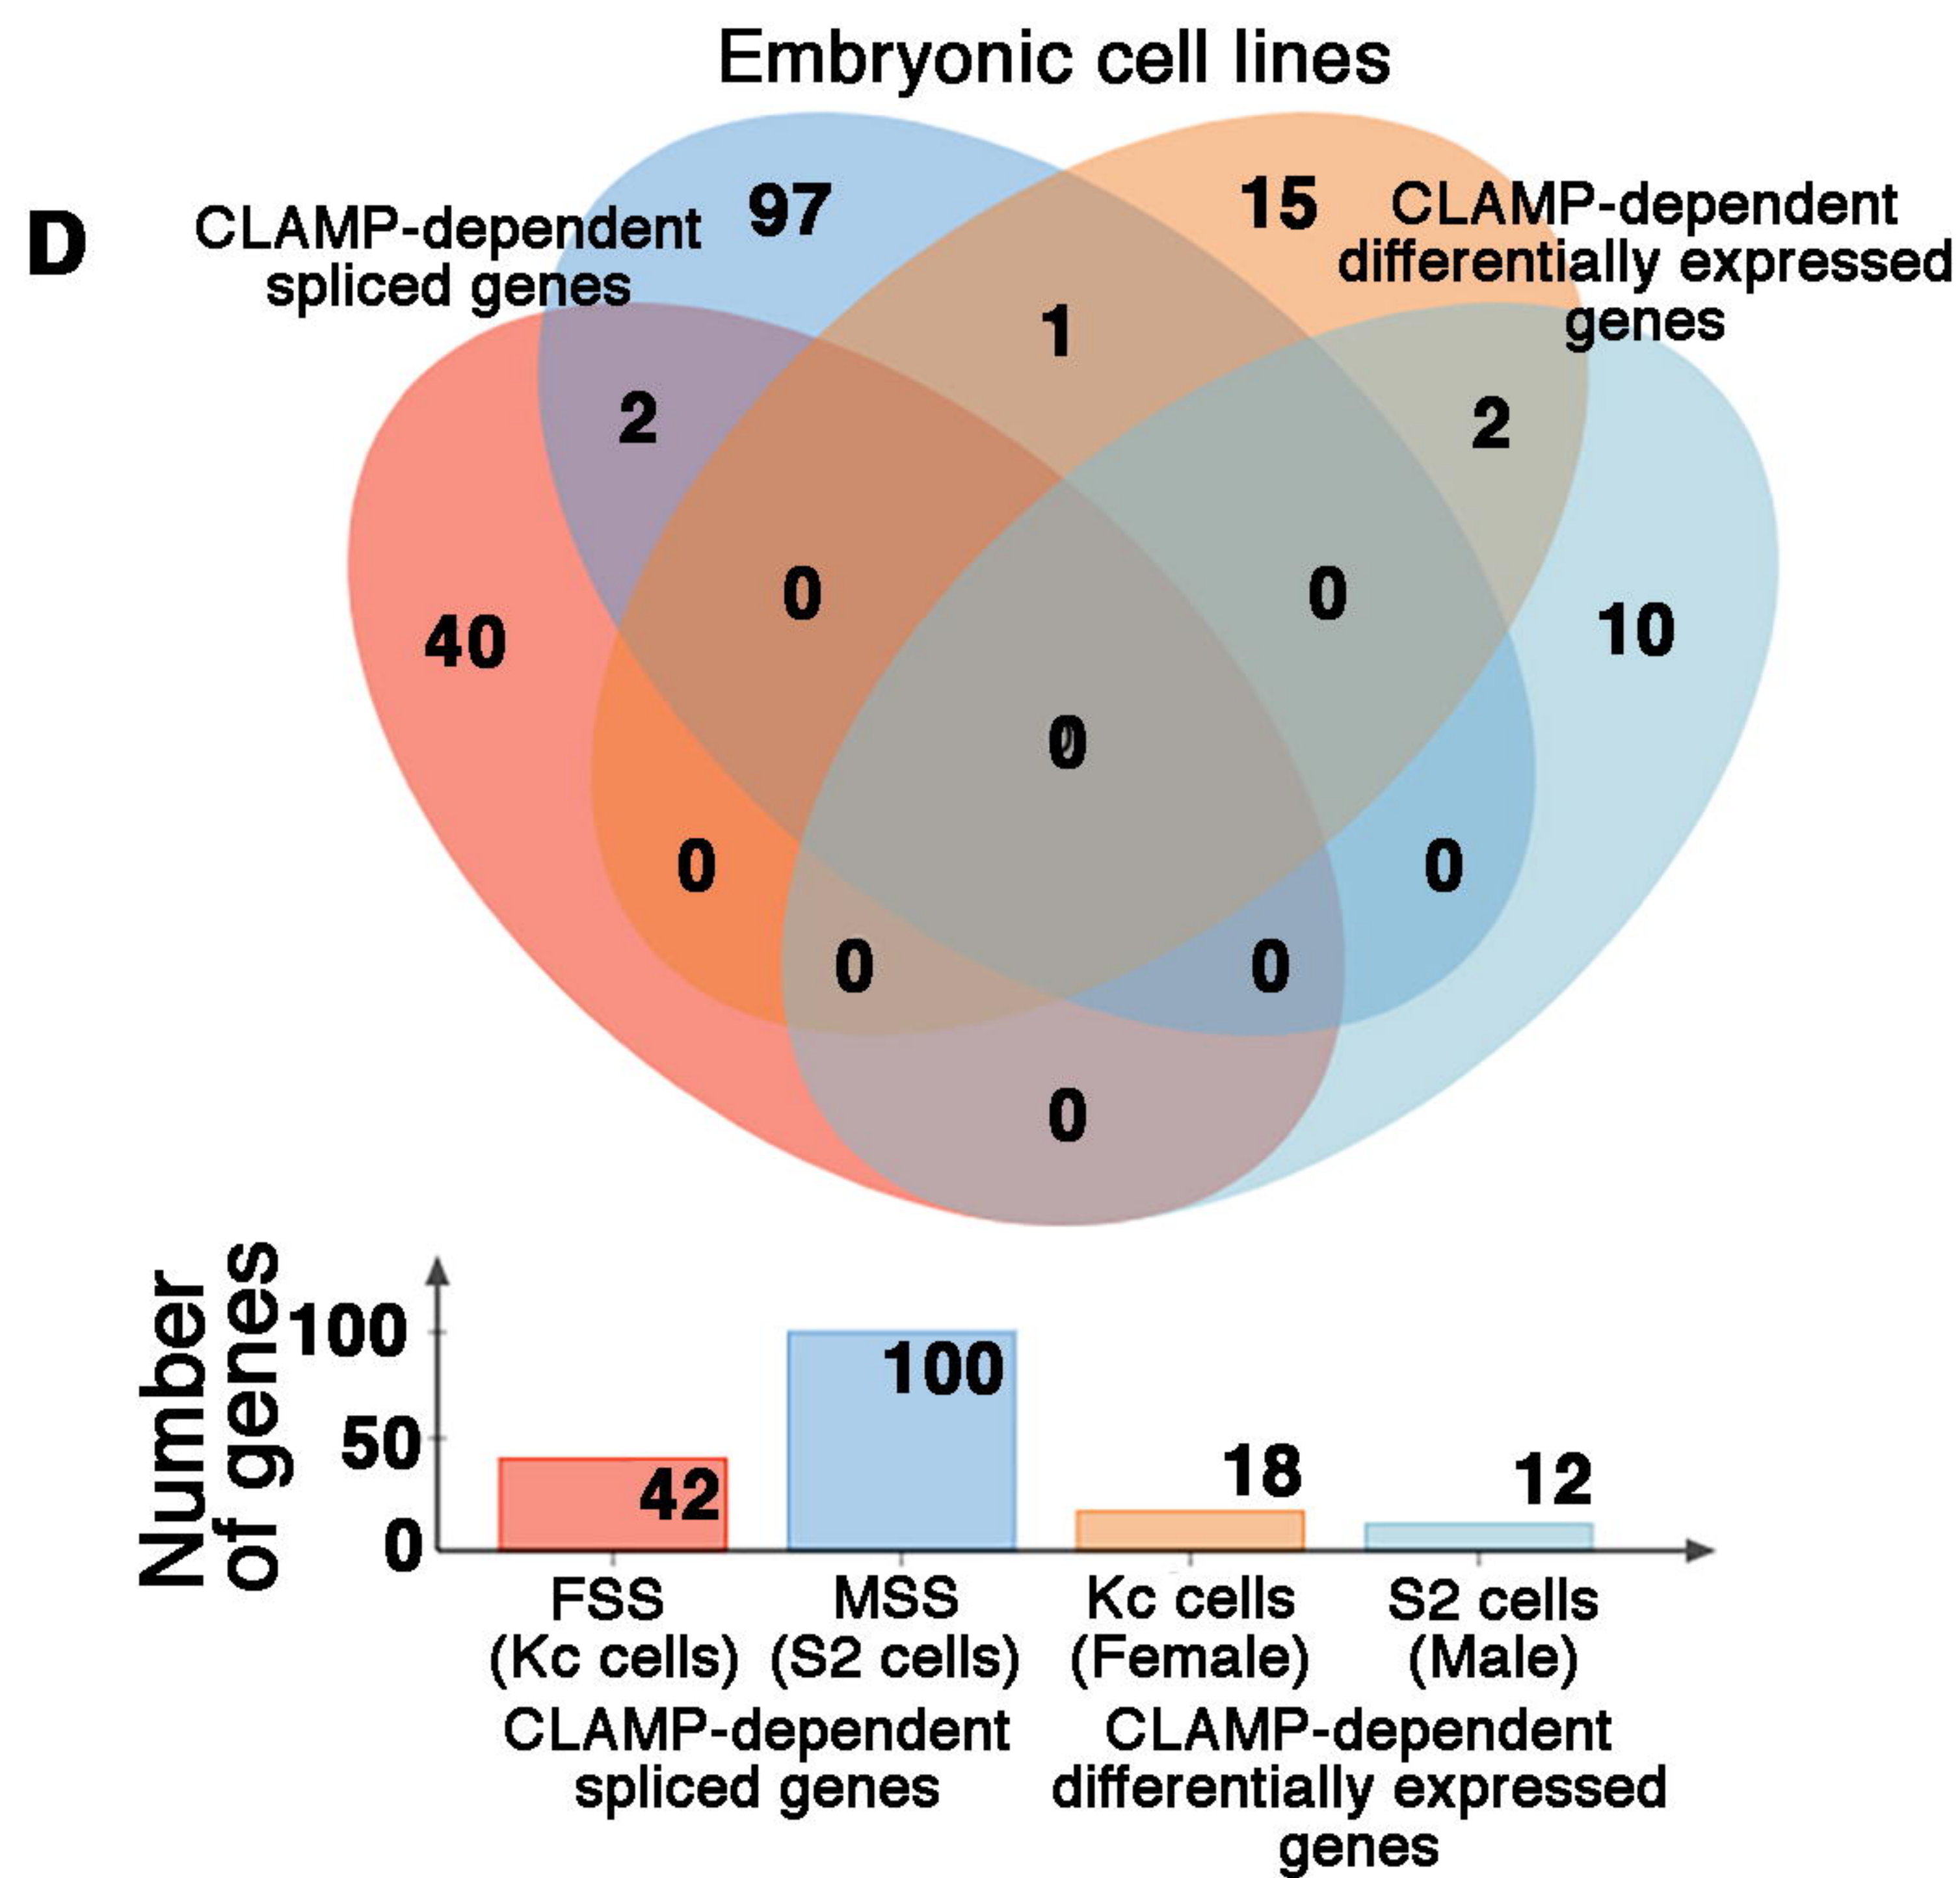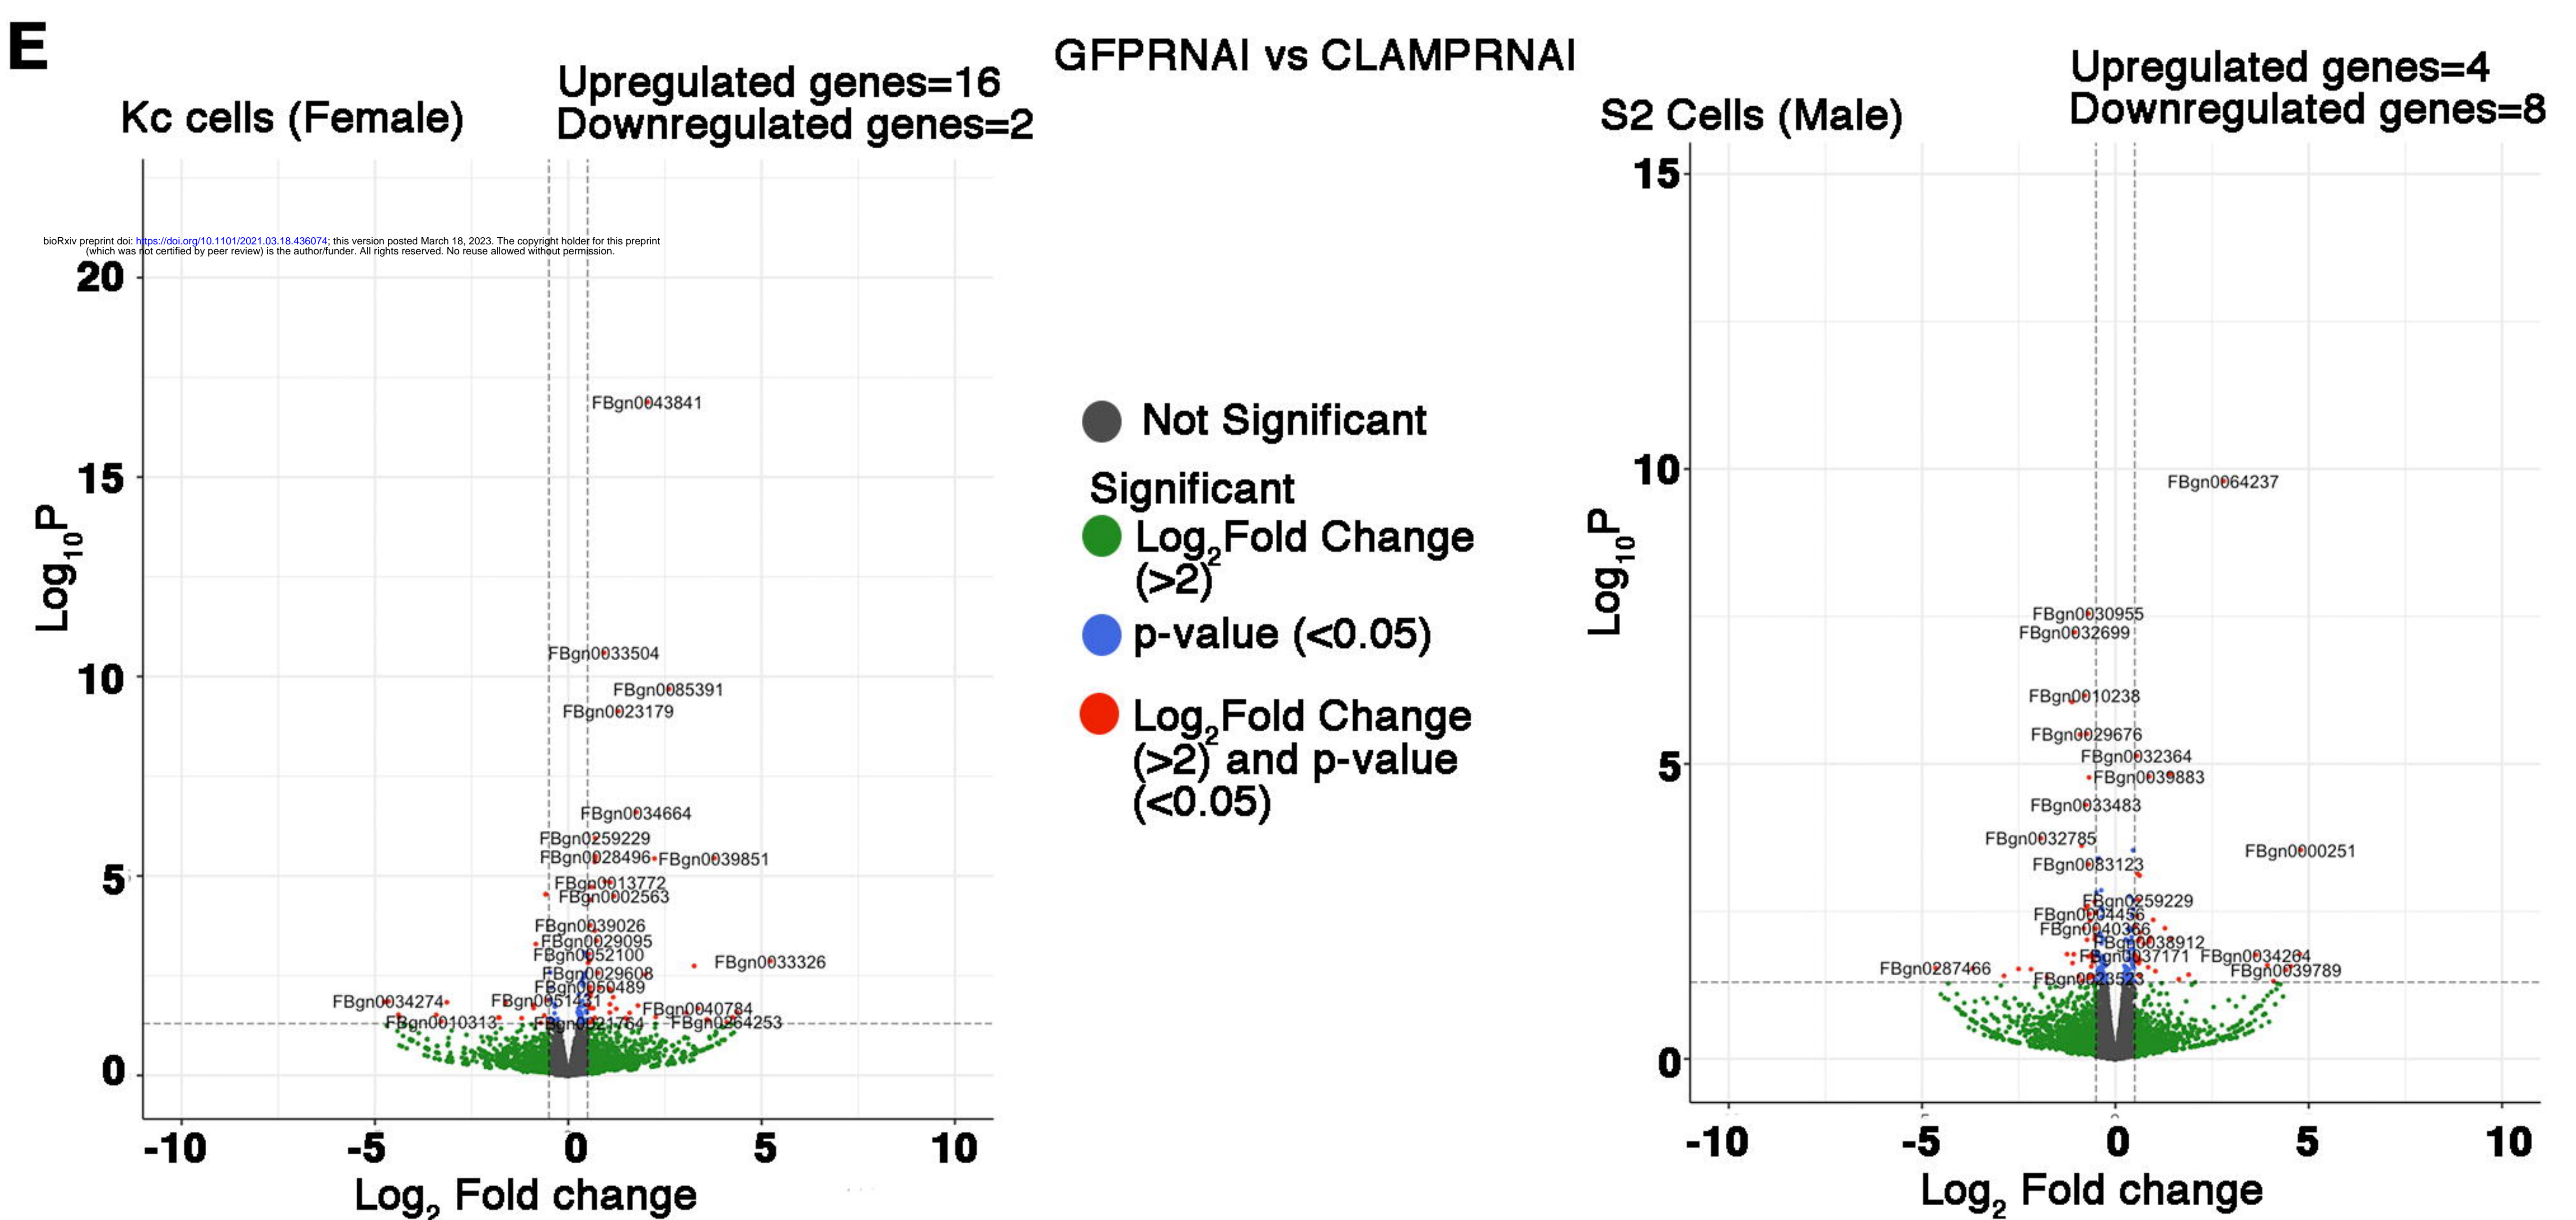

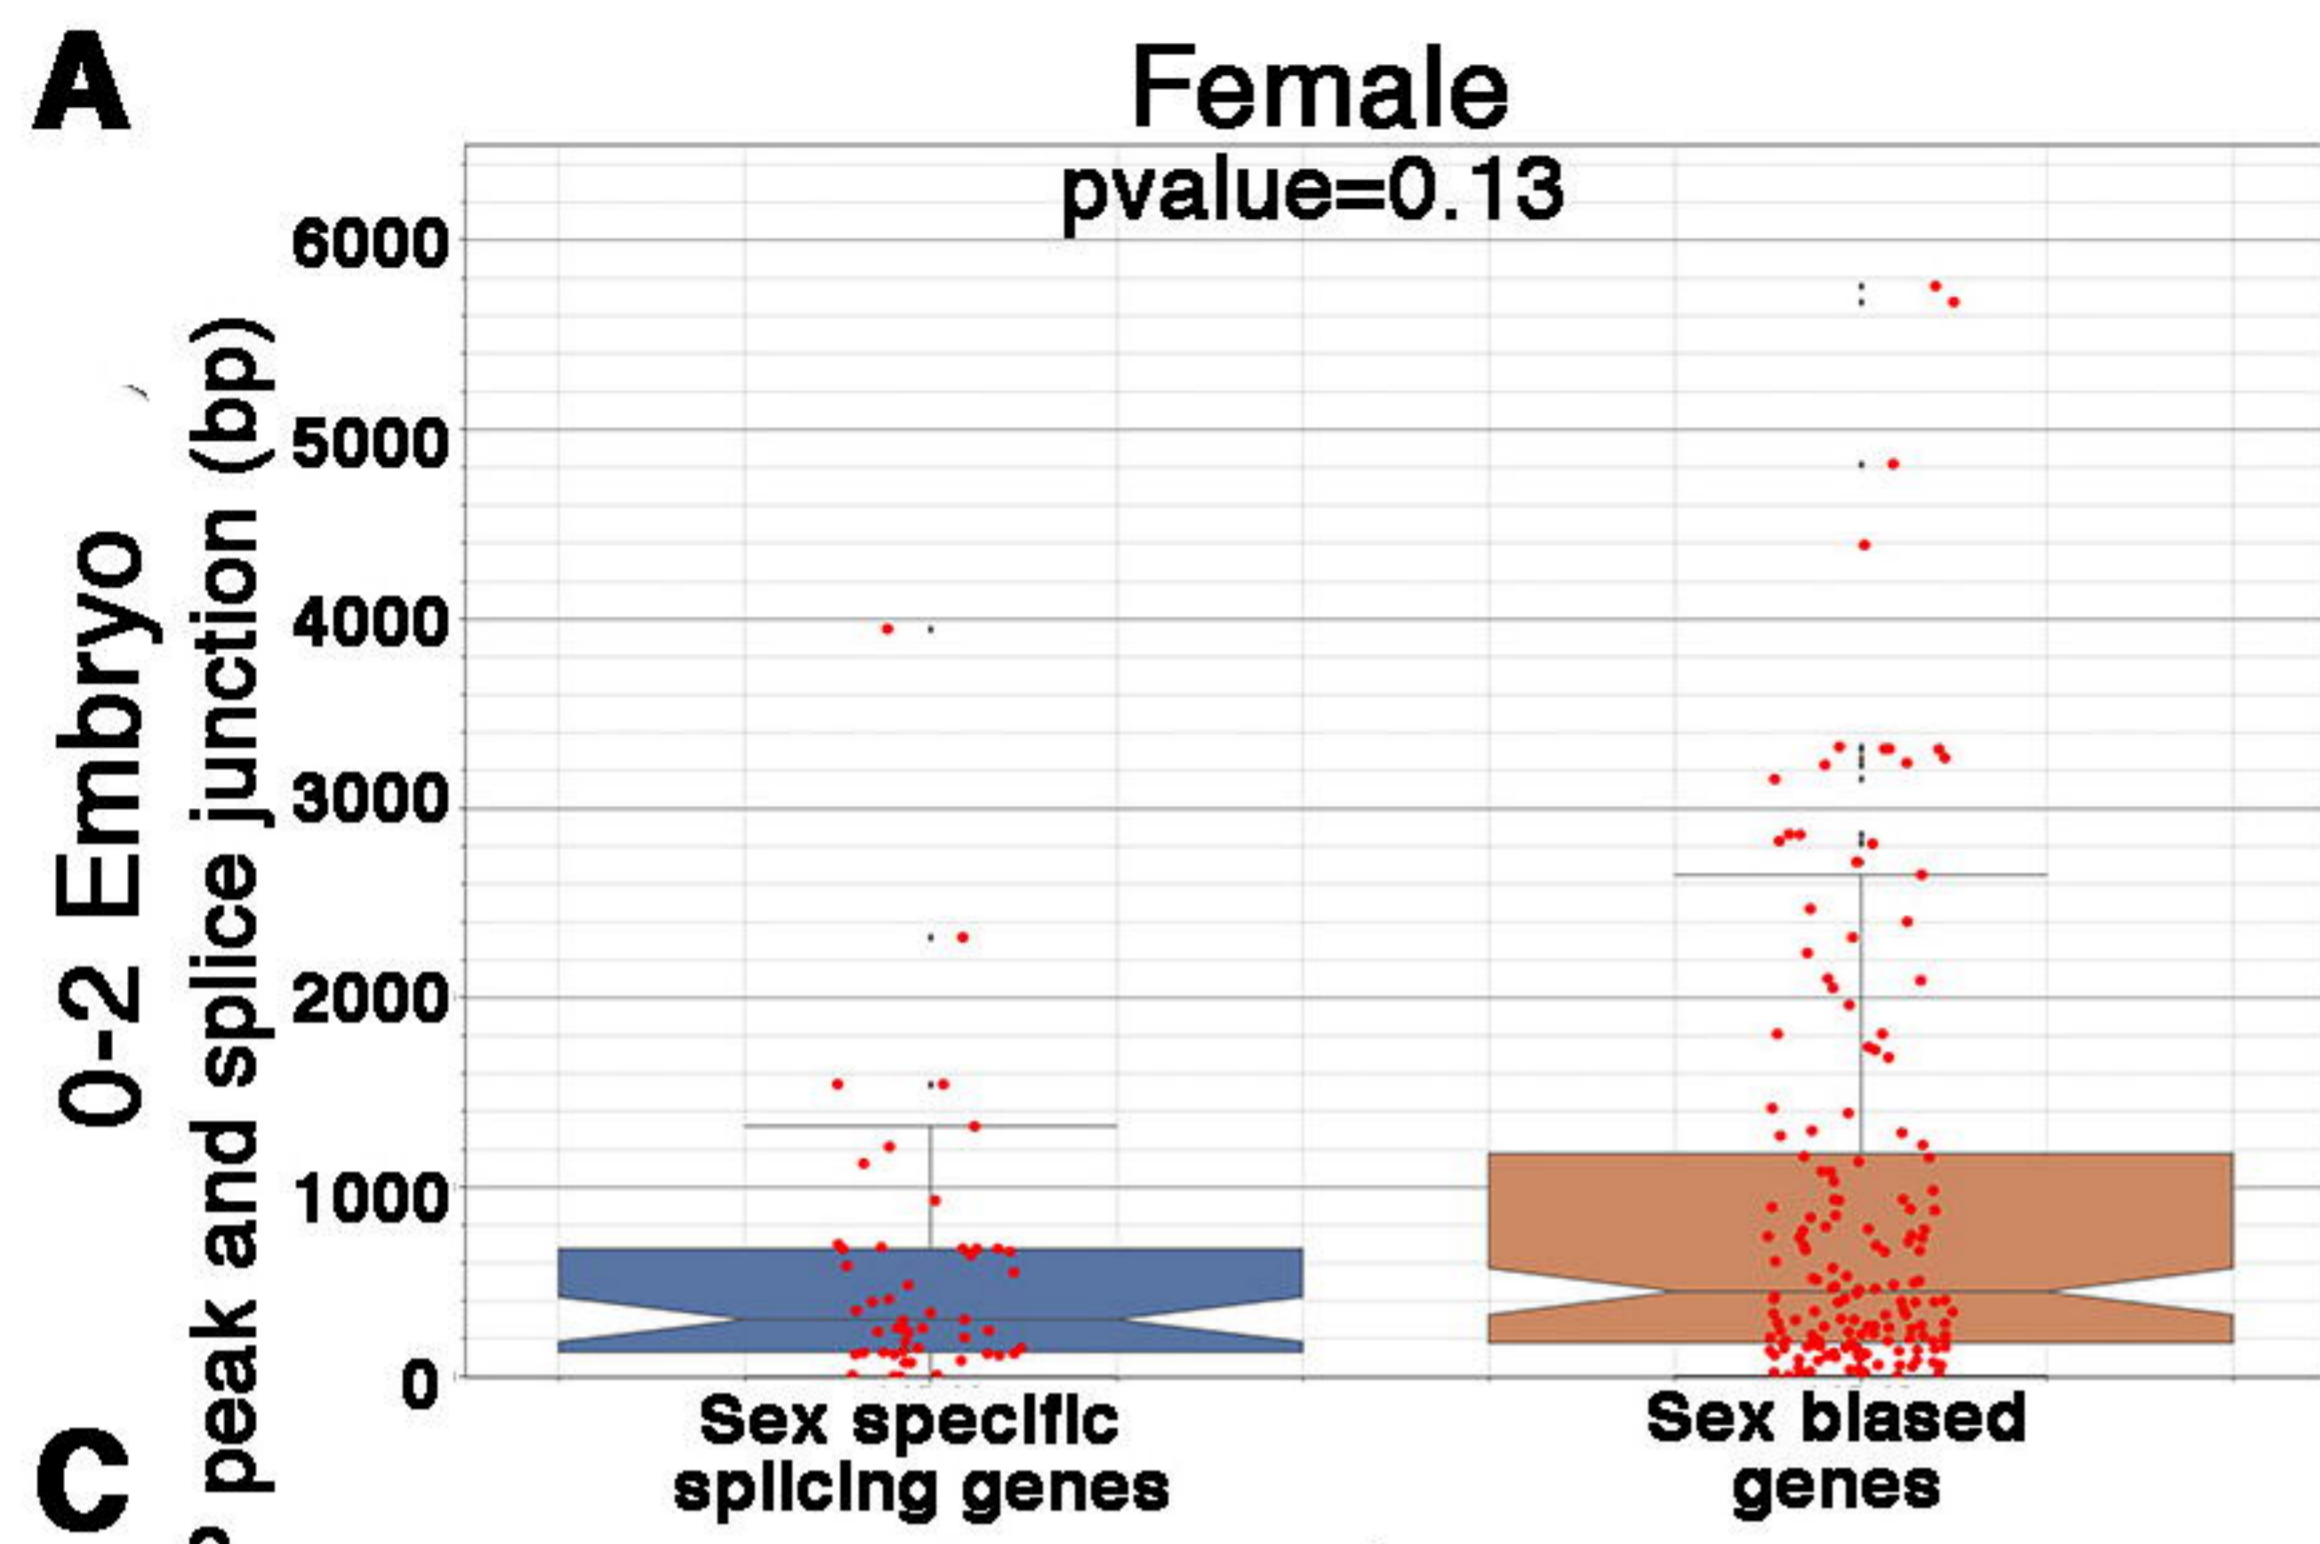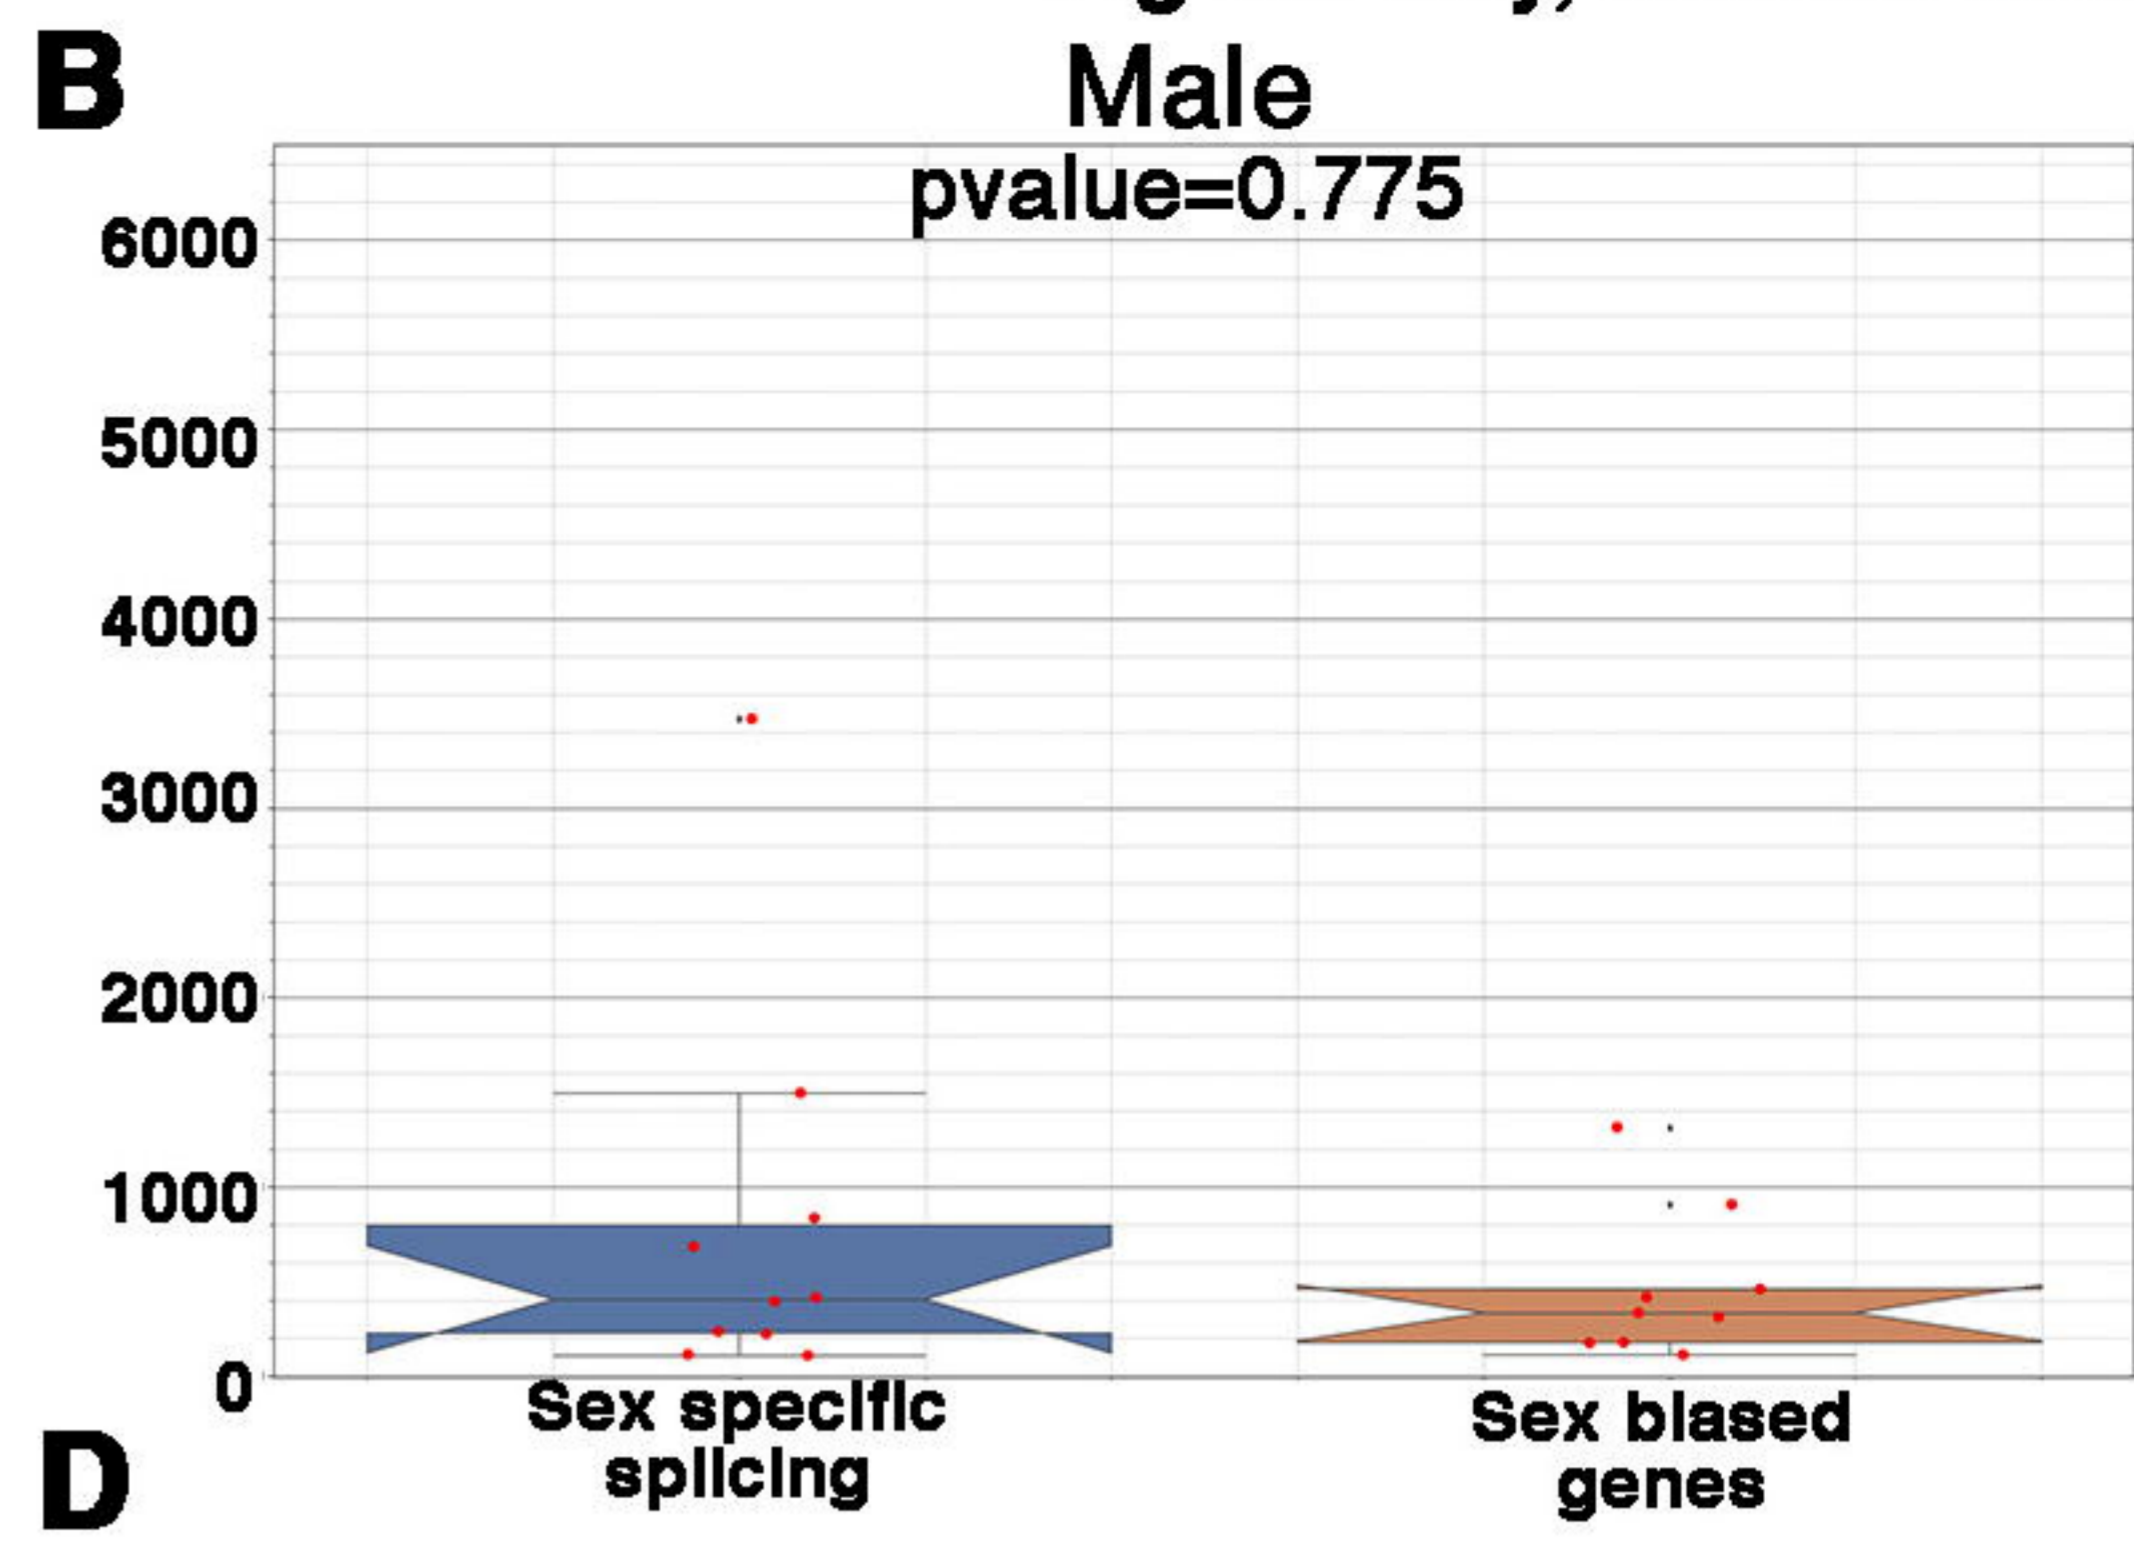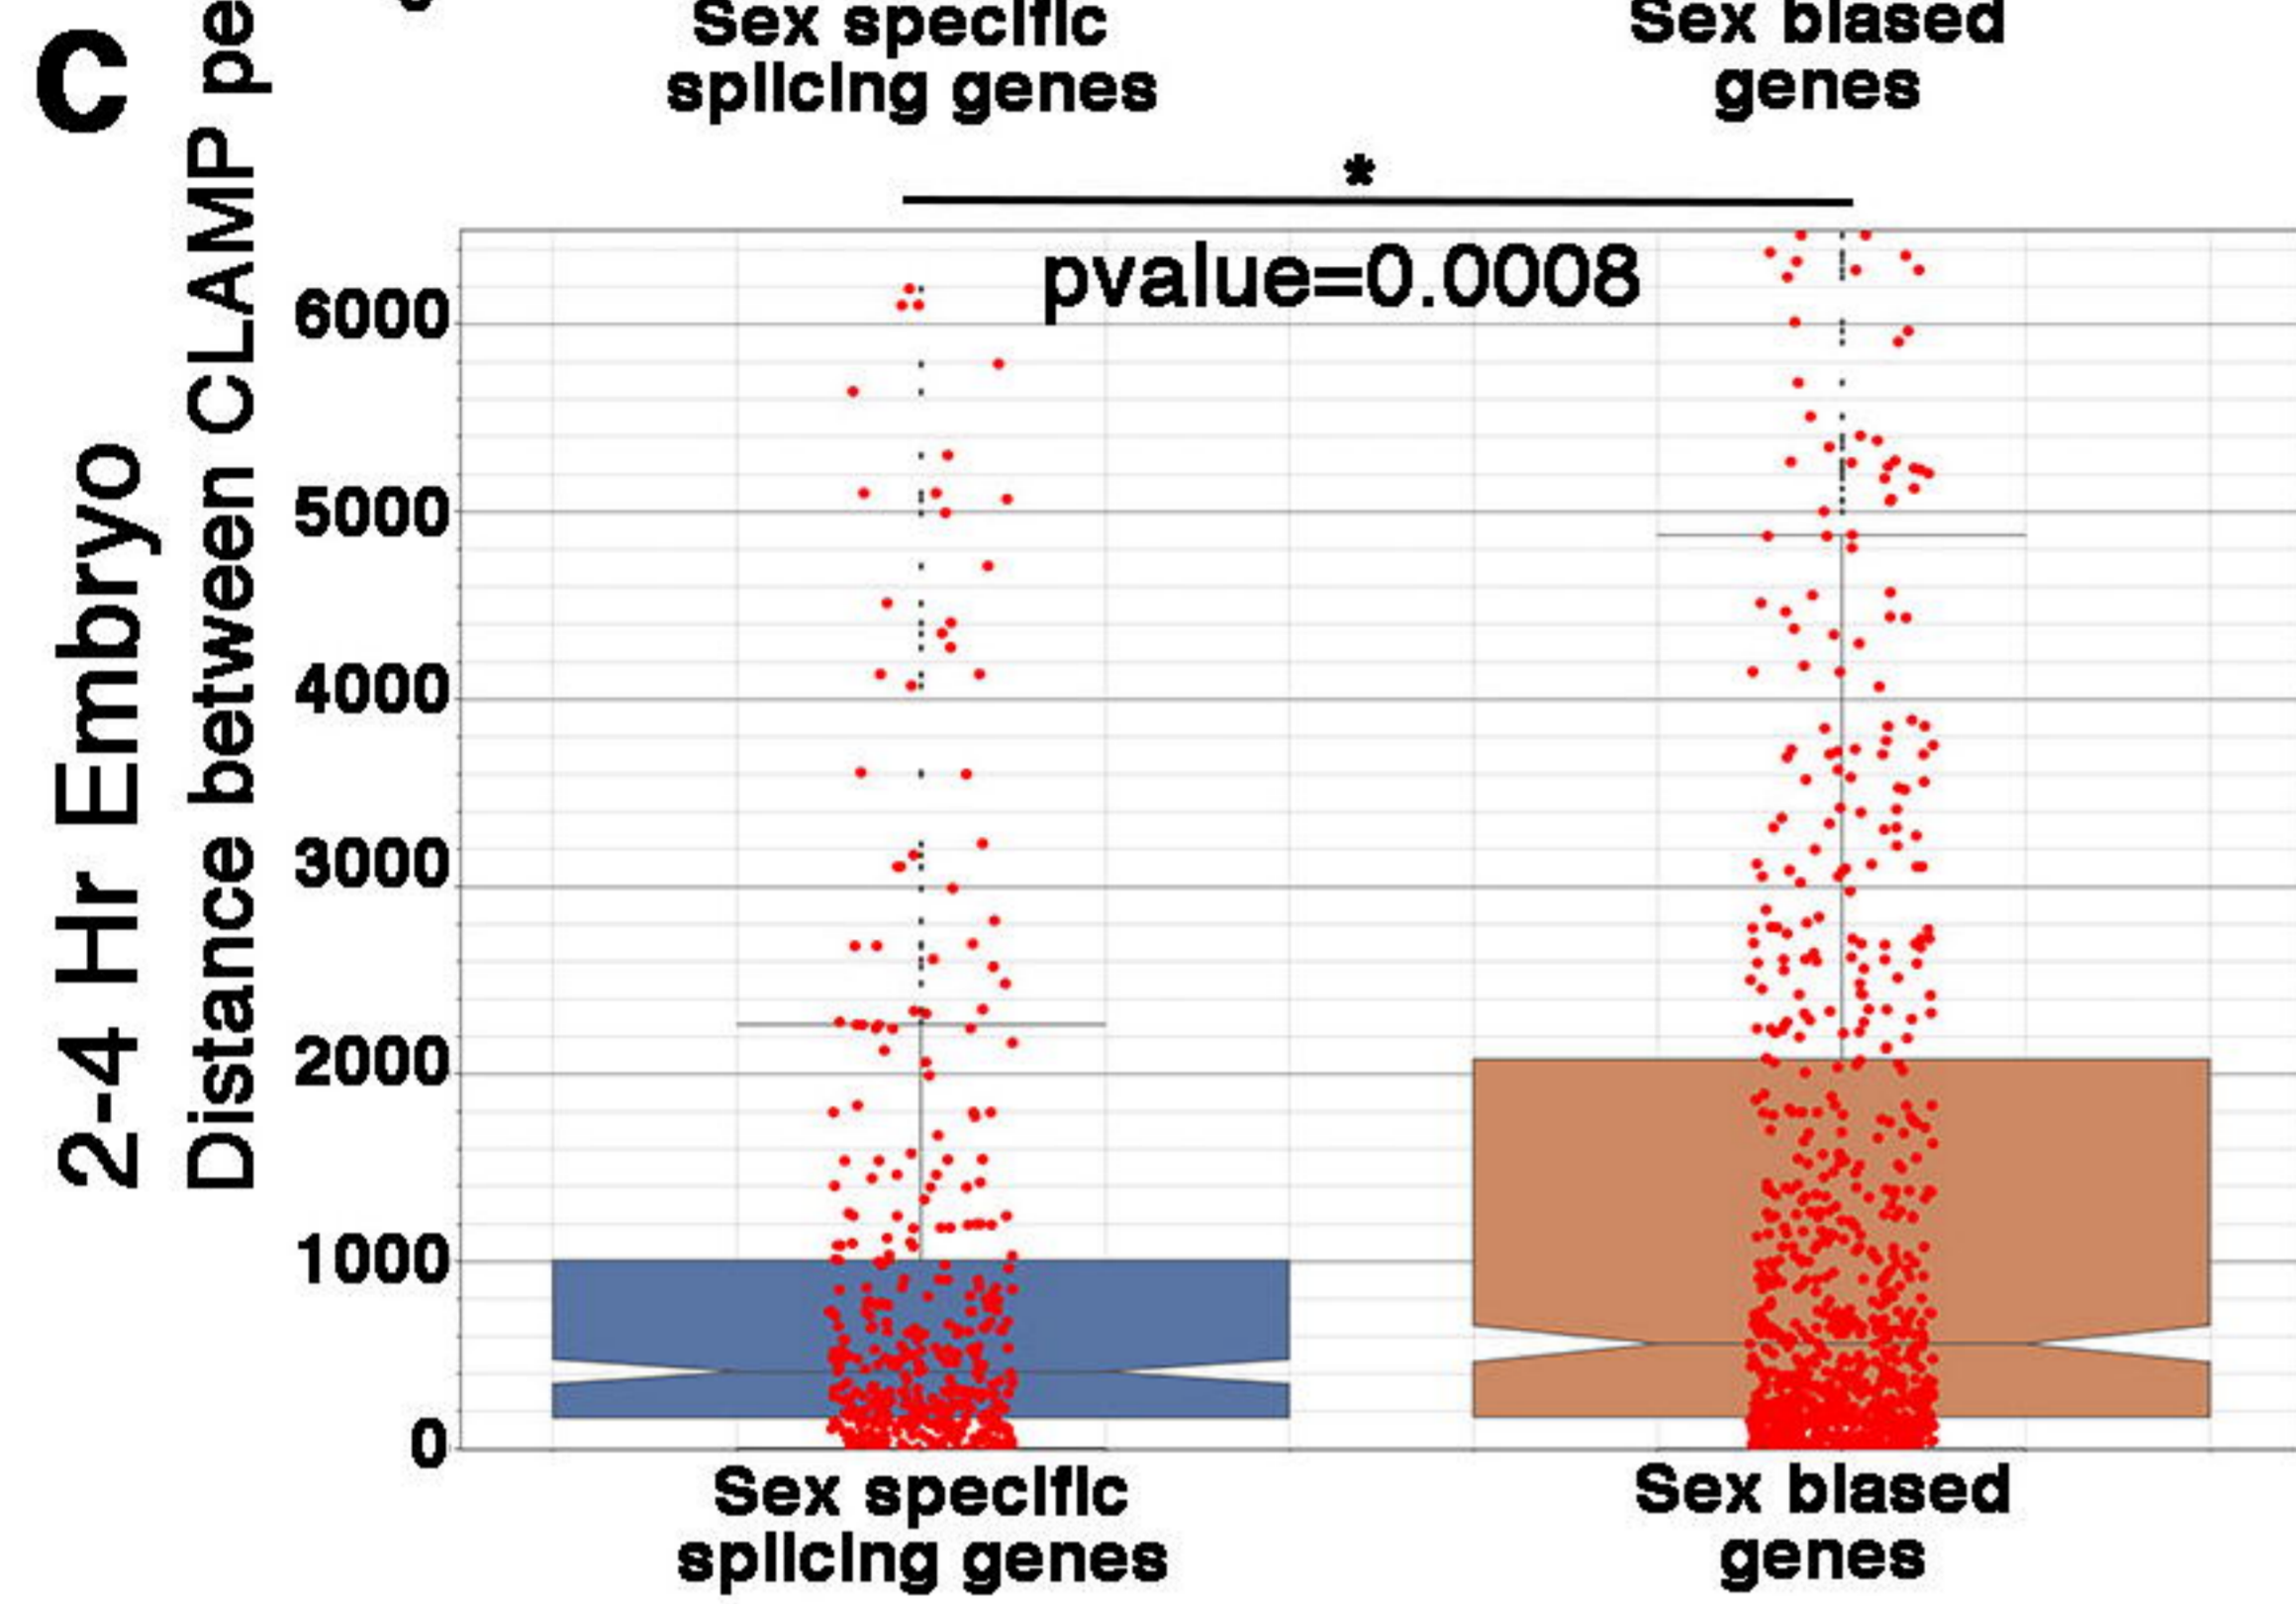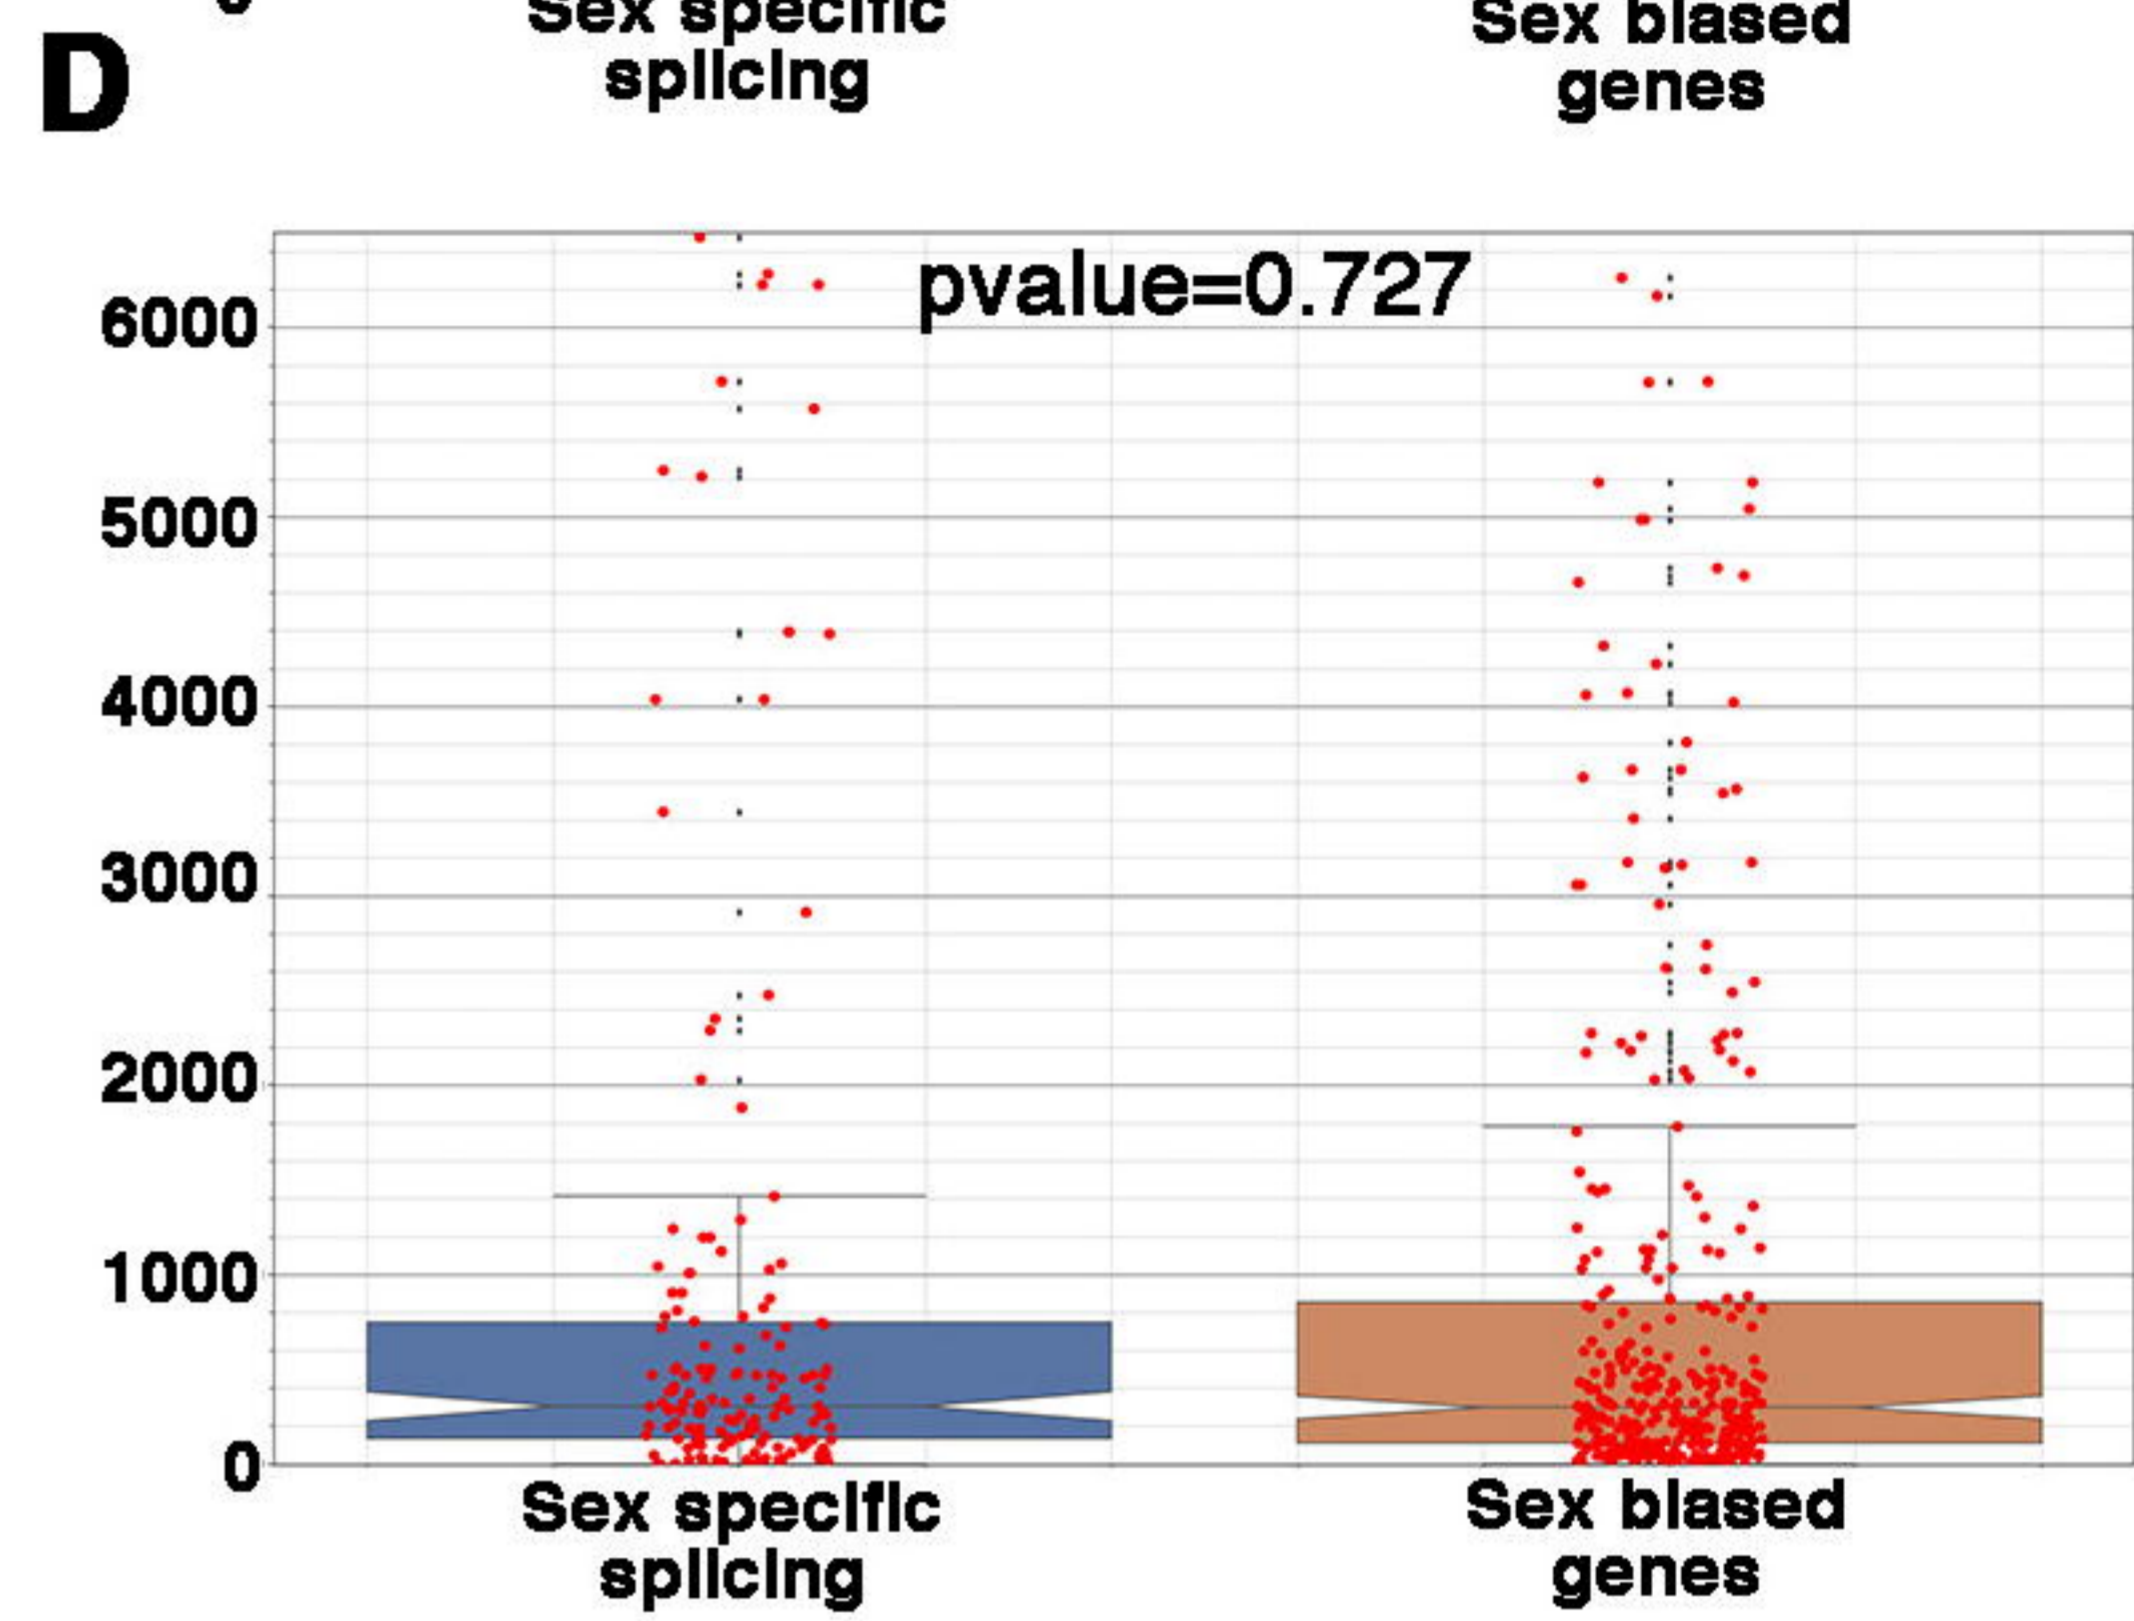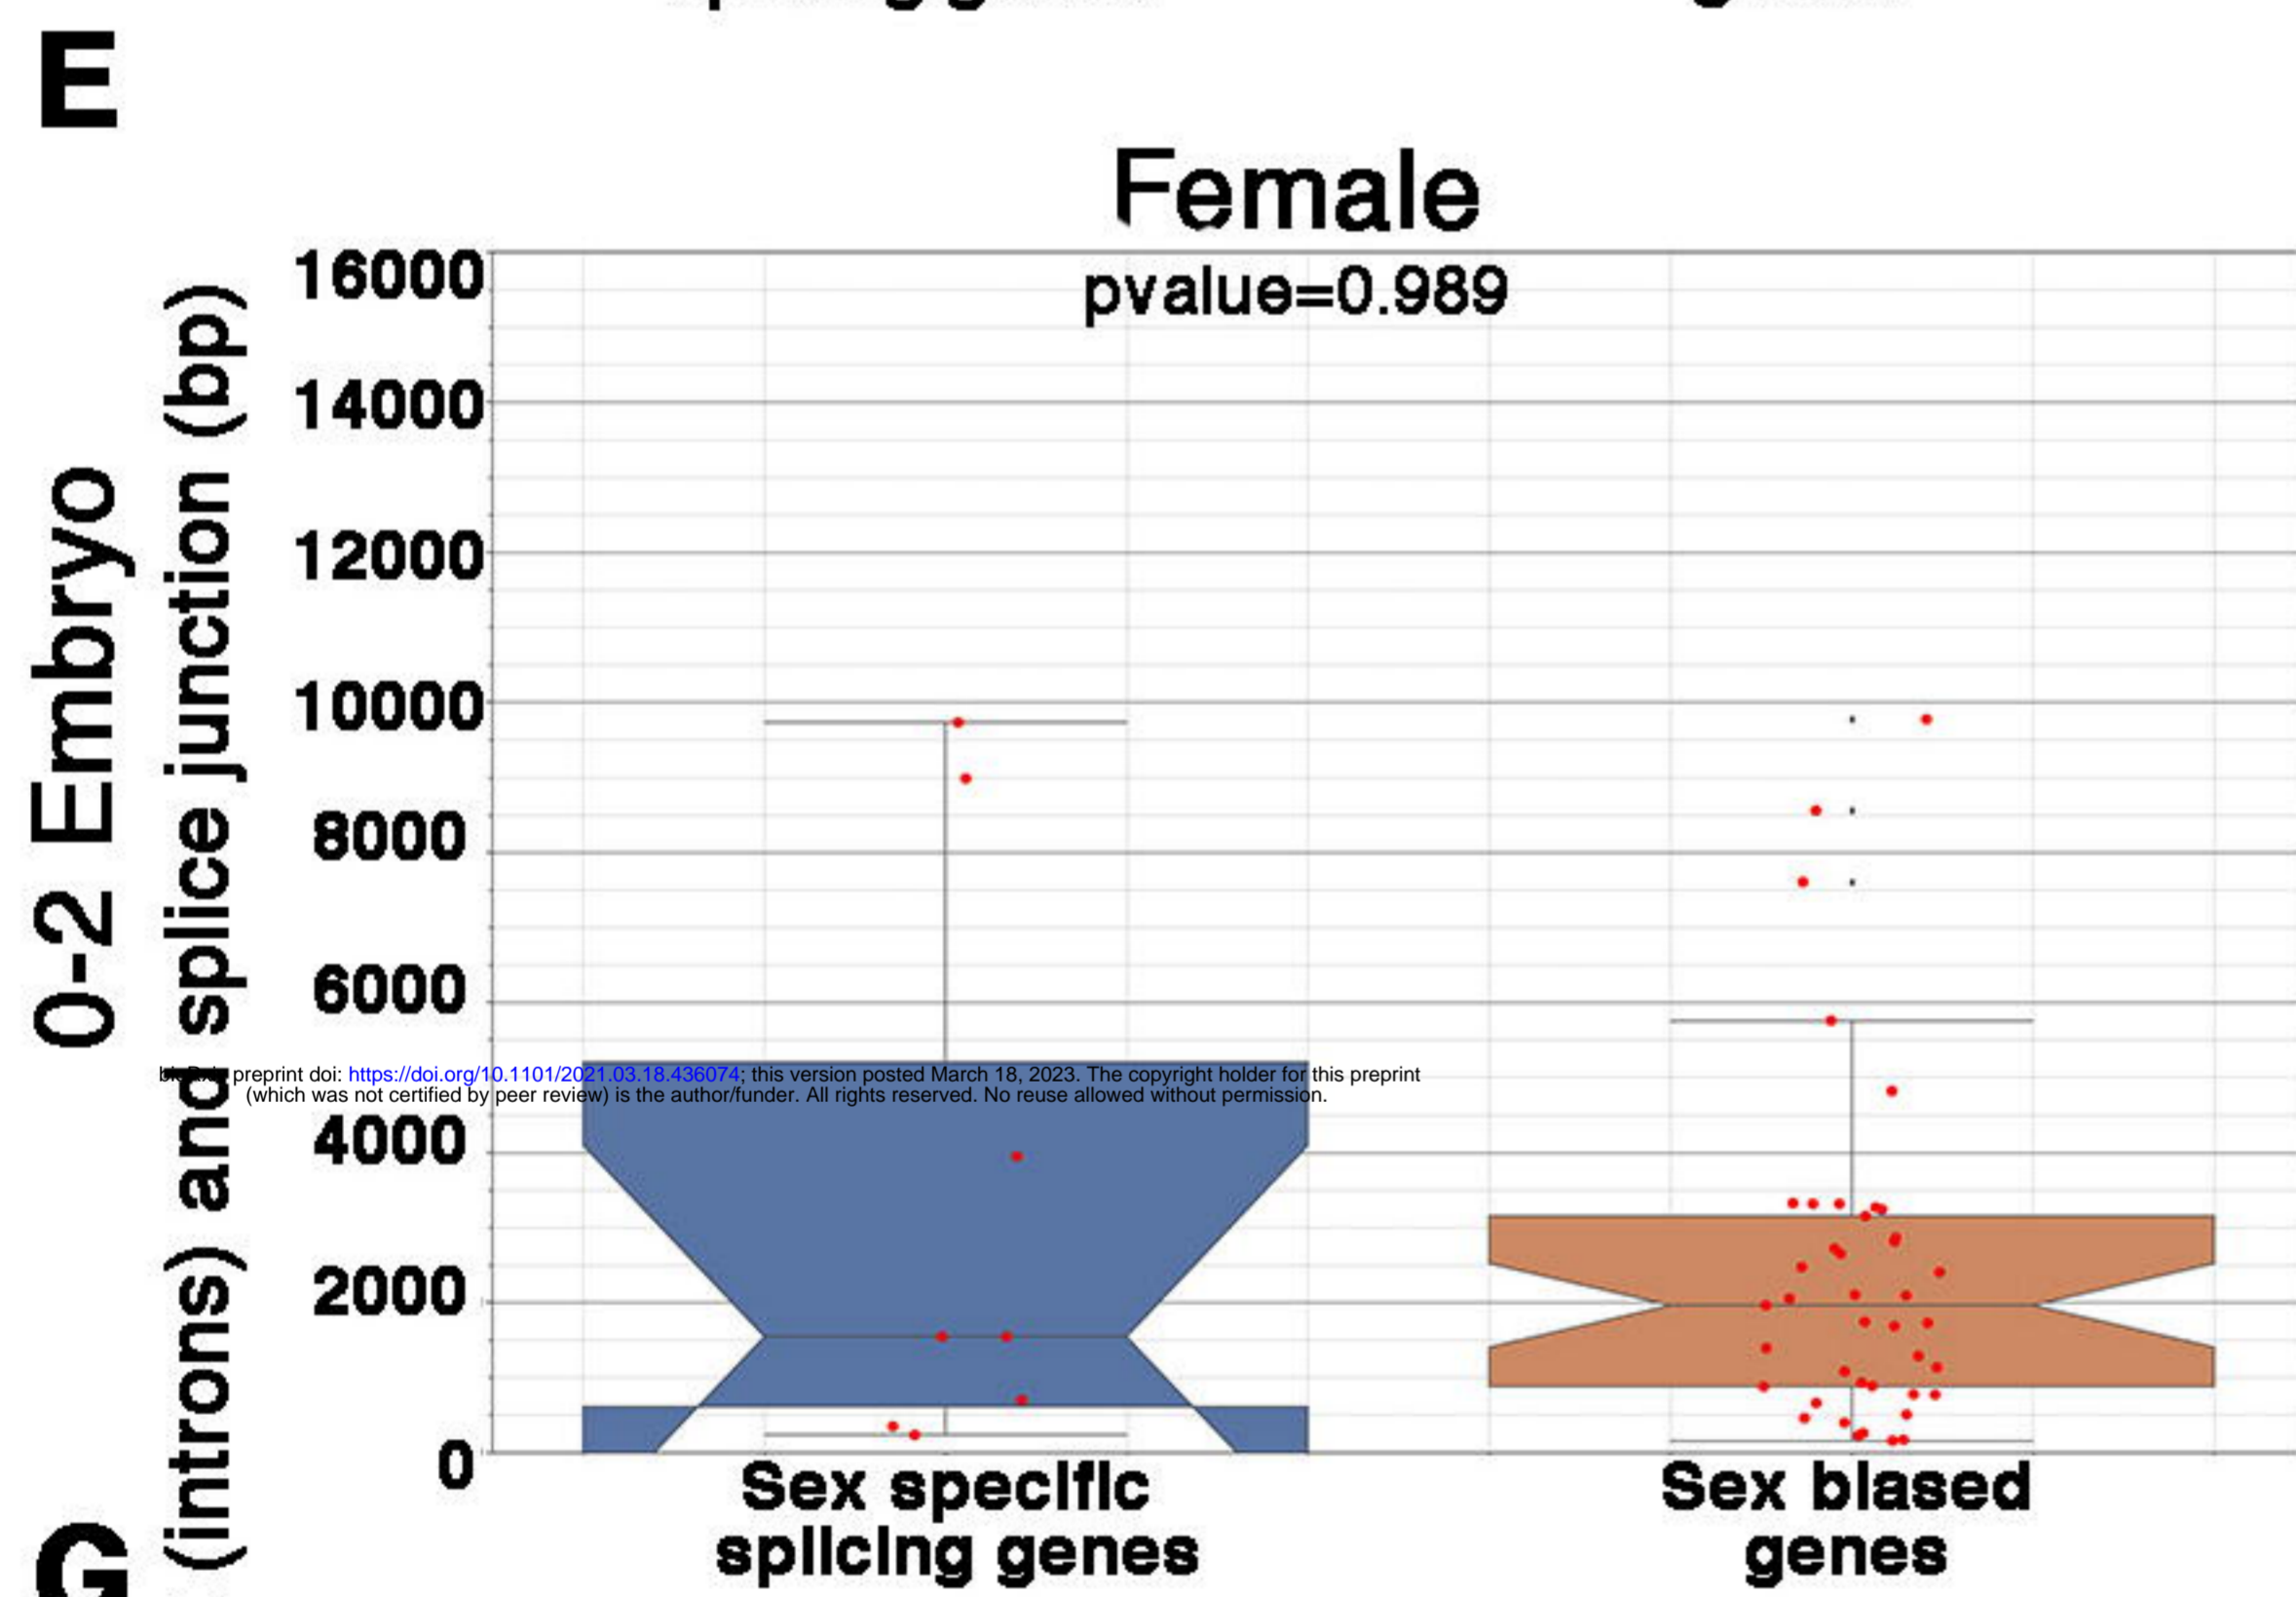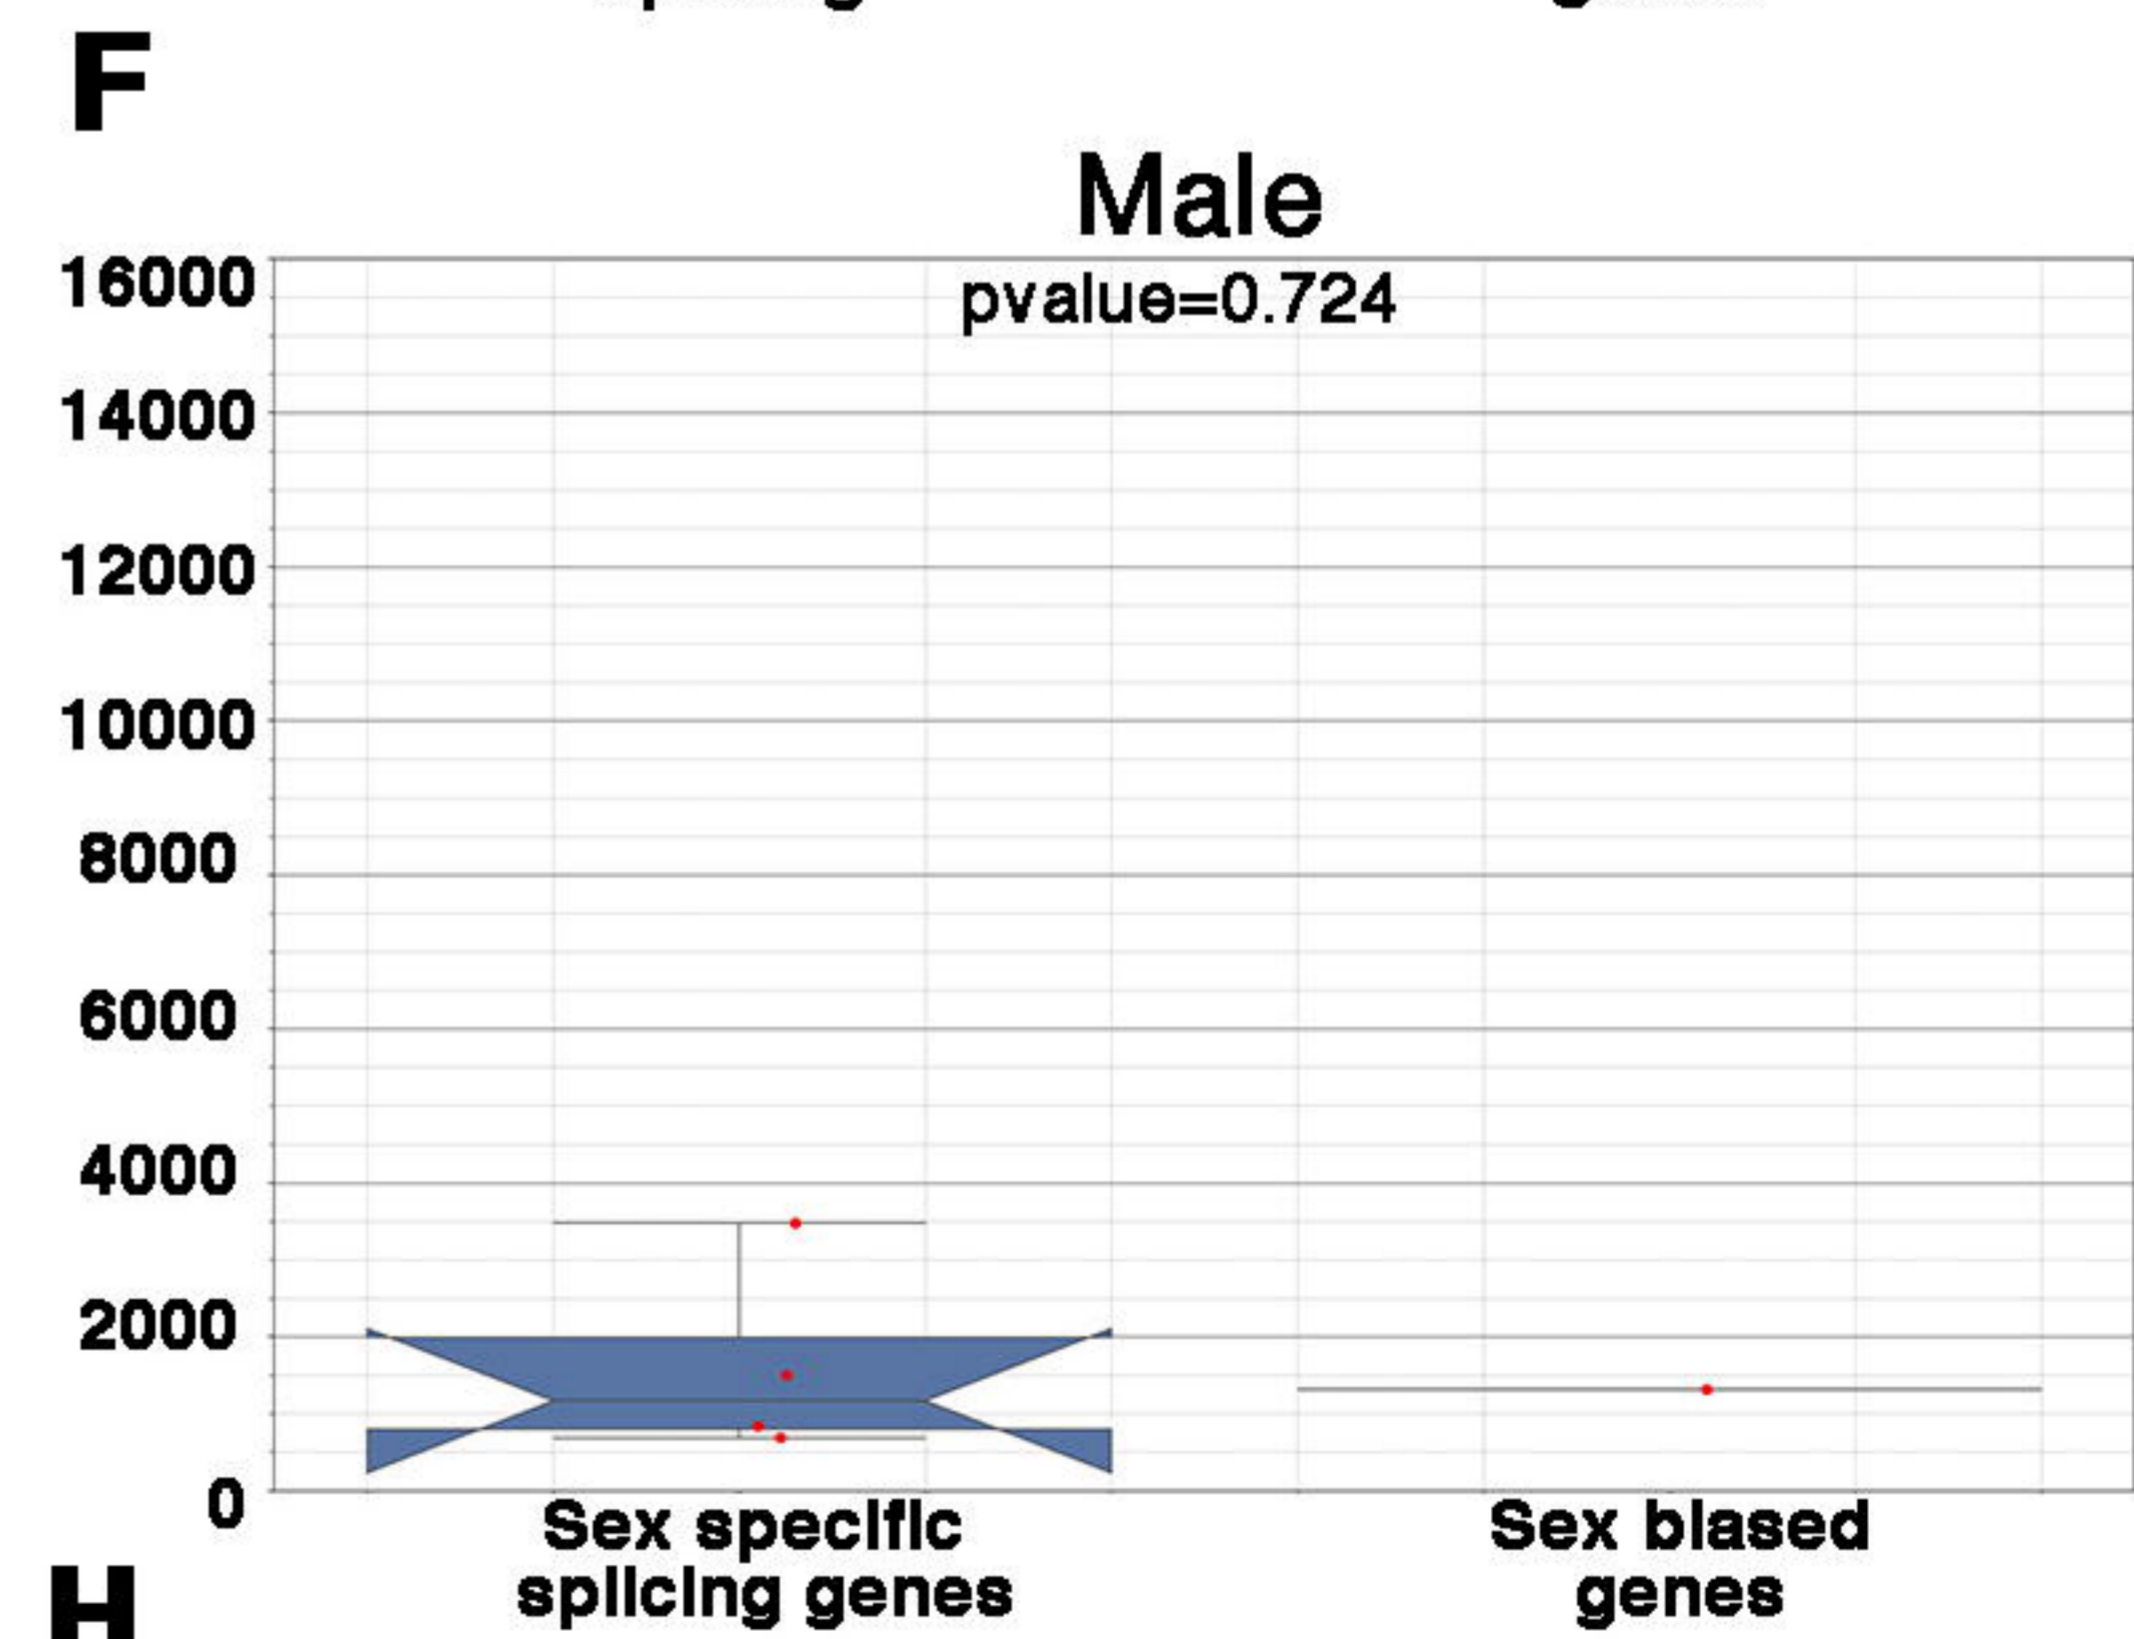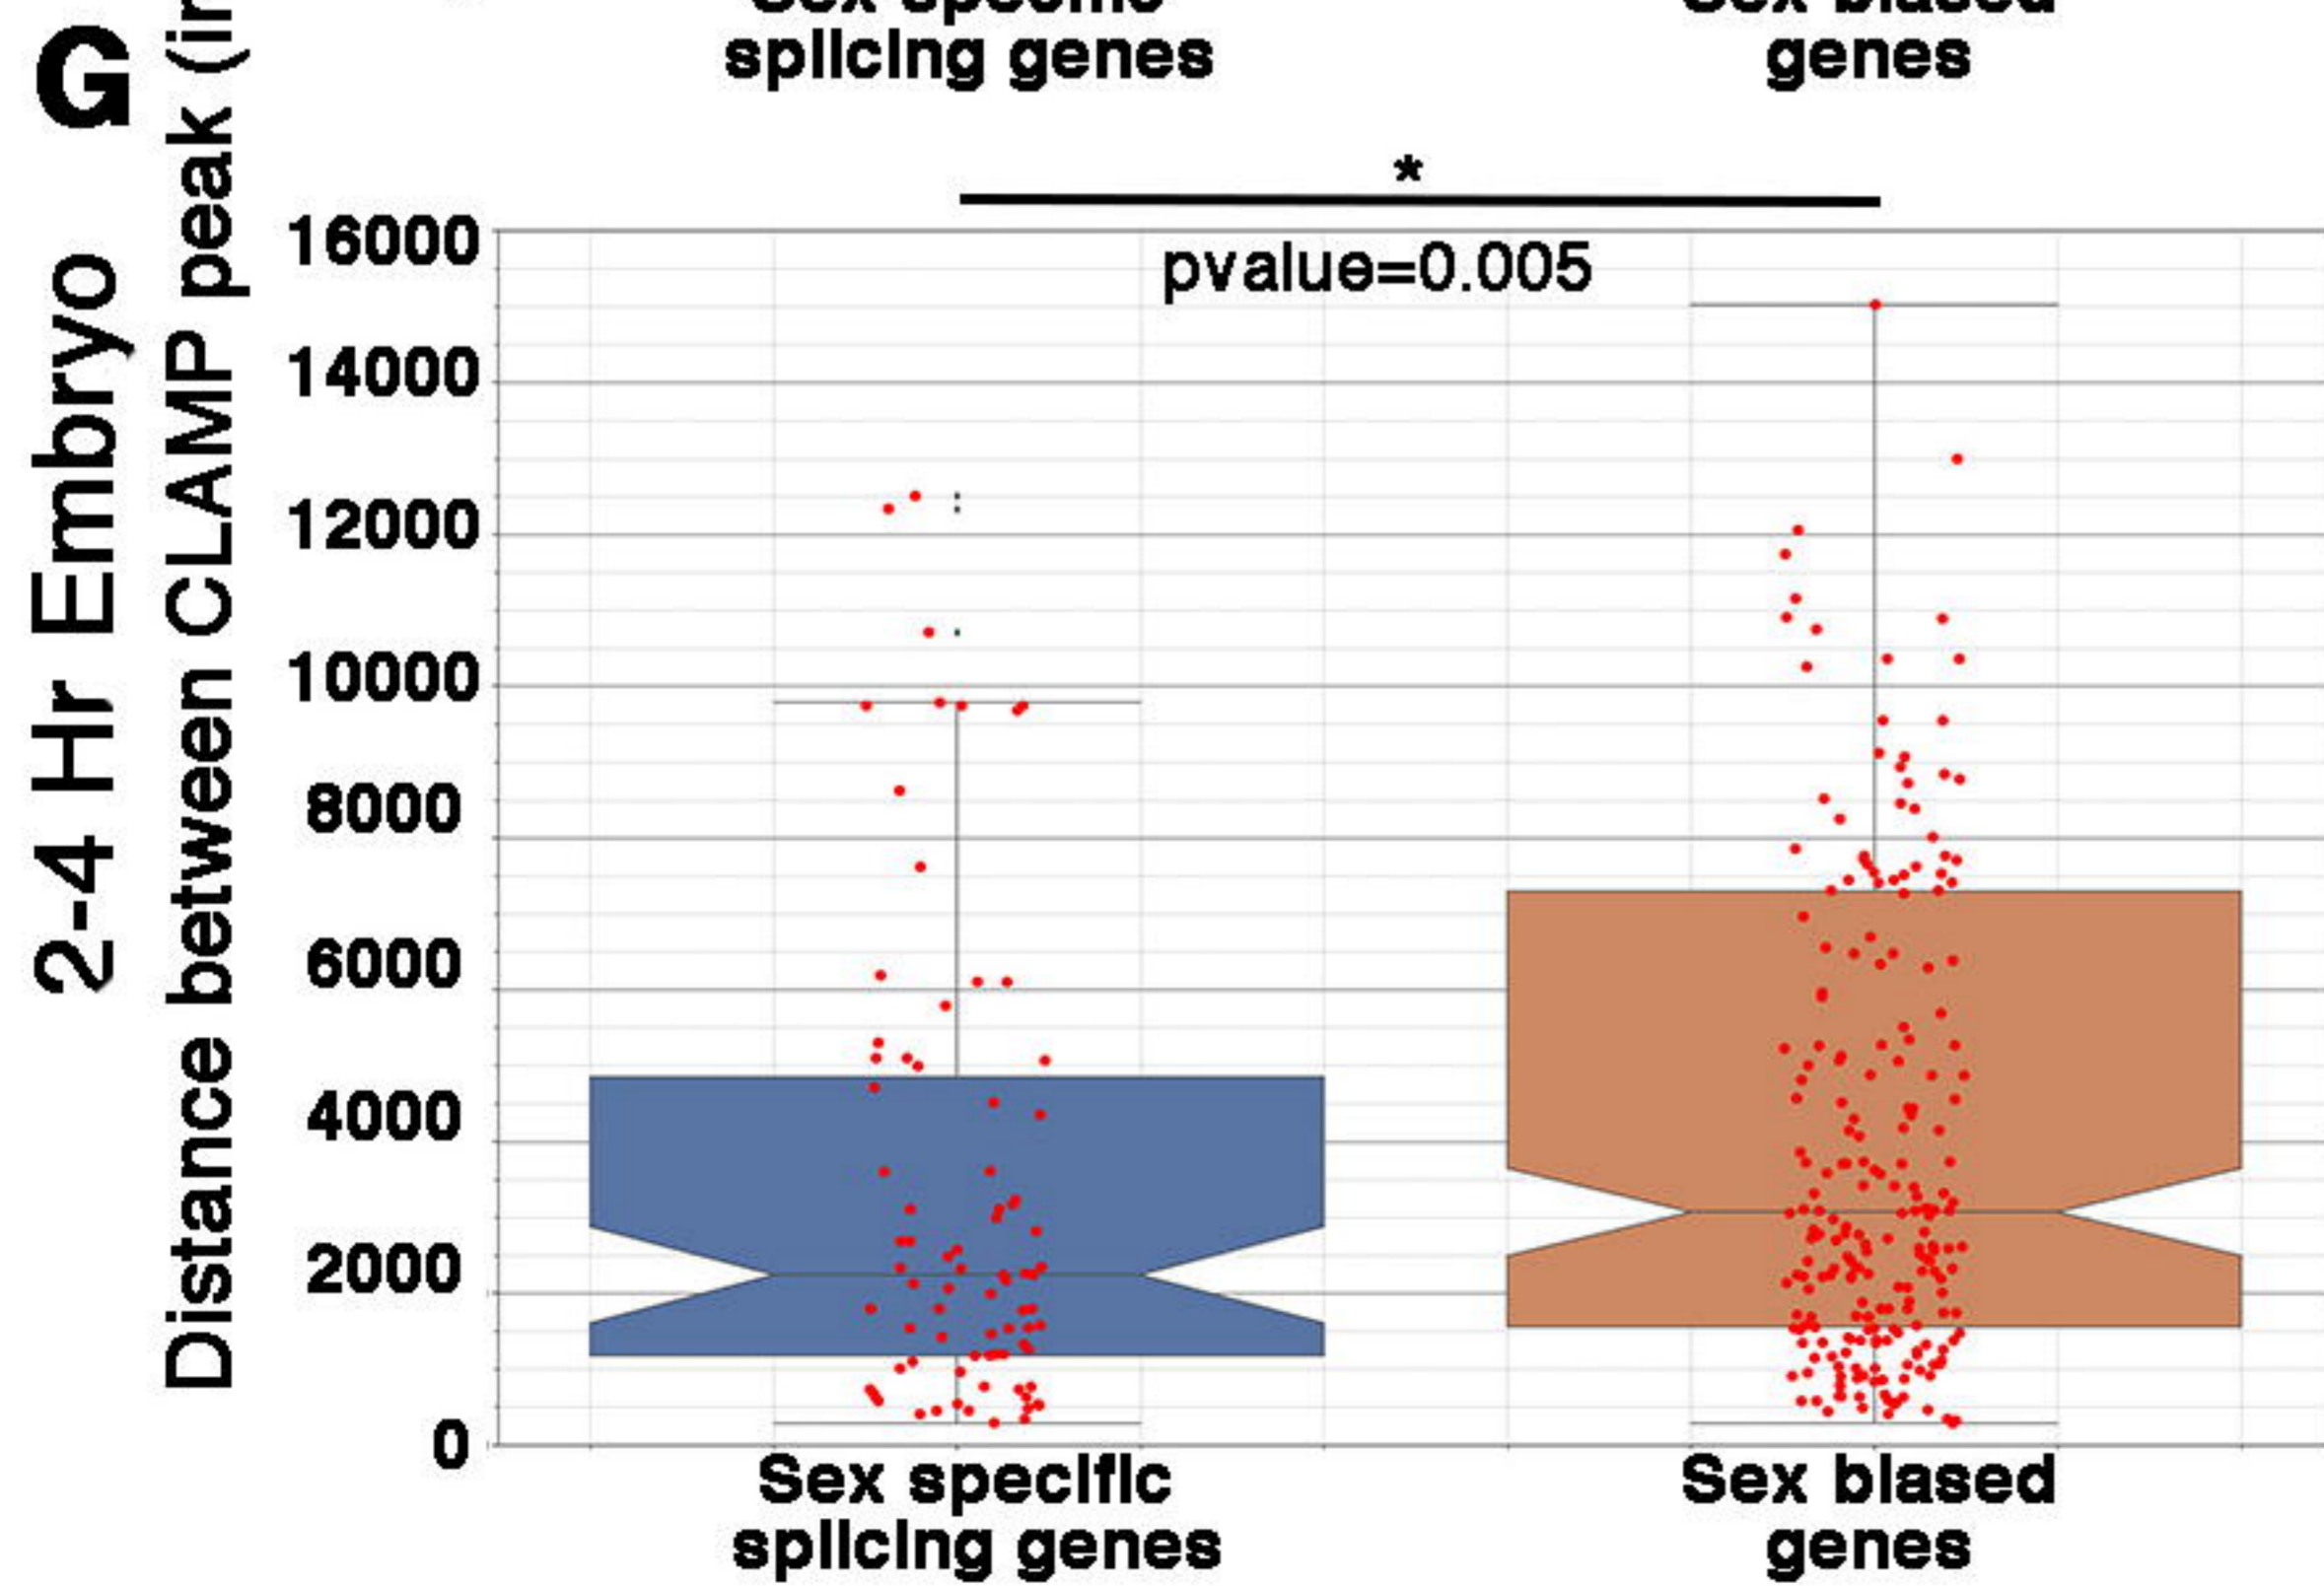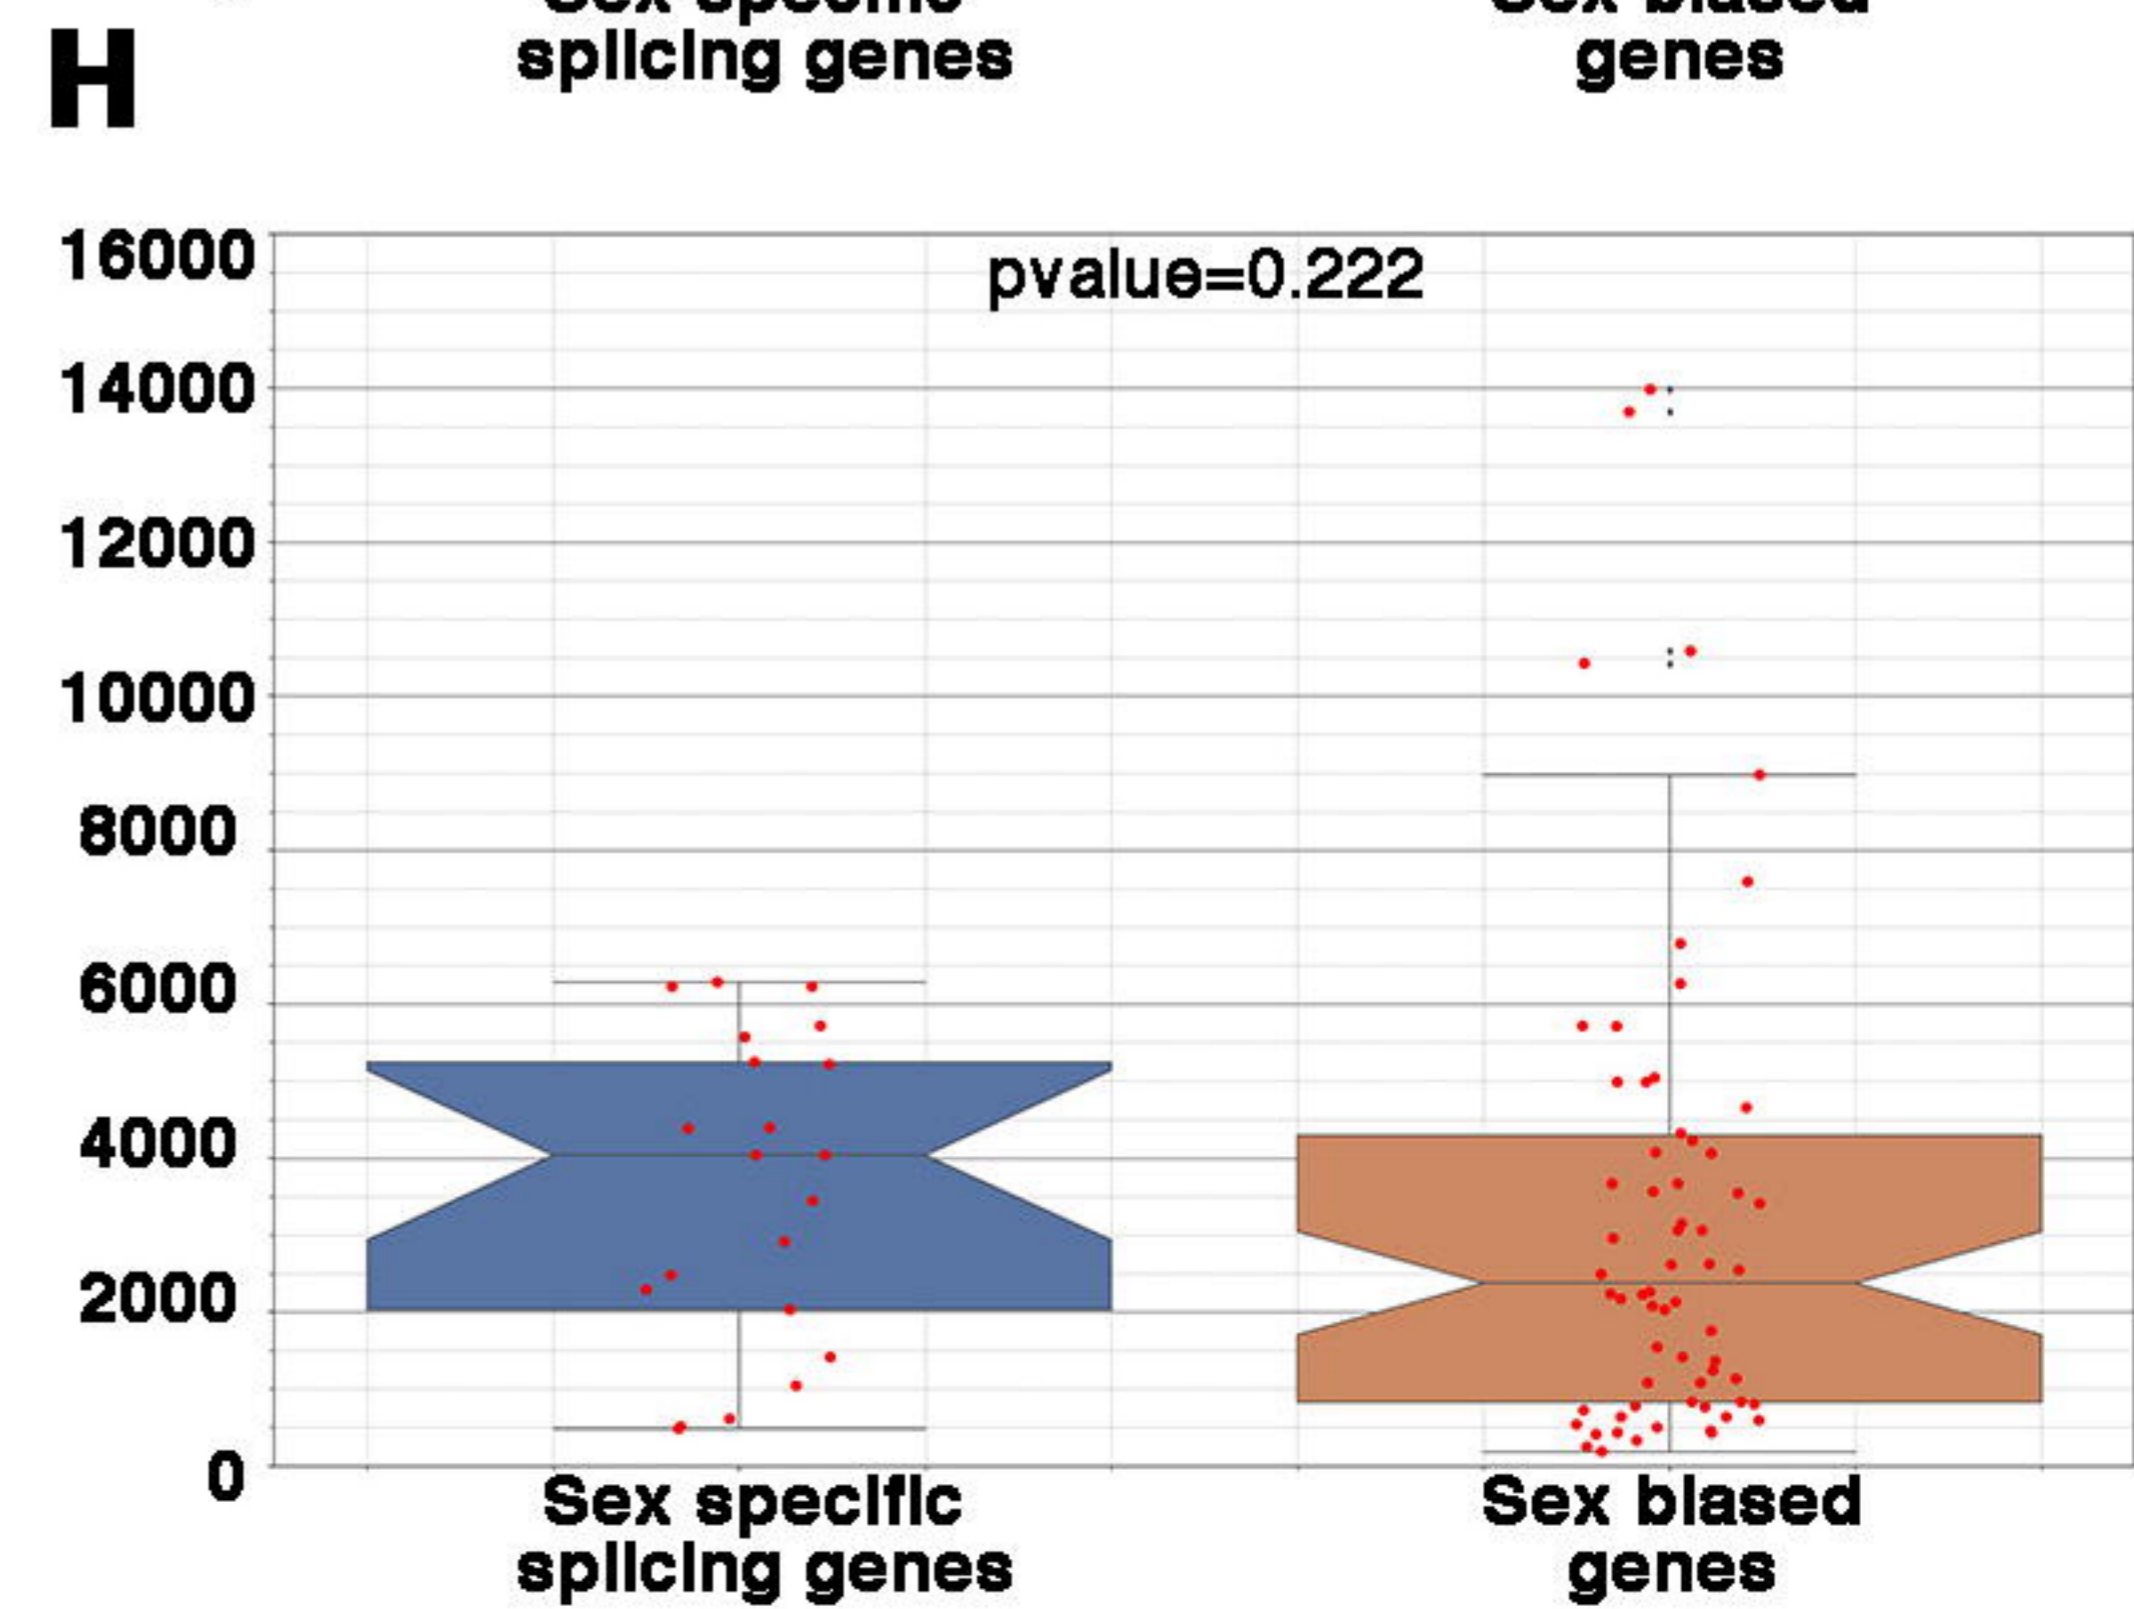

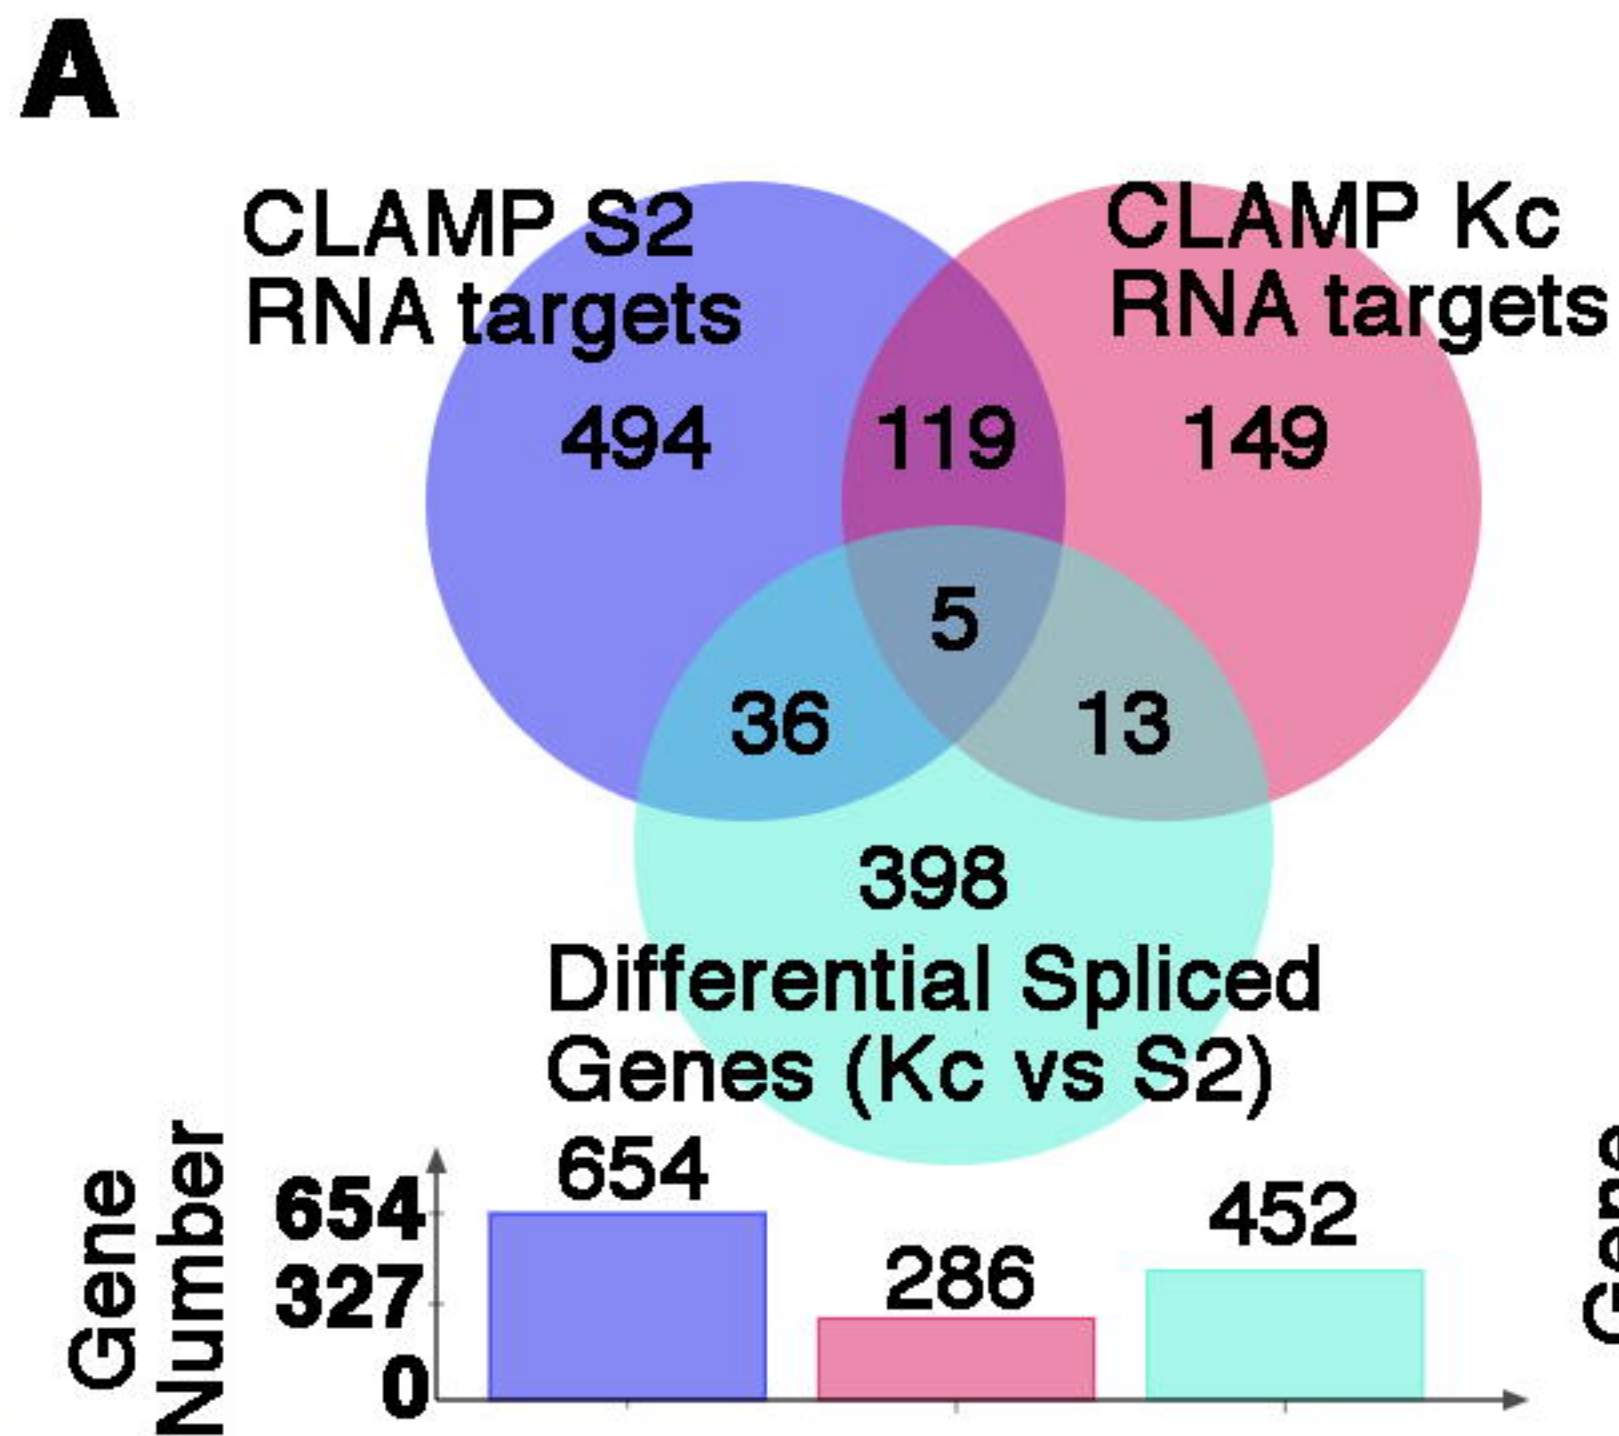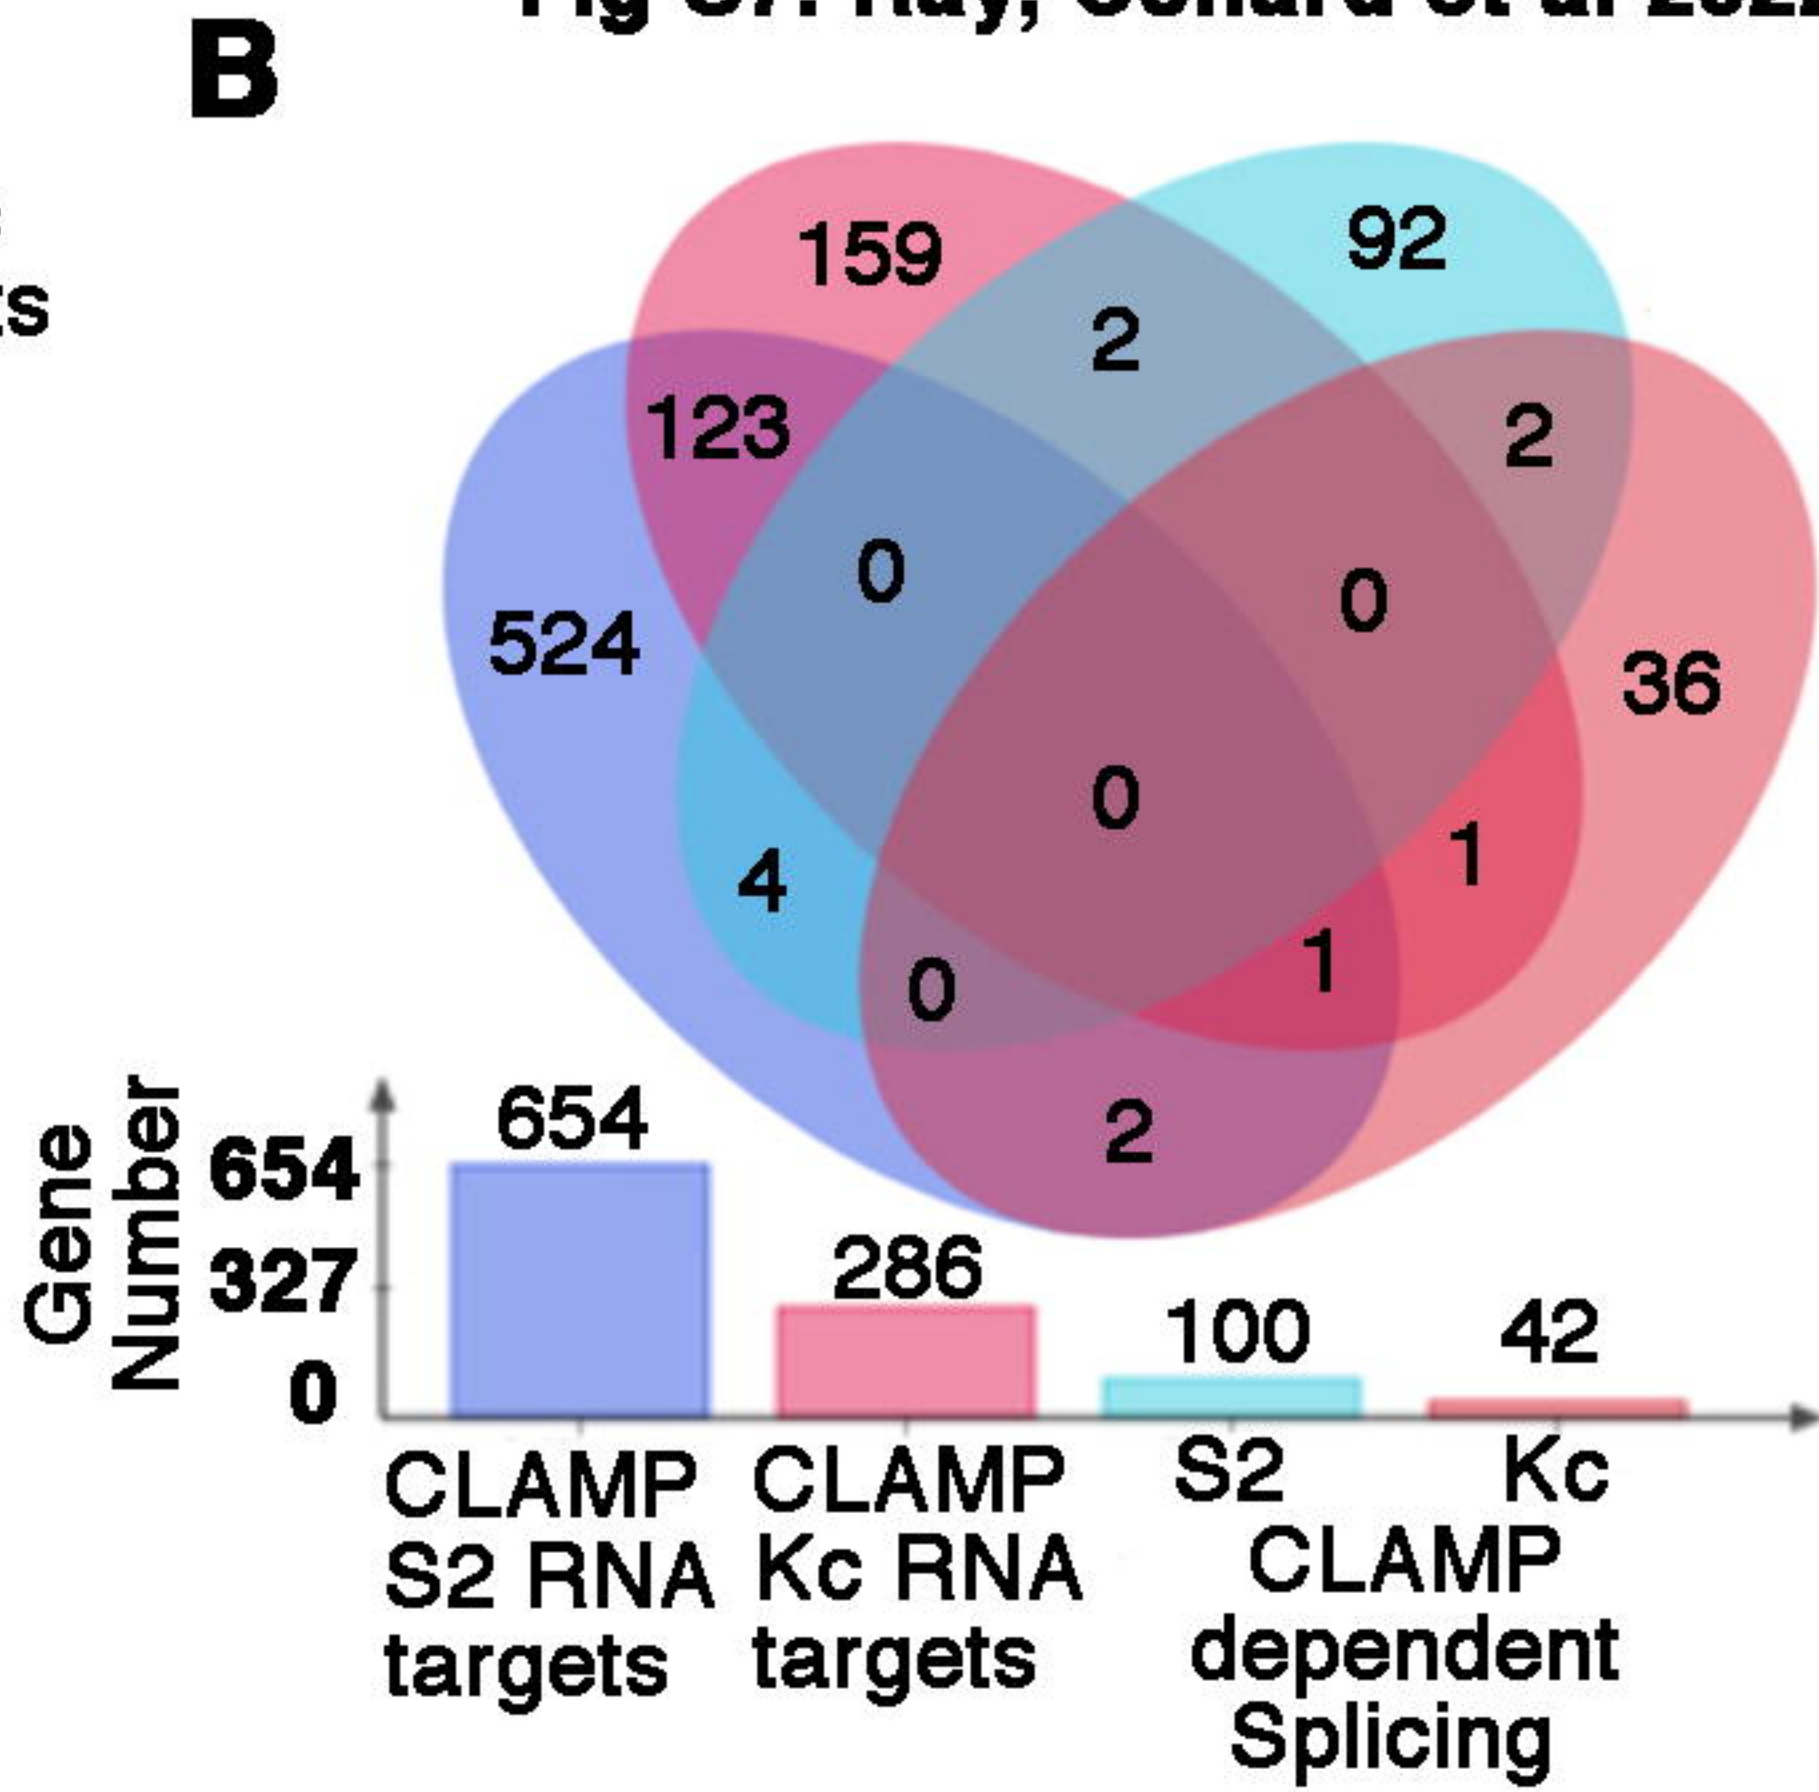

X-chromosome

Autosomes

**A** *MTD-GAL4>UAS-GFPRNAi*

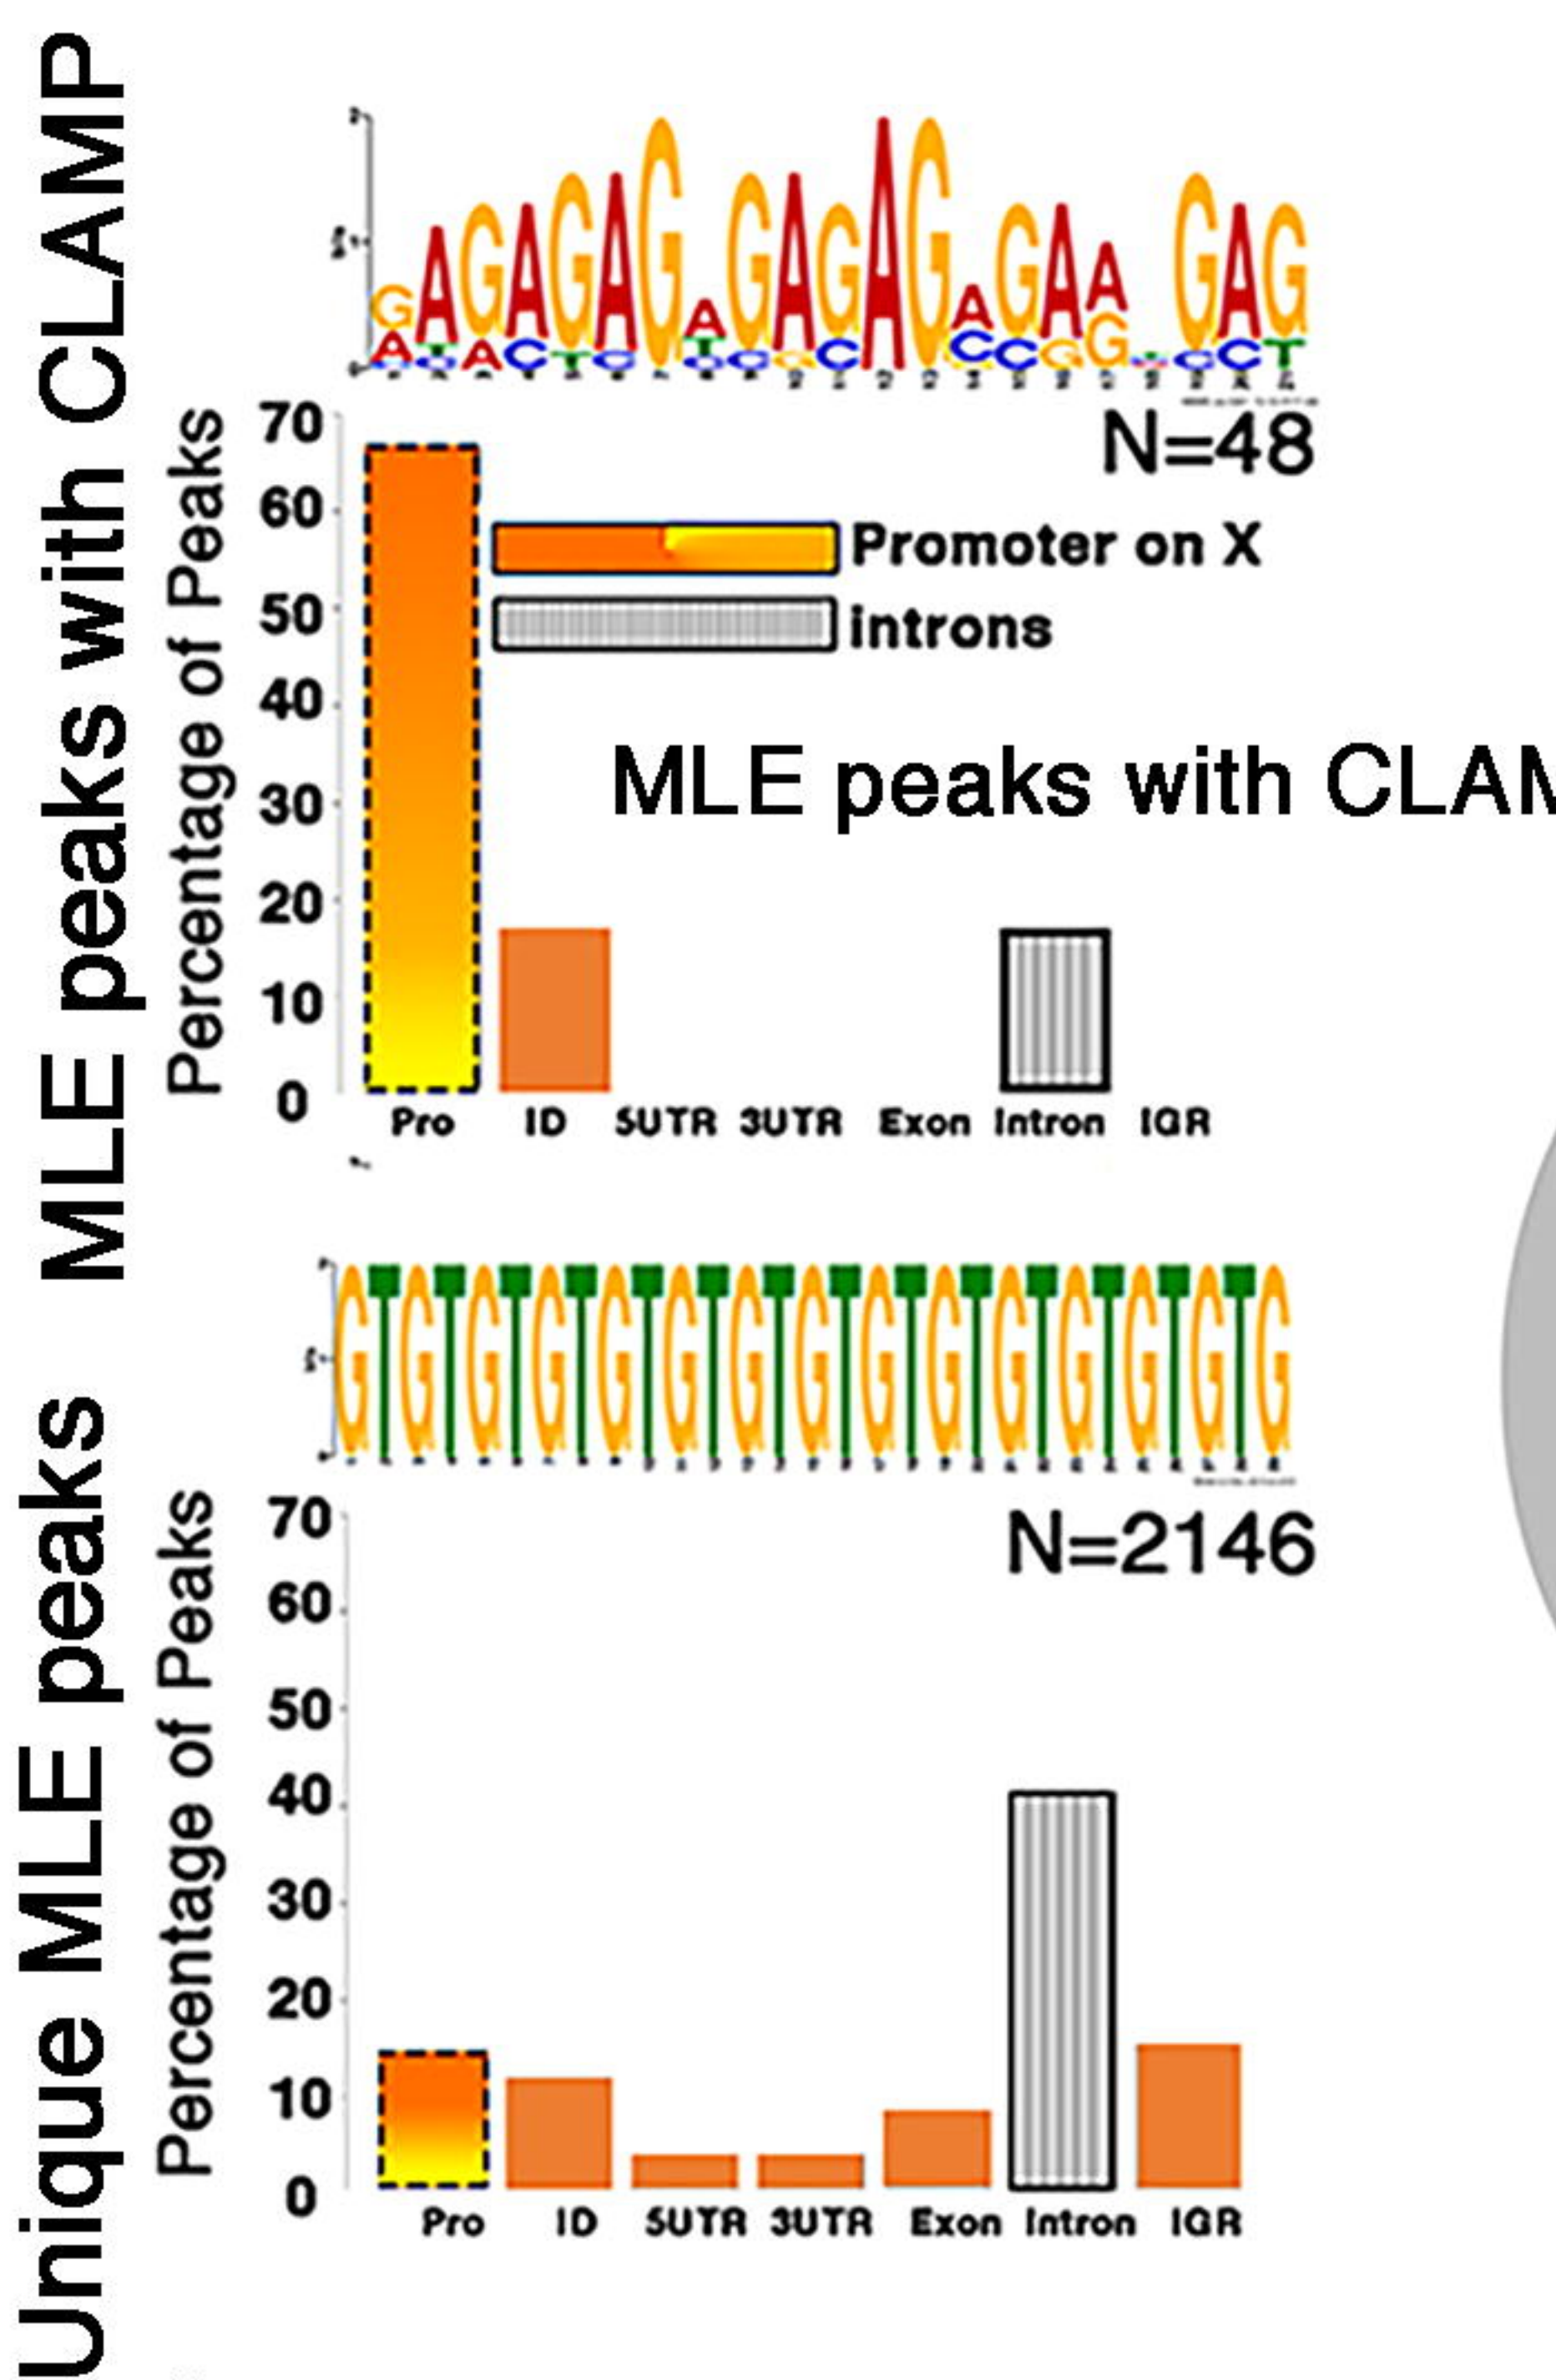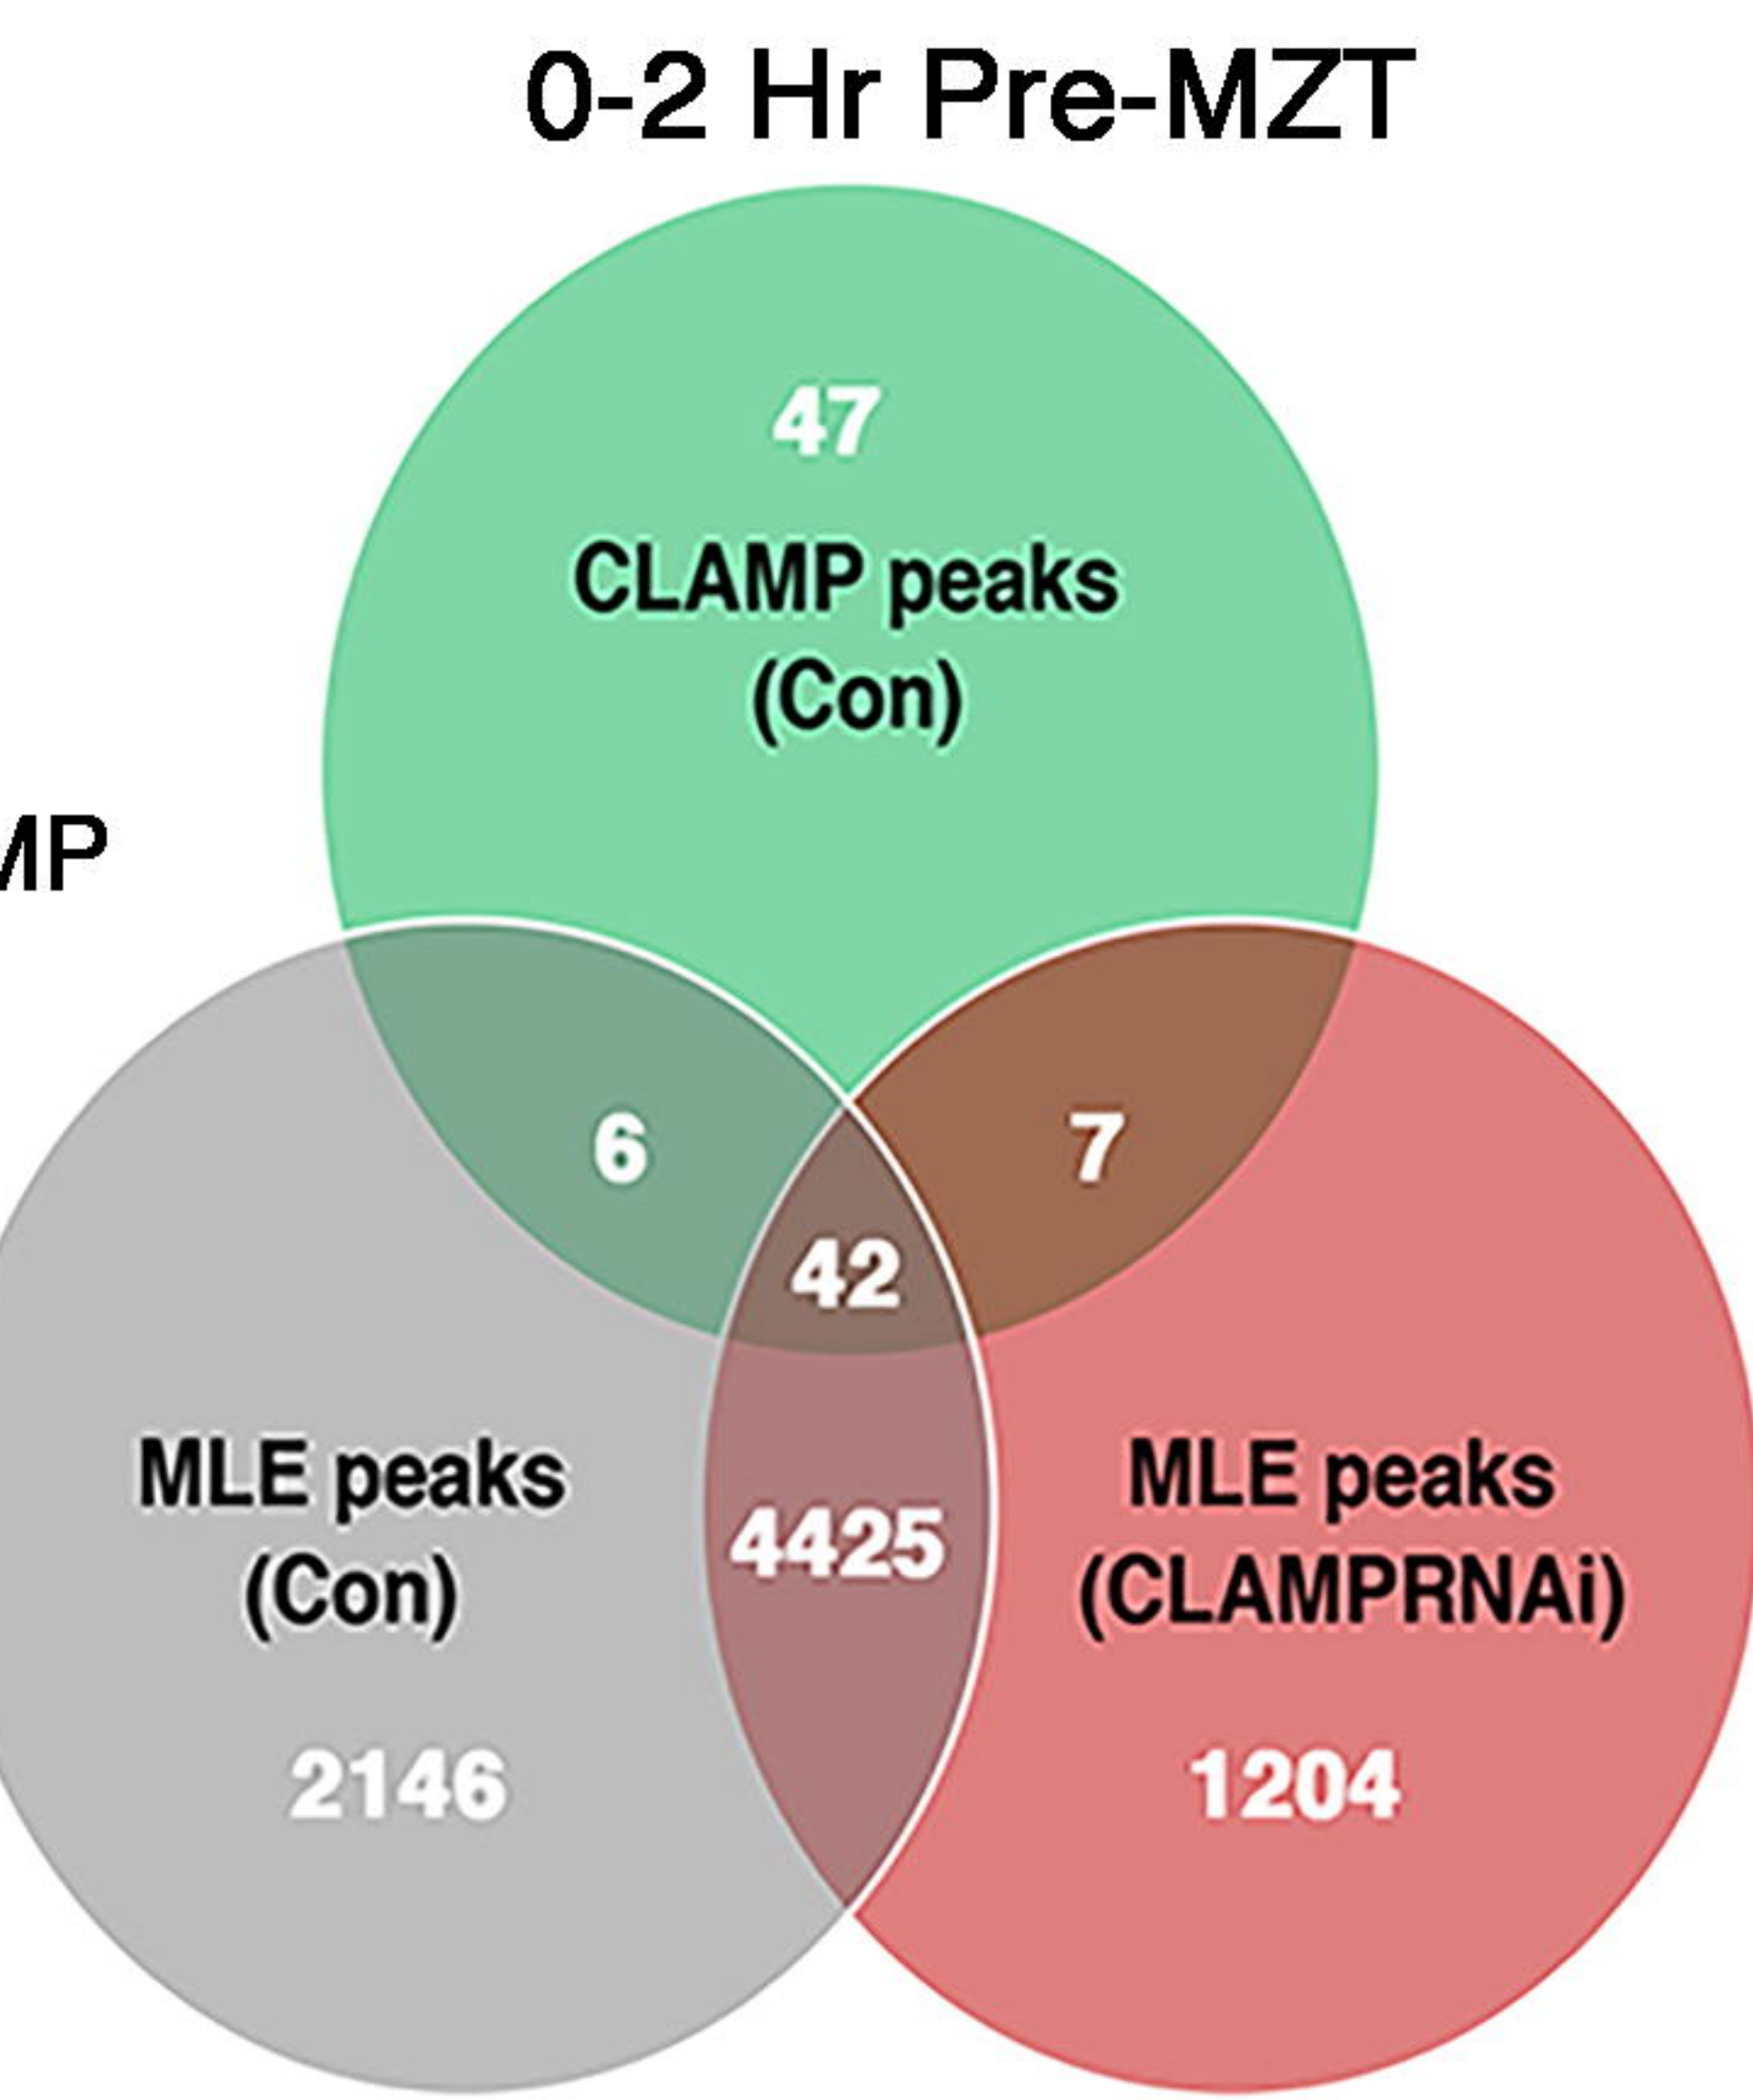

*MTD-GAL4>UAS-CLAMPRNAi*

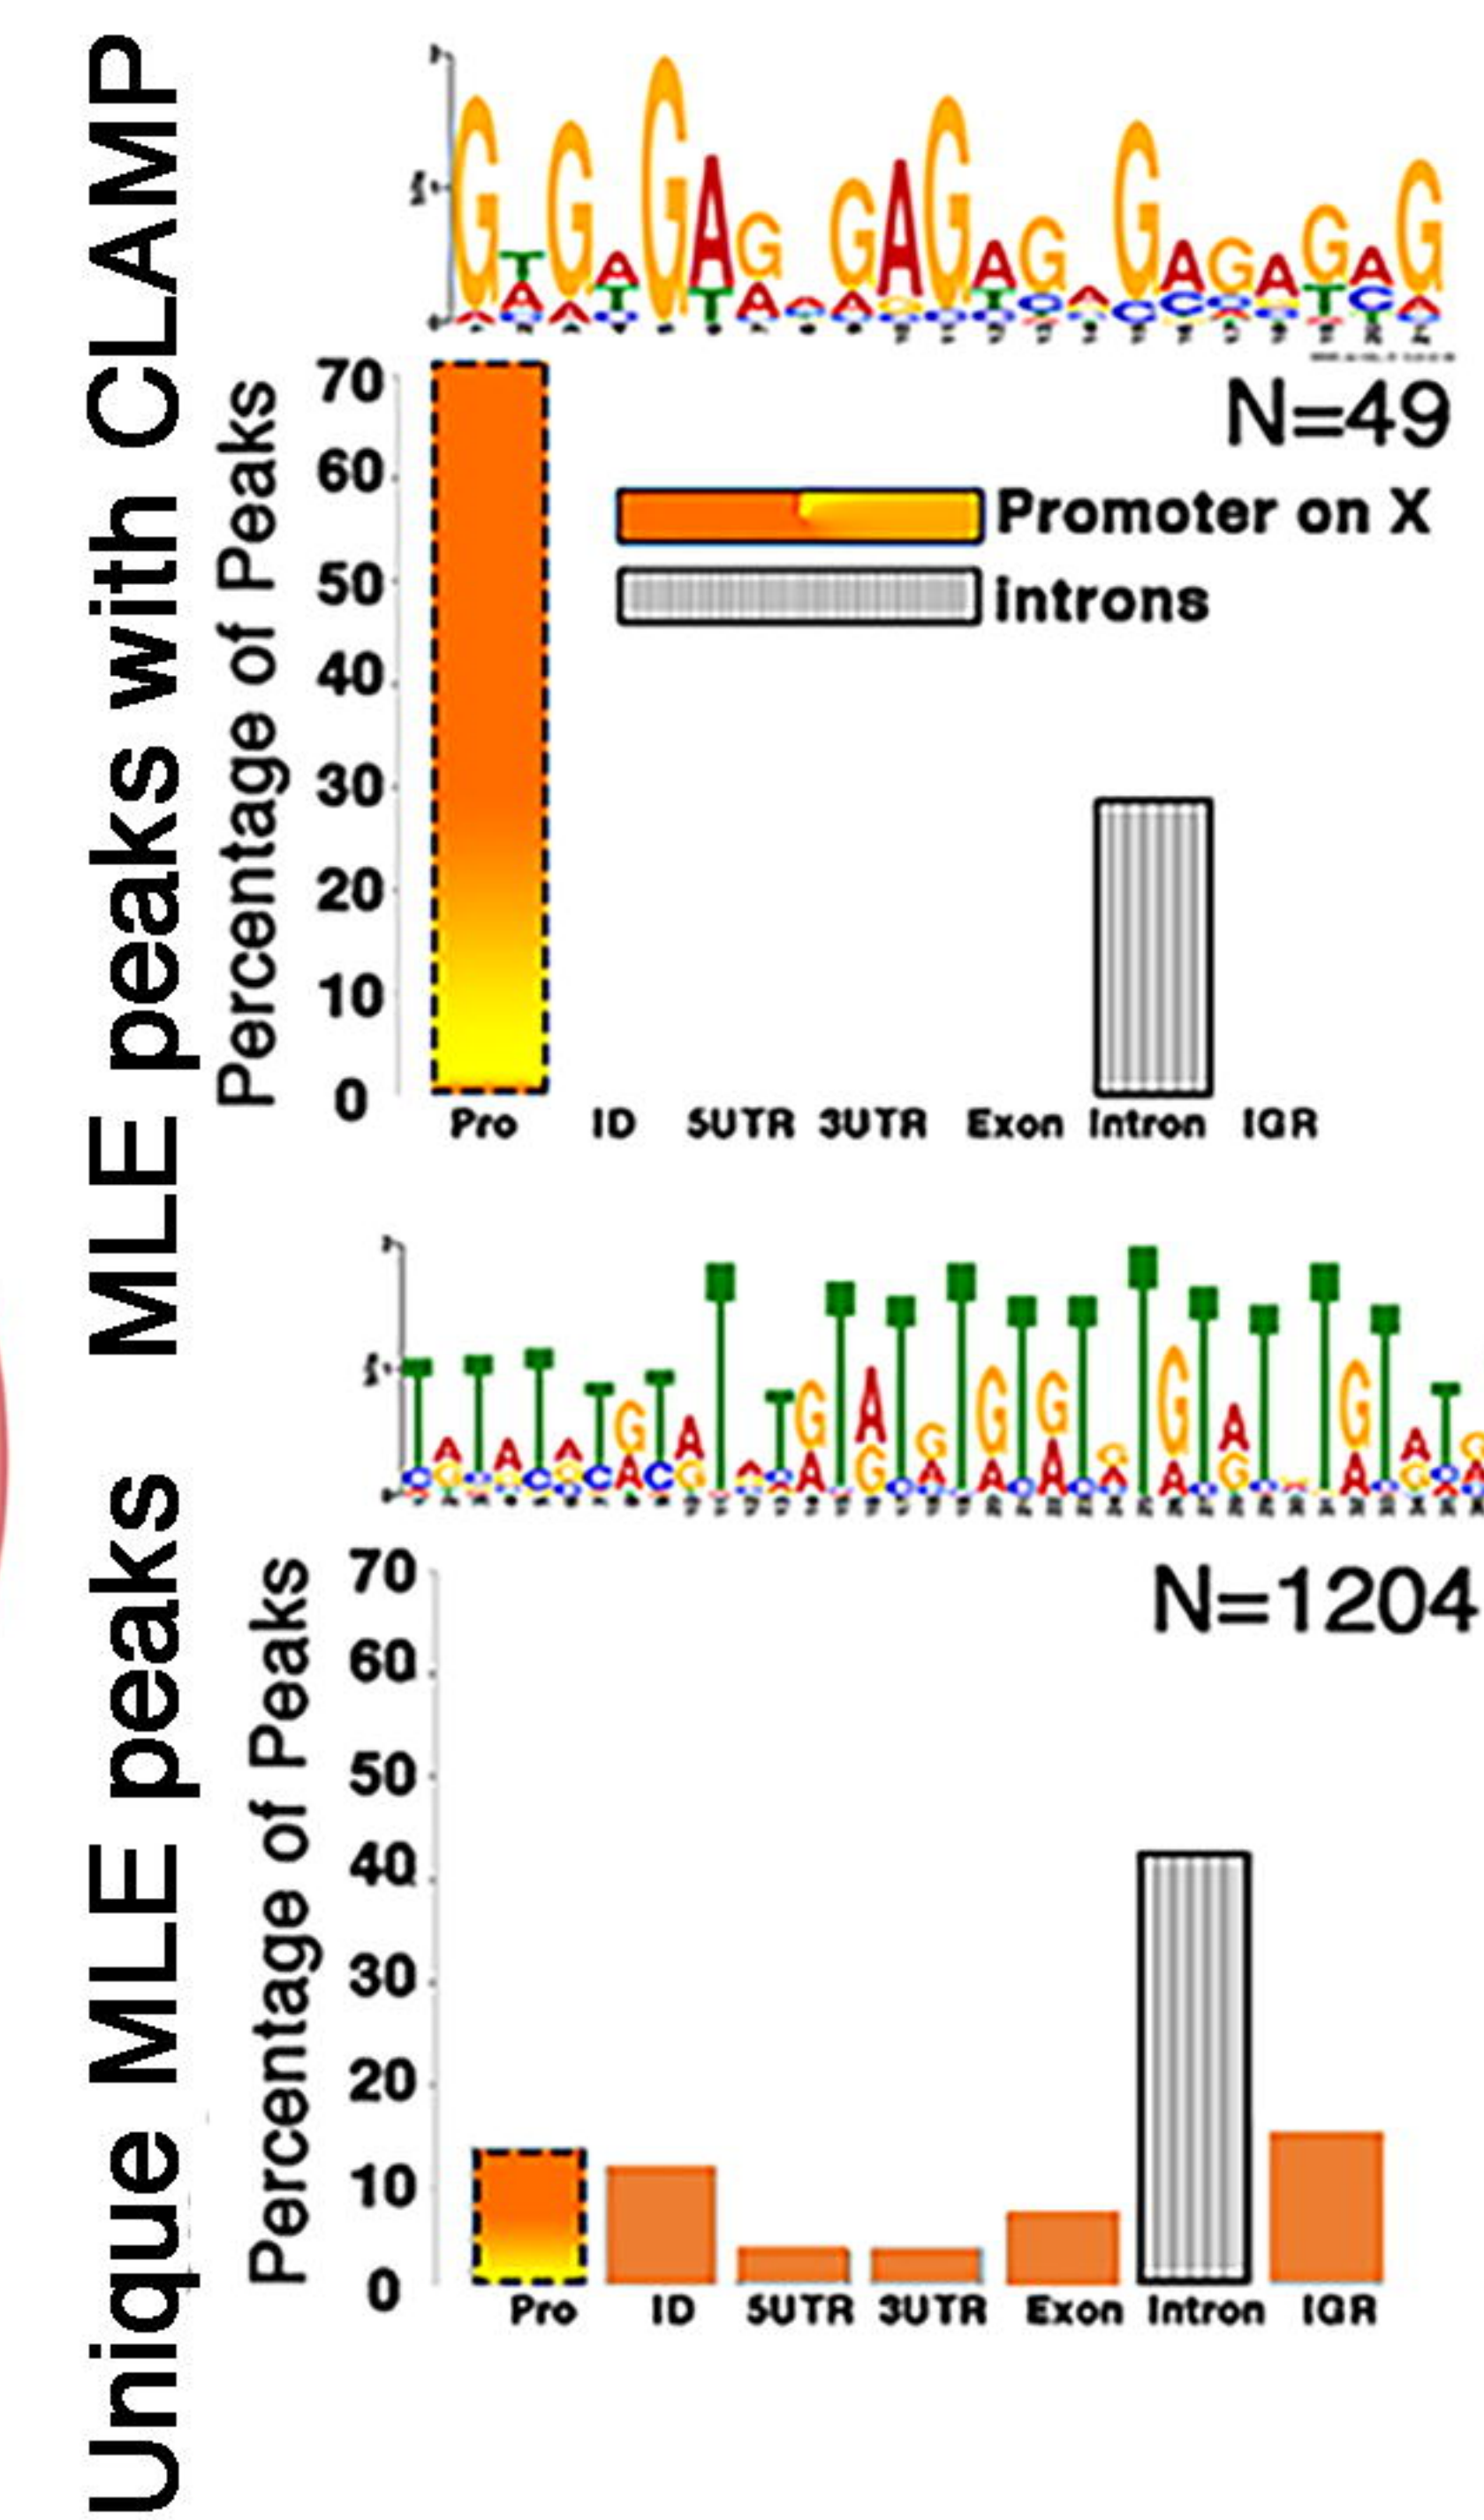

**B** *MTD-GAL4>UAS-GFPRNAi*

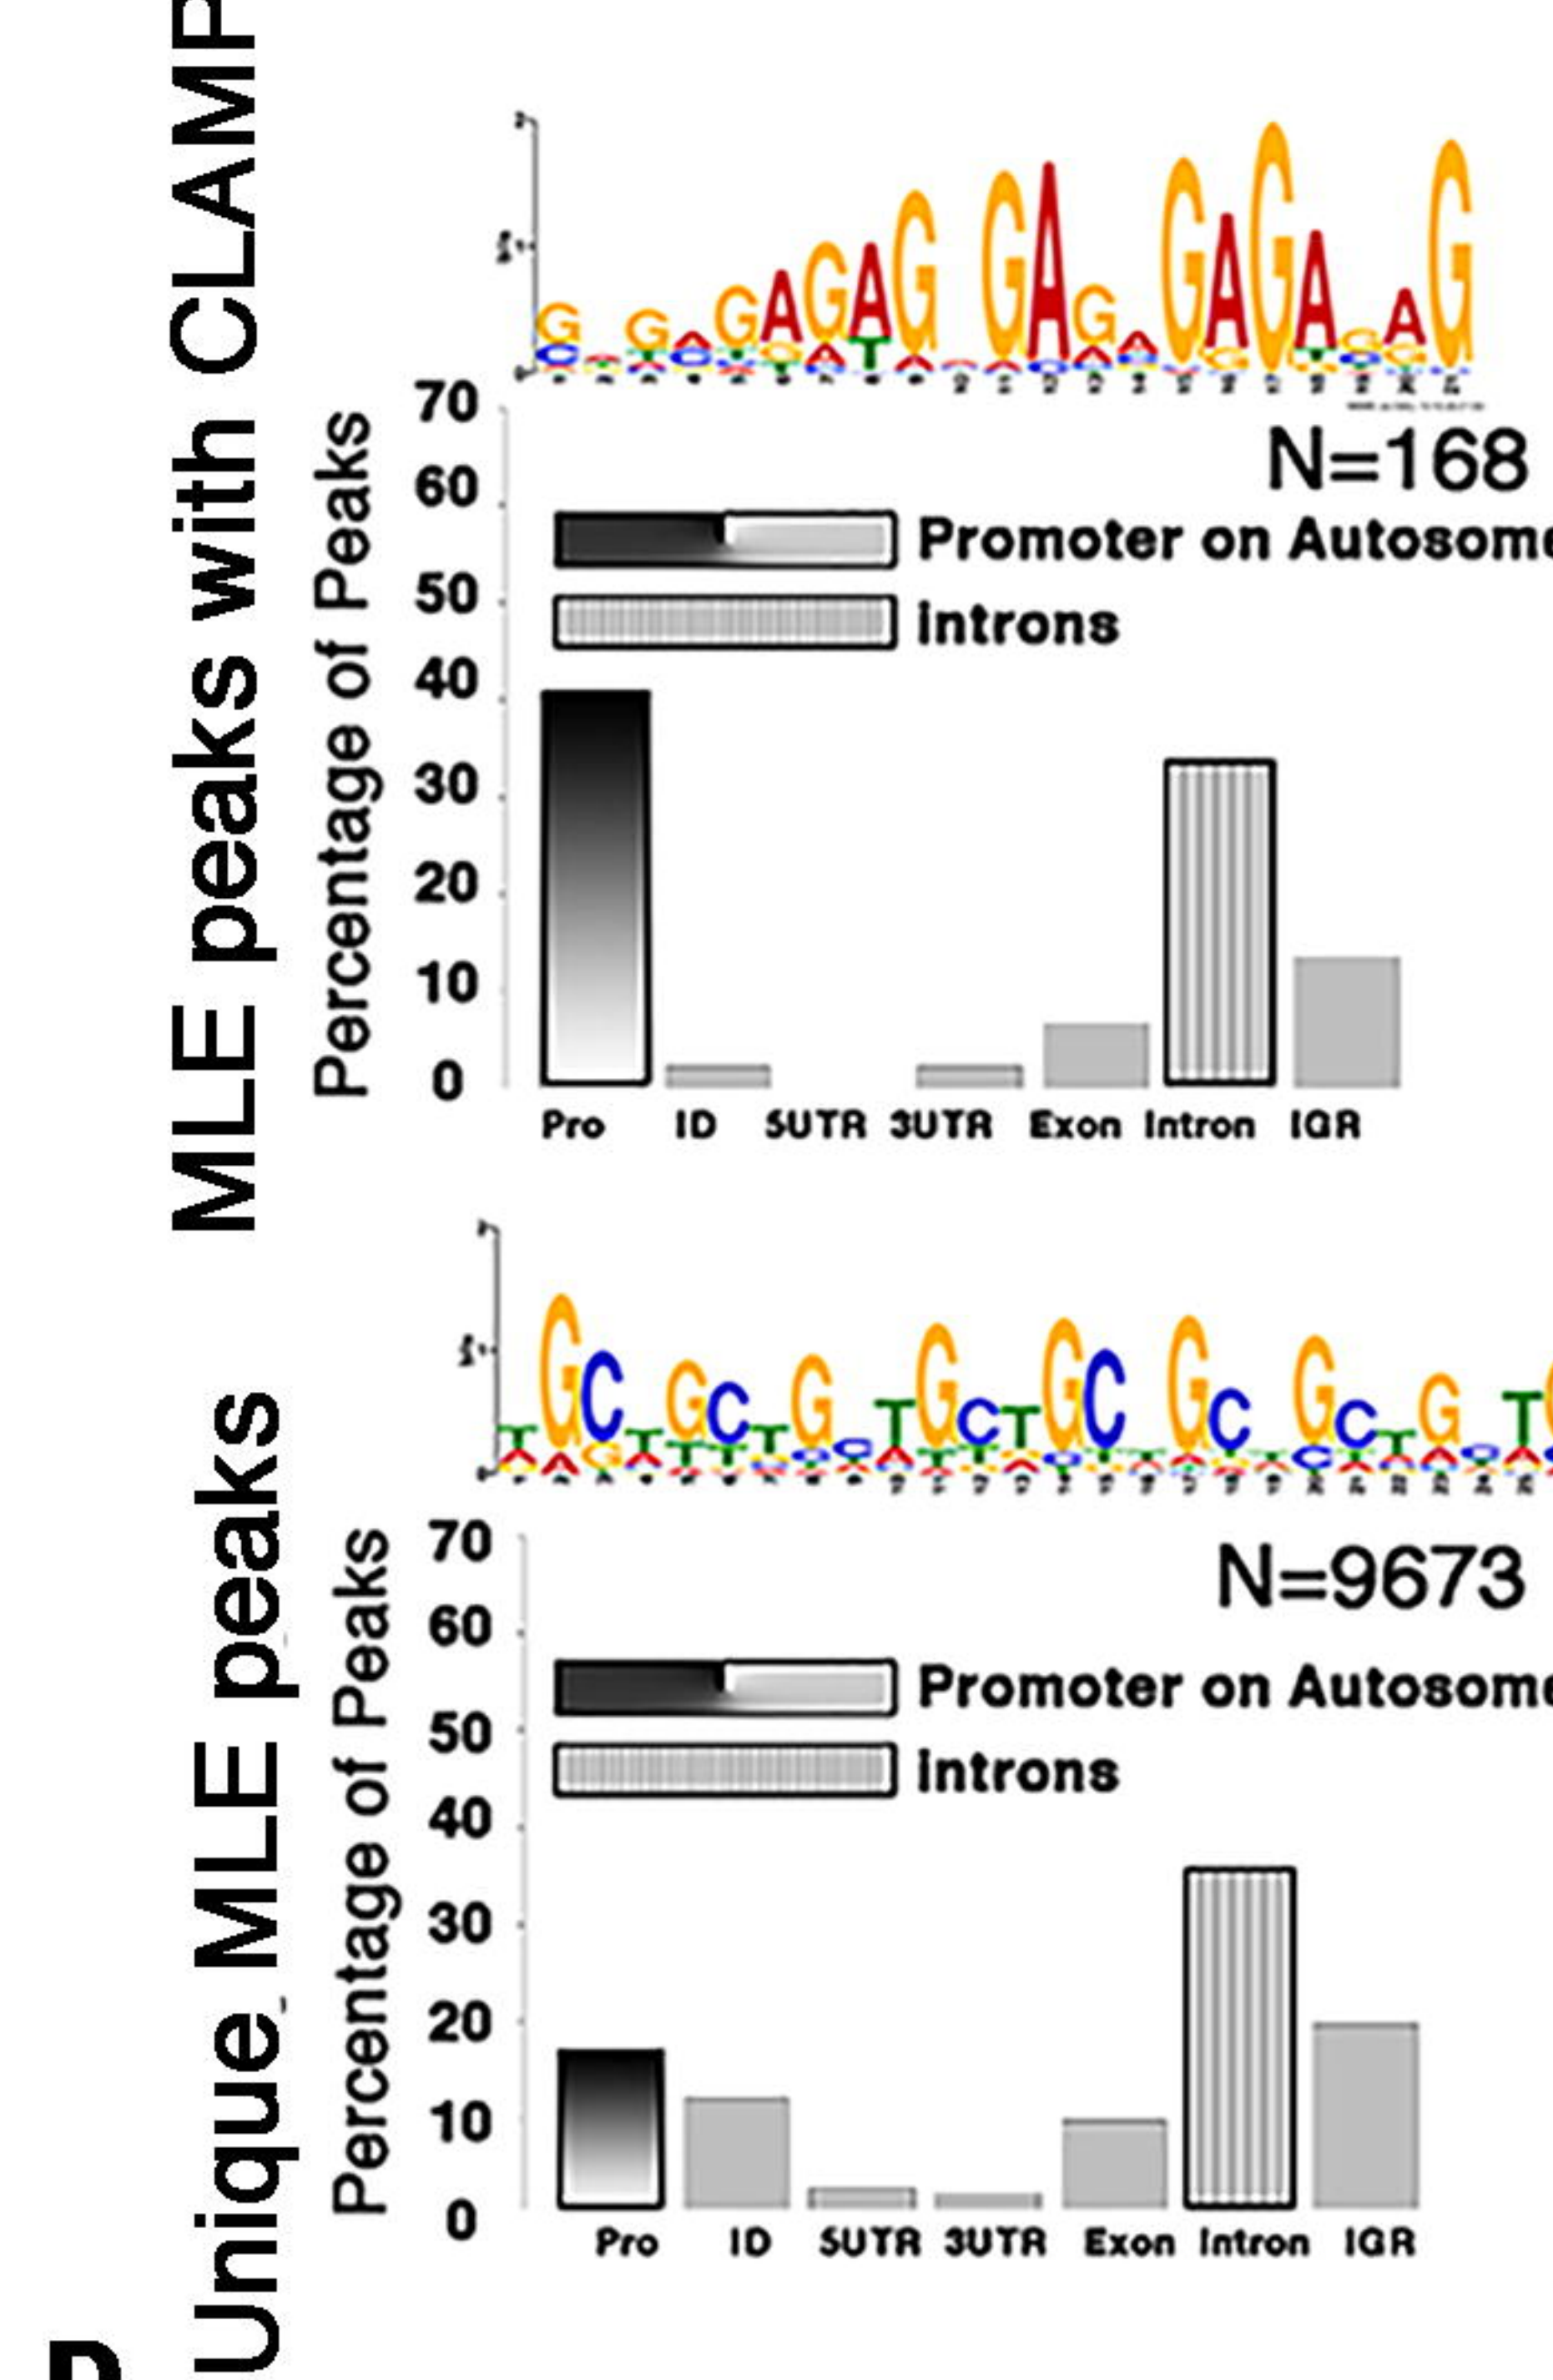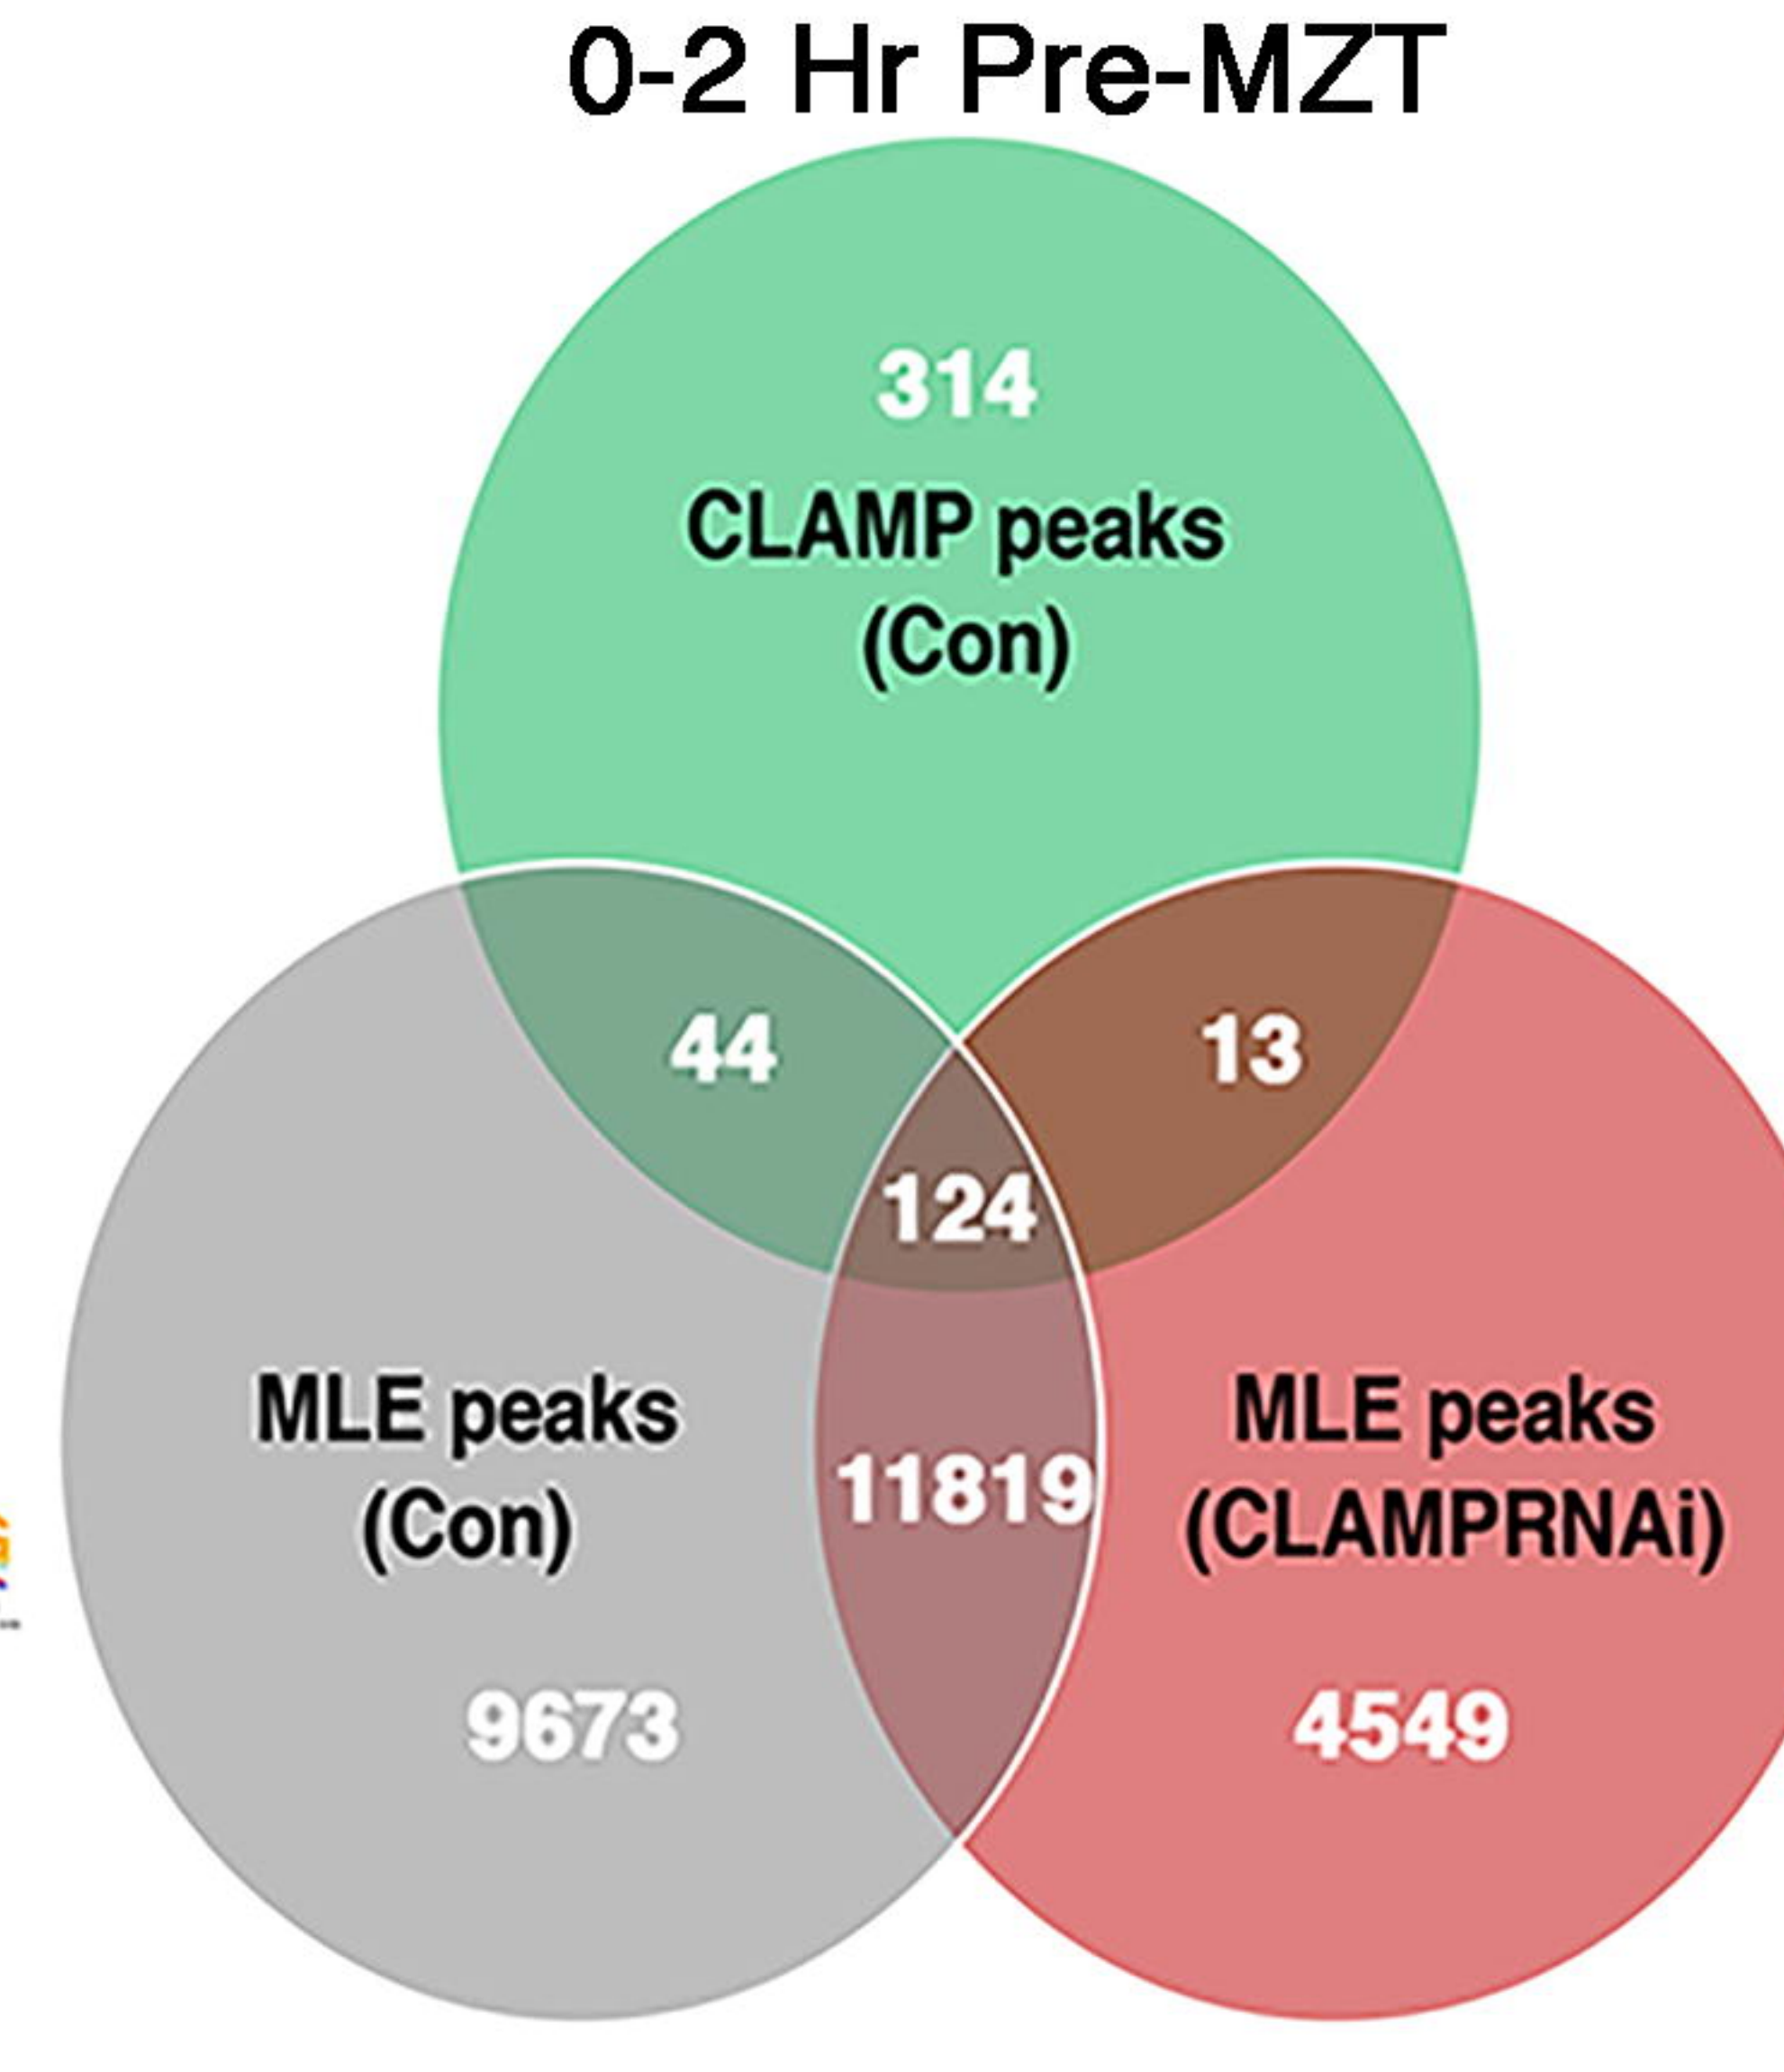

*MTD-GAL4>UAS-CLAMPRNAi*

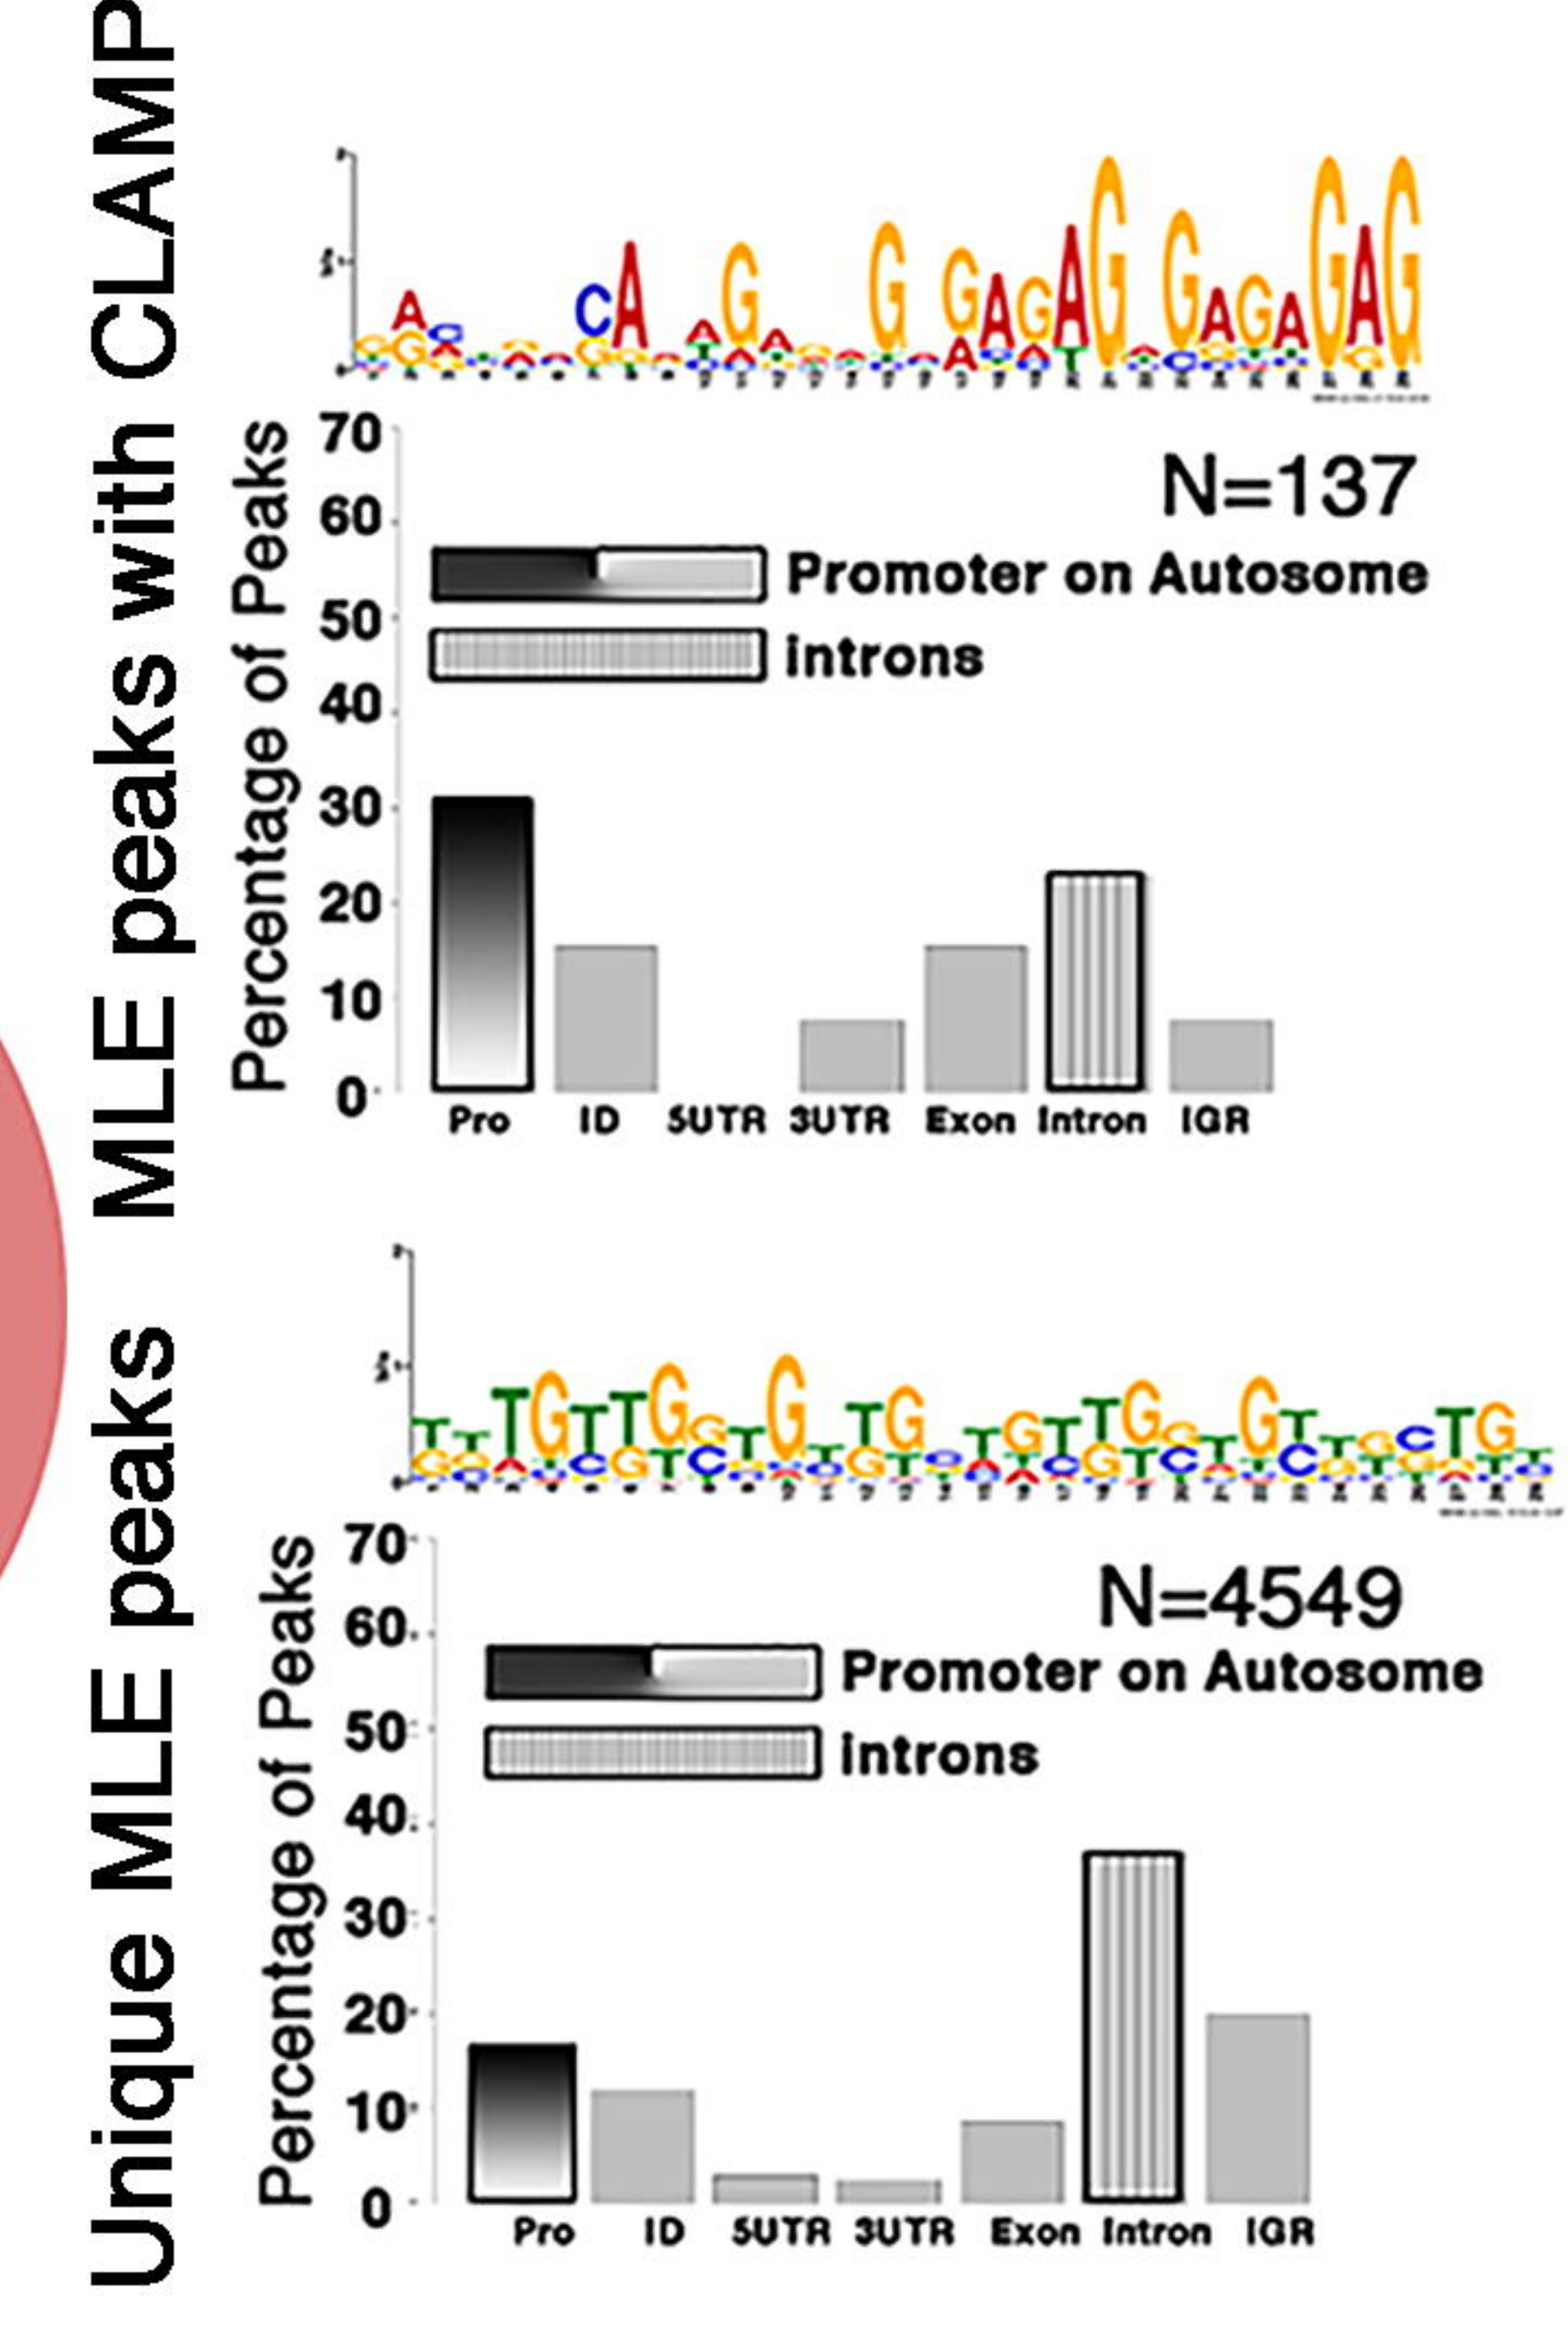

**C** *MTD-GAL4>UAS-GFPRNAi*

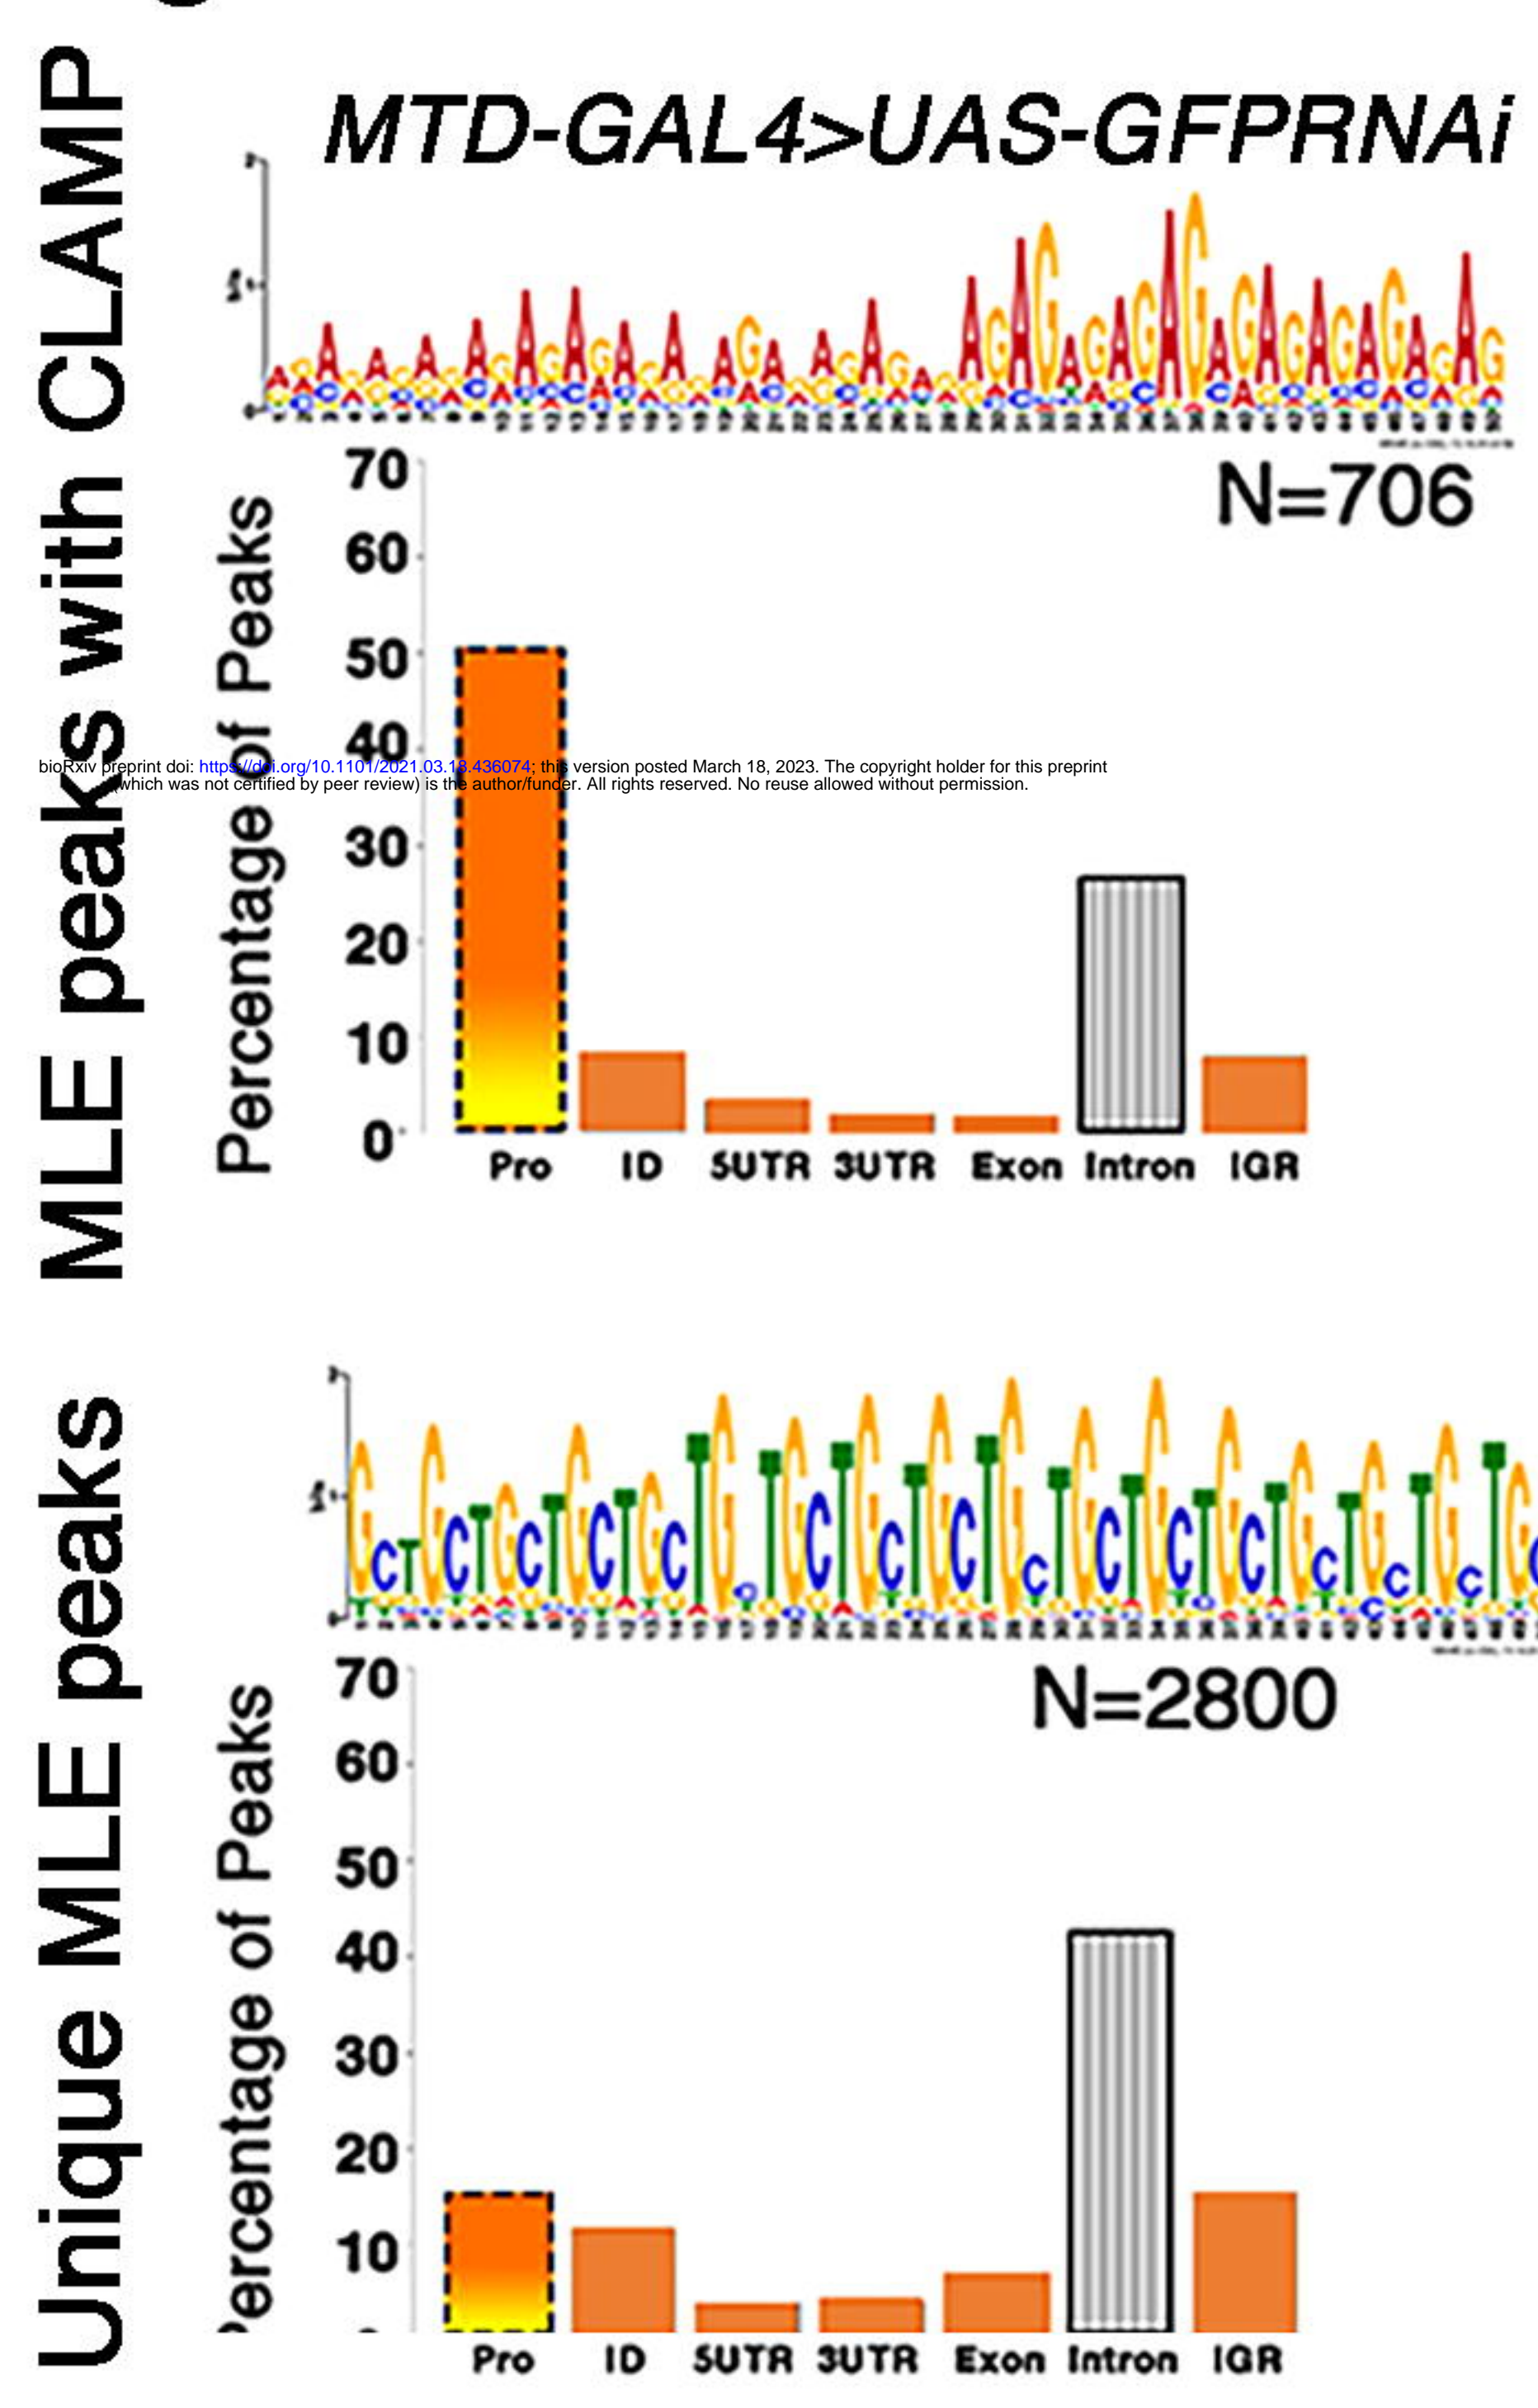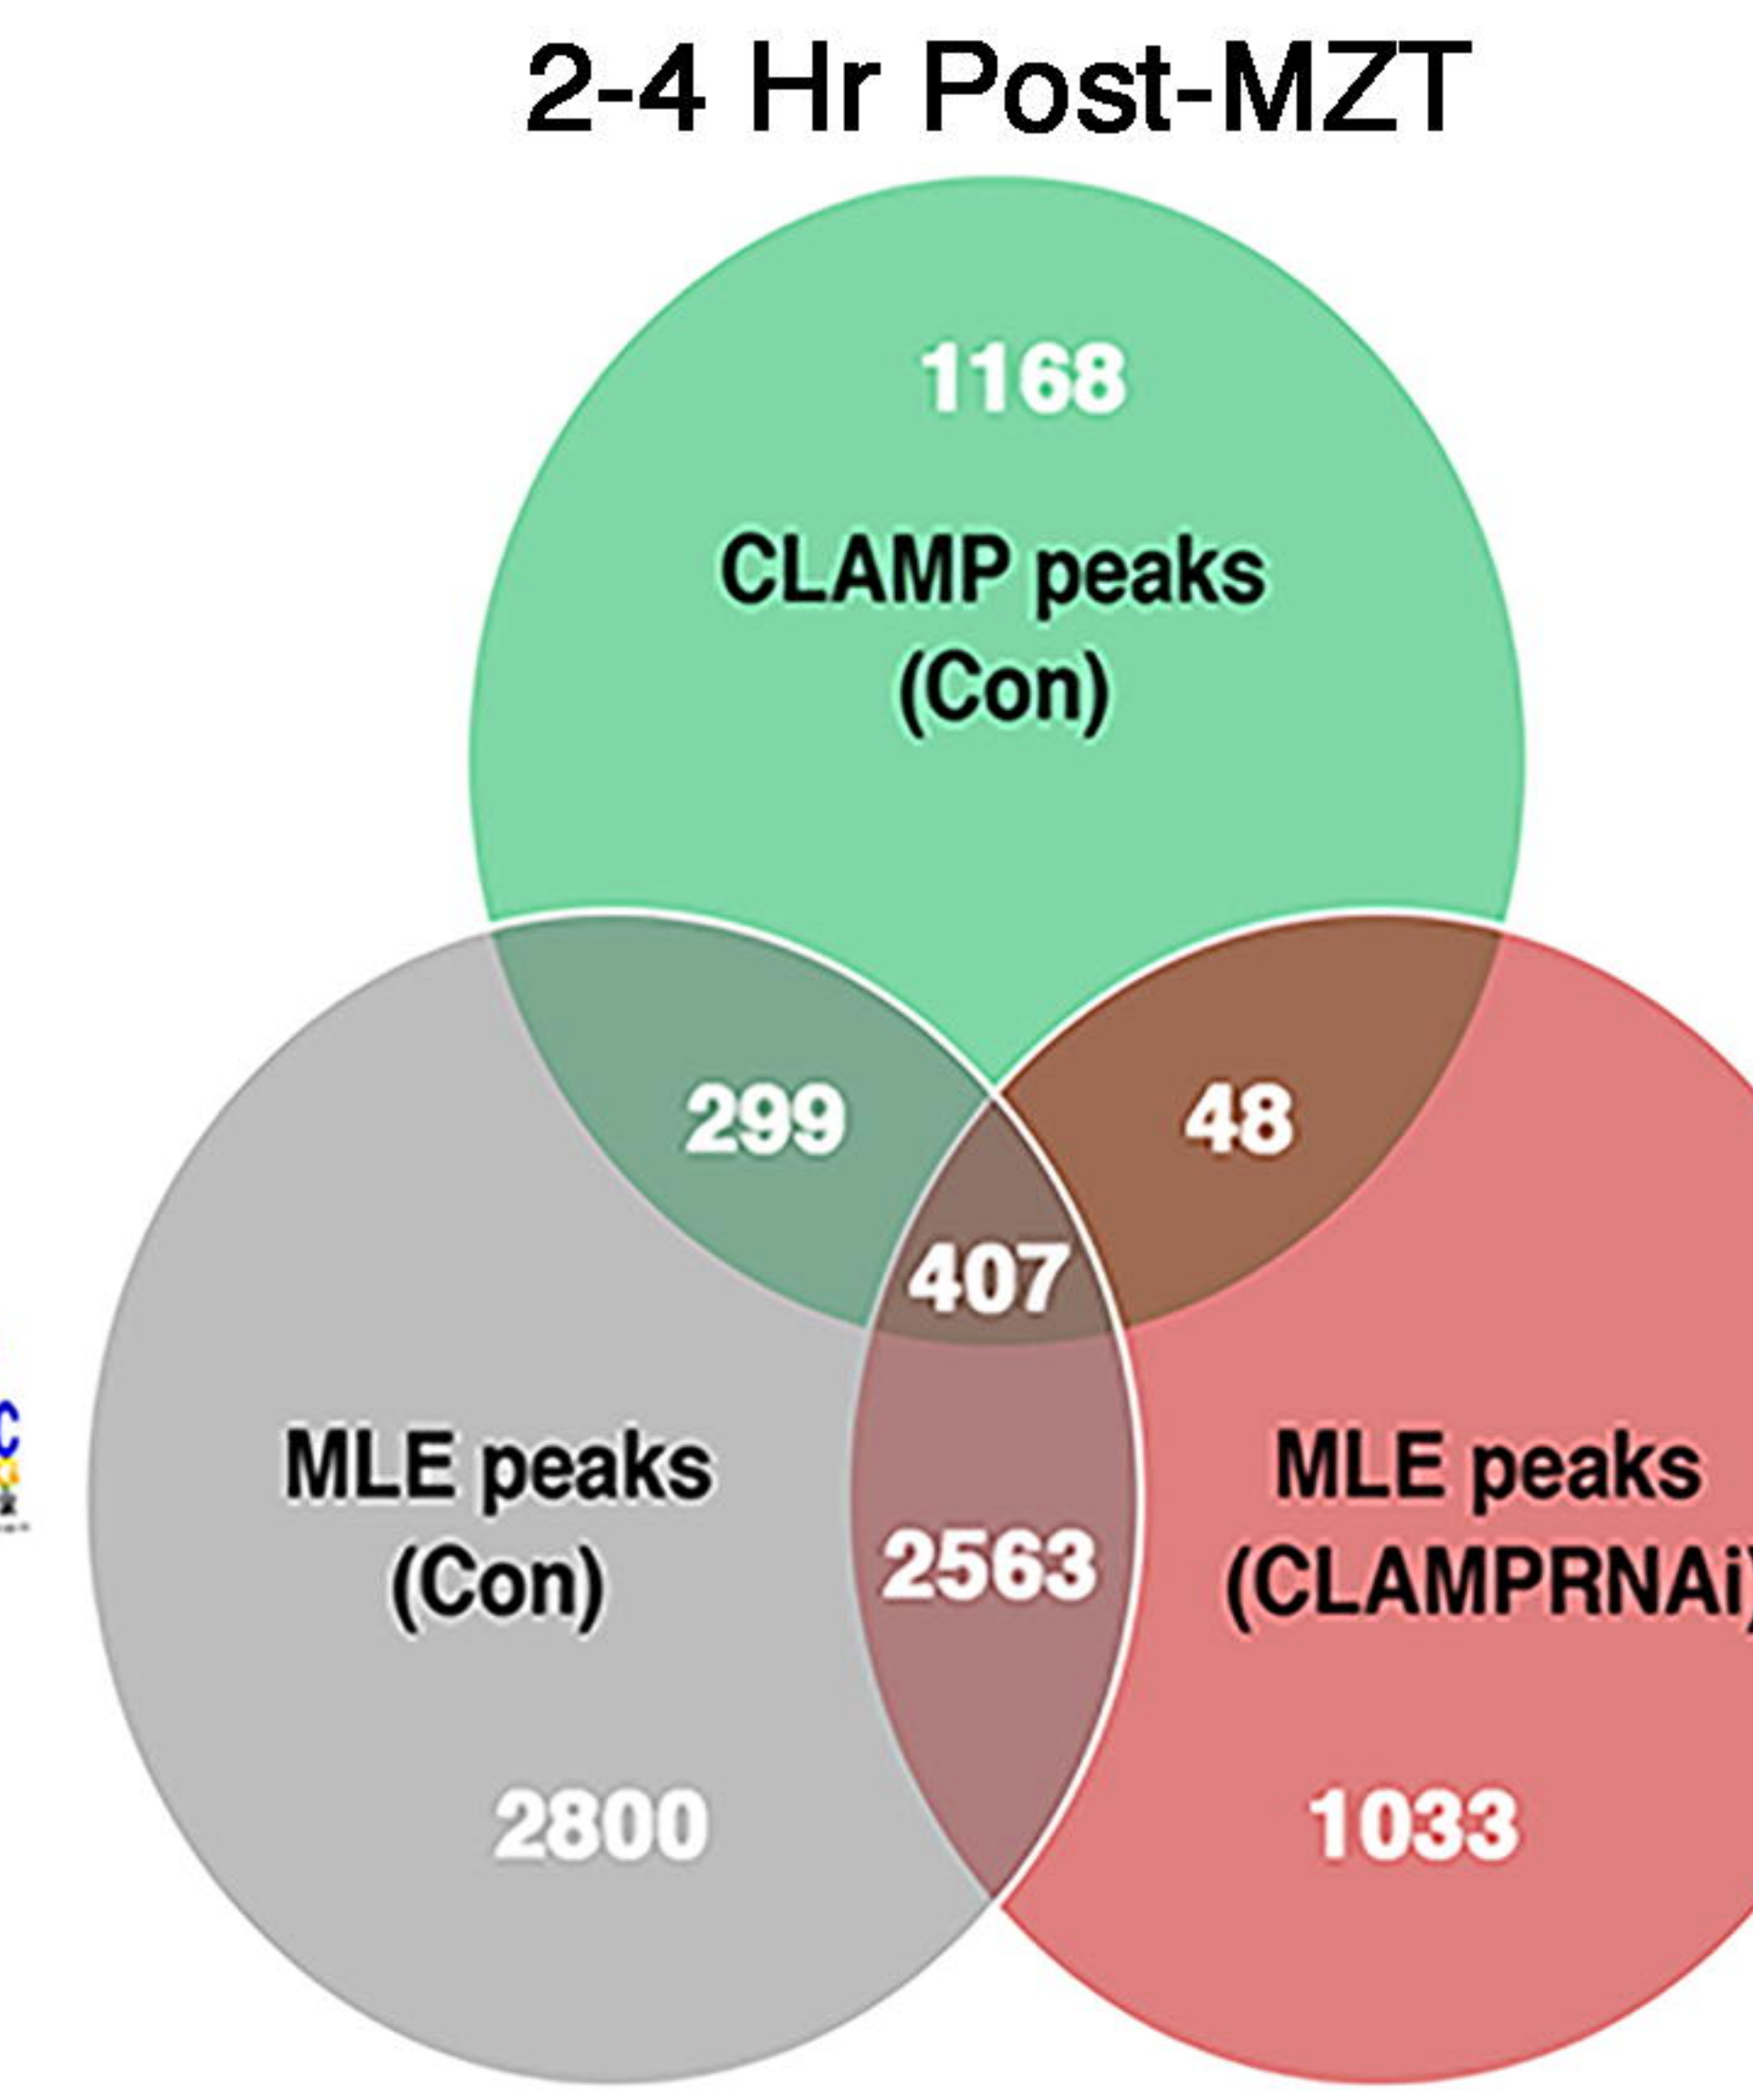

*MTD-GAL4>UAS-CLAMPRNAi*

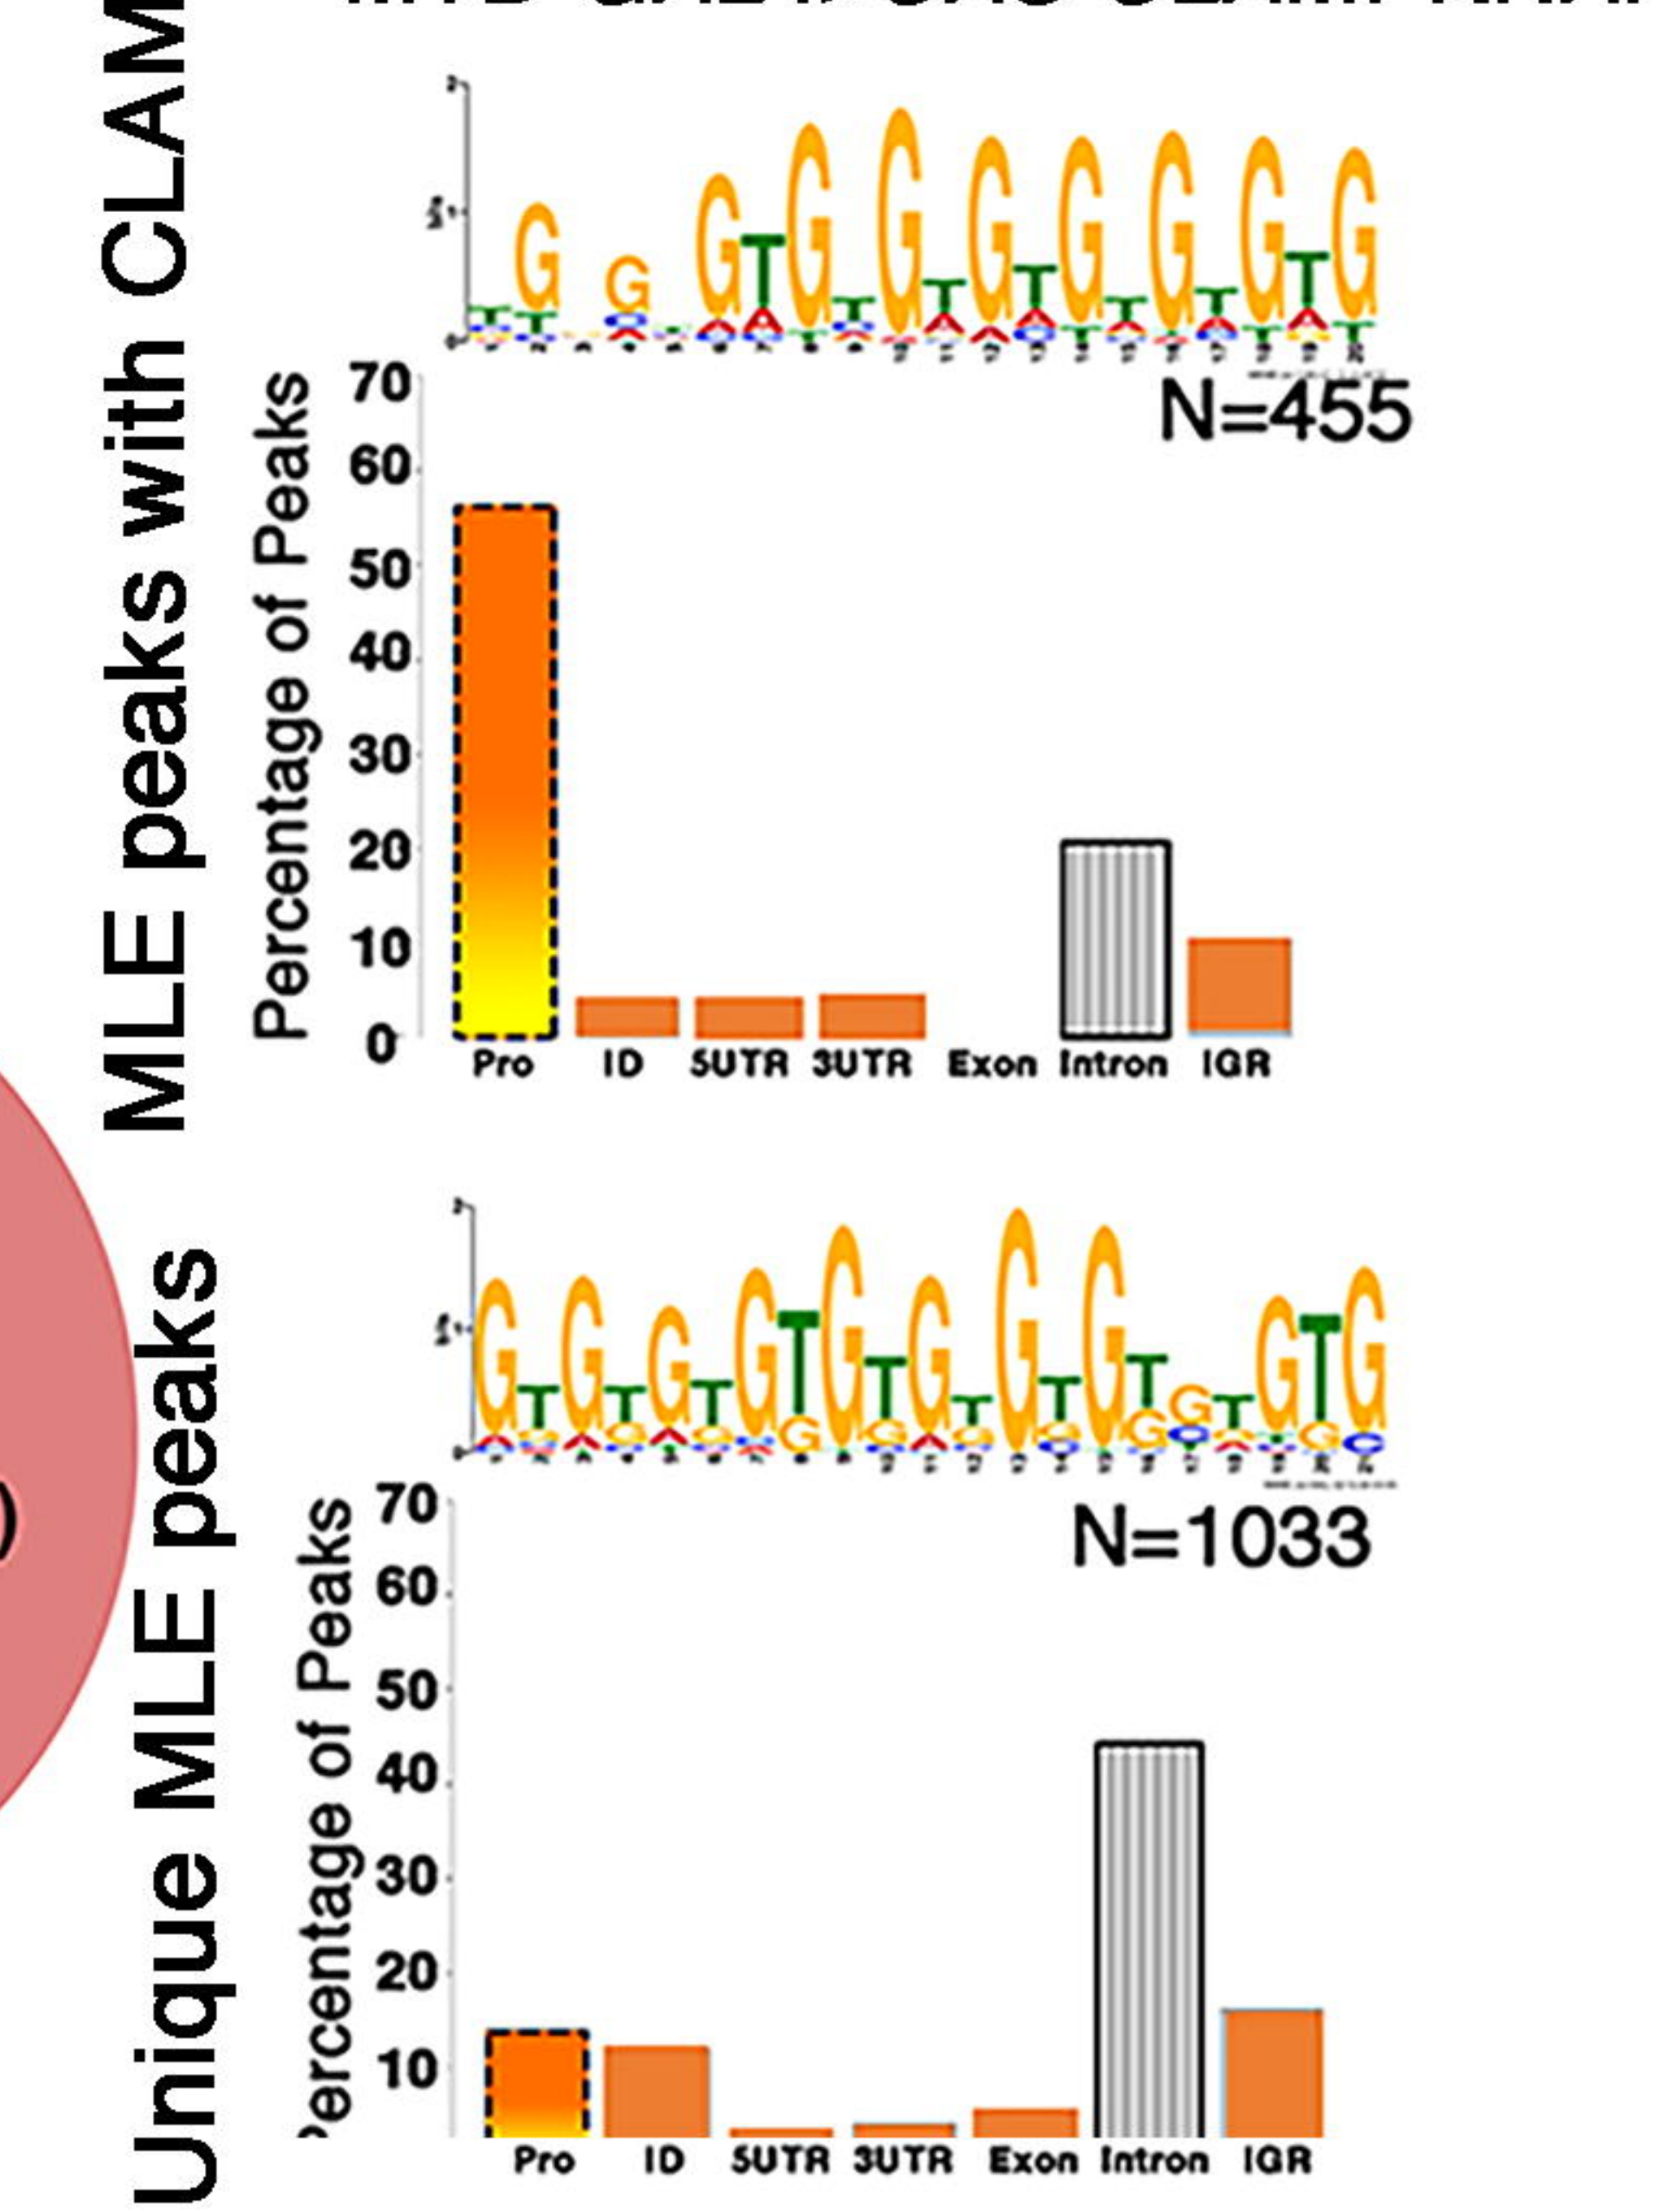

**D** *MTD-GAL4>UAS-GFPRNAi*

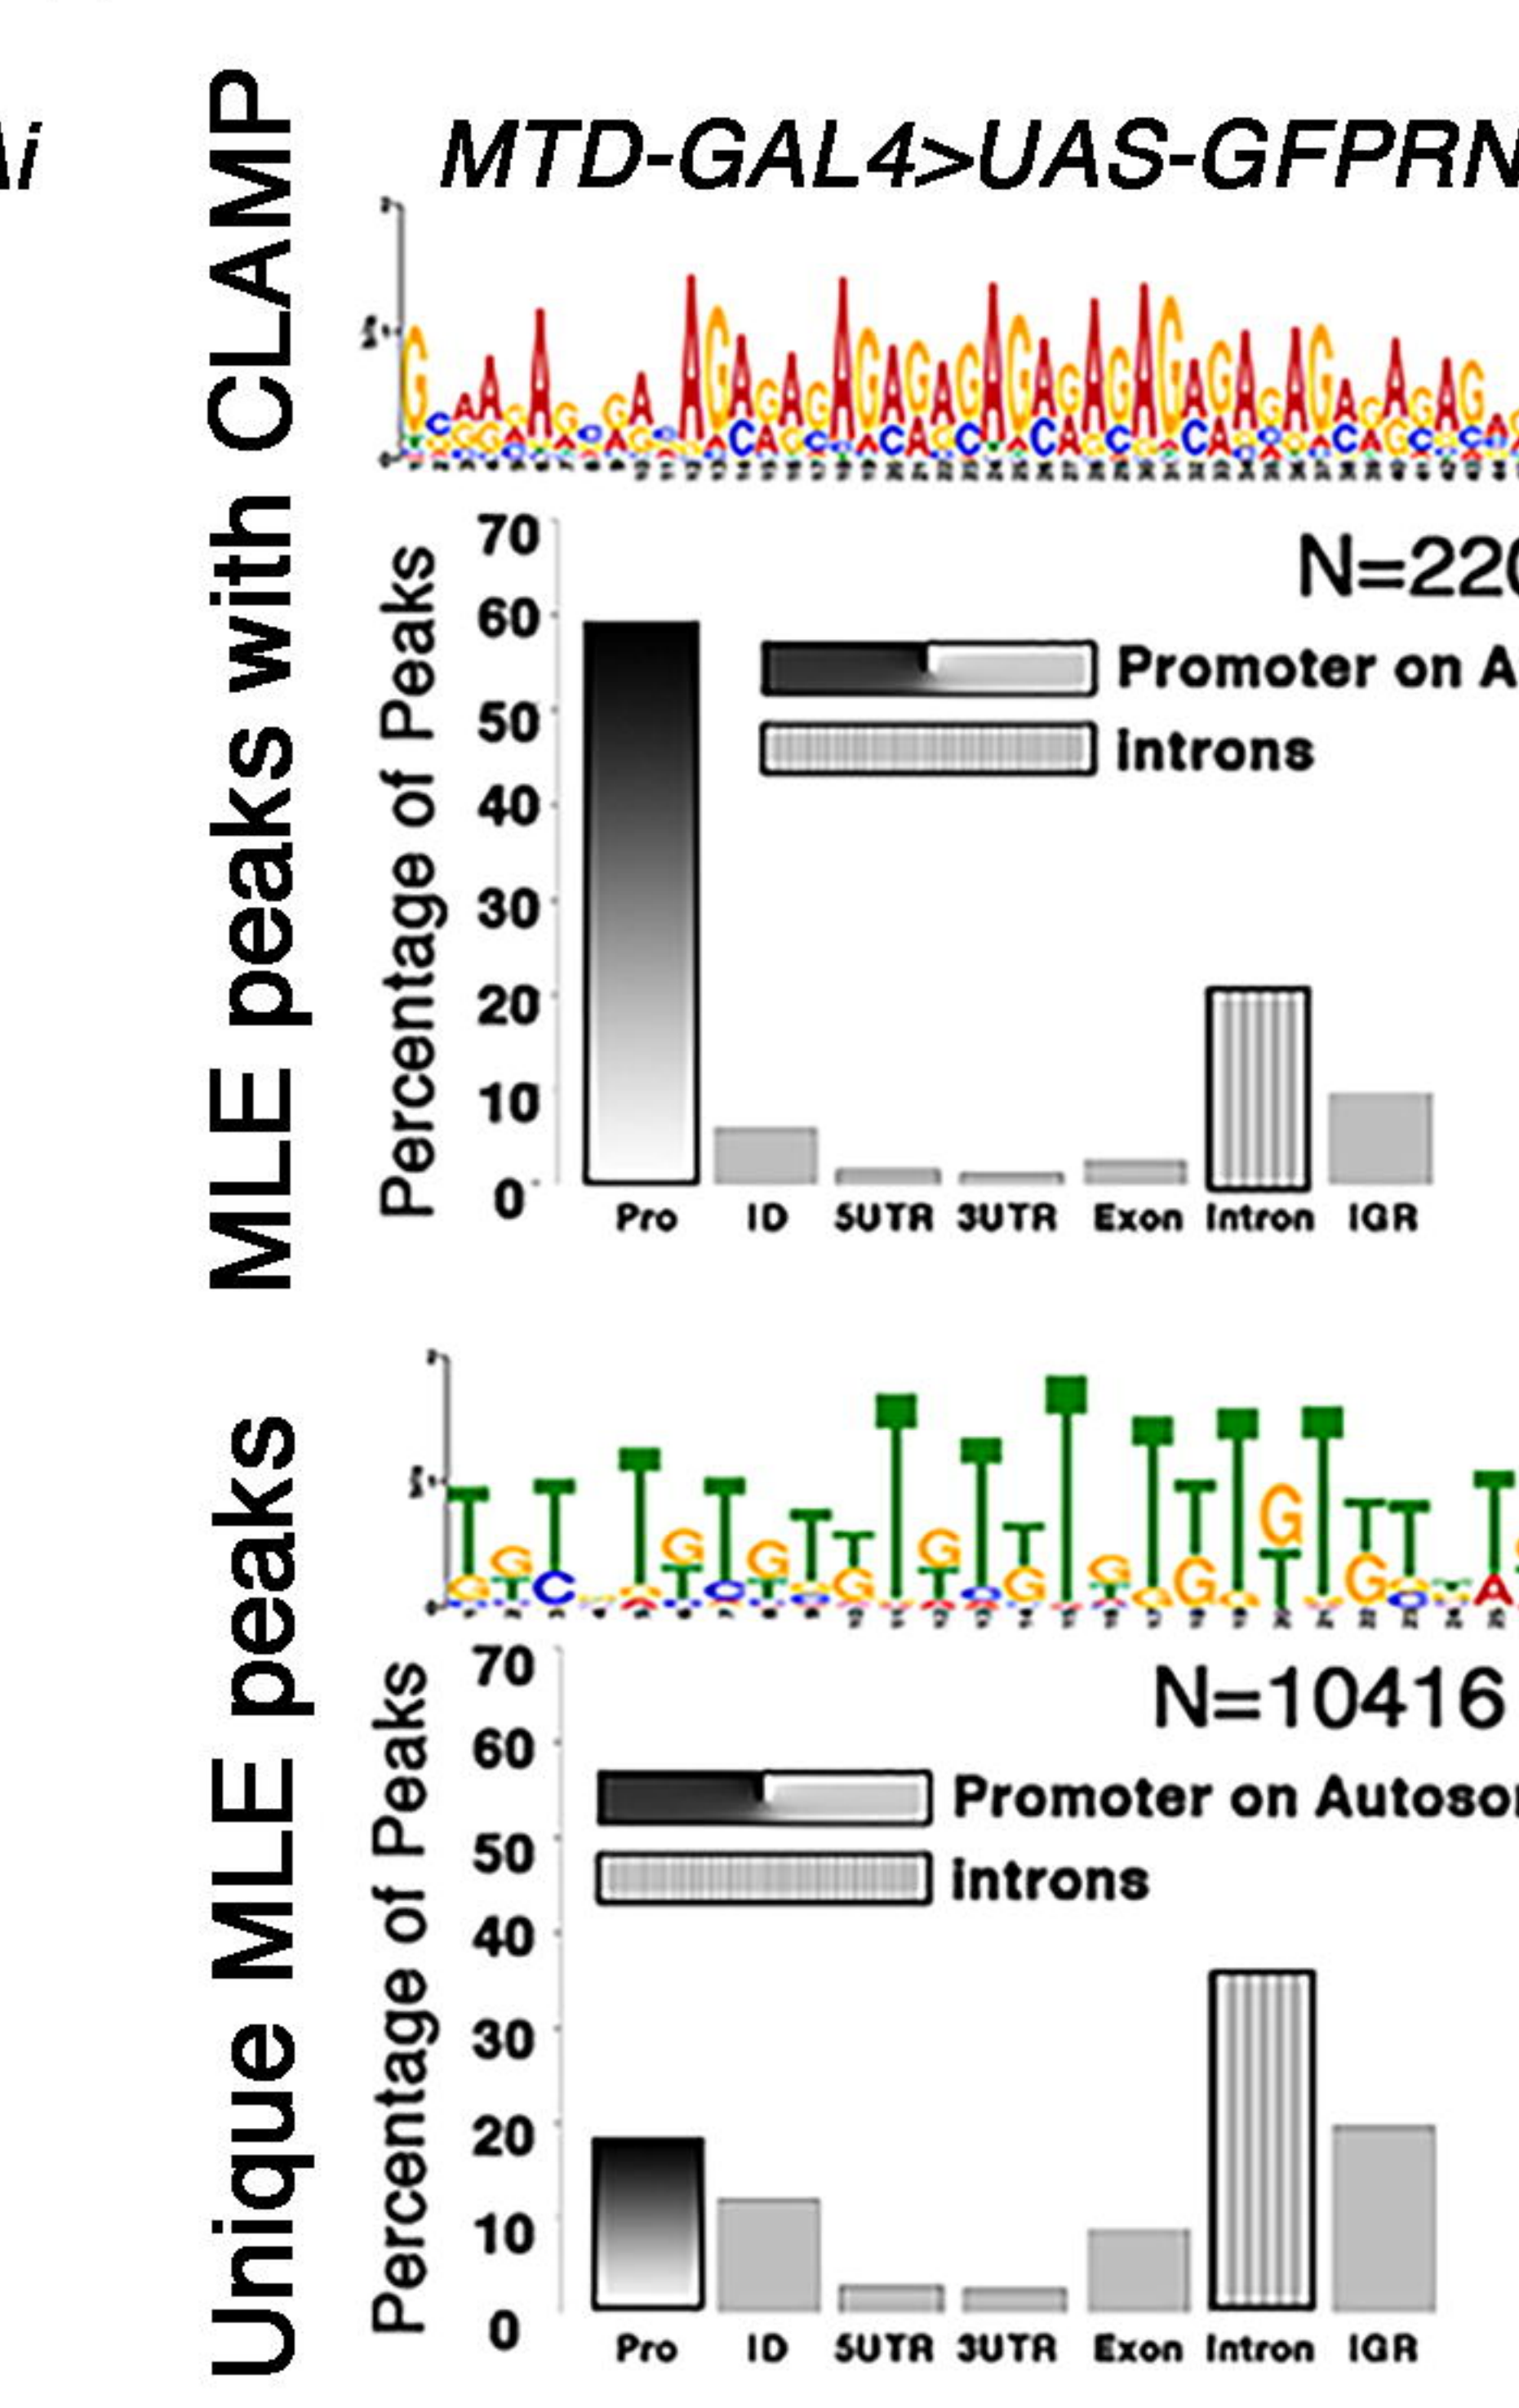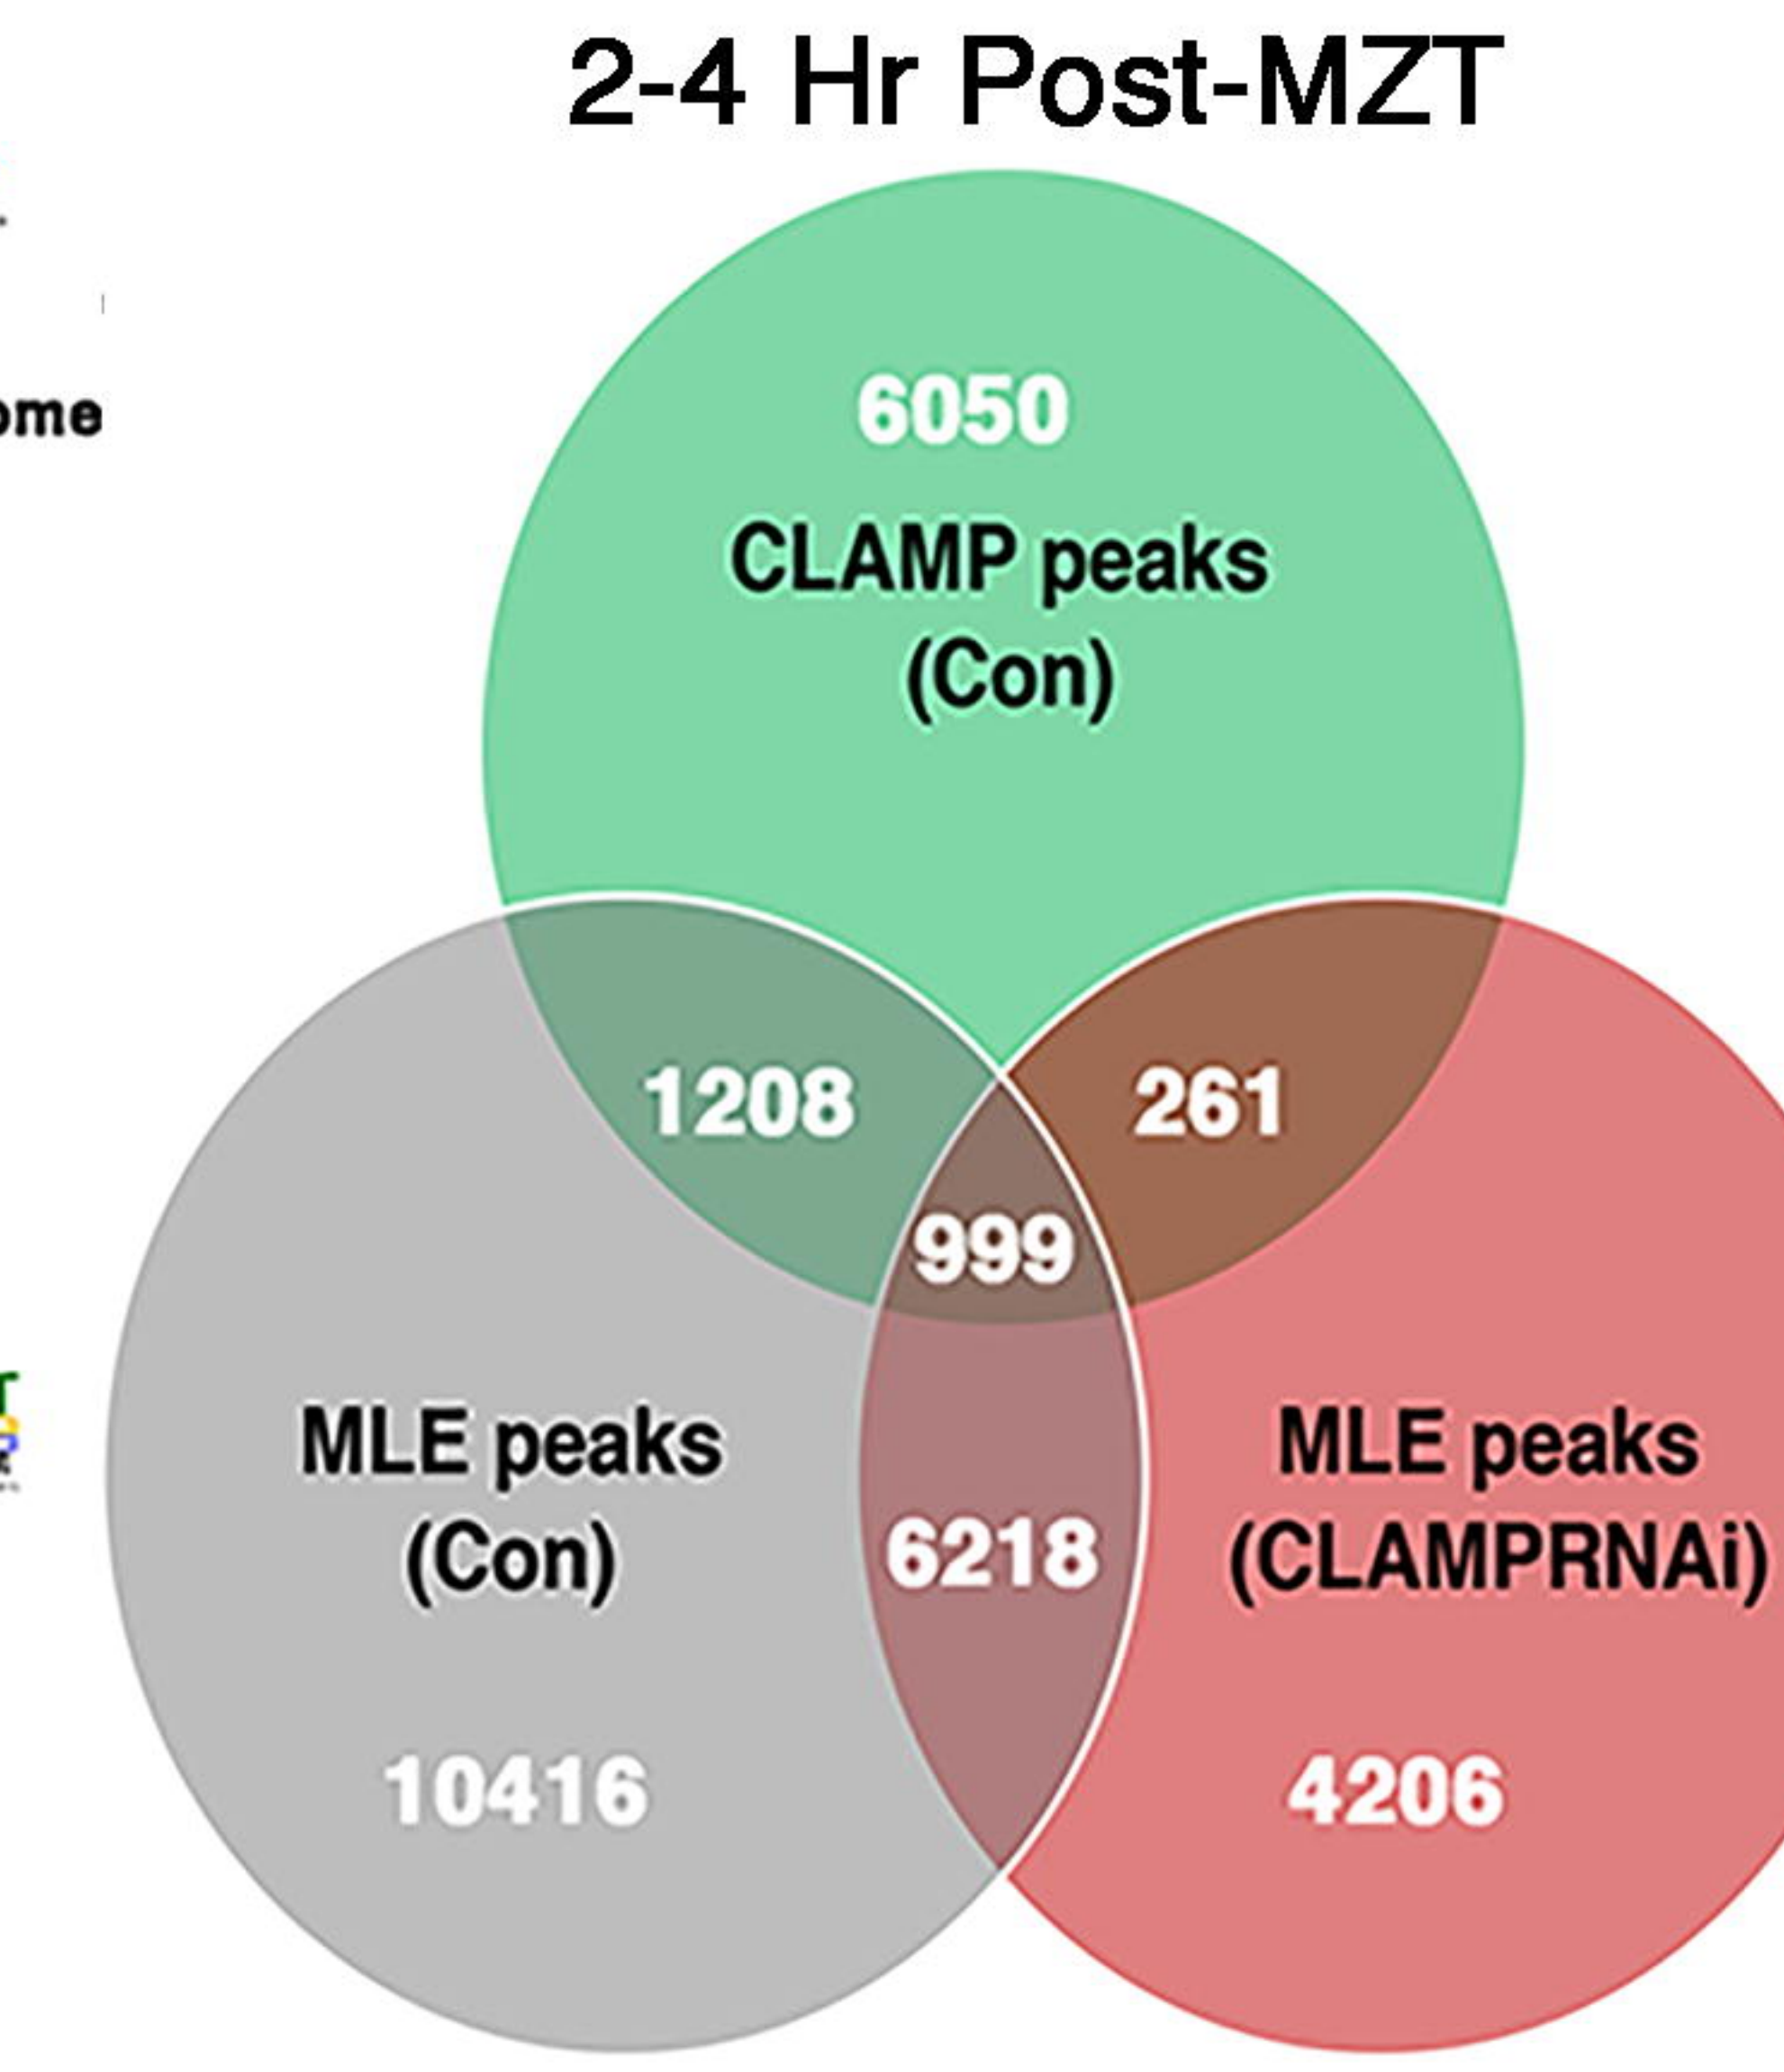

*MTD-GAL4>UAS-CLAMPRNAi*

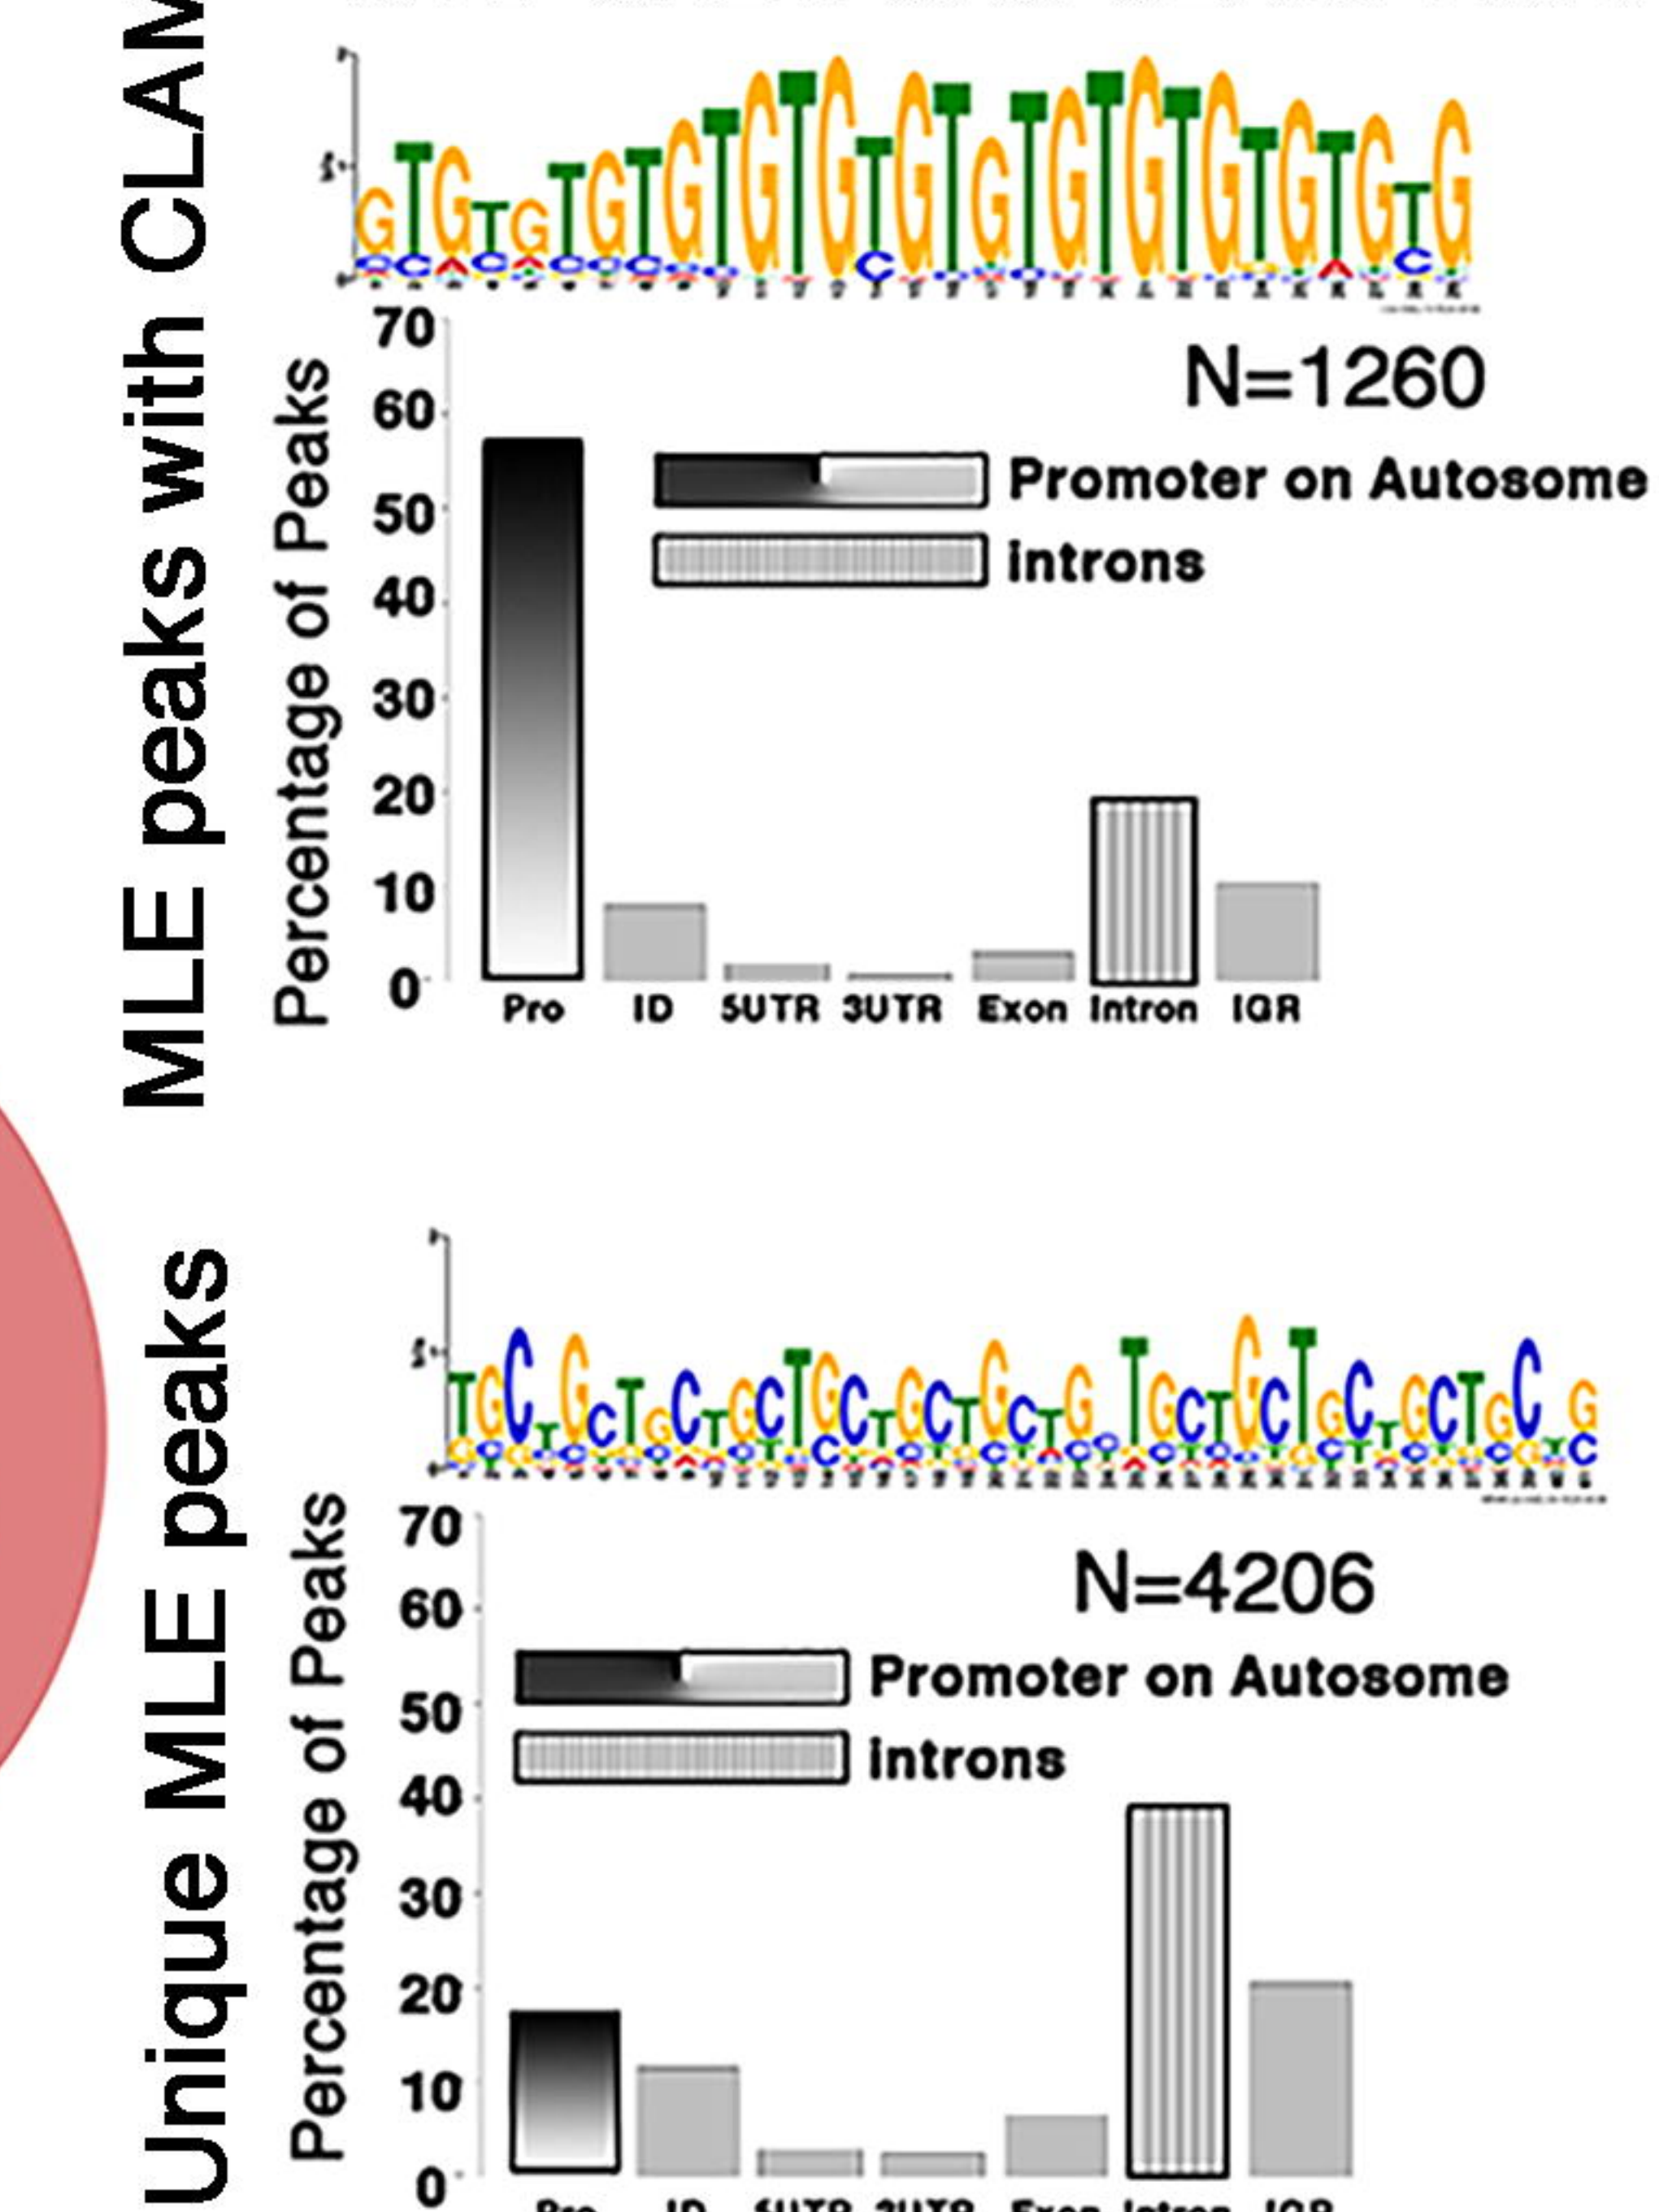

— CLAMP-dependent male-specific spliced gene  
— CLAMP-dependent female-specific spliced gene  
— Random actively expressing gene

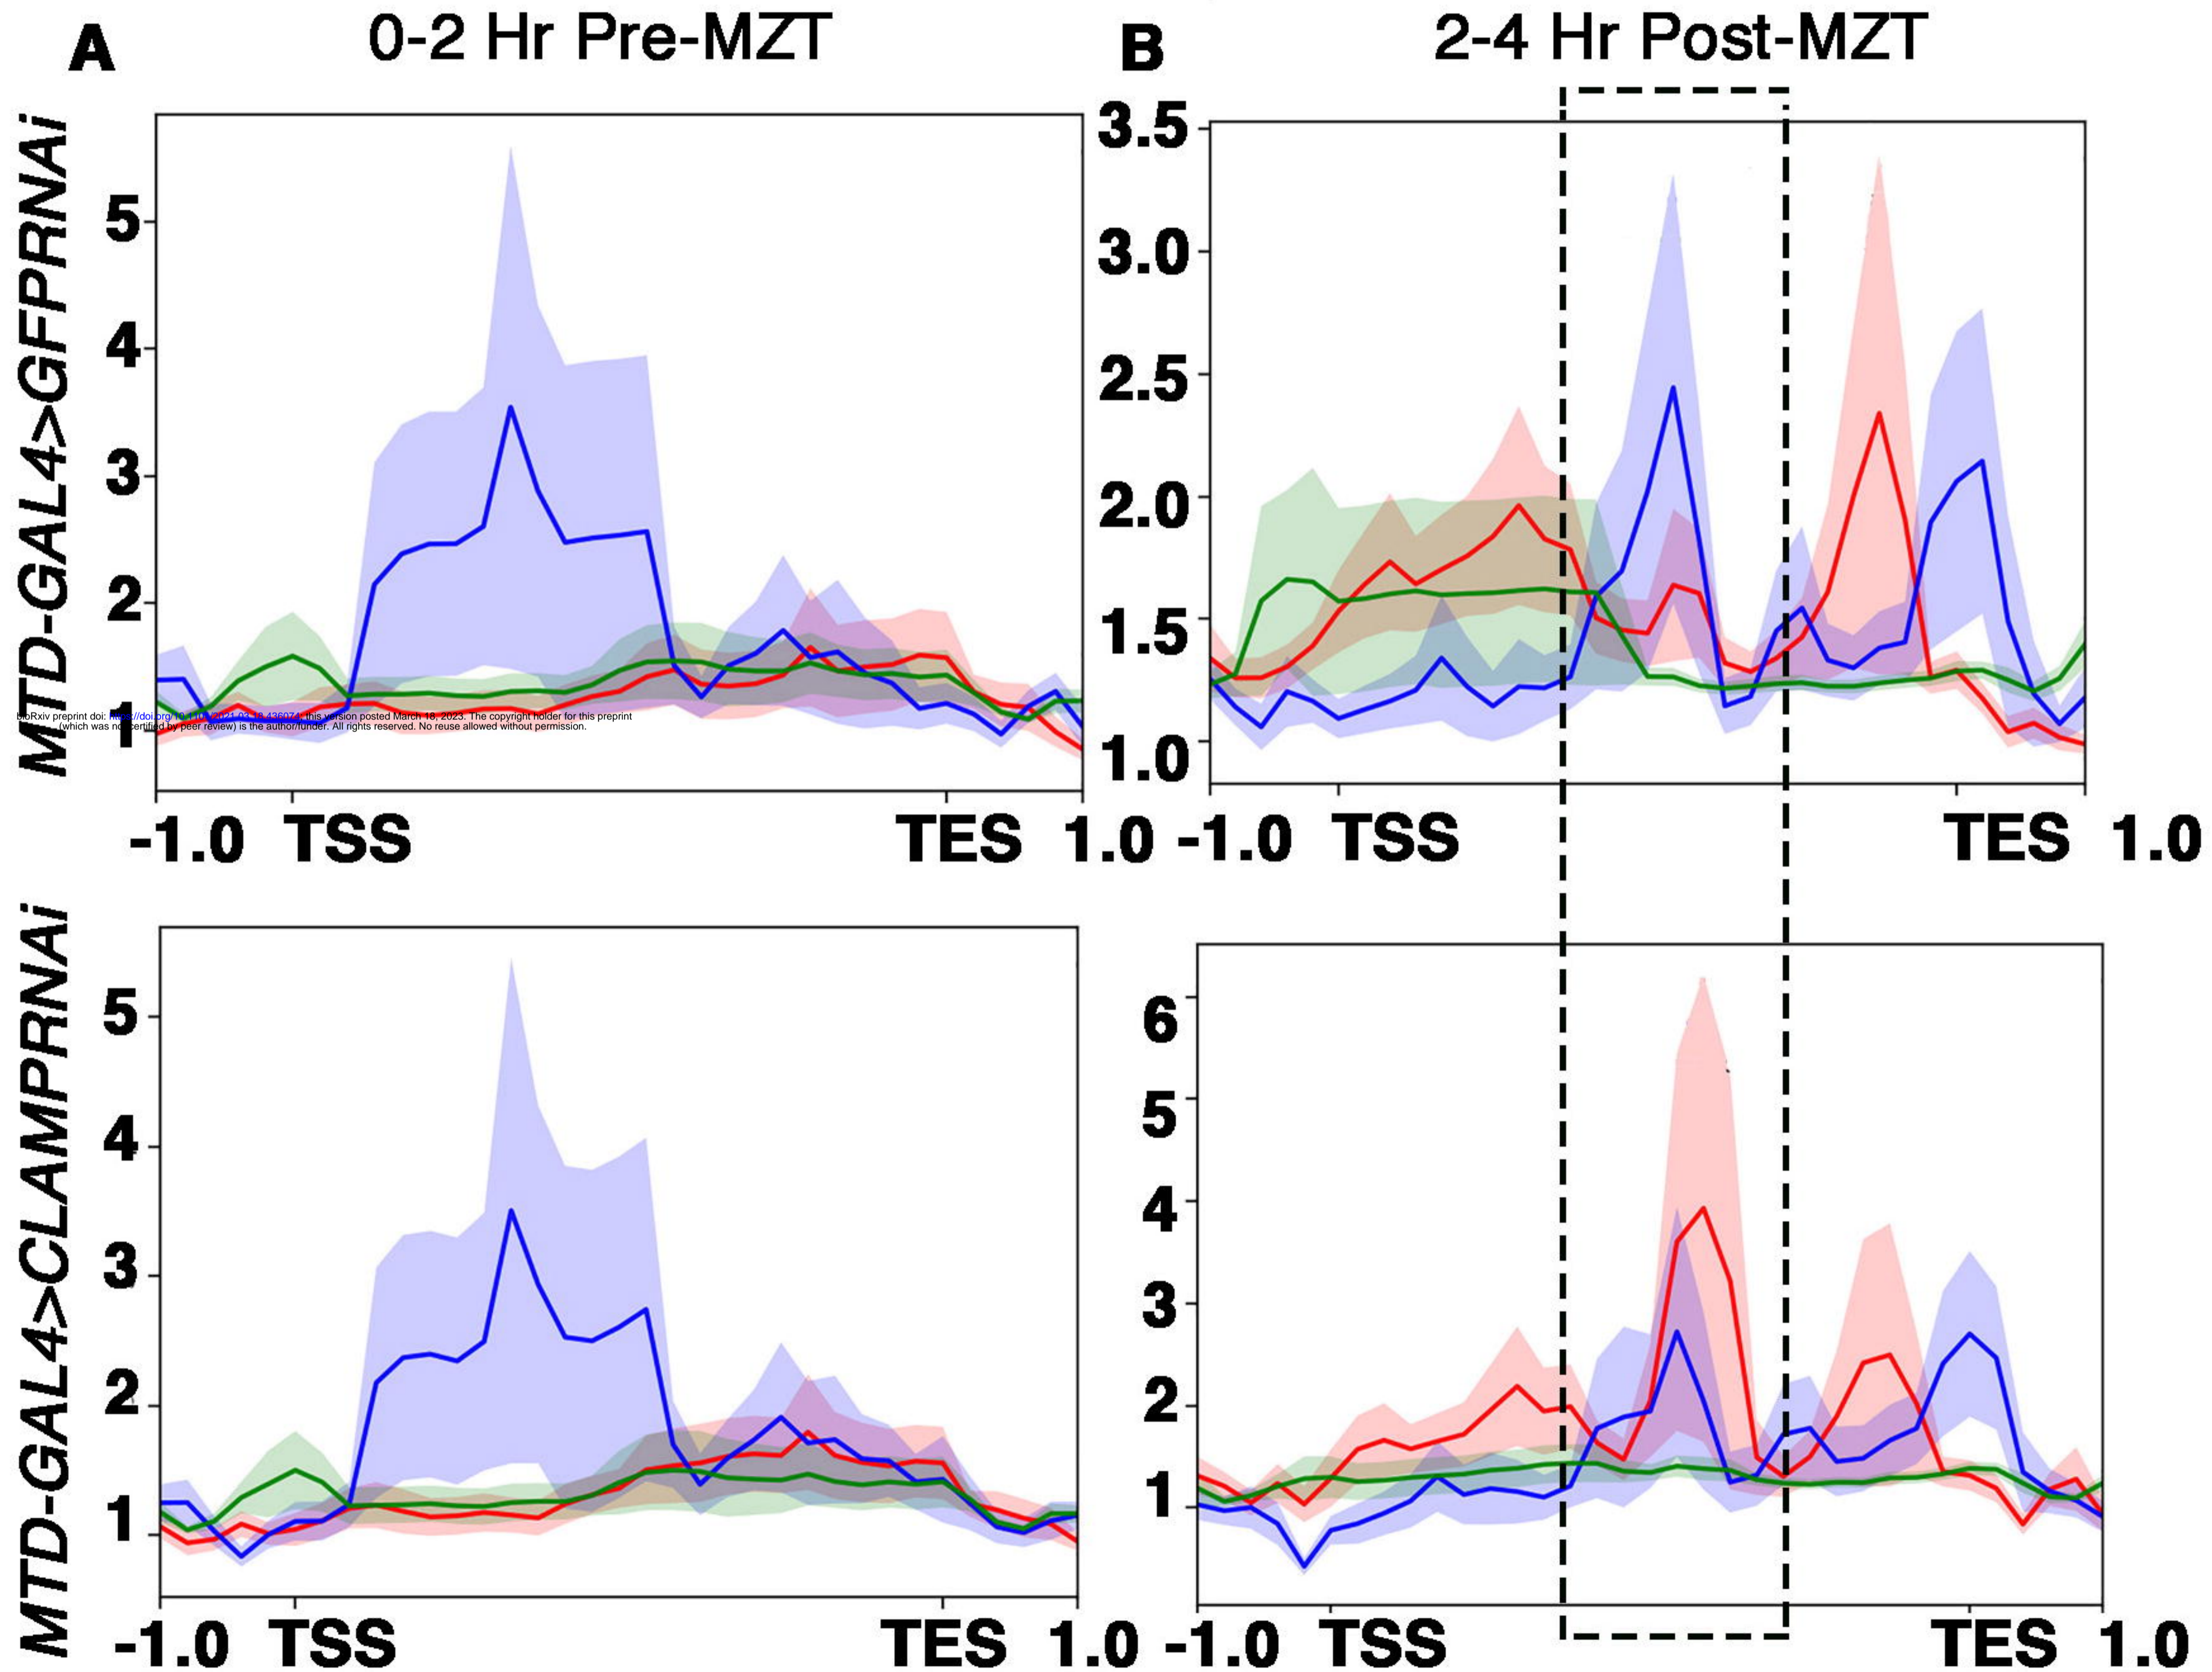

**A**

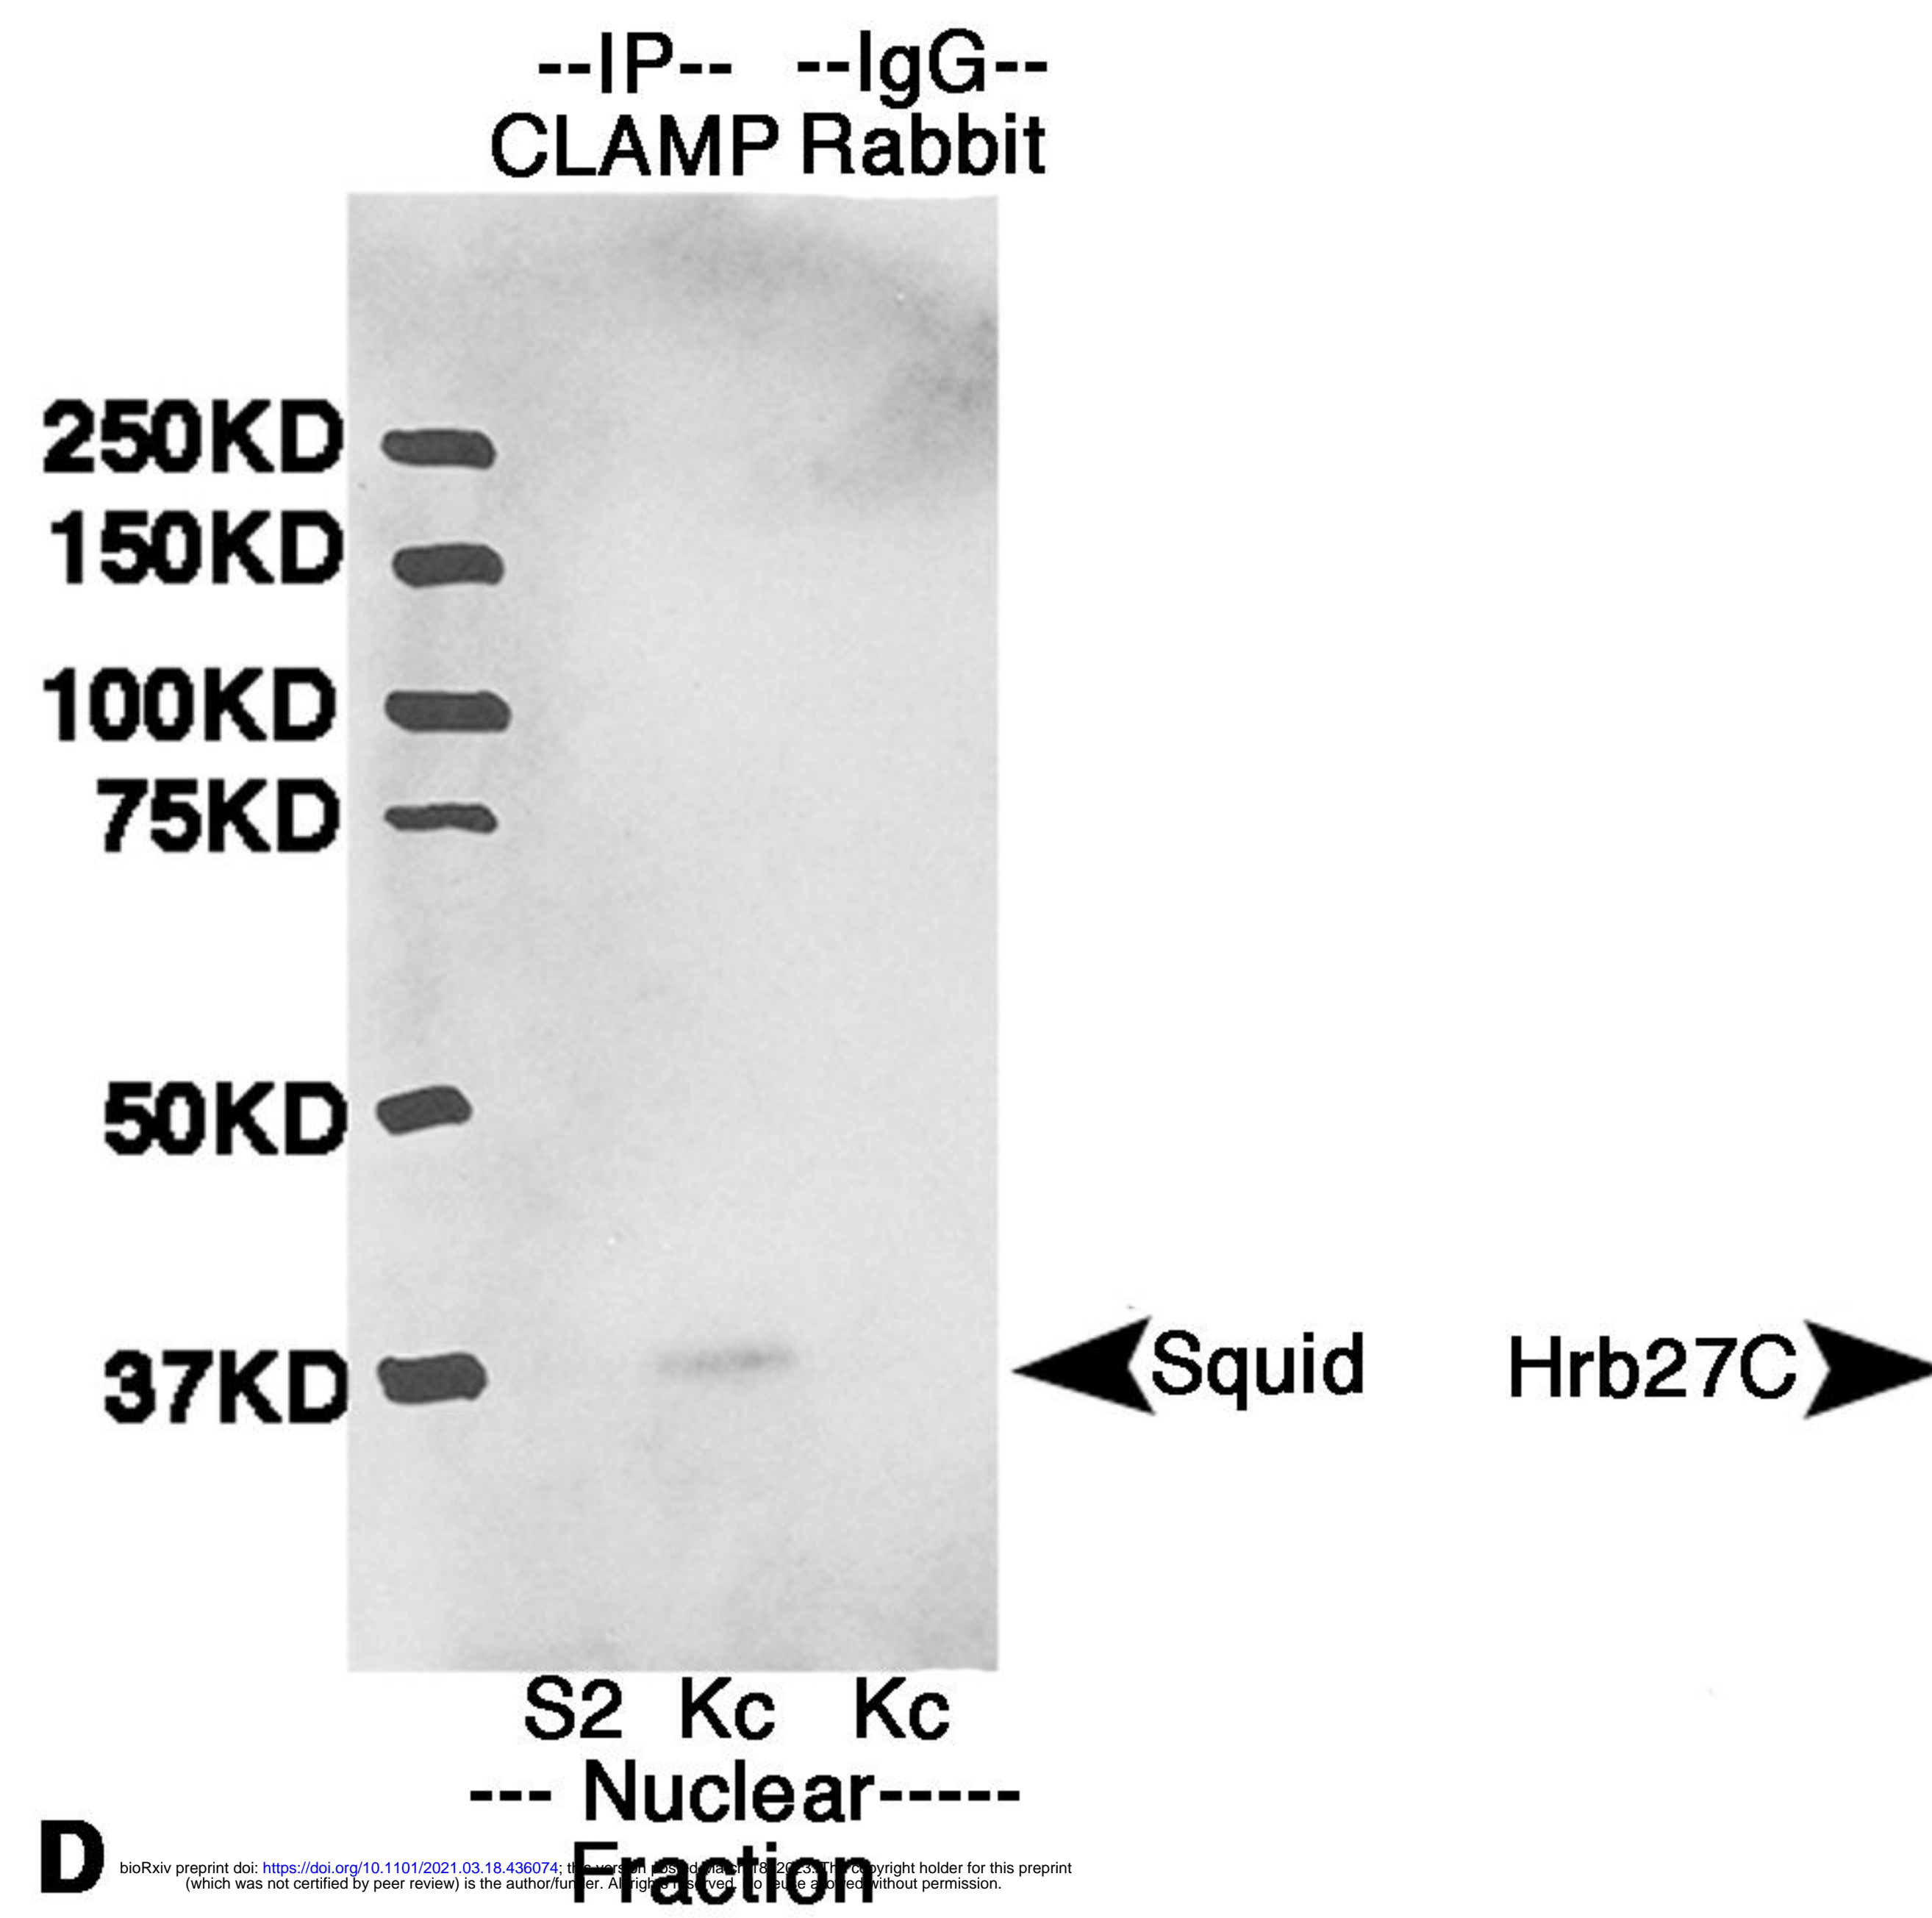

**B**

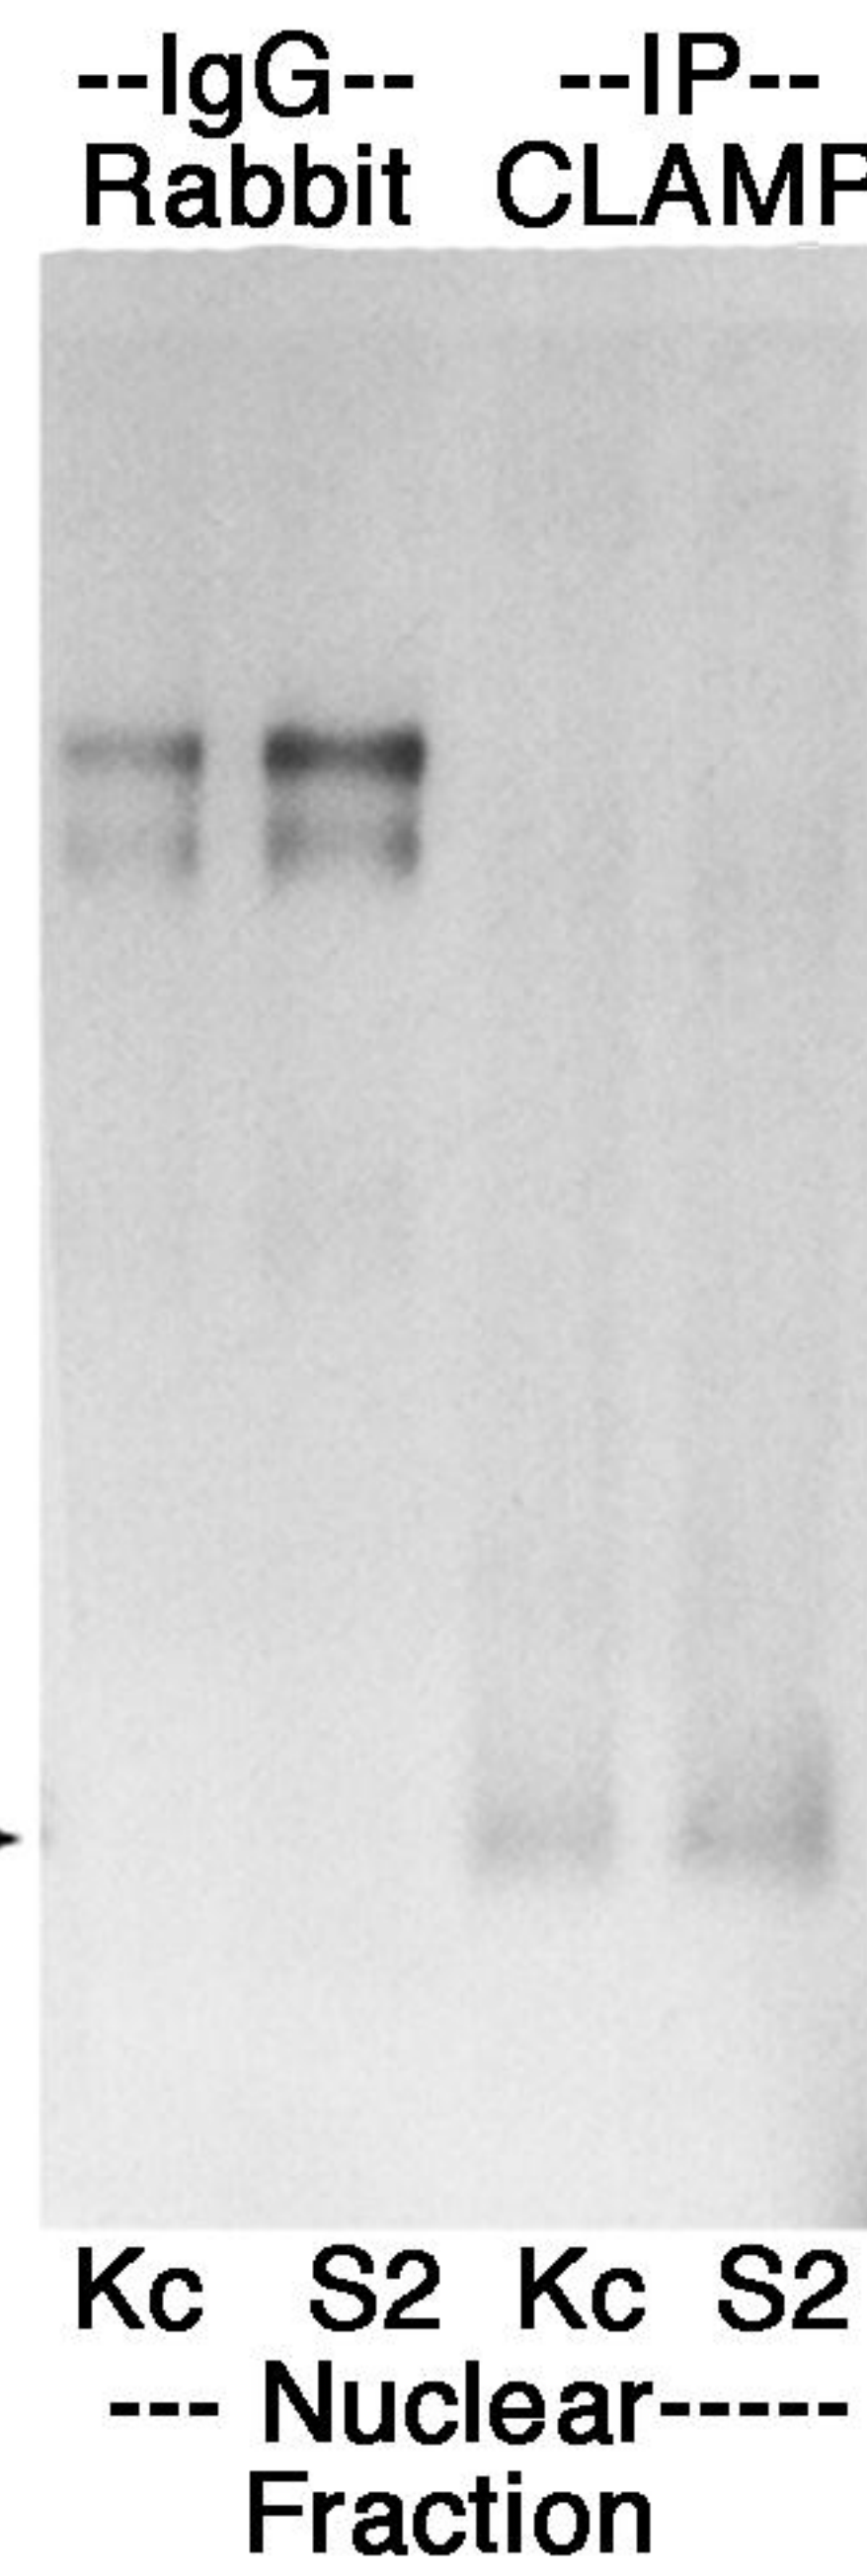

**C**

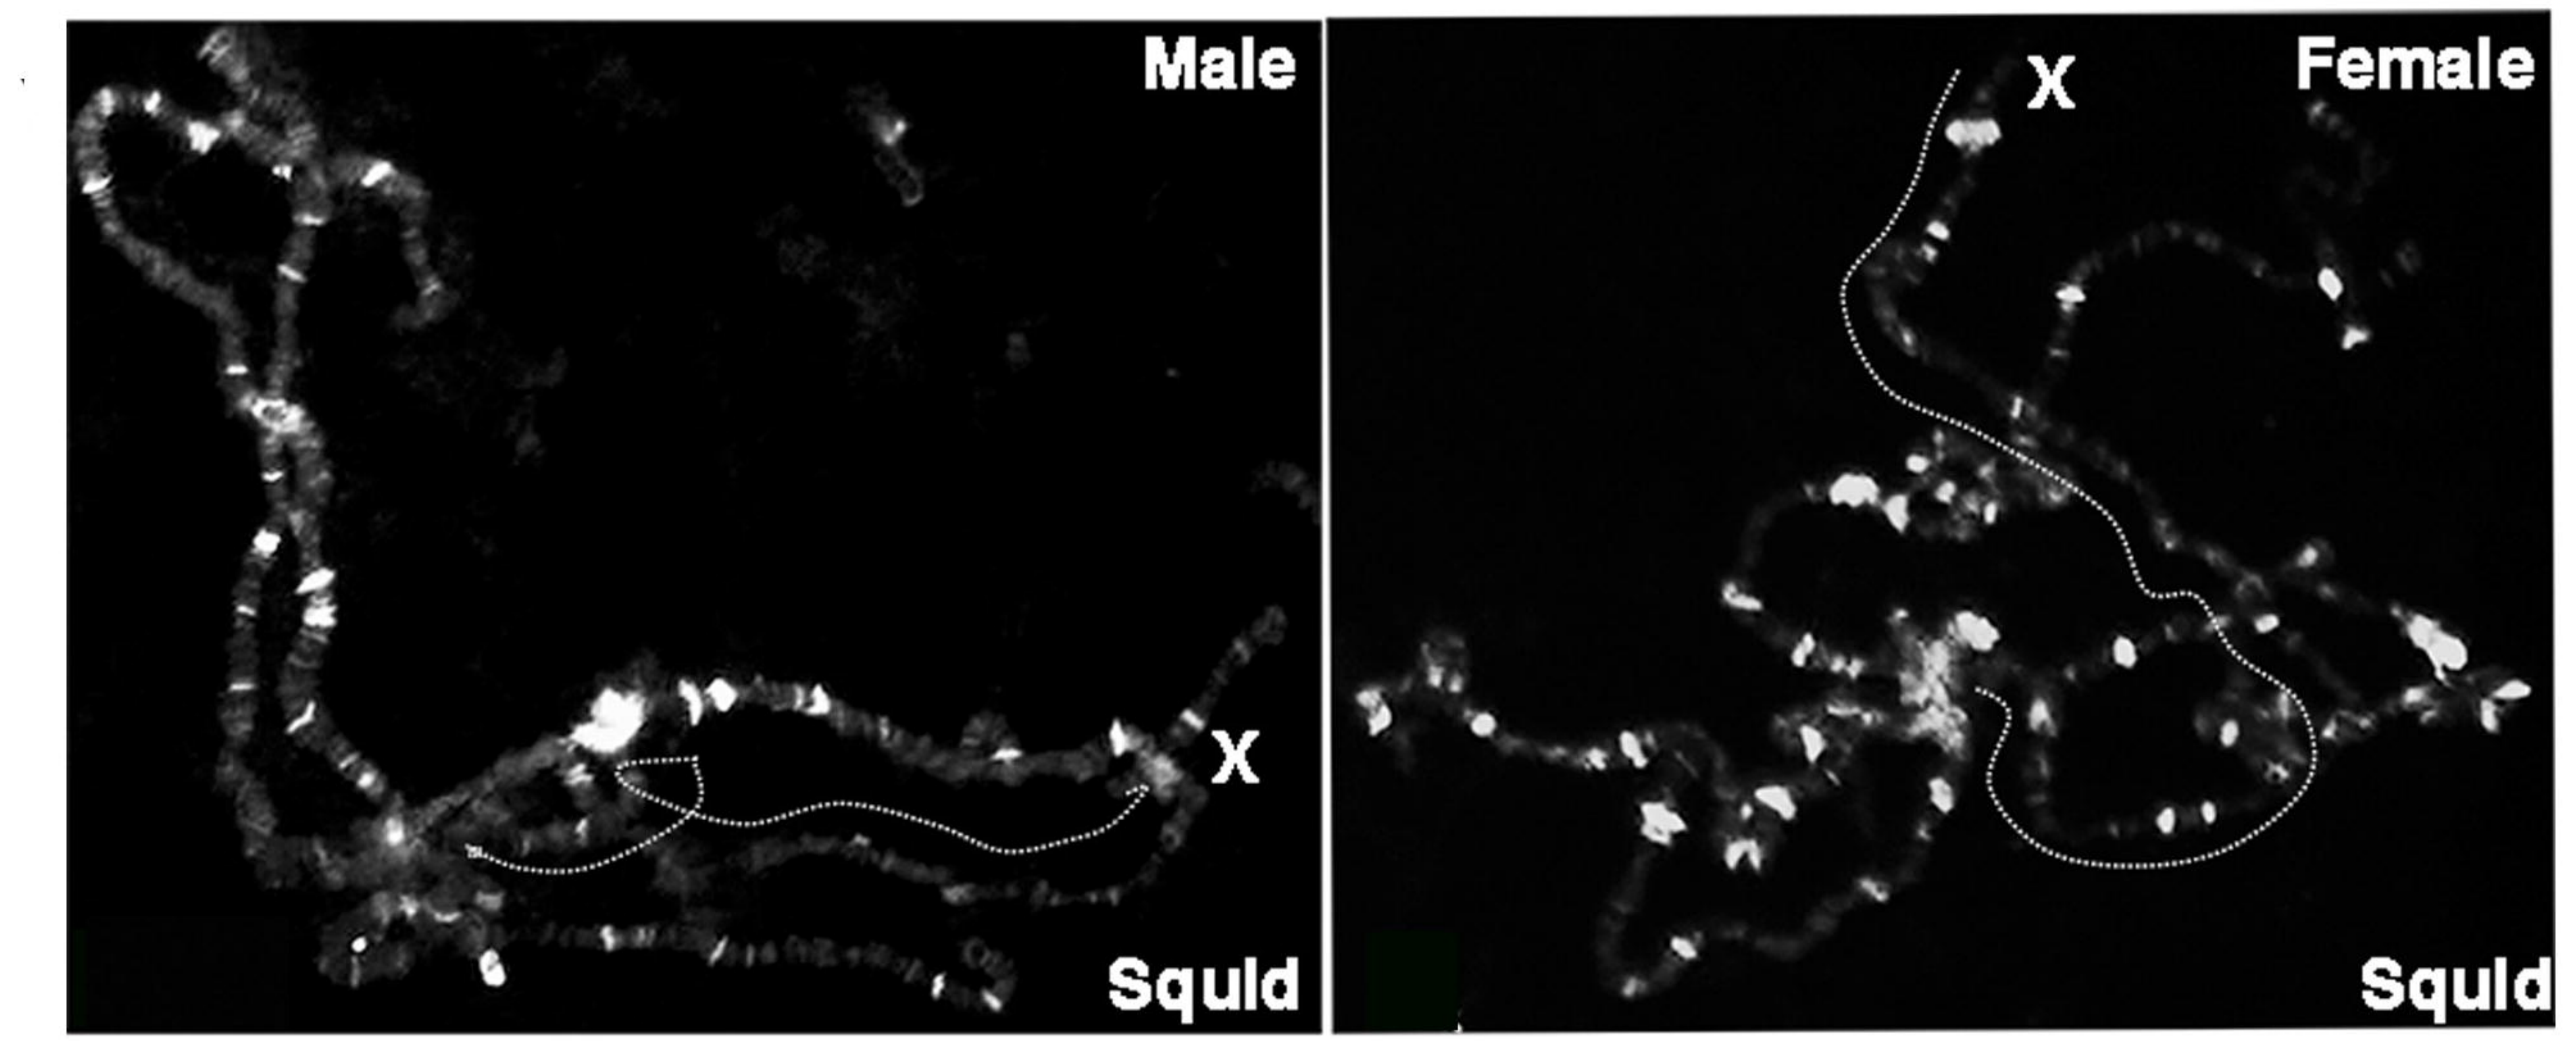

**D**

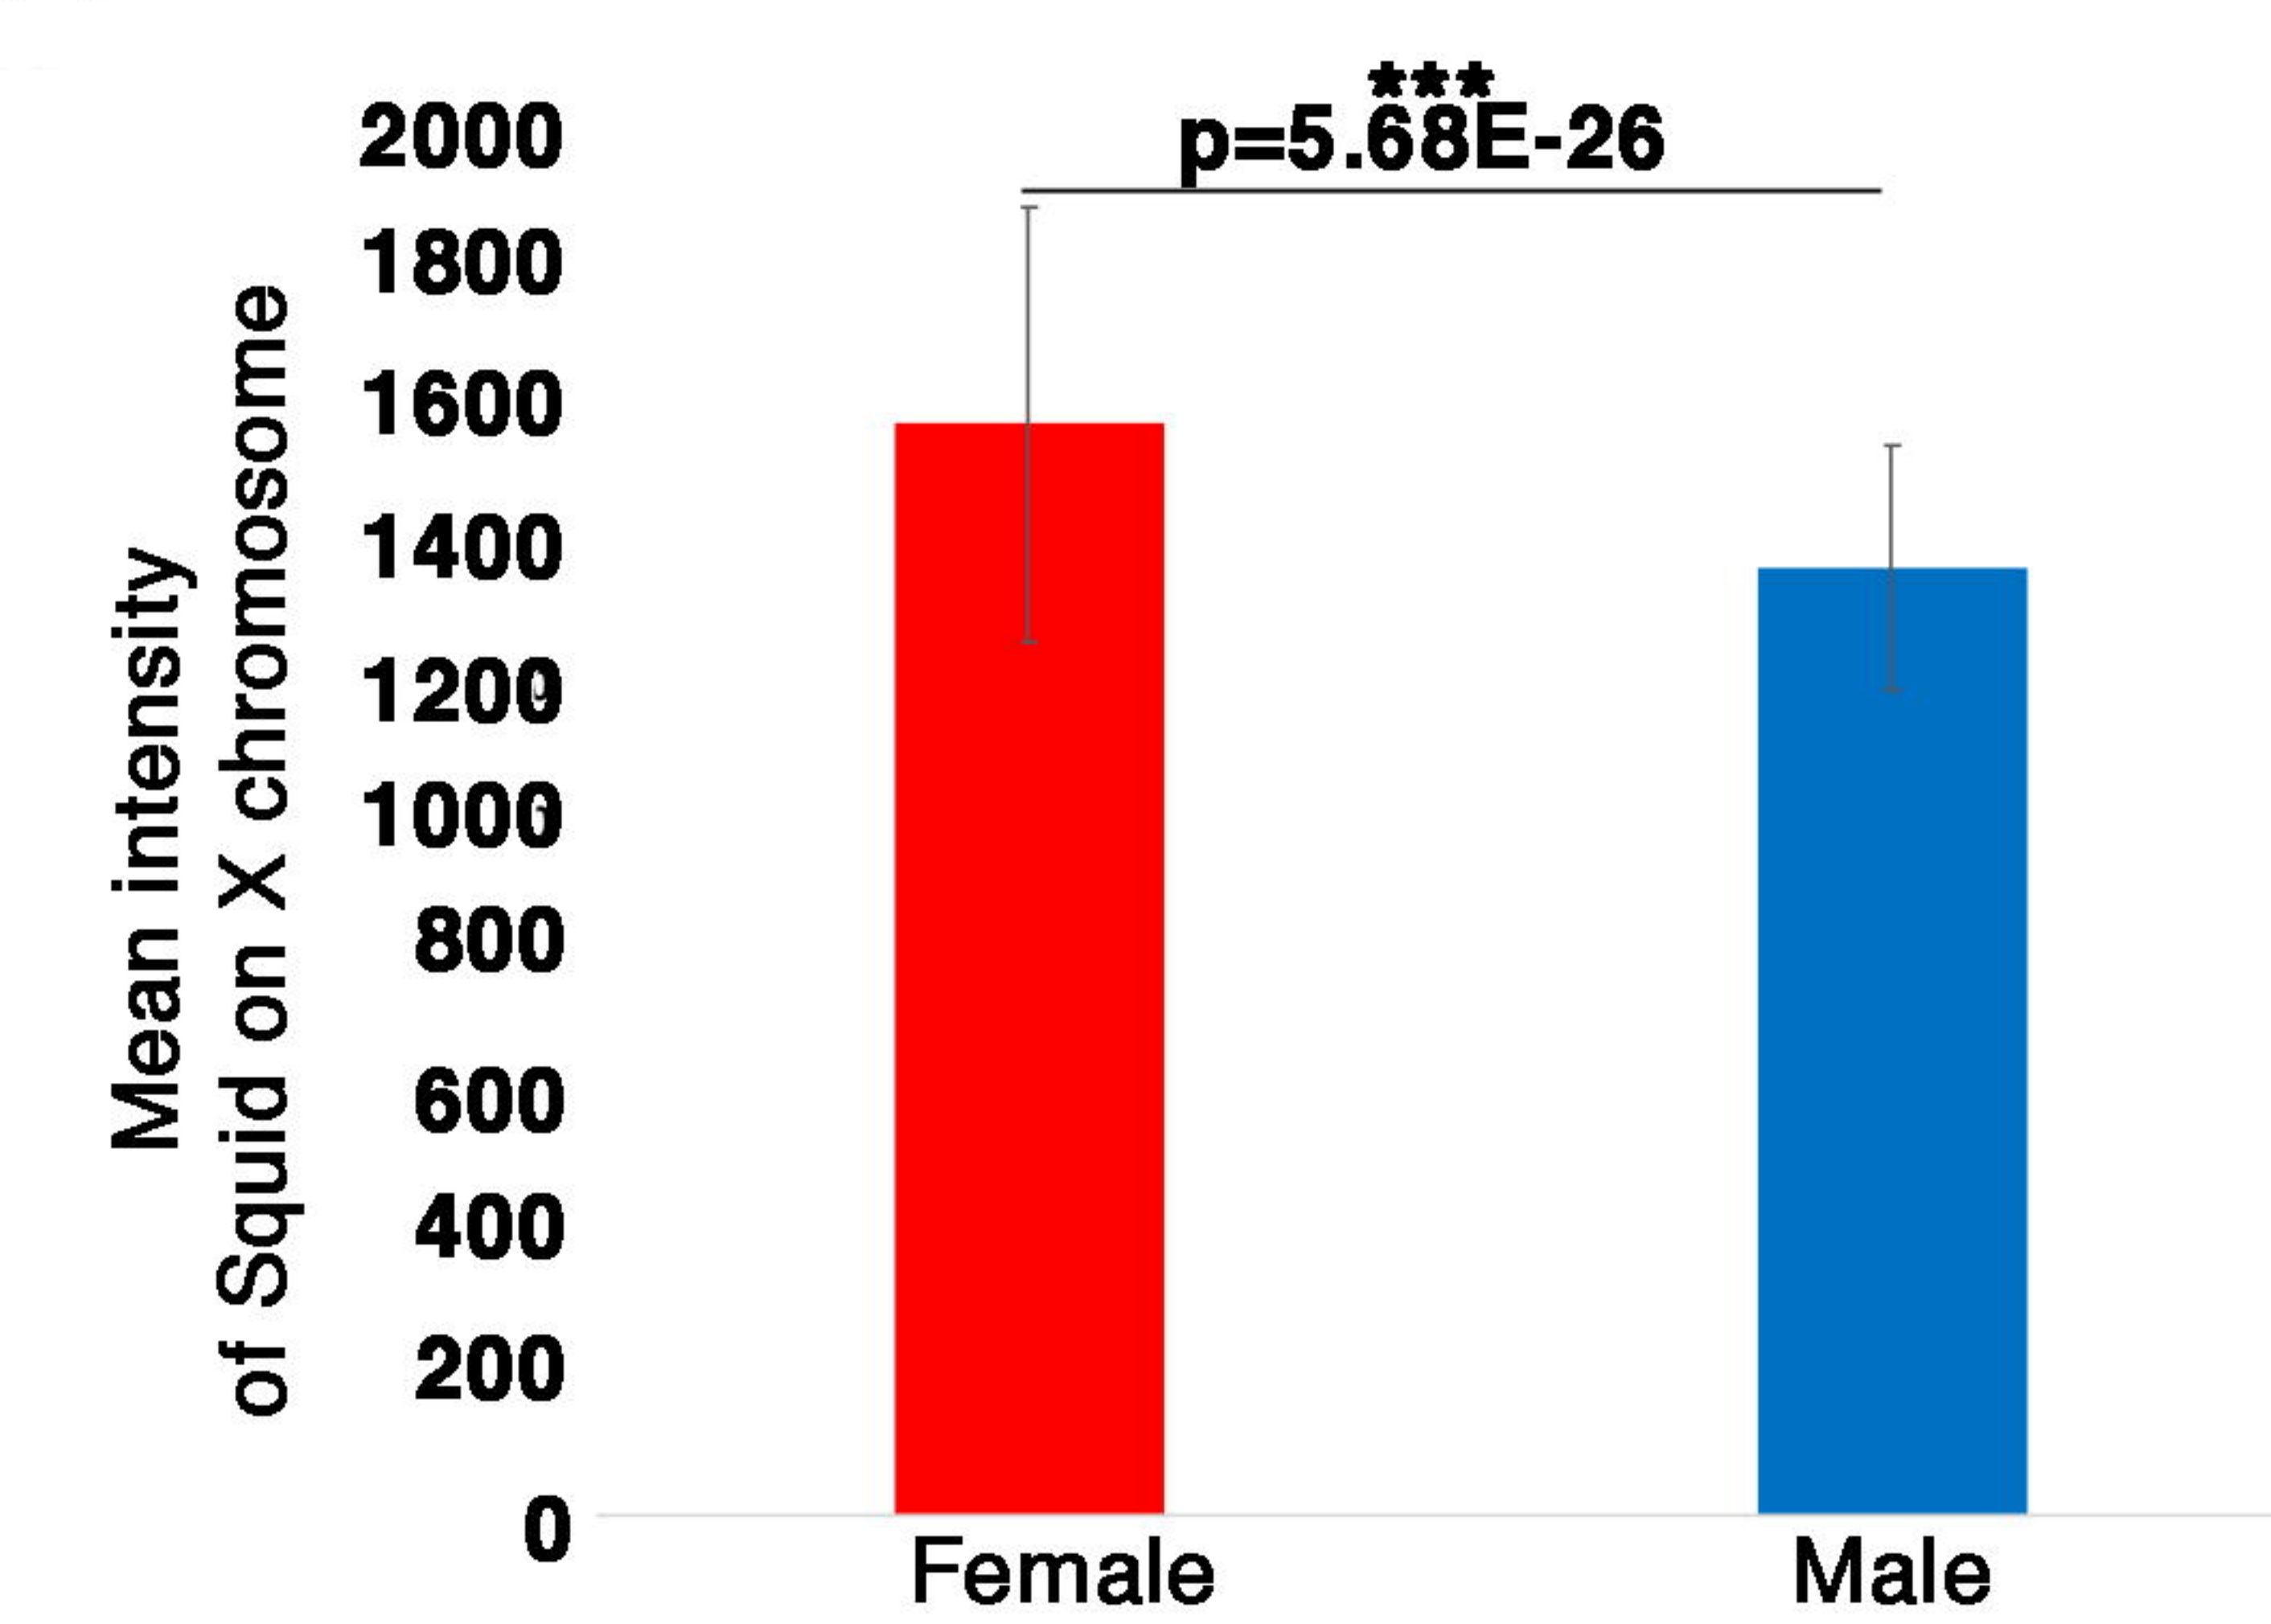

**E**

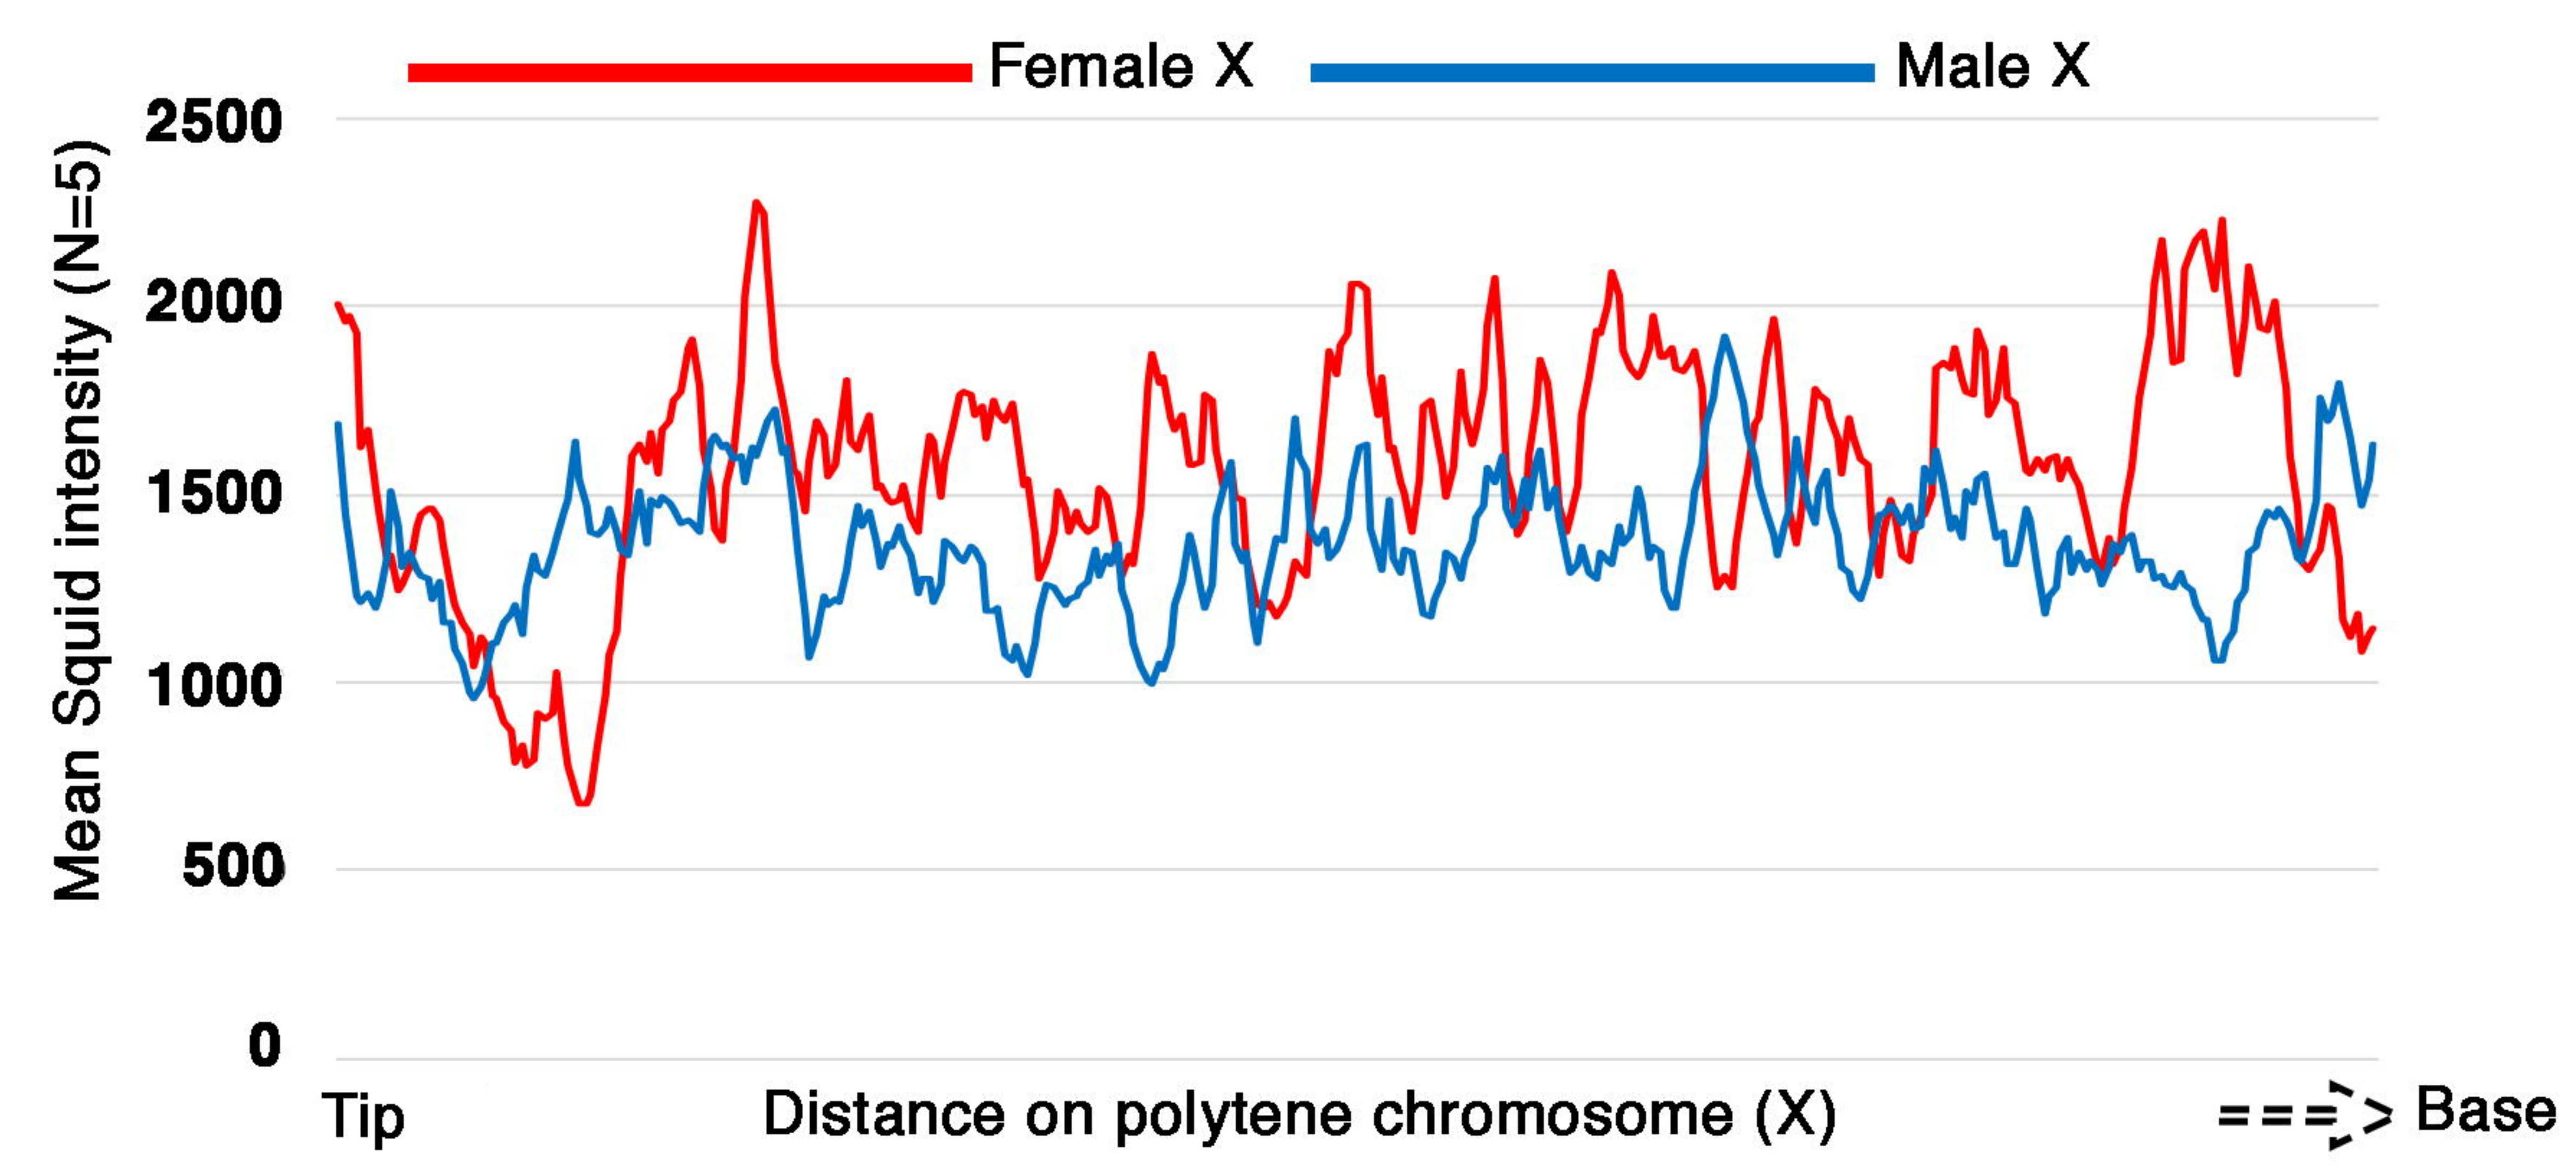

### A splicing *sxl* transcripts

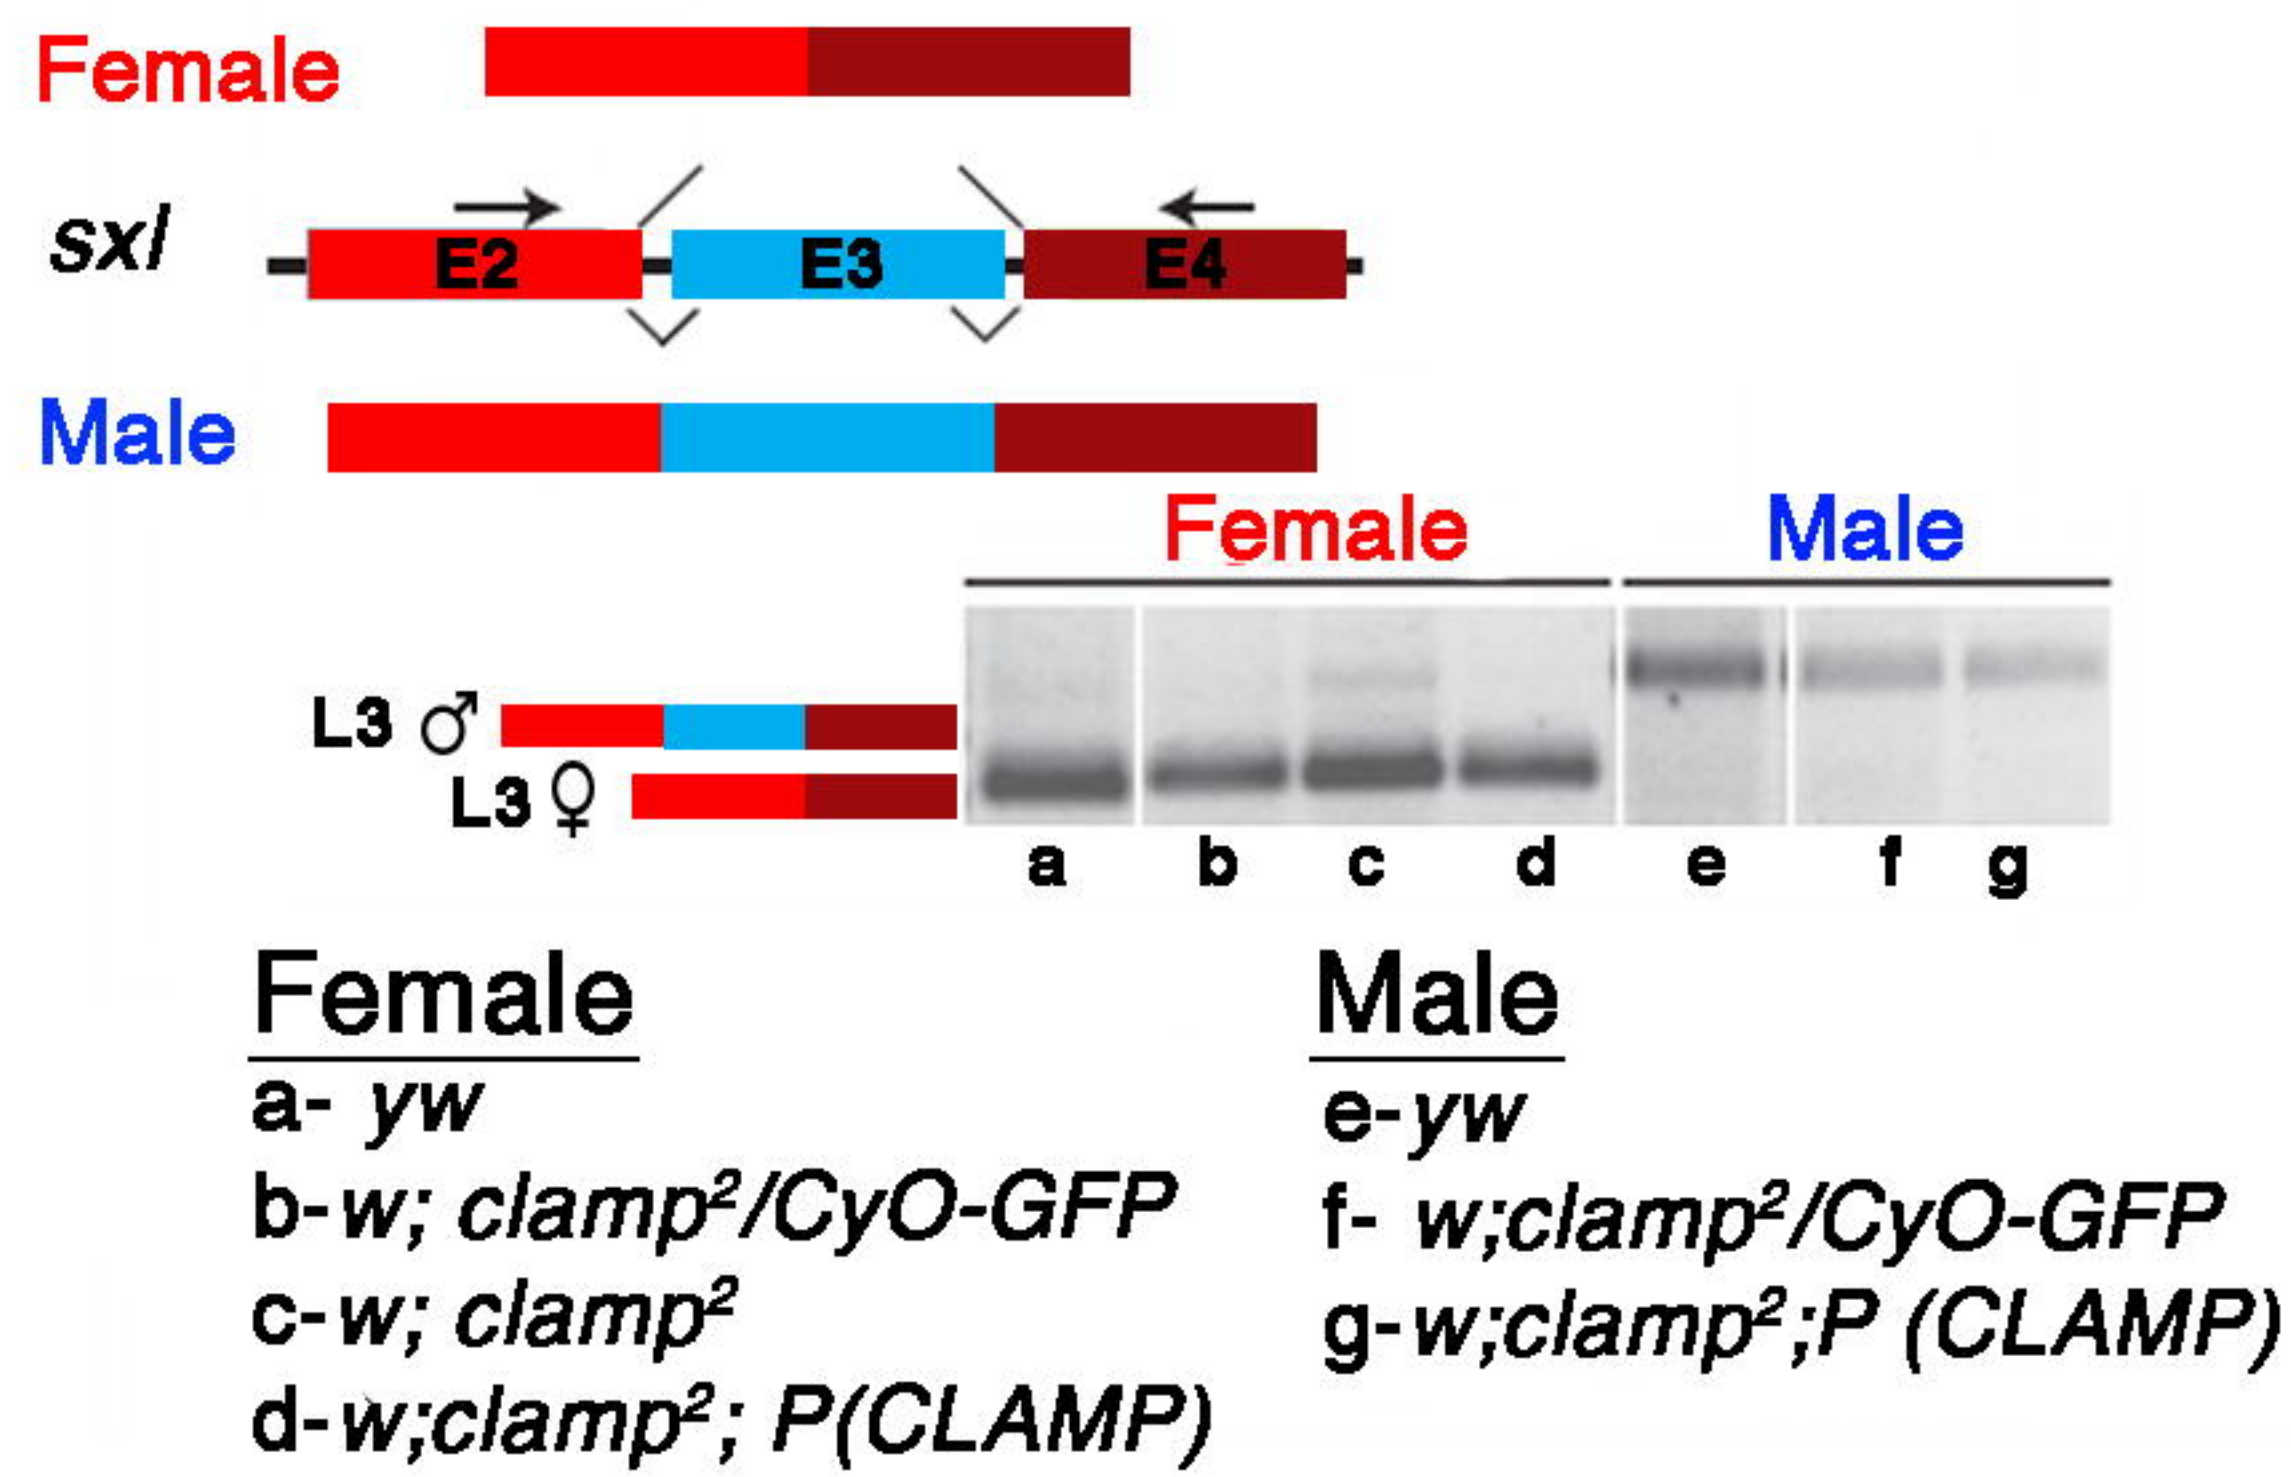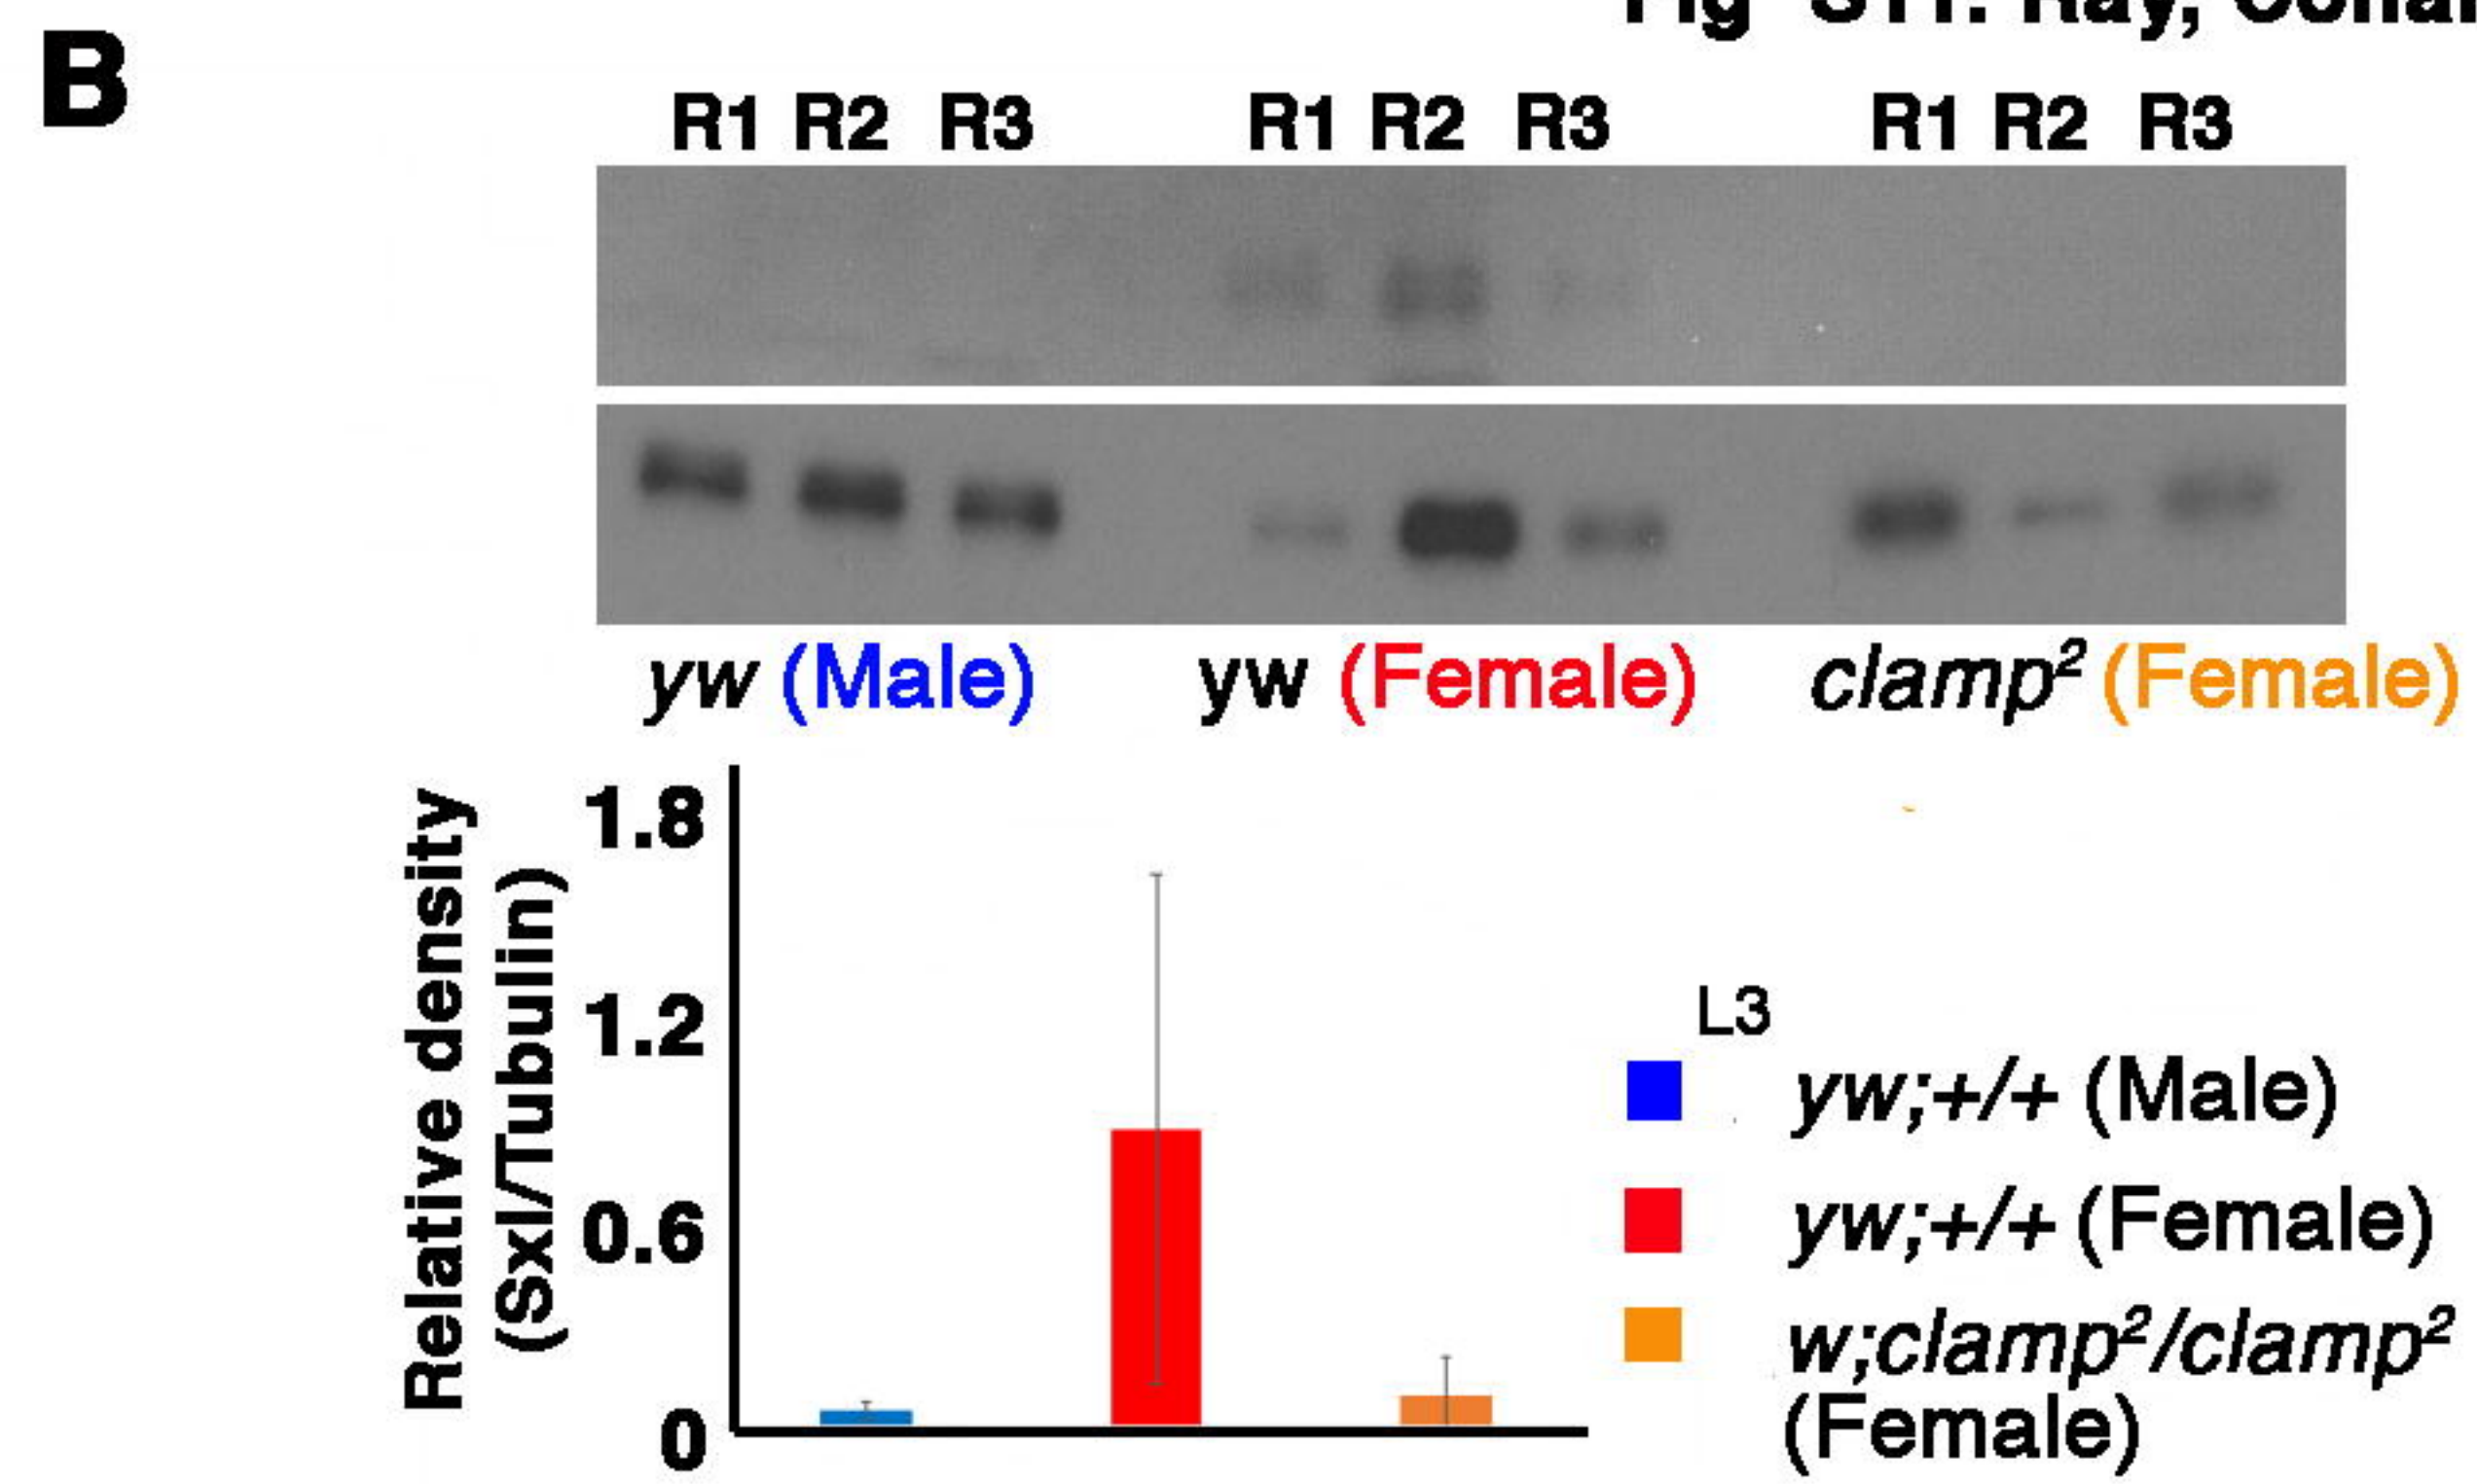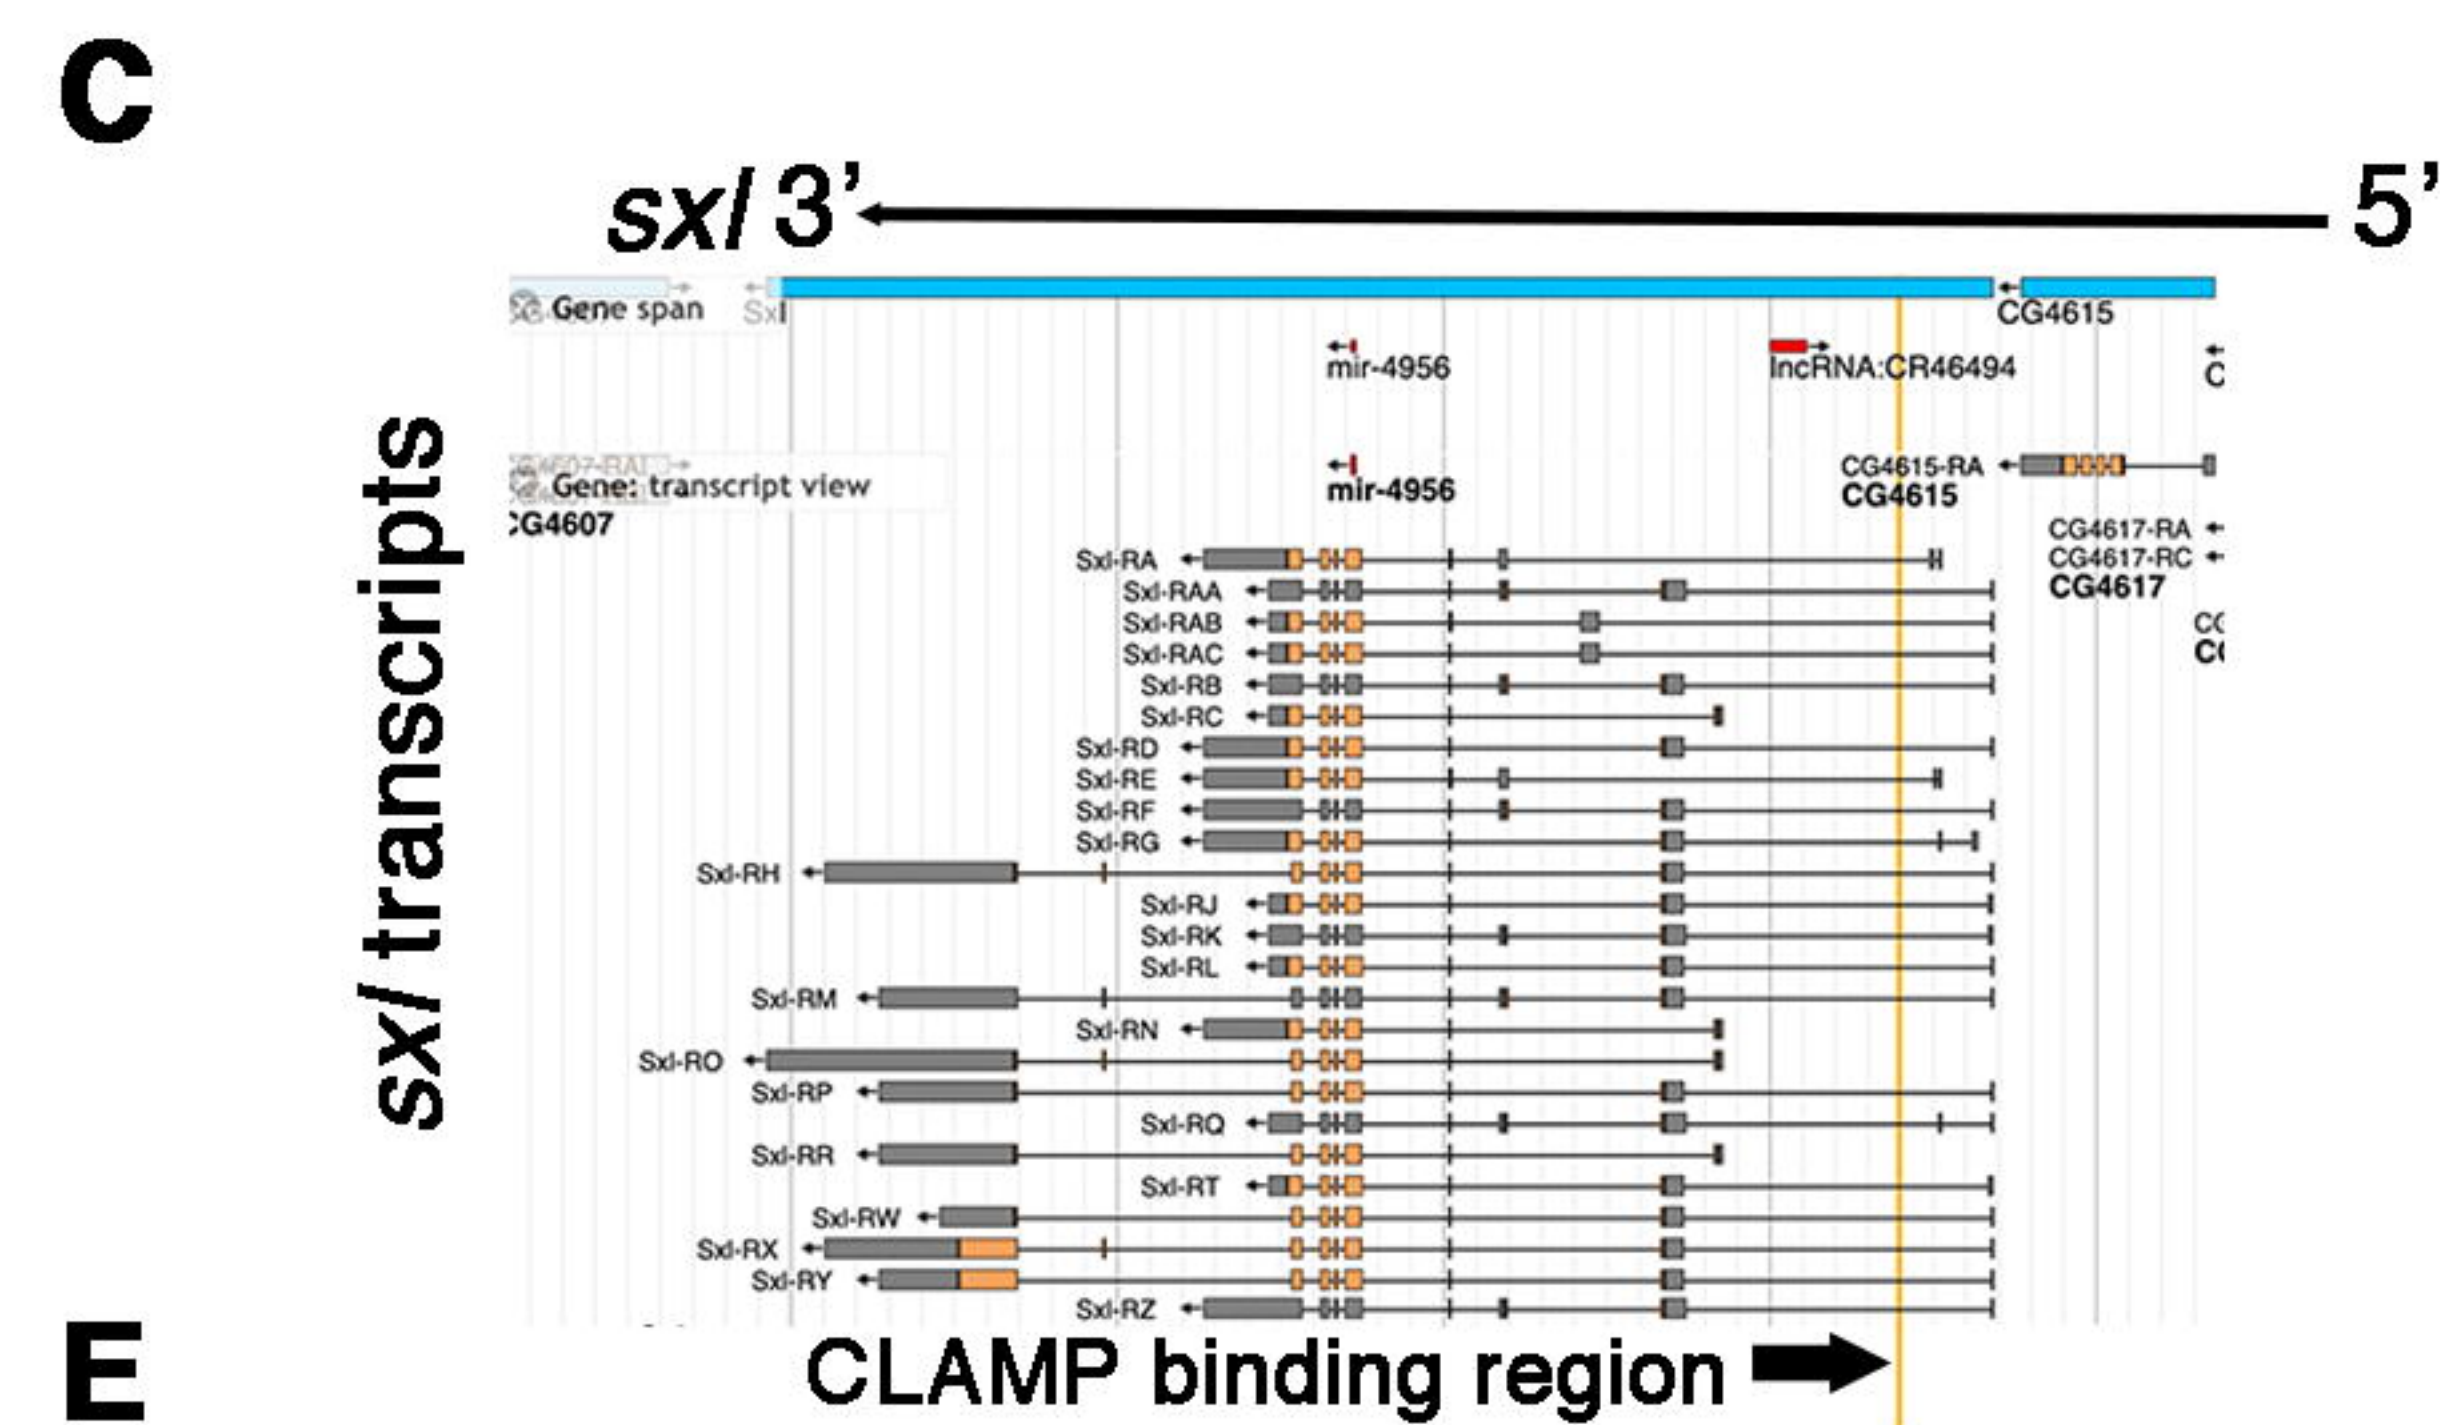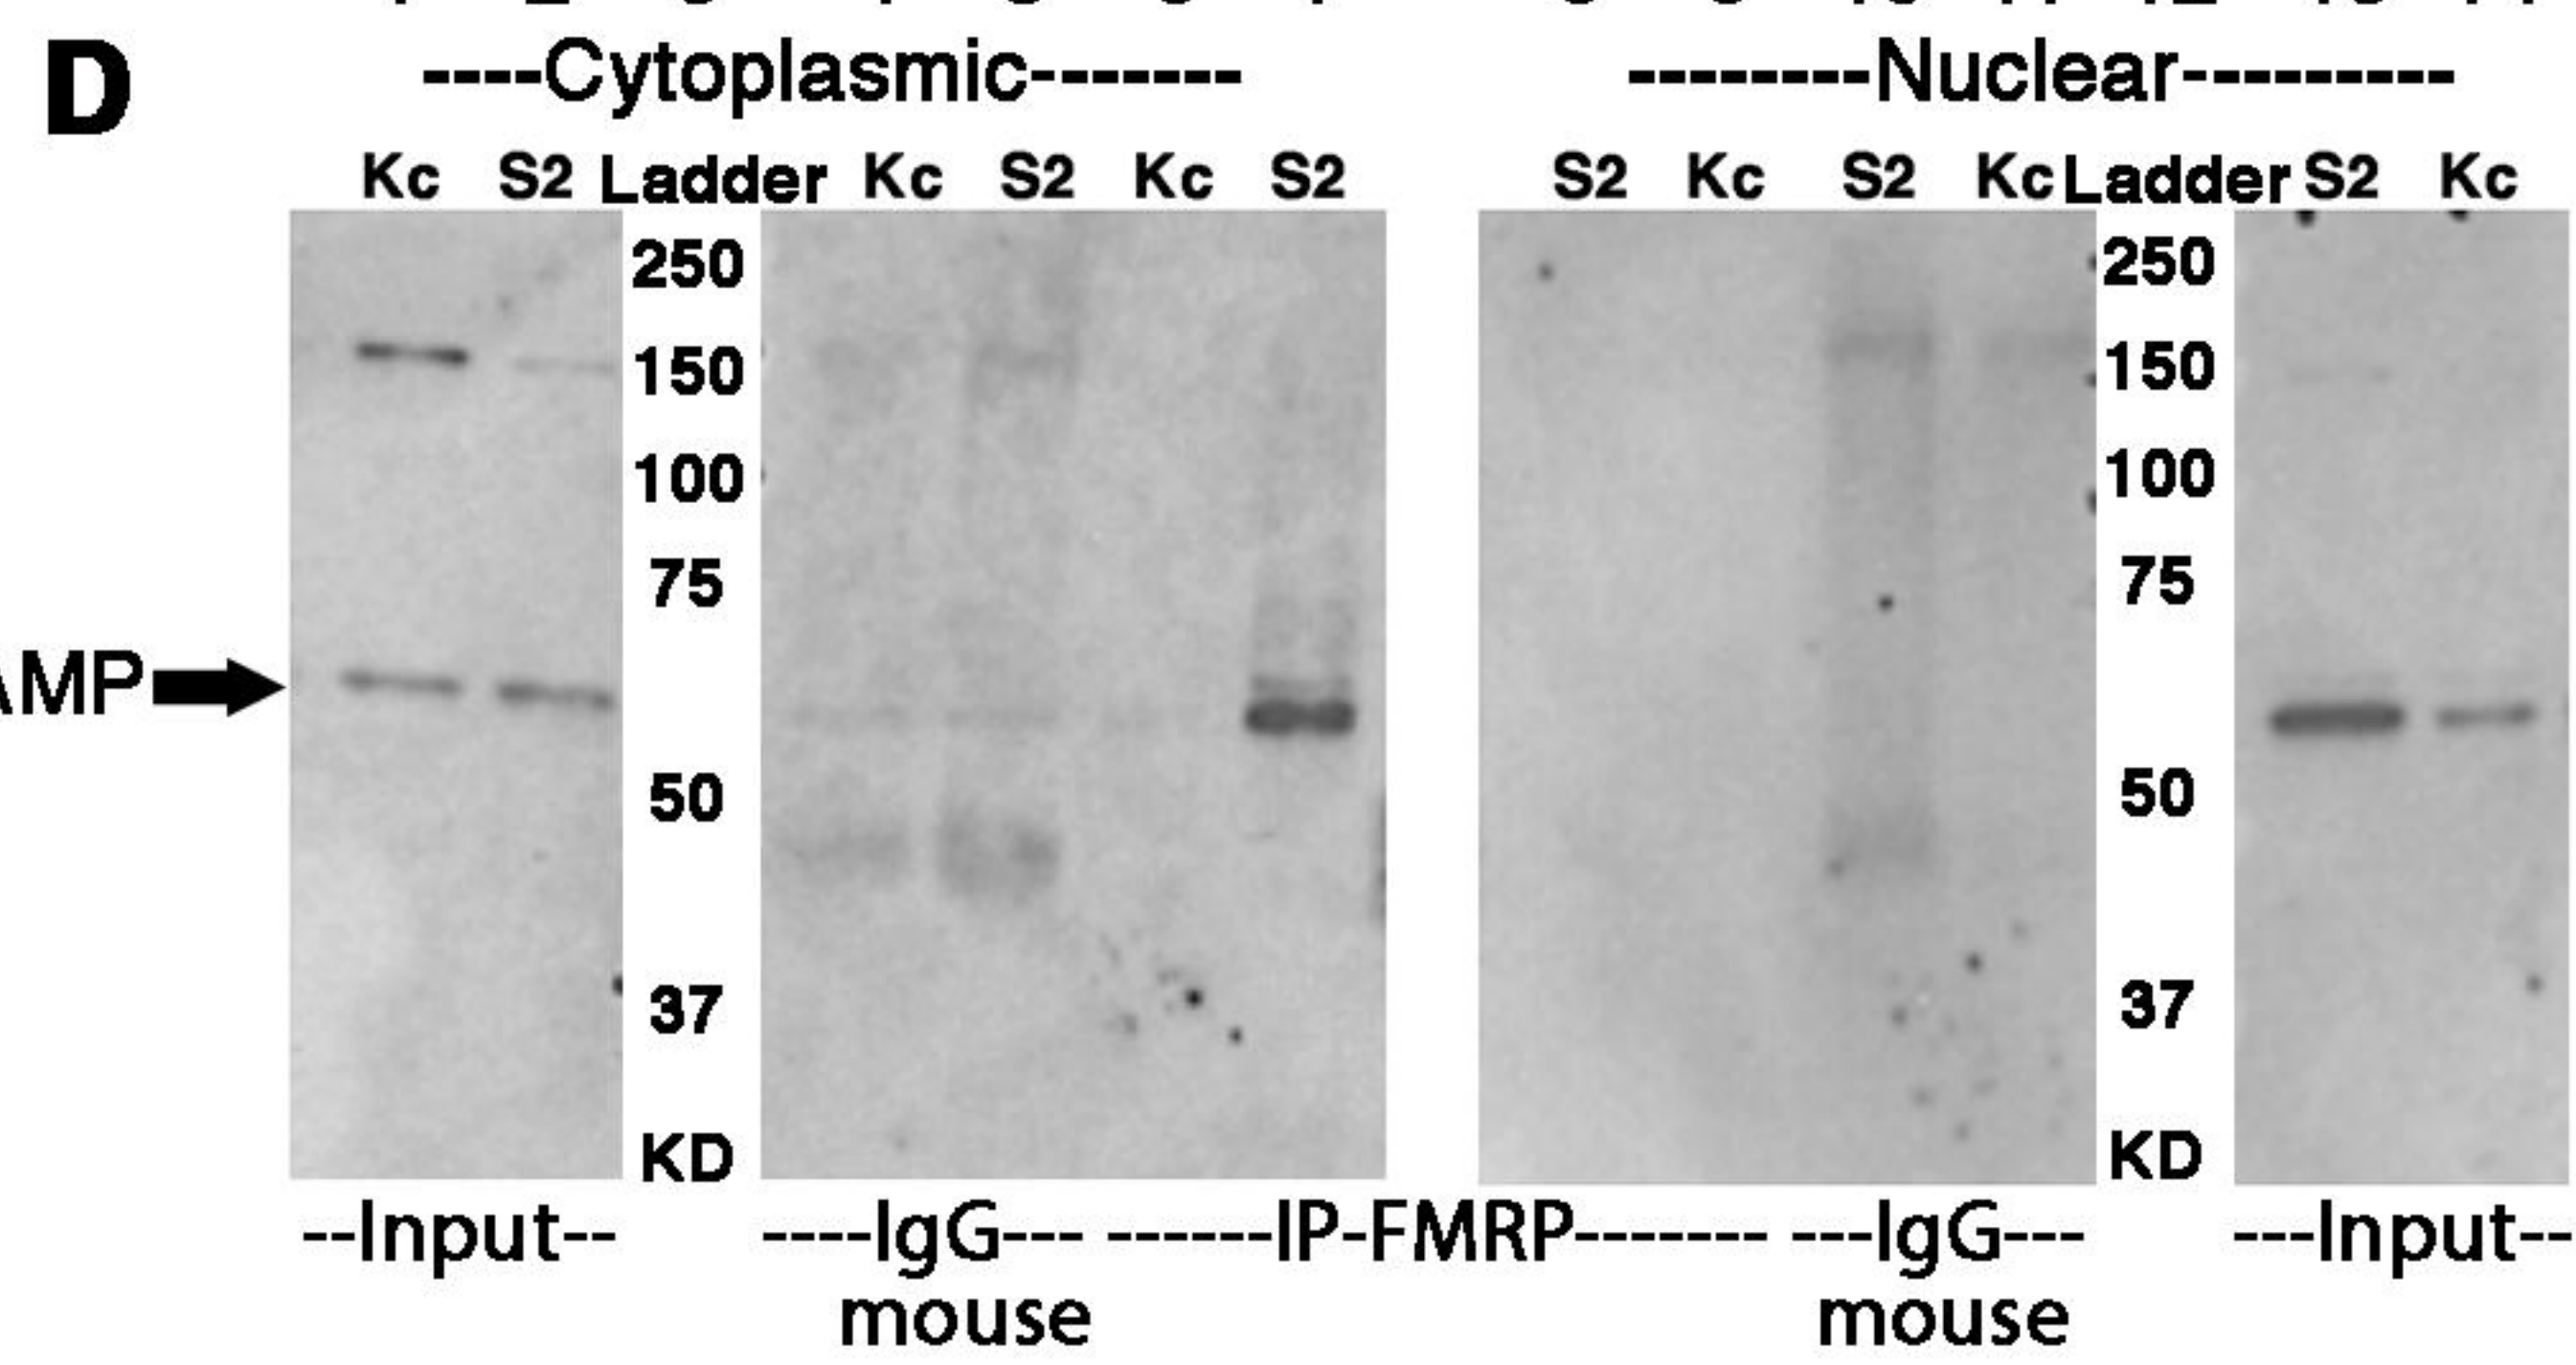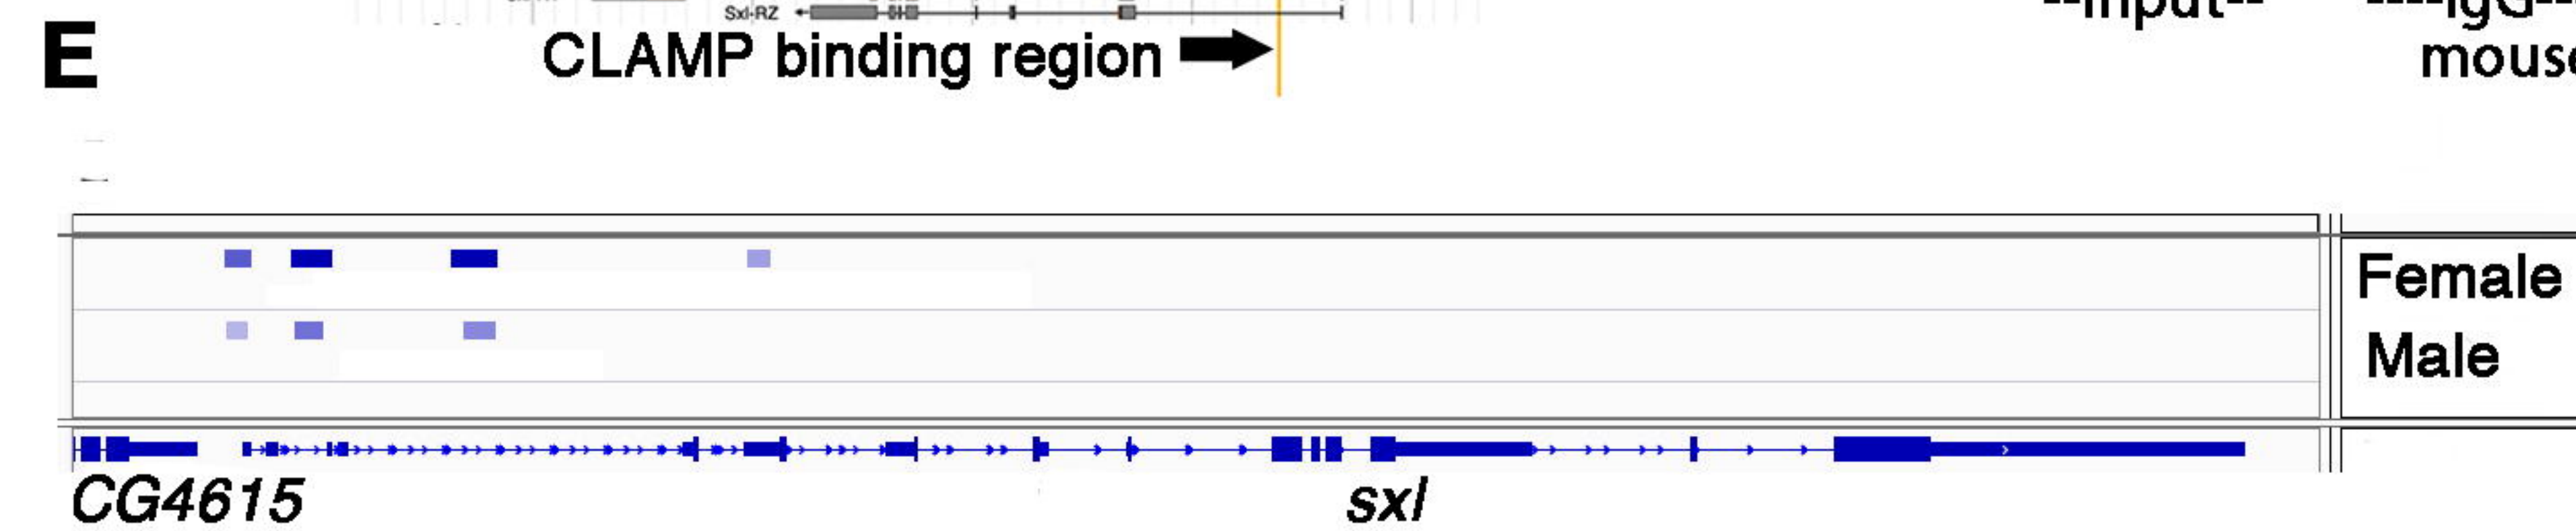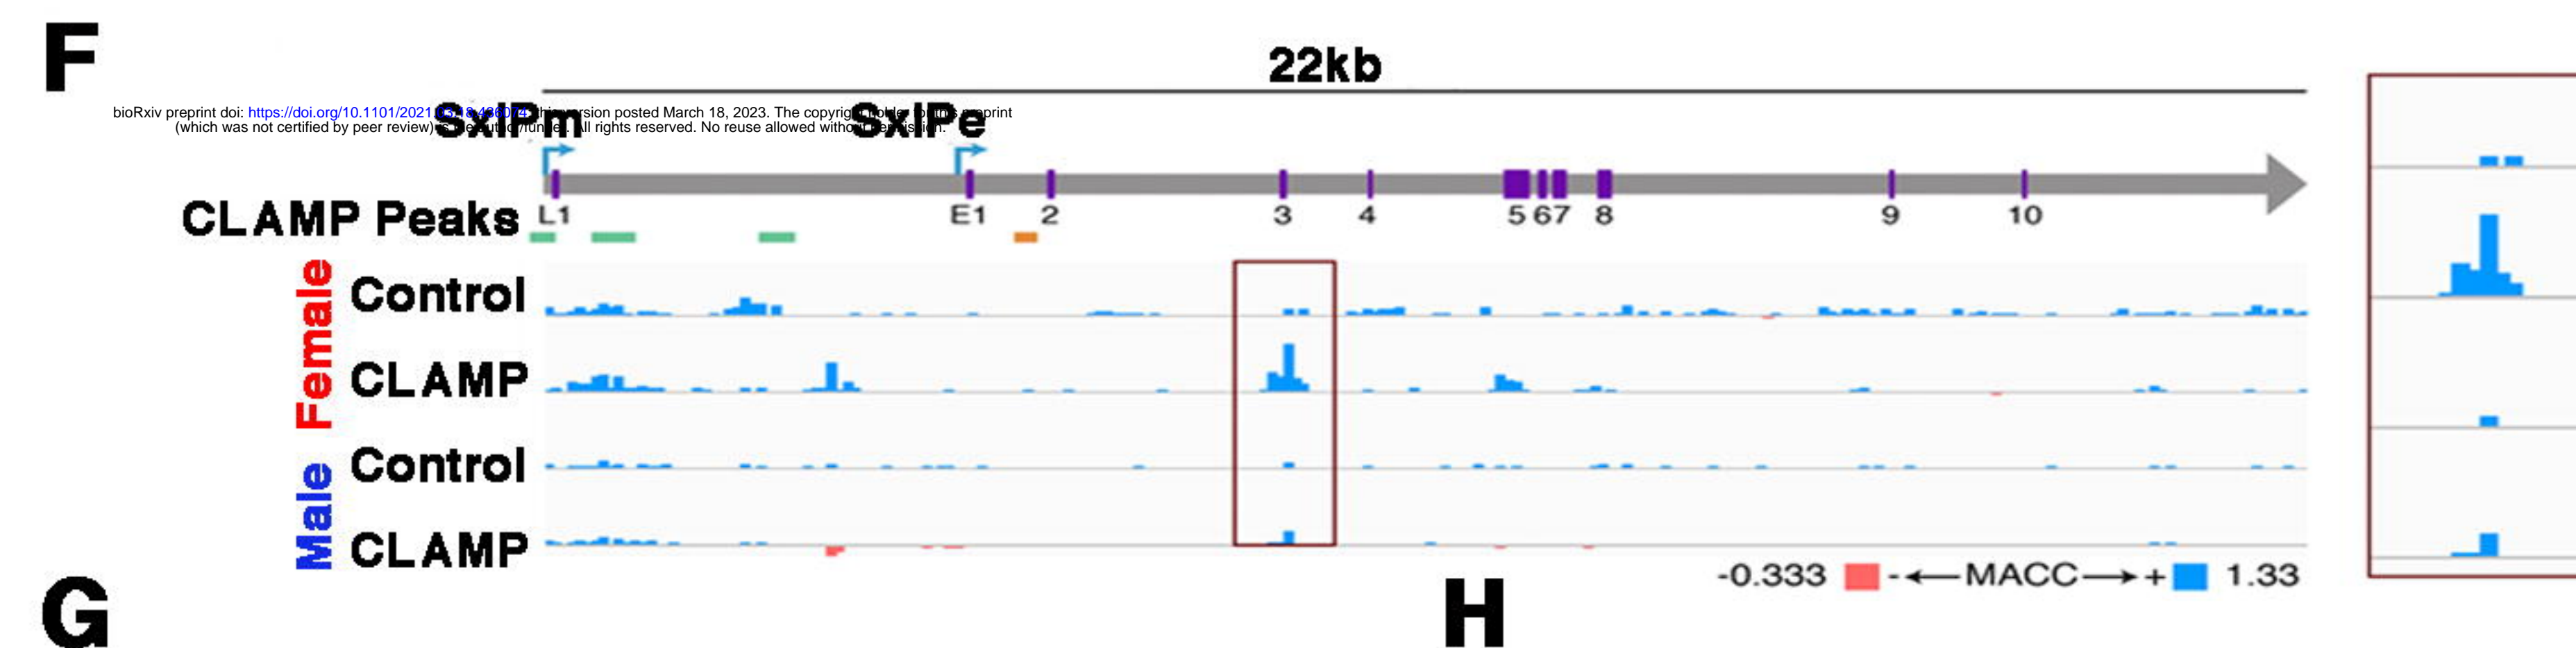

### G splicing *dsx* transcripts

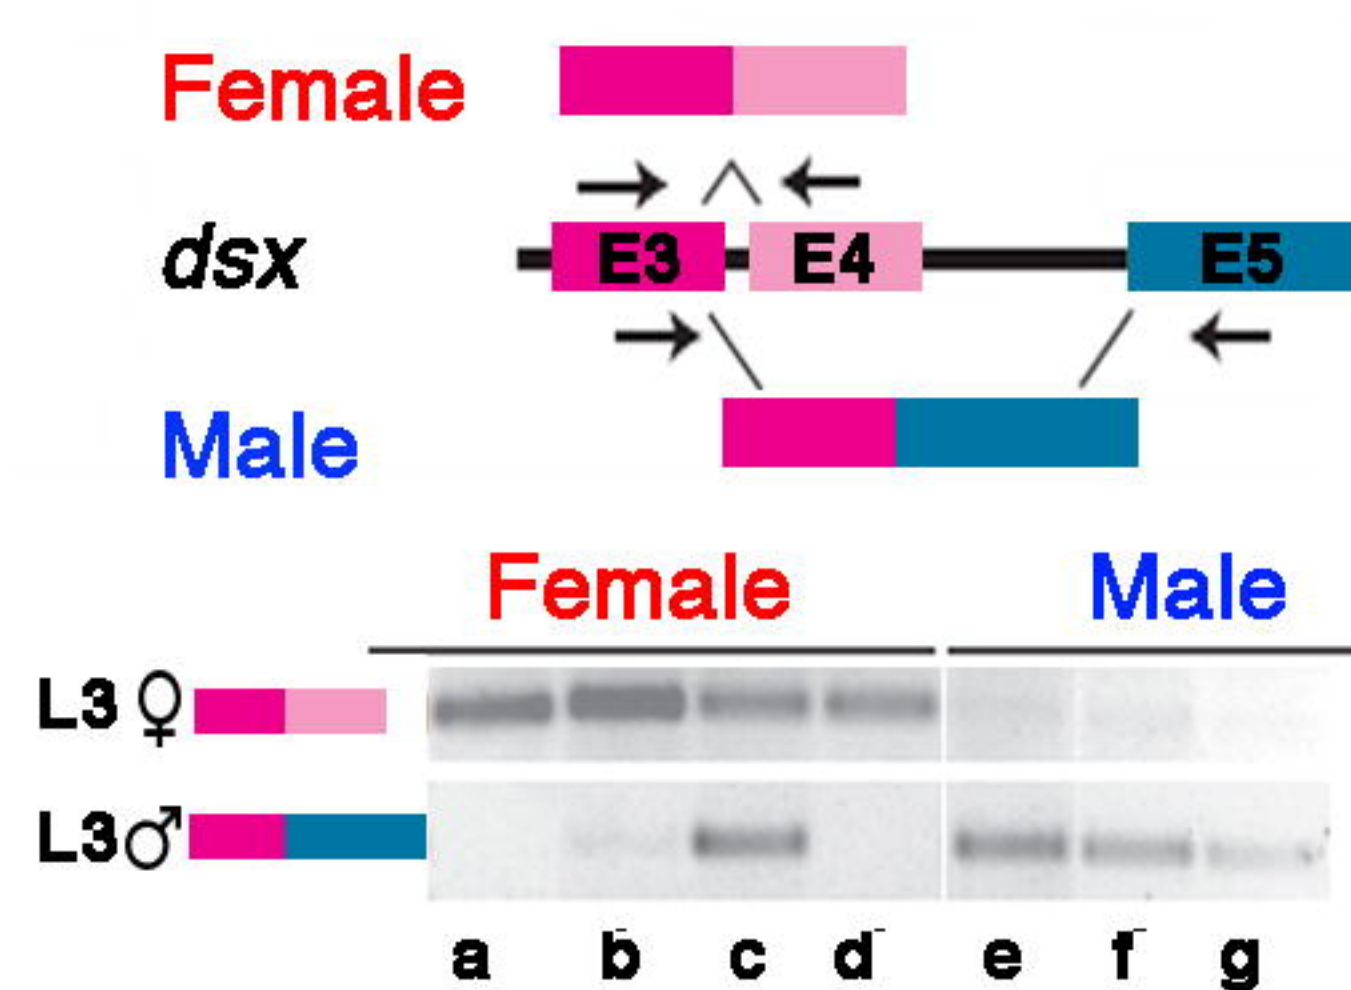

### H splicing *msl-2* transcripts

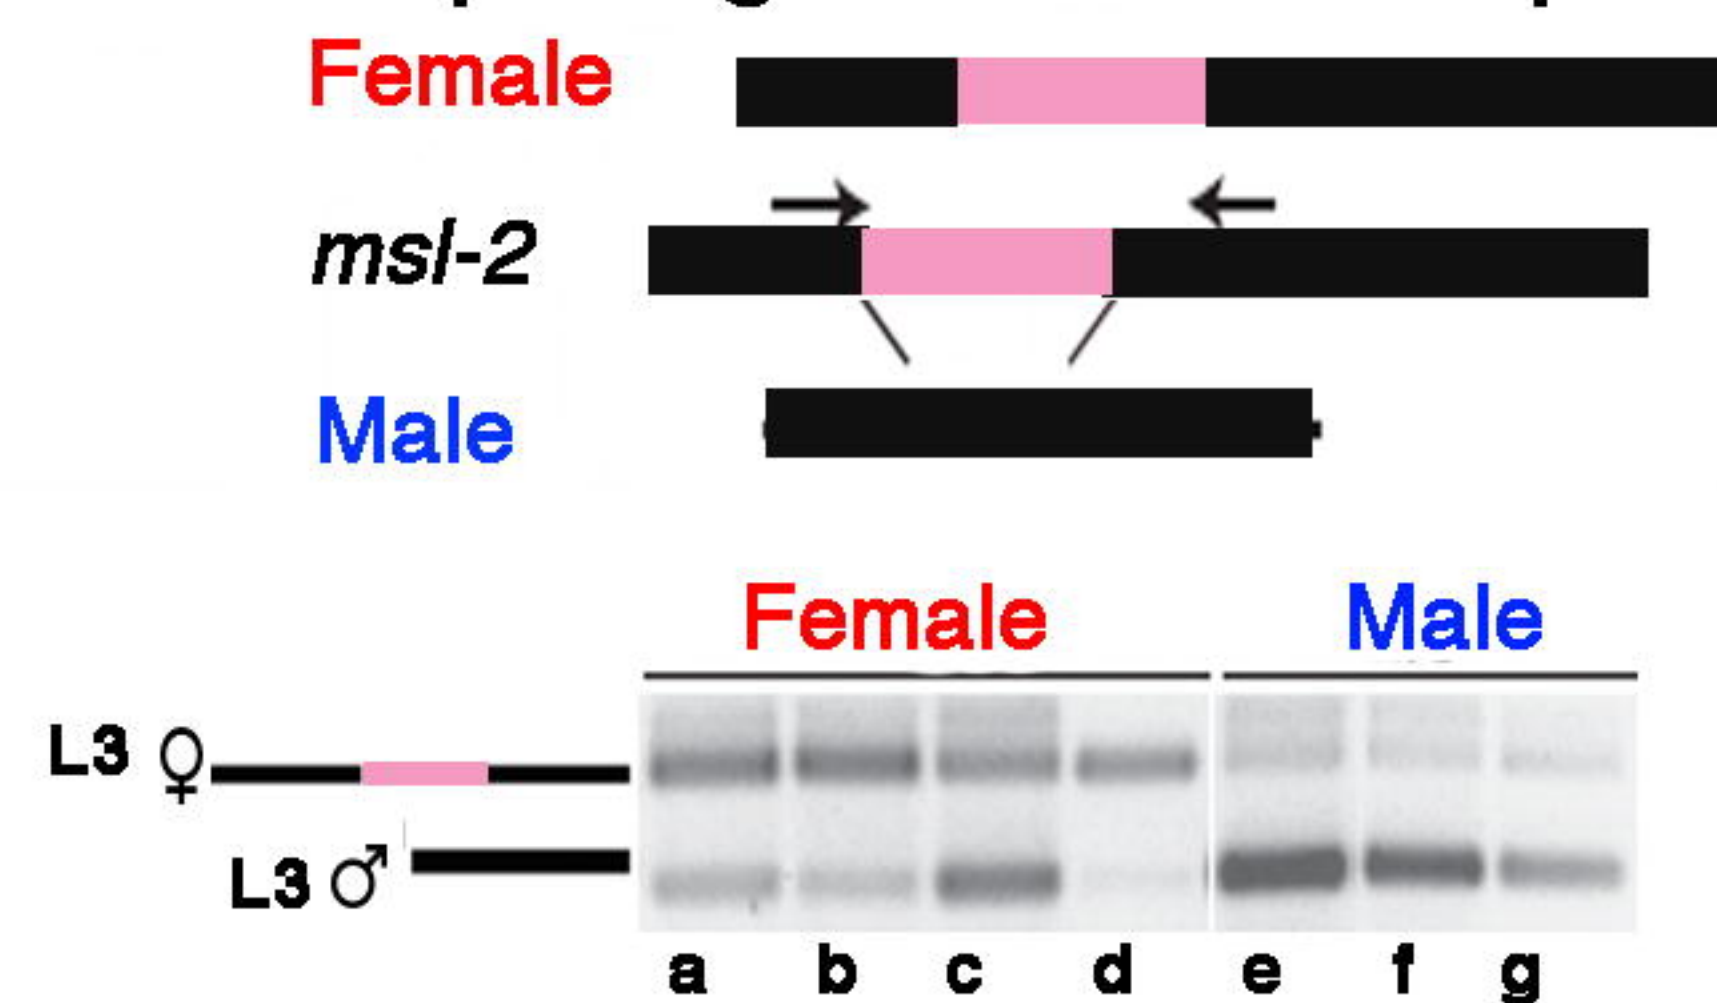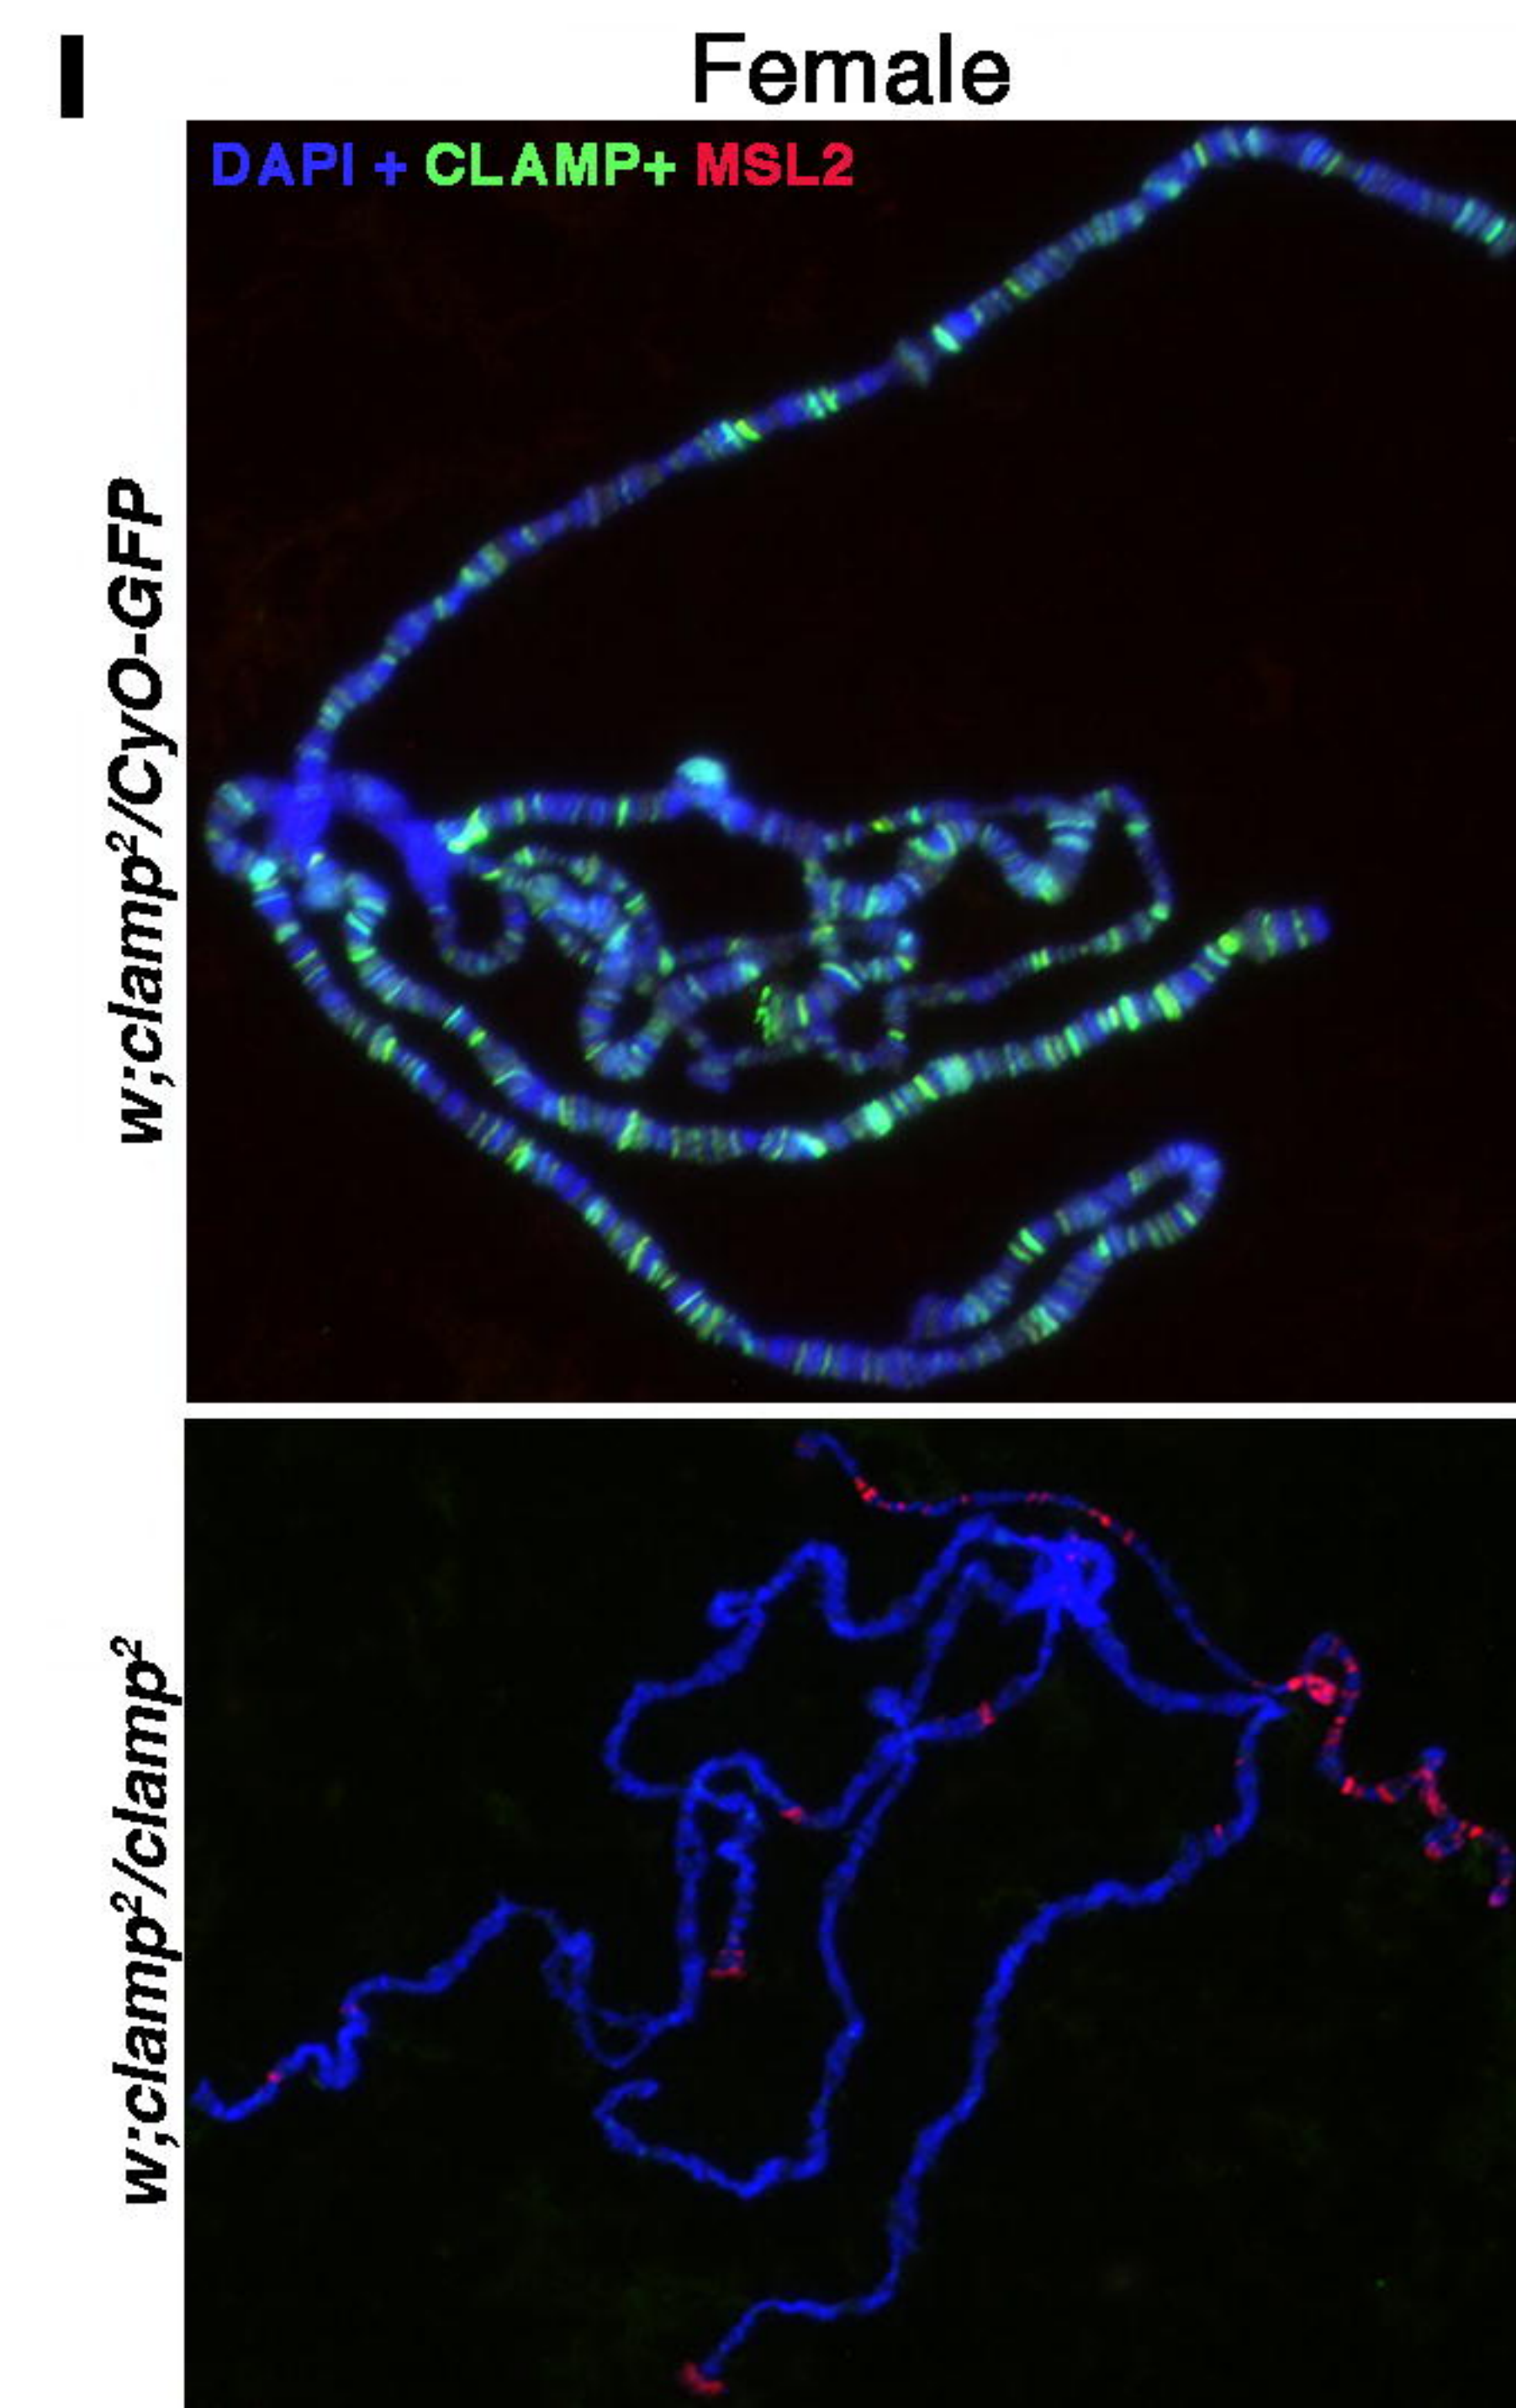



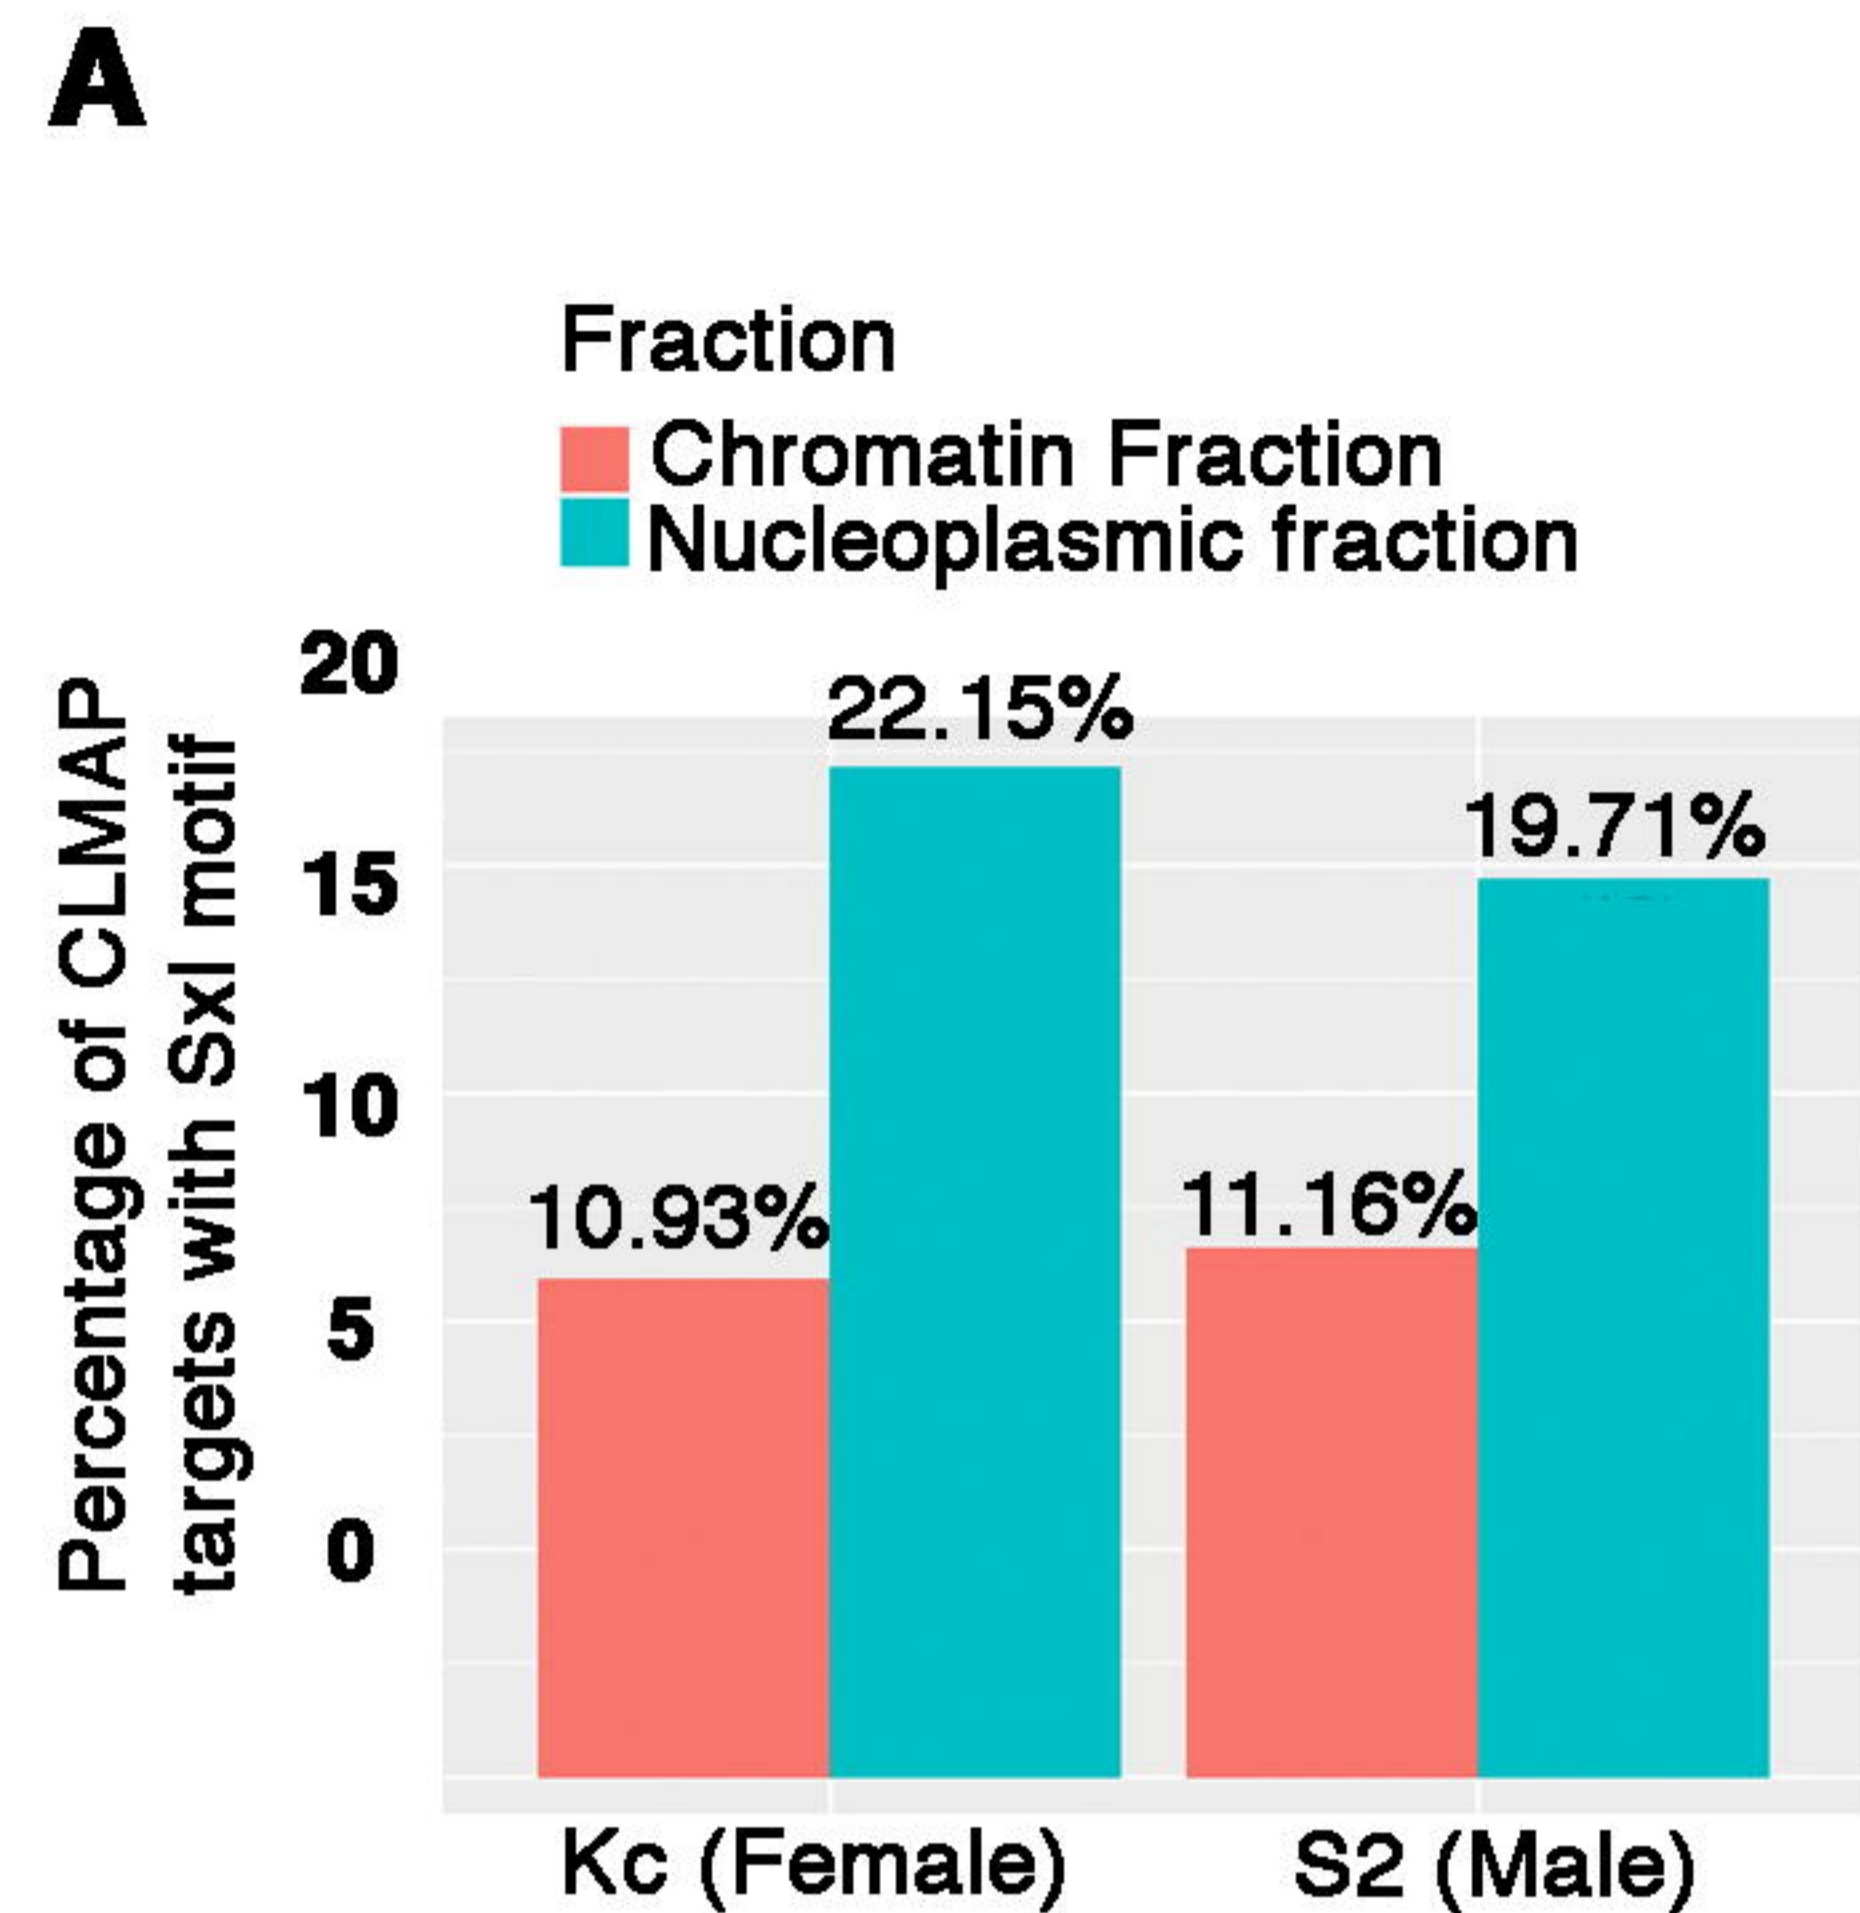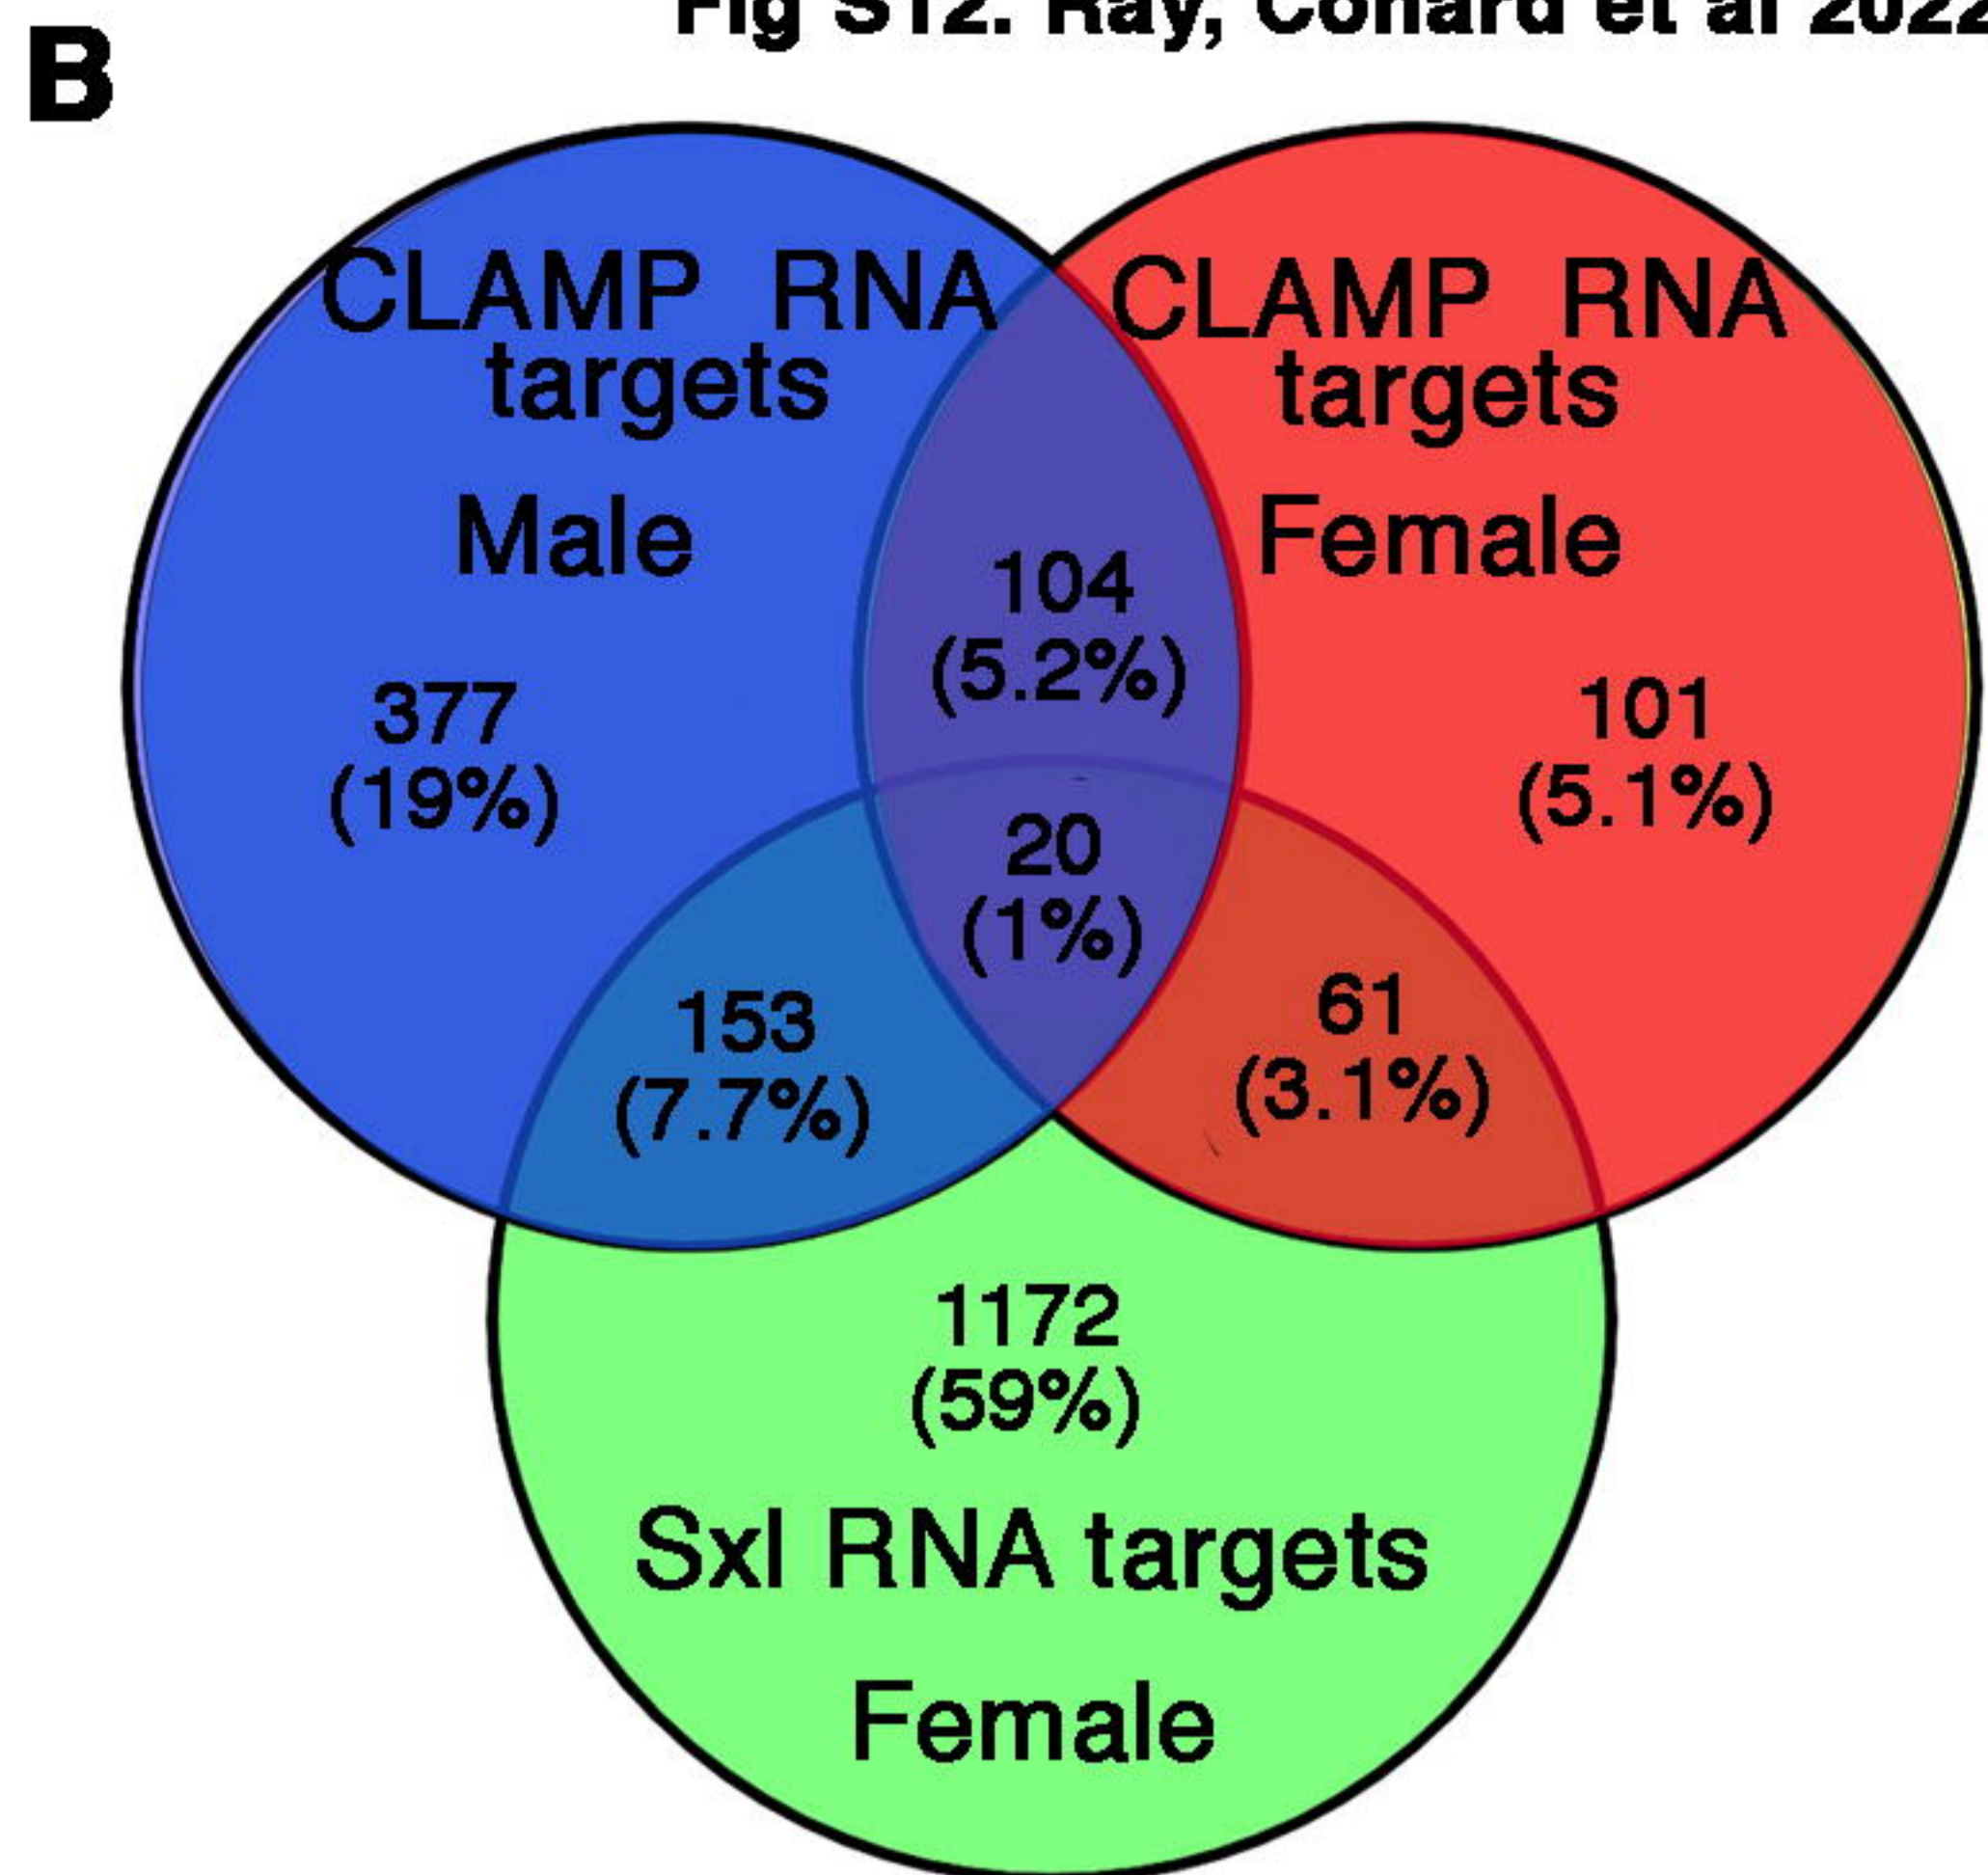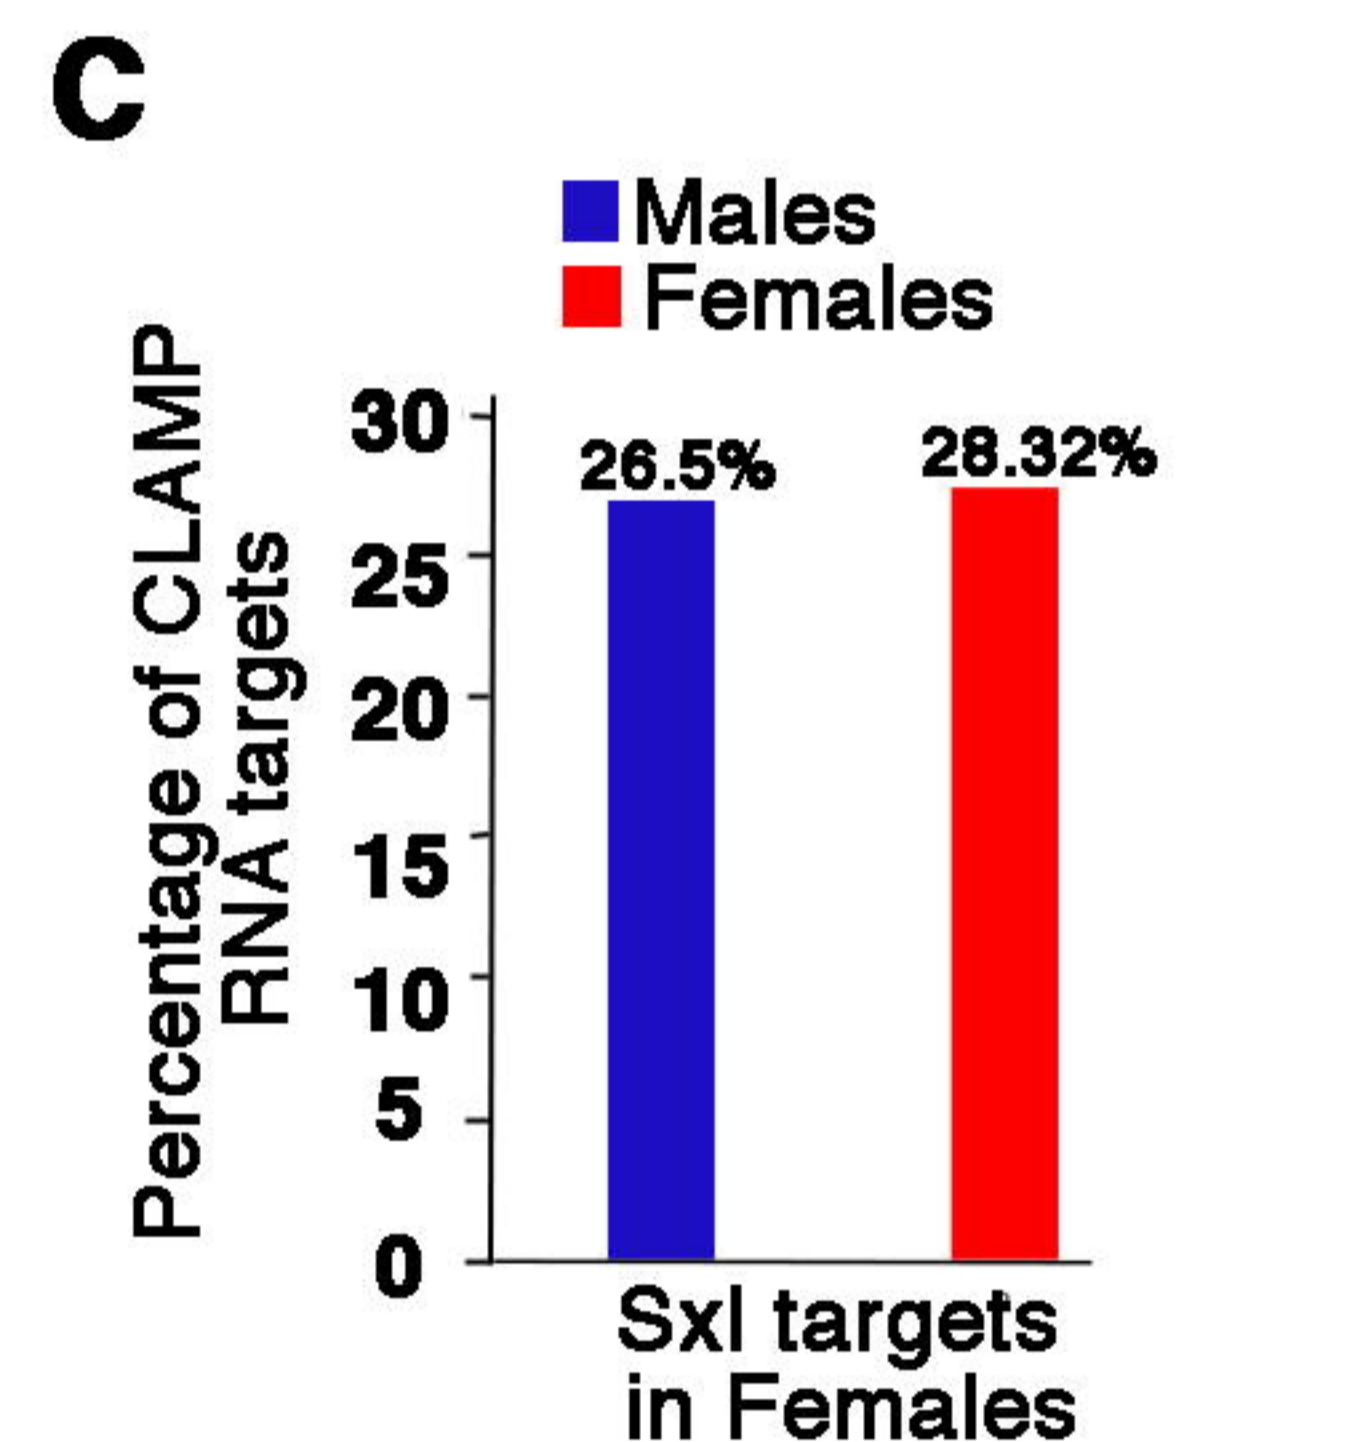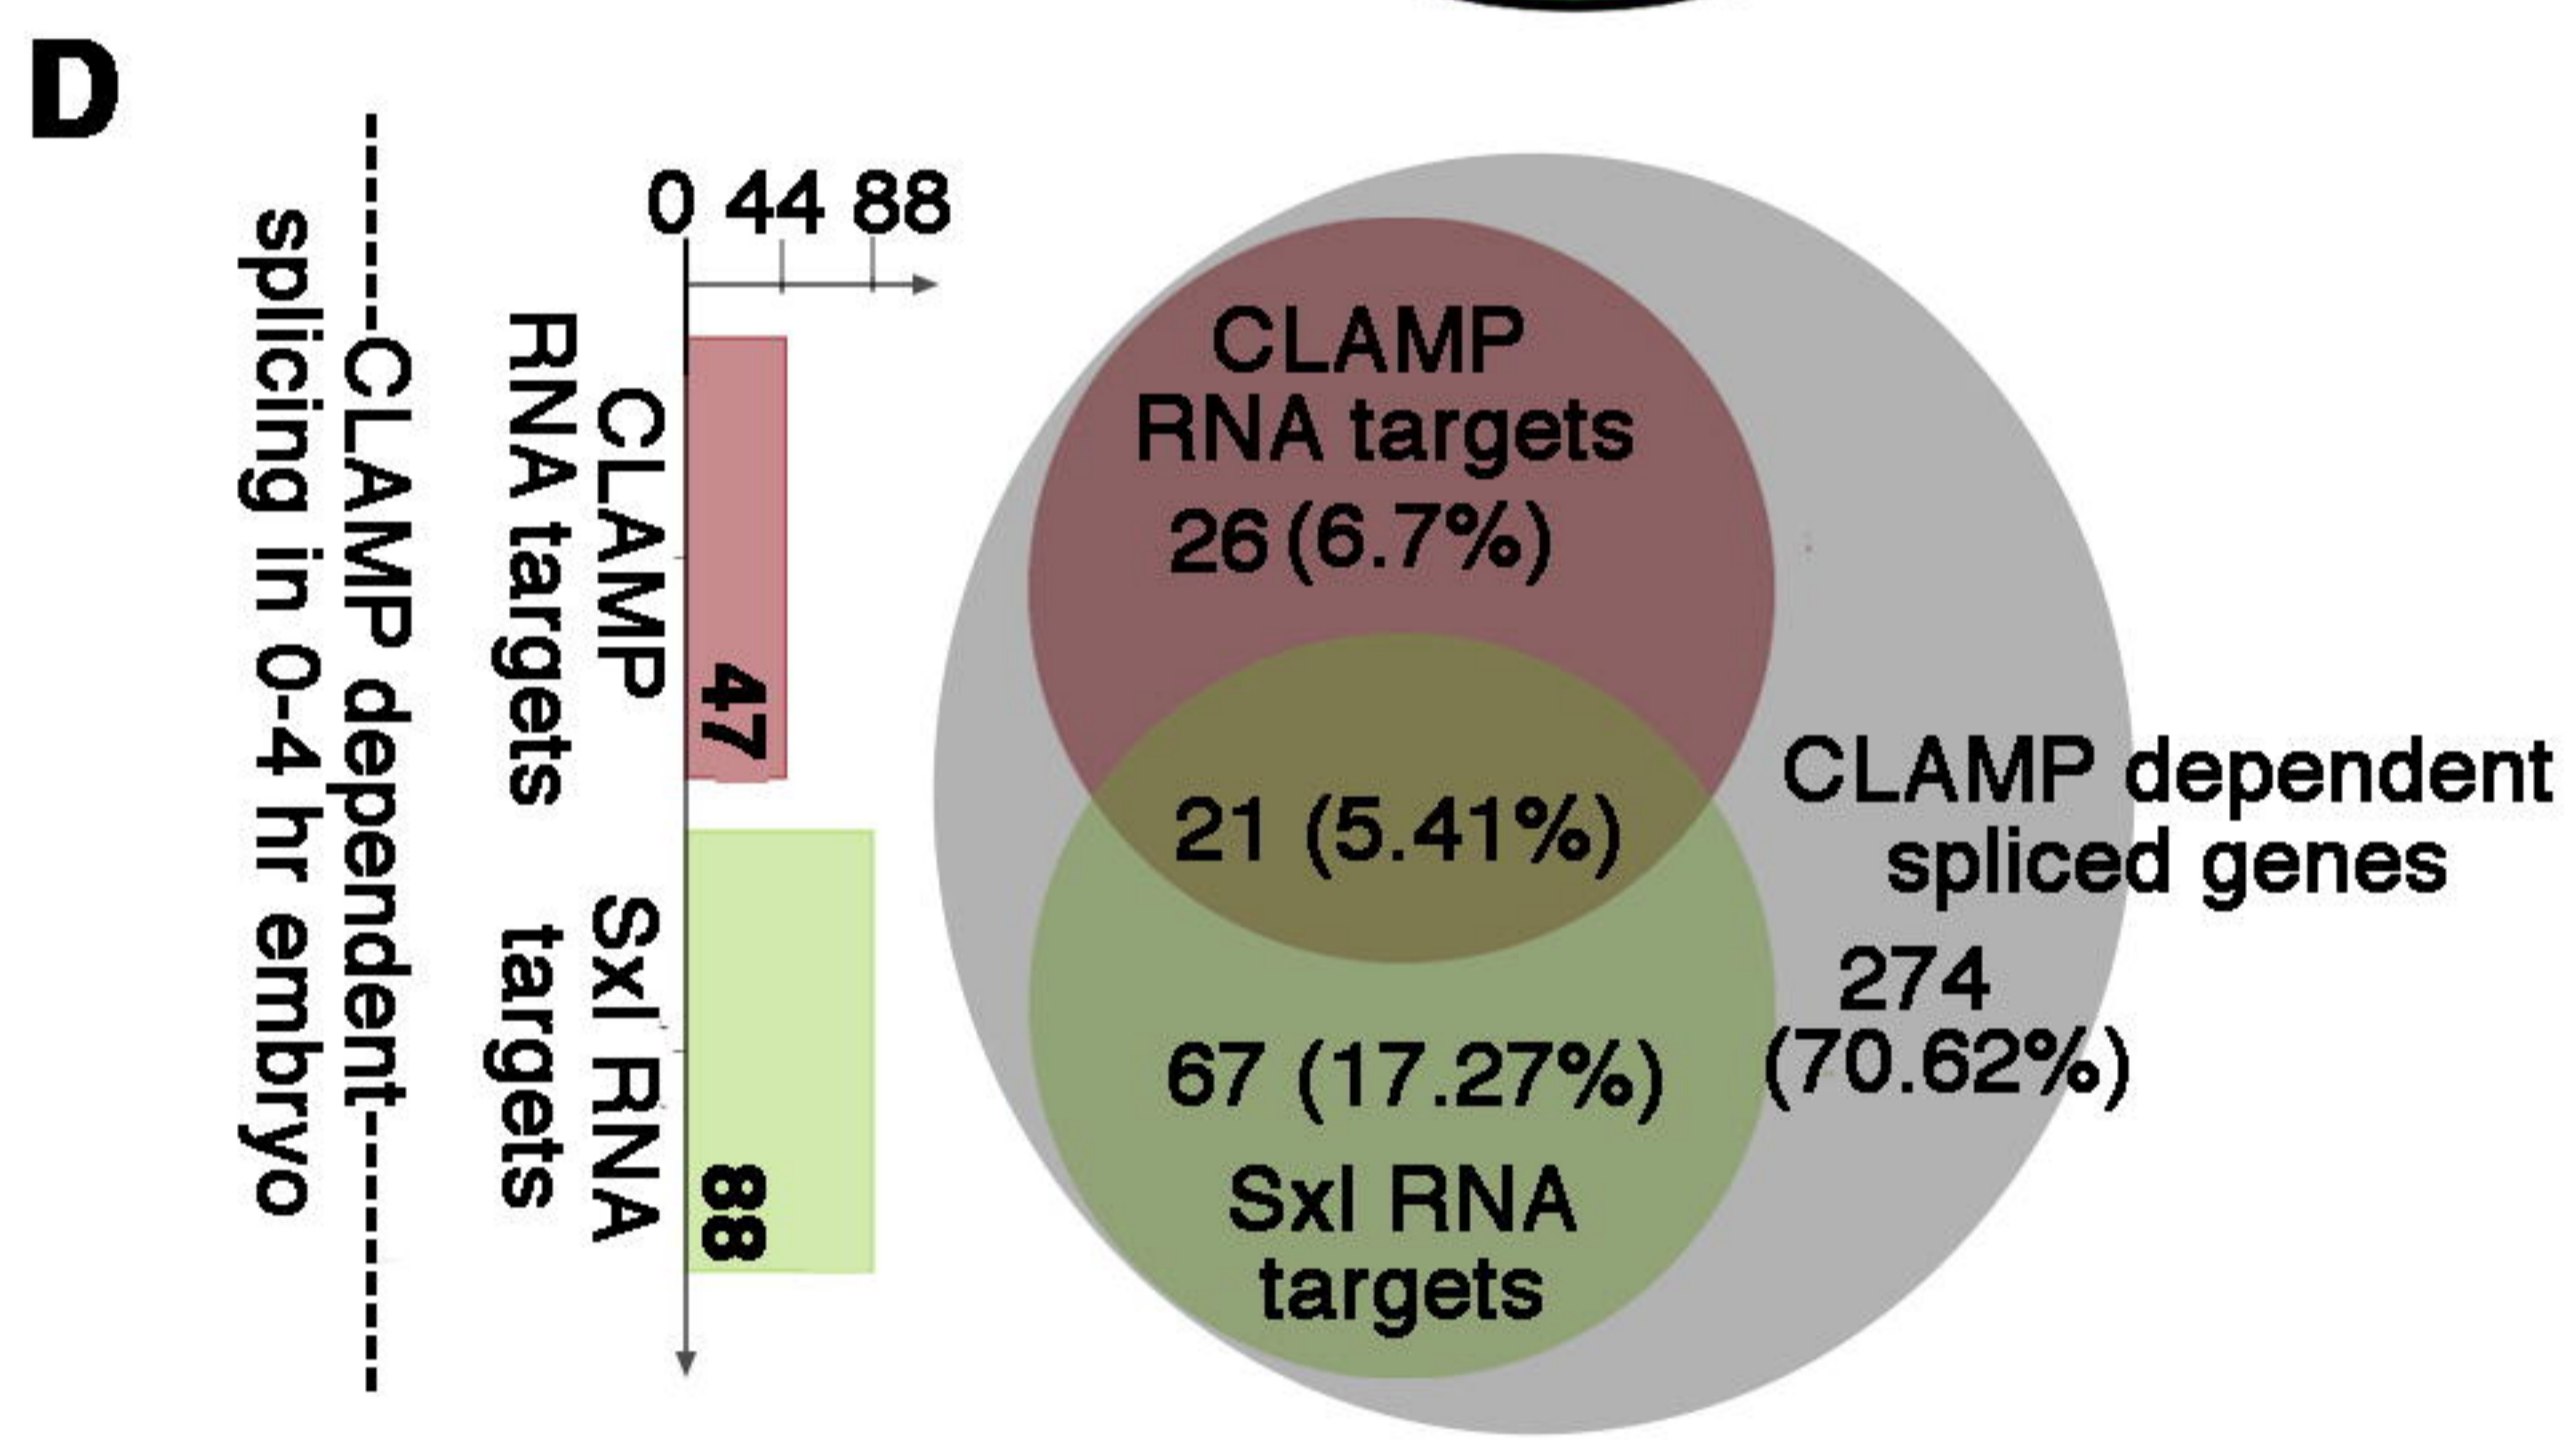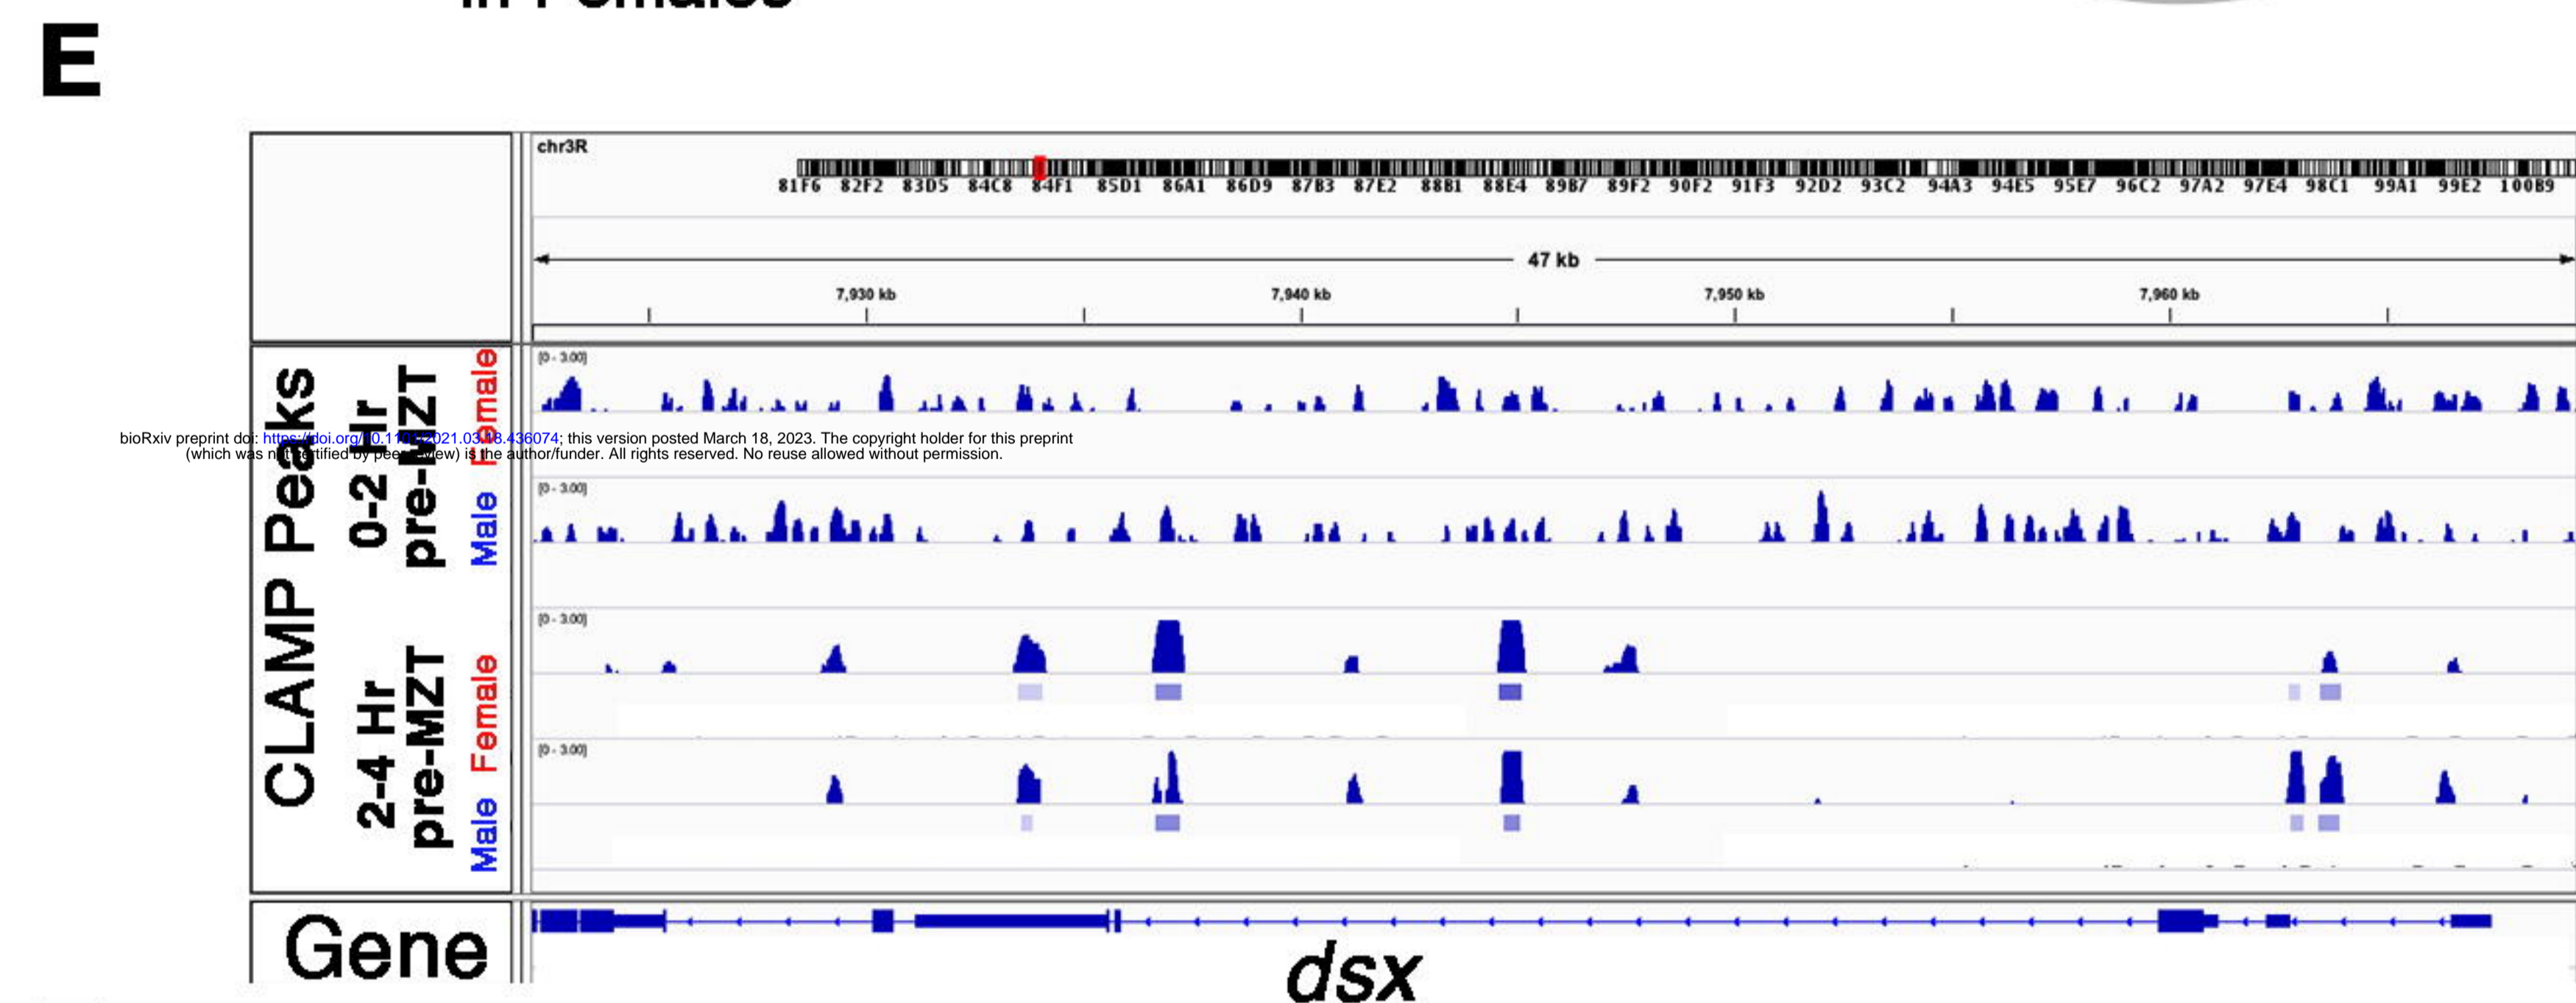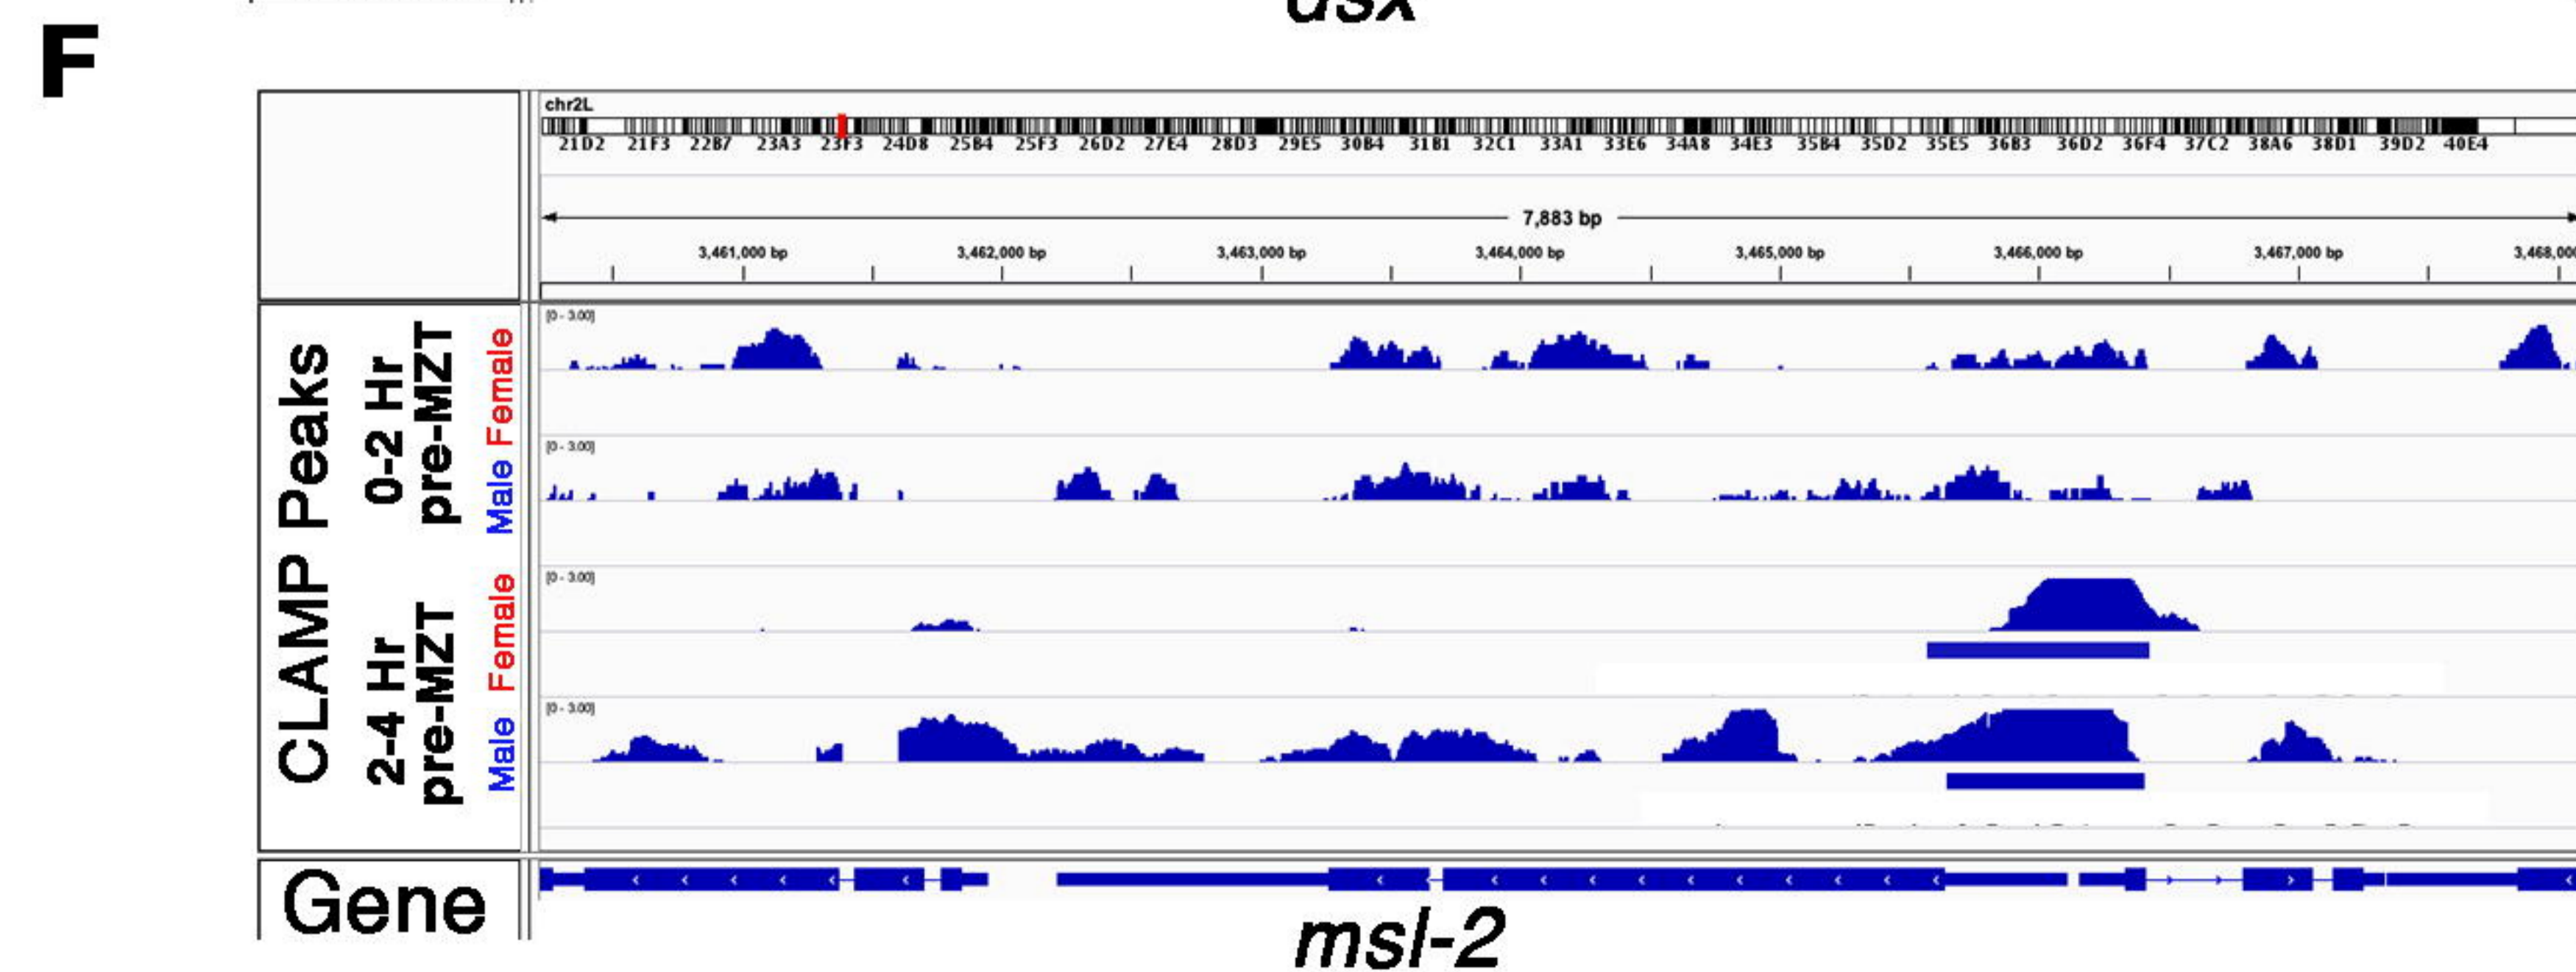

## Chromatin Fraction

## Kc/Female cells

## S2/Male cells

Percentage of CLAMP RNA targets with binding sites for RNA binding proteins involved in splicing

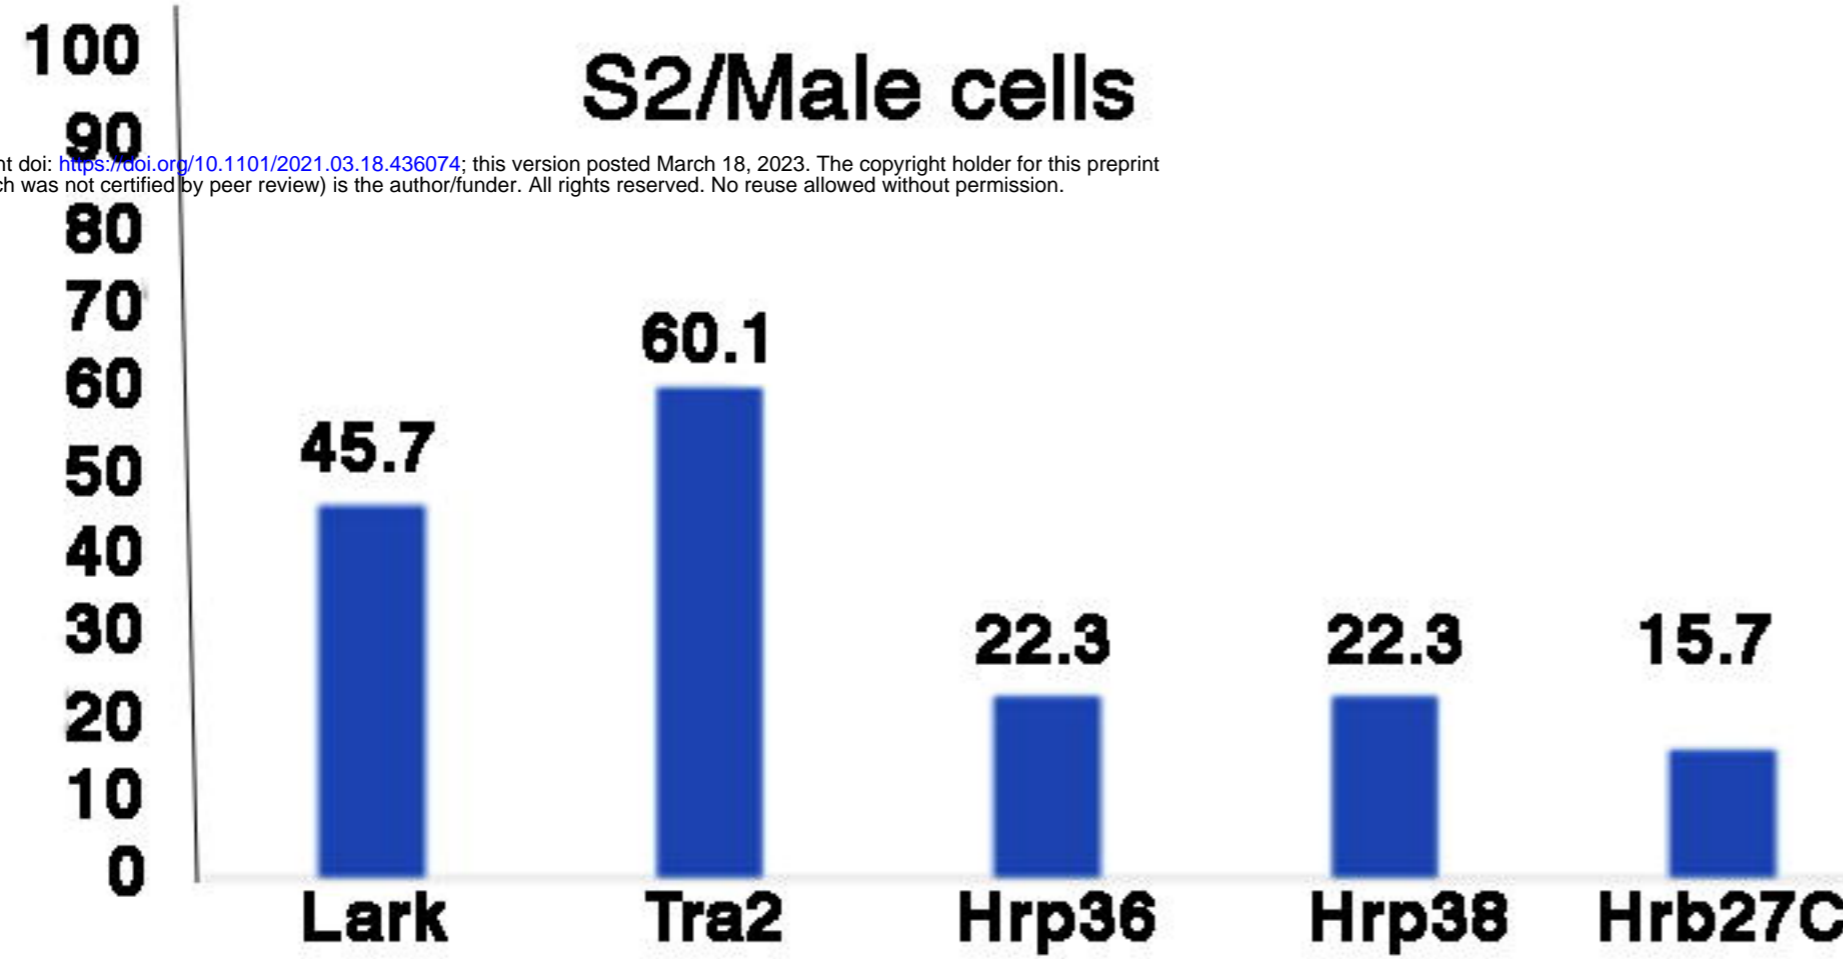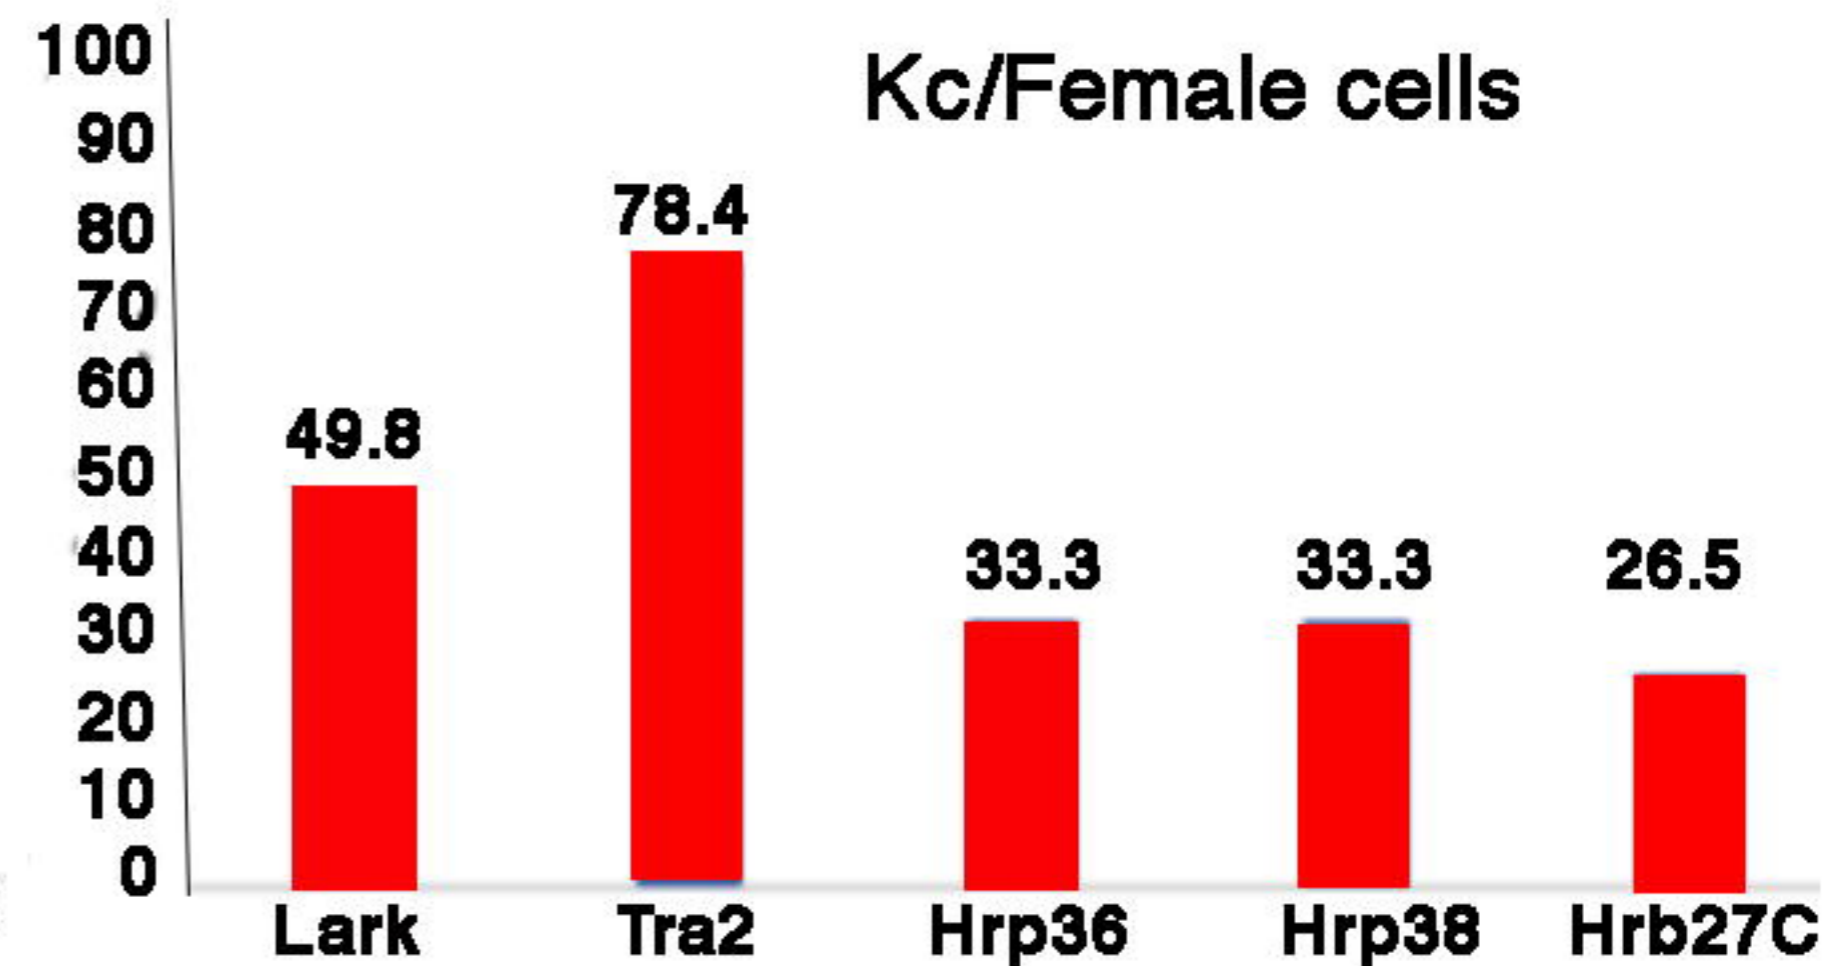

## Nucleoplasmic Fraction

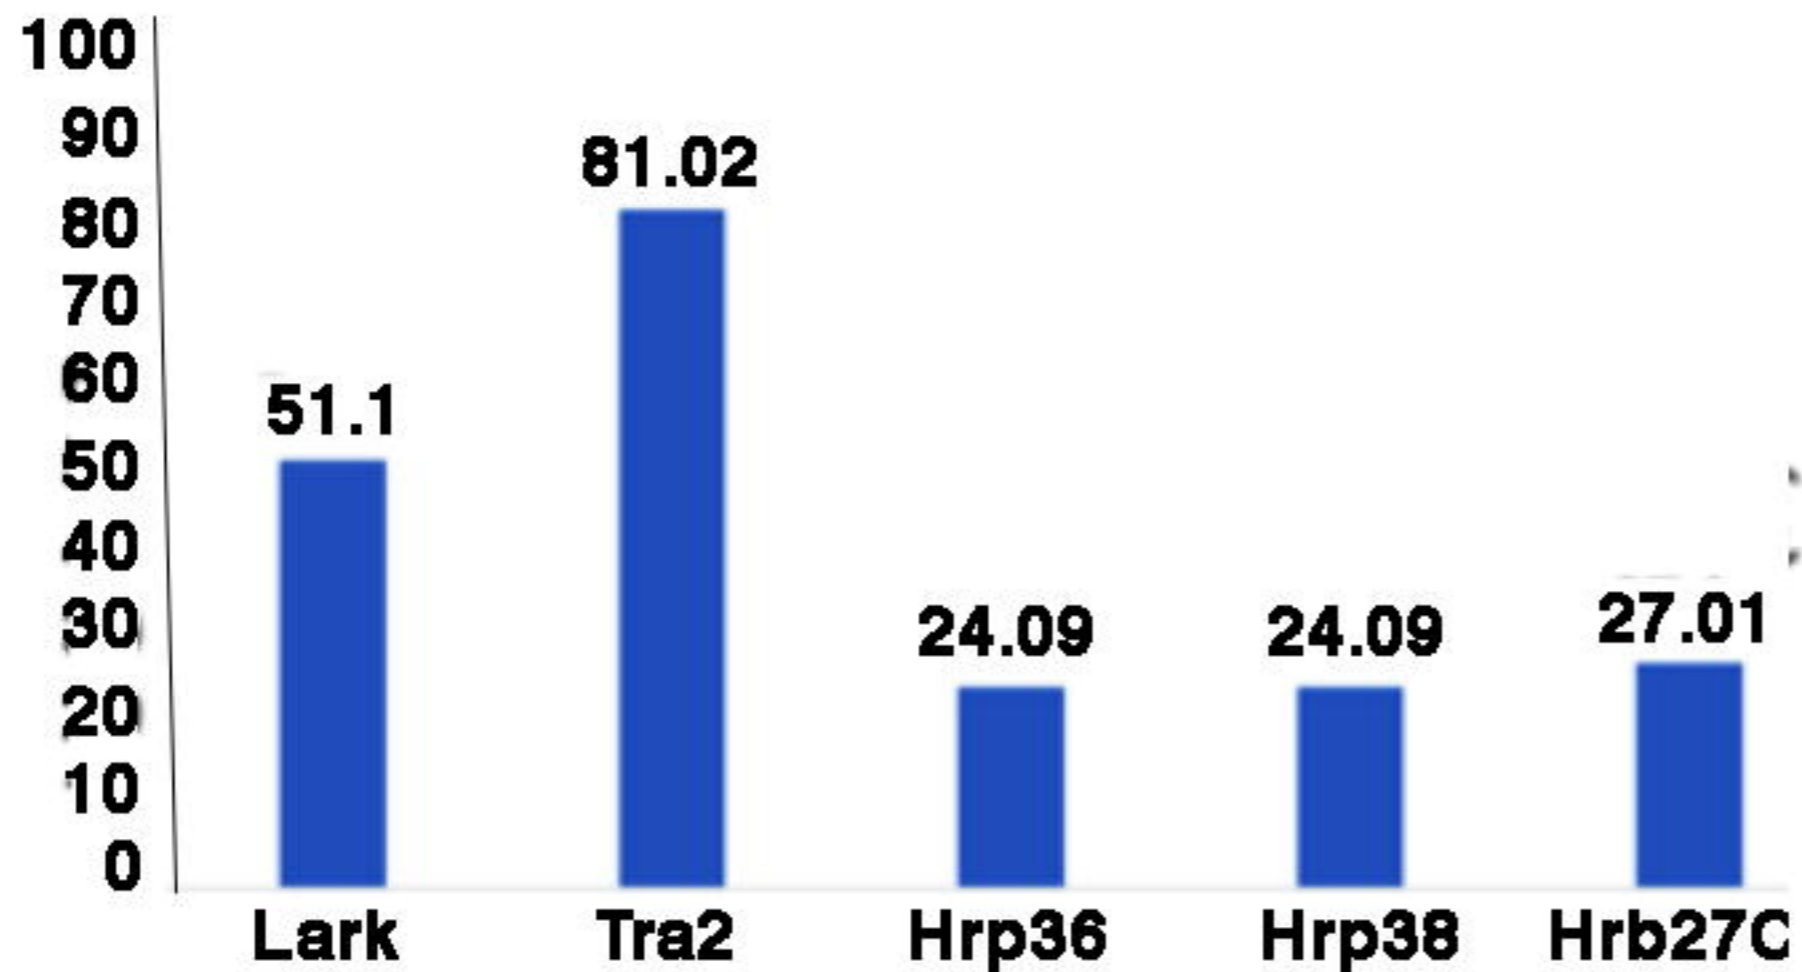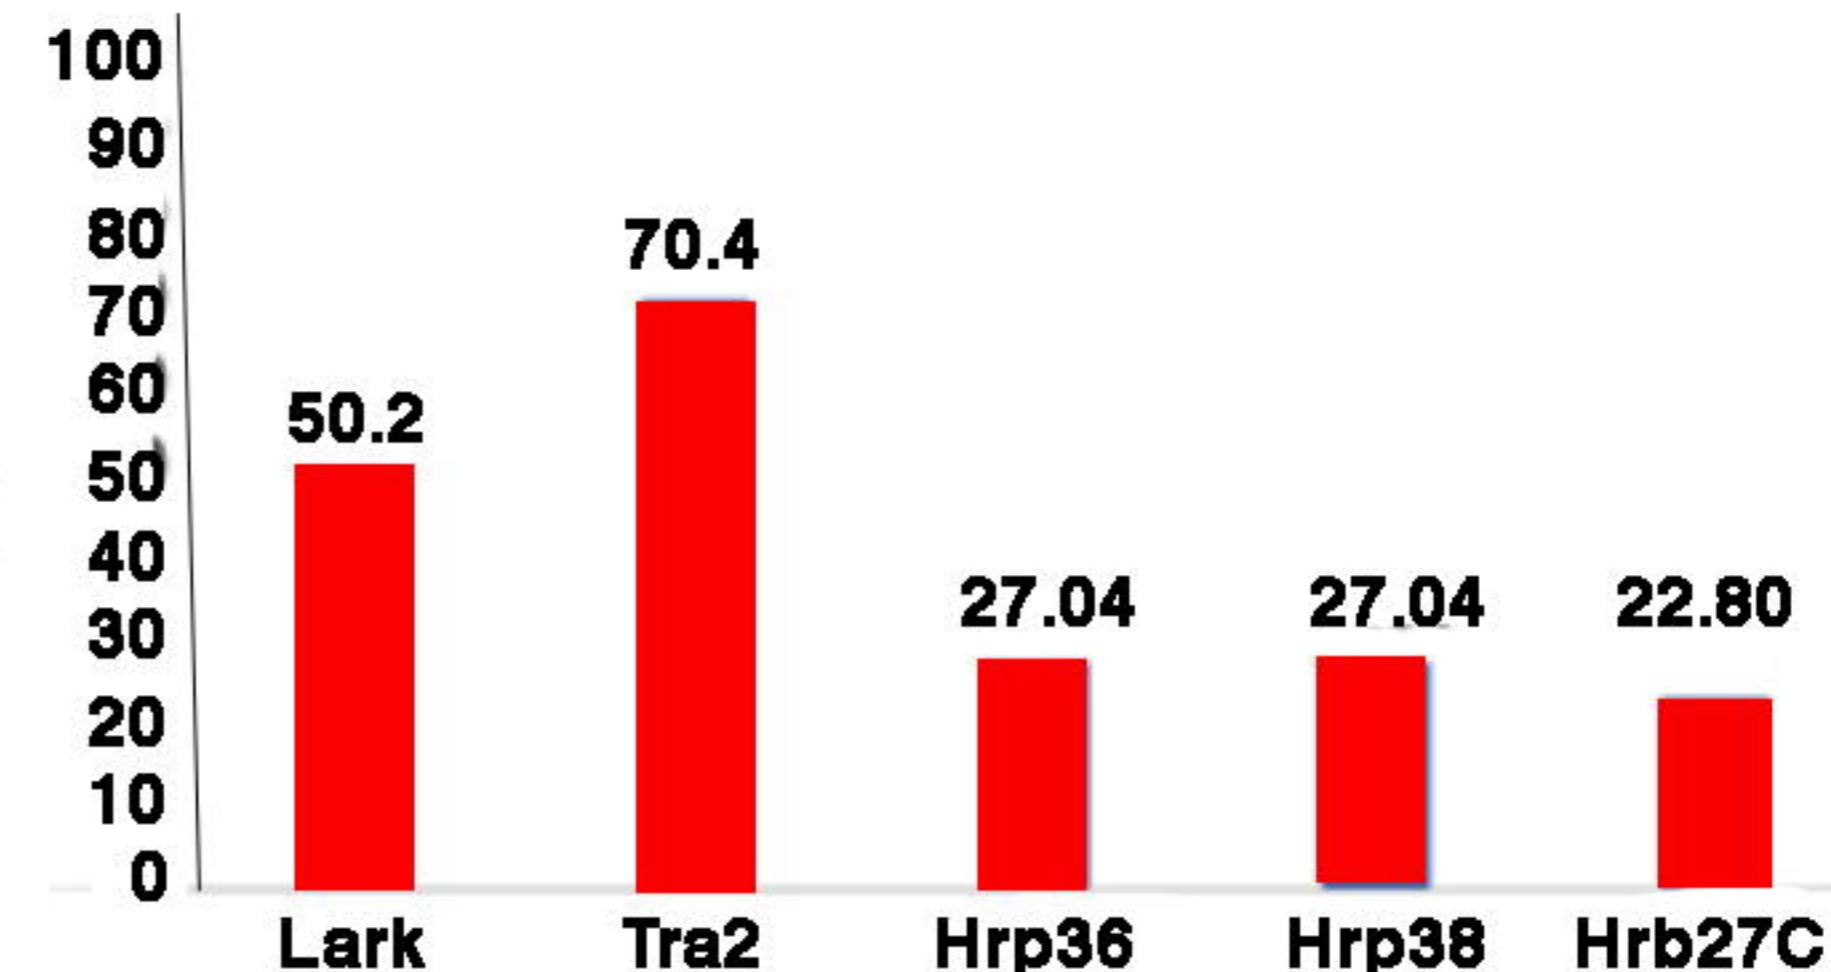

Source: http://biorxiv.org/content/10.1101/2021.03.18.436074v5.full.pdf
