1 **Sex-specific transcript diversity is regulated by a maternal pioneer factor in early *Drosophila***  
2 **embryos**

3 Mukulika Ray<sup>#Ω</sup>, Ashley Mae Conard<sup>ψΩ</sup>, Jennifer Urban<sup>ξ</sup>, Joseph Aguilera<sup>#</sup>, Annie Huang<sup>#</sup>, Erica  
4 Larschan<sup>#\*</sup>

5 \* Corresponding Author

6 <sup>Ω</sup> contributed equally

7 <sup>#</sup> MCB department, Brown University, Providence, RI, USA,

8 <sup>ψ</sup> CCMB department, Brown University, Providence, RI, USA

9 <sup>ξ</sup> Biology department, Johns Hopkins University, Baltimore, Maryland, USA

10

11

12 **Abstract**

13

14 Maternally deposited factors play a crucial role in initiating zygotic transcription. However, the  
15 mechanisms by which maternal factors regulate early zygotic transcript diversity through  
16 alternative splicing remain unclear. Furthermore, how early in development widespread sex-  
17 specific transcript diversity occurs is not known. We show that widespread sex-specific transcript  
18 diversity occurs much earlier than previously thought and present a new pipeline called time2splice  
19 to quantify splicing changes over time. Using the powerful *Drosophila* model, we define several  
20 mechanisms by which a maternal factor regulates sex-specific zygotic transcriptome diversity: 1)  
21 In both males and females, GA-binding pioneer factor CLAMP (Chromatin linked adapter for  
22 **MSL** proteins) links the DNA of gene bodies of sex-specifically spliced genes directly to the RNA  
23 of target genes and physically interacts with snRNA and protein components of the splicing  
24 machinery; 2) In males, CLAMP regulates the distribution of the spliceosome component **Maleless**  
25 (MLE) to prevent aberrant sex-specific splicing; 3) In females, CLAMP binds to the DNA and  
26 RNA encoded by the *sxl* gene, the master regulator of sex determination, to directly regulate its  
27 splicing which also modulates downstream targets. Overall, we provide key insight into how  
28 maternal factors influence sex-specific transcript diversity.

29

30

31

32

33

34

## 35 **Introduction**

36

37 One of the greatest challenges in modern biology is understanding the mechanism and significance  
38 of widespread transcript diversity between sexes and different developmental stages, tissues, and  
39 cell-types. **Alternative Splicing (AS)**, a mechanism of selective inclusion or exclusion of introns  
40 and exons, drives widespread transcript diversity<sup>1,2</sup>. In addition to basic development and  
41 physiology, transcriptome diversity is critical for disease biology, especially in neurodegenerative  
42 diseases and developmental disorders that often show sex or tissue-specific differences in  
43 progression and severity<sup>3-6</sup>. Across species, precise regulation of genes to produce specific splice  
44 variants is critical for all developmental decisions, including sex determination. A key to  
45 understanding how transcript diversity drives biological processes lies in the events that shape the  
46 initial few hours of an organism's existence.

47

48 During early development, protein and RNA deposited by the mother into the embryo shape early  
49 embryonic milestones across metazoans<sup>7,8</sup>. Initially, cell number increases, followed by cellular  
50 differentiation into specific cell types. Sexual identity is then established, driving the fundamental  
51 physiological differences between sexes. However, the mechanisms by which maternally  
52 deposited proteins and RNAs regulate this process of sexual differentiation remains poorly  
53 understood. Moreover, maternal factors are often essential regulators that can have a lasting impact  
54 on gene regulation later in the life of an organism. Thus, it is essential to define the influence of  
55 maternal factors on transcriptome diversity during the early stages of embryonic development.  
56 Therefore, the key question is: How do maternally deposited products regulate transcript diversity  
57 including sex-specific splice variants?

58

59 The *Drosophila* embryo is an excellent tool to study the role of maternally deposited proteins and  
60 RNA in early development as it is easy to perform genetic manipulation to remove maternal factors  
61 to define how they regulate splicing and transcription. Also, embryos can be sexed before zygotic  
62 genome activation due to the recent application of a meiotic drive system<sup>9</sup>.

63

64 During *Drosophila* embryogenesis, **Zygotic Genome Activation (ZGA)** occurs shortly after the  
65 first two hours of development. Concurrently, maternal transcripts gradually decrease in  
66 abundance, and zygotic transcription increases, a process called the **Maternal to Zygotic Transition**  
67 **(MZT)**. ZGA starts approximately 80 min after egg laying and most maternal transcripts are  
68 degraded by 180 min after egg laying<sup>10</sup>. Even at these early stages of development, AS generates  
69 multiple variants of the same gene transcripts resulting in transcript diversity. Although the earliest  
70 genes transcribed from the zygotic genome are mainly intron-less, almost 30% of early zygotic  
71 transcripts do have introns<sup>11,12</sup>. Furthermore, genes involved in sex determination use AS to drive  
72 male versus female-specific development<sup>13</sup>. Hence, during early embryonic development, AS is  
73 important for shaping cell and tissue-specific transcriptomes and sexual differentiation.

74  
75 The master regulator of *Drosophila* sex determination is the *sxl* gene, which undergoes alternative  
76 splicing such that exon three is retained in males but not in females<sup>14,15</sup>. Therefore, functional Sxl  
77 protein is made only in the female embryo. Early expression of the Sxl protein made from a  
78 transcript driven by Sxl<sub>Pe</sub>, an early *sxl* promoter<sup>16</sup>, autoregulates splicing of *sxl*. Next, the Sxl  
79 protein causes splicing of exon three from pre-mRNA of *sxl* transcripts initiated from the late  
80 maintenance promoter (Sxl<sub>Pm</sub>) specifically in females<sup>17,18</sup>. The early activation of the Sxl<sub>Pe</sub>  
81 promoter is regulated by a group of X-linked genes called X signal elements (XSE). A higher  
82 dosage of XSE gene products drives Sxl<sub>Pe</sub> expression in XX females and not XY males<sup>19</sup>.

83  
84 The Sxl protein is an RNA binding protein that binds to *sxl* pre-mRNA and the pre-mRNA of  
85 downstream target genes such as *transformer (tra)* and *male-specific lethal protein 2 (msl-2)* to  
86 regulate their splicing and stability, giving rise to female-specific splice variants<sup>20</sup>. The female-  
87 specific Tra isoform then regulates sex-specific splicing of the *doublesex (dsx)* gene resulting in  
88 different Dsx protein isoforms in females and males which directly regulate sexual dimorphism in  
89 both sexes<sup>14,15</sup>.

90  
91 Sxl regulation of *msl-2* RNA splicing and stability links the sex determination pathway to another  
92 important early embryonic event: dosage compensation, which equalizes gene dosage of X-linked  
93 genes between females with two X-chromosome and males with a single X-chromosome. MSL-2  
94 is an essential core component of the MSL complex, present only in the male embryo and

95 responsible for dosage compensation<sup>21,22</sup>. The binding of the Sxl protein to the *msl-2* transcript  
96 specifically in females results in skipping of the first exon, thereby hindering translation of the  
97 protein and preventing MSL complex formation in females<sup>23</sup>.

98  
99 Once formed specifically in males, the MSL complex targets the male X-chromosome at high-  
100 affinity binding sequences called Chromatin Entry Sites (CES) that are enriched for clustered long  
101 GA-repeat sequences<sup>24,25</sup>. The maternally deposited Chromatin linked adapter for MSL proteins  
102 (CLAMP) opens chromatin<sup>26,27</sup> and directly contacts MSL-2<sup>28</sup> to promote MSL complex  
103 recruitment. Subsequently, the MSL complex increases transcript levels on the male X-  
104 chromosome by promoting transcription elongation<sup>29</sup>. Interestingly, the MSL complex shares a  
105 key highly conserved component MLE (RNA helicase A) with the spliceosome complex<sup>30-32</sup>,  
106 suggesting that there is likely to be an interplay between dosage compensation and splicing that  
107 has not yet been defined.

108  
109 CLAMP is an essential pioneer Transcription Factor (TF) that opens chromatin<sup>26,27</sup>. Loss of  
110 CLAMP results in complete loss of MSL complex from the male X-chromosome causing male  
111 lethality<sup>33</sup>. Unlike MSL complex component mutants, which cause only male-specific lethality,  
112 *clamp* mutants are lethal in both males and females early in embryogenesis after losing maternal  
113 CLAMP<sup>27</sup>. Several lines of evidence lead us to hypothesize that CLAMP regulates alternative  
114 splicing: 1) CLAMP is bound to both intronic and promoter regions on chromatin<sup>34</sup>, 2) Intronic  
115 regions are rich in polypyrimidine tracts, which have similar GA-rich sequences to CES and often  
116 contain CLAMP binding sites<sup>35</sup>, 3) GA-rich repeat sequences within CES are thought to have  
117 evolved from polypyrimidine tracks that regulate splicing<sup>35</sup>, and 4) MALDI-mass spectrometry  
118 data identifying putative CLAMP interactors identified association with 33 RNA binding proteins,  
119 including 6 that regulate alternative splicing<sup>36</sup>. Therefore, we hypothesized that CLAMP is a  
120 maternally deposited factor that shapes transcriptome diversity in early embryos by regulating  
121 RNA transcript splicing.

122  
123 To date, there are no reports defining alternative splicing globally in early *Drosophila*  
124 *melanogaster* sexed embryos. Moreover, how maternal TFs regulate alternative splicing in any  
125 organism is not known. Here, we determine that 16-18% of transcripts undergo alternative splicing

126 during the first four hours of development in *Drosophila melanogaster* embryos. Although sex-  
127 specific isoforms have been identified for several candidate genes in early development<sup>37-40</sup>, a  
128 comprehensive analysis of all sex-specific isoforms forms has not yet been performed in early  
129 embryos and is only available in fully developed tissues like ovaries, testis and brain<sup>38,41</sup>.  
130 Therefore, we used a meiotic drive system to sex embryos and measured total AS and sex-specific  
131 splicing genome-wide before (0-2 Hrs) and after (2-4 Hrs) the major wave of MZT. For ease of  
132 understanding, we have defined 0-2 Hr embryos as pre-MZT and 2-4 Hr embryos as post-MZT  
133 even though a small number of early zygotic genes are activated during the 0-2 Hr time period.

134  
135 To reveal new mechanisms by which maternal factors shape early embryonic transcriptome  
136 diversity, we have focused on analyzing how the maternal transcription factor CLAMP regulates  
137 sex-specific alternative splicing during the first few hours of development. We have identified  
138 male-specific and female-specific genes whose splicing requires maternal CLAMP and are  
139 important regulators of early development with diverse functions form including chromatin  
140 regulation and splicing.

141  
142 Moreover, we defined multiple mechanisms by which sex-specific transcript diversity is regulated  
143 during early embryonic development: 1) In both males and females, CLAMP links the DNA of  
144 gene bodies of sex-specifically spliced genes directly to the RNA of target genes and physically  
145 interacts with U1-U6snRNAs and protein components of the splicing machinery; 2) In males,  
146 CLAMP regulates the distribution of the spliceosome component **Maleless** (MLE) to prevent  
147 aberrant sex-specific splicing; 3) In females, CLAMP binds to the DNA and RNA encoded by the  
148 *sxl* gene, the master regulator of sex determination, to directly regulate its splicing which also  
149 modulates downstream targets. Overall, we demonstrate that sex-specific transcriptome variation  
150 is established very early in development and is regulated by maternally deposited CLAMP via  
151 diverse mechanisms including direct binding to the spliceosome and the DNA and RNA of sex-  
152 specifically spliced genes.

153  
154  
155  
156

157 **Results**

158

159 **1. Alternative splicing plays an essential role in shaping the early embryonic transcriptome.**

160

161 To determine when during early *Drosophila melanogaster* development sex-specific splicing  
162 begins, we analyzed RNA-sequencing data generated from sexed embryos at two-time points: 1)  
163 0-2 Hrs (pre-MZT); 2) 2-4 Hrs (post-MZT)<sup>9</sup> (#GSE102922). Embryos were sexed using a meiotic  
164 drive system that produces sperm with either only X or only Y chromosomes<sup>9</sup>, resulting in progeny  
165 of either only female or only male genotypes. Next, we measured the amount of AS in early  
166 *Drosophila* development using a pipeline that we developed and made publicly available called  
167 time2Splice (<https://github.com/ashleymaeconard/time2splice>). Time2Splice implements the  
168 commonly used SUPPA2 algorithm to identify splice variants and provides additional modules to  
169 integrate time, sex, and chromatin localization data (See **Supplemental method**) (Fig S1).  
170 SUPPA2 measures the percent spliced in (PSI) for each exon to calculate the differential alternative  
171 splicing between samples, represented as  $\Delta\text{PSI}^{42}$ .

172

173 AS events can be classified into seven categories: 1) Alternative Last Exon (AL); 2) Skipping  
174 Exon (SE); 3) Alternative 5' Splice Site (A5SS); 4) Alternative 3' Splice Site (A3SS); 5) Mutually  
175 Exclusive Exon (MXE) 6) Retained Intron (RI) and 7) Alternative First Exon (AF) (**Fig1A**). We  
176 measured the total number of splicing events that belong to each of the seven different categories  
177 at the 0-2 Hr and 2-4 Hr embryonic stages in both female and male embryos. We found that 16-  
178 18% of total transcripts are alternatively spliced in early embryos. **Alternative First Exon (AF)** is  
179 the most common type of alternative splicing, constituting almost one-fourth of total AS. In  
180 contrast, **Alternative Last Exon (AL)** is the least common alternative splice type. The AS transcript  
181 distribution across categories was similar between the two time points and sexes (**Fig 1B**).

182

183 We hypothesized that CLAMP regulates AS in early embryos for the following reasons: 1)  
184 CLAMP is a maternally deposited pioneer factor enriched at intronic regions ; 2) Proteomic data  
185 identified a physical association between spliceosome components and CLAMP<sup>36</sup>; 3) CLAMP  
186 binding sites evolved from polypyrimidine tracts that regulate splicing<sup>35</sup>. We tested our hypothesis  
187 in early staged and sexed embryos by measuring differences in splicing in RNA-sequencing data

188 generated from male and female 0-2 Hr and 2-4 Hr (pre- and post-MZT) embryos with and without  
189 maternal CLAMP<sup>9</sup>. The maternal triple driver GAL4, *MTD-GAL4* was used to drive *UAS-*  
190 *CLAMP RNAi[val22]* that strongly reduce maternal CLAMP levels, validated by qPCR and  
191 Western blot <sup>9</sup>.

192  
193 First, we asked whether CLAMP alters AS and we found 200-400 transcripts where AS is regulated  
194 by CLAMP depending on the time point and sex (**Fig 2A, B** and **Fig S2B, C, D, E**). Next, we  
195 asked which type of alternative splicing is most affected by depleting CLAMP. The overall  
196 distribution of AS transcripts into the seven splicing types remains mostly unaffected in the  
197 absence of maternal CLAMP. However, at the 0-2 Hr (pre-MZT) stage, loss of maternal CLAMP  
198 results in a more substantial decrease in **Mutually Exclusive Exon (MXE)** splicing in both males  
199 and females compared with all of the other types of splicing (males: p-value < 3.21e-21; females:  
200 p-value < 6.26e-87 chi-squared test) (**Fig 1B**). At the 2-4 Hr (post-MZT) stage, only male embryos  
201 have a significant percentage of MXE splicing affected in the absence of maternal CLAMP (p-  
202 value < 1.95e-137 chi-squared test) (**Fig 1B**). Therefore, CLAMP alters AS and has a stronger  
203 effect on MXE splicing than other types of splicing.

204  
205 During MXE splicing one isoform of the transcript retains one of the alternative exons and  
206 excludes another exon, which is retained by another isoform (schematic **Fig 1A**). Interestingly,  
207 MXE alternative splicing occurs in many transcripts that encode components of the sex  
208 determination pathway<sup>43</sup>. Sex determination pathway components undergo MXE alternative  
209 splicing that regulates translation and influences the splicing of downstream genes to drive  
210 transcriptome variation and sexual dimorphism. Furthermore, CLAMP has a sex-specific role in  
211 dosage compensation<sup>21,44</sup>. Therefore, we next asked whether CLAMP regulates sex-specific  
212 splicing.

213  
214 **2. Maternal CLAMP regulates sex-specific alternative splicing in early *Drosophila* embryos**

215  
216 To determine whether CLAMP-dependent alternative splicing events are enriched for sex-specific  
217 splicing (SSS) events, we first identified all of the transcripts undergoing female and male sex-  
218 specific splicing (**Fig S2A, D**) (Supplementary **Method**). We measured alternative splicing using

219 an exon-centric approach to quantify individual splice junctions by measuring percent spliced in  
220 (PSI) for a particular exon using the established SUPPA algorithm within the time2splice  
221 pipeline<sup>42</sup>. Exon inclusion is represented as positive PSI, and exclusion events are defined as  
222 negative PSI (equation in **Supplementary Method**). In this way, we identified sex-specific  
223 splicing events (**Fig S2A, D**) and CLAMP-dependent splicing events (**Fig S2B-C, E-F**) in female  
224 and male 0-2 Hr and 2-4 Hr embryos. We did not see any statistically significant enrichment for  
225 MXE within the CLAMP-dependent sex-specifically spliced events (see **Supplementary Table**  
226 **S1**). Although we found substantial evidence of CLAMP-dependent sex-specific splicing, we think  
227 the gene list is likely to be too small to determine significance for a particular class of splicing  
228 event.

229  
230 Next, we measured the percentage of total alternatively spliced and sex-specifically spliced  
231 transcripts that are CLAMP-dependent in males and females at both pre- and post-MZT stages.  
232 While only 2-3% of total AS is CLAMP-dependent, ~30-60% of sex-specific splicing is CLAMP-  
233 dependent (**Fig 2A**). Therefore, CLAMP regulates sex-specific splicing more strongly than total  
234 AS. Overall, more genes show CLAMP-dependent splicing in females (~150-250) than males  
235 (~100) (**Fig 2B and Supplementary Table S1**). However, the magnitude of the effect of CLAMP  
236 on splicing was stronger in males than in females (**Fig S3**). We found that before MZT, the  
237 CLAMP-dependent known male sex-specifically spliced genes have more exon inclusion events  
238 than their female counterparts since  $\Delta$ PSI values for males is significantly higher than in females  
239 (**Fig S3**). This was further supported by validating a randomly selected set of 12 sex-specific  
240 splicing events we identified as described in more detail below (**Fig S4-6; Table S2**).

241  
242 We then divided all CLAMP-dependent alternatively spliced events into two categories: 1) sex  
243 specifically spliced (SSS) events; and 2) non-sex specifically spliced (non-SSS) events (**Fig 2B**).  
244 We quantified CLAMP-dependent sex-specifically spliced events by comparing the change in PSI  
245 ( $\Delta$ PSI) for two classes of transcripts which we defined as follows: 1) **known** sex-specifically  
246 spliced isoforms are different from each other in control samples ( $p < 0.05$ ) (**Fig. S2A, D**); 2) **new**  
247 sex-specifically spliced isoforms are those not present in control samples (**Fig 2B**). We identified  
248 widespread CLAMP-dependent sex-specific splicing, especially in female embryos (**Fig 2B**).  
249 Interestingly, the majority of CLAMP-dependent SSS events are **new** sex-specific splicing events



250 that did not occur in the presence of maternal CLAMP (~70%) (**Fig 2C**). Furthermore, at the post-  
251 MZT stage, both CLAMP-dependent exon inclusion and exclusion were significantly enriched in  
252 male new SSS genes compared to their female-specific counterparts (**Fig S3**). Thus, in the absence  
253 of CLAMP new aberrant sex-specific spliced isoforms are generated. Therefore, we hypothesized  
254 that CLAMP normally inhibits aberrant sex-specific splicing events.

255  
256 During the first few hours of their development, *Drosophila* embryos have predominantly maternal  
257 transcripts. Therefore, we asked whether CLAMP-dependent female and male specifically-spliced  
258 genes are maternally deposited or zygotically transcribed. We compared our list of CLAMP-  
259 dependent sex-specifically spliced genes with known maternally expressed genes from previous  
260 studies<sup>45,46</sup>. We found very low levels of overlap with maternally deposited transcripts (**Fig 2D**).  
261 Therefore, most of the sex-specifically spliced genes we observed are likely to be zygotic  
262 transcripts, consistent with the function of CLAMP as a pioneer TF in the early embryo<sup>27</sup>.

263  
264 Next, we divided our CLAMP-dependent sex-specifically spliced genes into female-specific or  
265 male-specific categories. Here, it is important to note that many of these genes have multiple AS  
266 events, and thus multiple isoforms regulated by CLAMP (**Table S1**). Then, we performed Gene  
267 Ontology (GO) analysis to determine which biological processes are enriched within CLAMP-  
268 dependent sex-specifically spliced genes at pre- and post-MZT time points using time2splice. At  
269 the pre-MZT time point, female-specifically spliced genes are primarily mRNA regulatory factors  
270 such as spliceosome components and TFs (**Fig 2E**). Therefore, in females CLAMP alters the  
271 splicing of genes that can regulate the transcription and splicing of other genes to amplify its  
272 regulatory role. In contrast, the male specifically-spliced genes pre-MZT are not enriched for any  
273 specific biological function or process likely due to the small number of genes in the gene list. At  
274 the post-MZT stage in both sexes, CLAMP regulates the splicing of genes that drive development  
275 including organogenesis, morphogenesis, cell proliferation, signaling, and neurogenesis (**Fig 2E**).

276  
277 We also selected 12 random genes for validation that we identified computationally as having  
278 CLAMP-dependent splicing events of diverse types such as alternative 5' splice site (A5) or  
279 alternative first exon (AF) (**Fig S4-5**) using qRT-PCR or RT-PCR. These genes perform diverse  
280 biological functions and provide new insights into how CLAMP regulates early development (**Fig.**

281 **2E)**. We have summarized the results and functions of the validated target genes at which splicing  
282 is regulated by CLAMP (**Table S2**). Several of the target genes have functional links to CLAMP  
283 including *iab4*, *psq*, and *pep* suggesting that we have identified relevant target genes<sup>36,47,48</sup>.  
284 Furthermore, many genes that are sex-specifically spliced by CLAMP are themselves involved in  
285 splicing and chromatin regulation (**Table S2**).

286

### 287 **3. CLAMP is highly enriched along gene bodies of sex-specifically spliced genes after MZT**

288

289 Because maternal CLAMP regulates sex-specific alternative splicing, we next asked: How does  
290 CLAMP regulate female and male sex-specific splicing? If CLAMP directly regulates sex-specific  
291 splicing, we hypothesized that it would directly bind to the genes that it regulates. Therefore, we  
292 defined the binding pattern of CLAMP at the CLAMP-dependent female and male sex-specifically  
293 spliced genes in sexed embryos using CLAMP ChIP-seq data (#GSE133637).

294

295 We generated average profiles for CLAMP occupancy at genes showing CLAMP-dependent  
296 splicing in females and males at pre- and post-MZT time points in males and females (**Fig 3A,**  
297 **B**). We found that CLAMP occupies the gene bodies of many sex-specifically spliced genes that  
298 require CLAMP for their splicing. Specifically, 43.8% percent of all CLAMP-dependent sex-  
299 specifically spliced genes are bound by CLAMP: 21.9% in 0-2 Hr female embryos, 8.2% in 0-2  
300 Hr male embryos, 65.2% in 2-4 hr female embryos and 59.43% in 2-4 hr male embryos (**Table**  
301 **S3**). The increase in percentage of genes bound in 2-4 Hr embryos compared with 0-2 Hr embryos  
302 is consistent with an increased number of CLAMP binding sites at the later time point<sup>48</sup>. Overall,  
303 these data are consistent with a direct role for CLAMP in regulating splicing of sex-specifically  
304 spliced genes.

305

306 Next, we compared the average CLAMP binding pattern at sex-specifically spliced genes to the  
307 CLAMP binding pattern at genes whose expression but not splicing is both sex-biased and  
308 dependent on CLAMP. We defined CLAMP-dependent sex-biased genes as differentially  
309 expressed genes in males in females that are dependent on CLAMP. At sex-specifically spliced  
310 genes, CLAMP occupancy is present over gene bodies which is a dramatically different binding  
311 profile from genes that are expressed but not spliced in a CLAMP-dependent and sex-biased

312 manner where CLAMP is enriched at the TSS and TES instead of at gene bodies (**Fig 3C and D**,  
313 rectangular box in **Fig 3A-D**). Furthermore, CLAMP binding is also modestly enriched at the TSS  
314 of female-biased expressed genes in females, consistent with enhanced CLAMP occupancy at the  
315 TSS of expressed genes<sup>33</sup>. As a control, we used a random set of active genes that are not regulated  
316 by CLAMP (green lines in **Fig 3A-D**) and we observed lower occupancy than at CLAMP-  
317 dependent genes. Overall, we found preferential binding of CLAMP along the gene bodies of  
318 genes that have CLAMP-dependent splicing in both females and males in contrast to TSS and TES  
319 binding at genes where expression requires CLAMP.

320  
321 To determine whether the binding of CLAMP to gene bodies occurs close to splice junctions, we  
322 measured the distance of CLAMP peaks from the nearest splice junction (**Fig S7**). We found that  
323 CLAMP peaks are most frequently within 200-400bp of either the start or the end of a splice  
324 junction, especially in sex-specifically spliced genes. The resolution of these measurements is also  
325 limited by sonication and therefore it is possible that binding occurs even closer to splice junctions.  
326 We also found that CLAMP binds to chromatin closer to splice junctions at sex-specifically spliced  
327 genes compared to sex-biased genes in 2-4 hr female embryo samples that have the most target  
328 genes and CLAMP binding events. The results were similar for all CLAMP peaks (**Fig S7C**)  
329 compared to peaks only present in introns (**Fig S7G**). We did not observe a difference in proximity  
330 of CLAMP peaks to the nearest splice junction between sex-specifically spliced genes and sex-  
331 biased genes in other samples but this negative result is not conclusive due to the decreased number  
332 of peaks and target genes in the other samples. Together these data support a direct role for  
333 CLAMP in co-transcriptional RNA processing that we hypothesize is due to direct contact with  
334 target RNA transcripts and altering the recruitment of spliceosome components.

335  
336 **4. CLAMP binds to RNA on chromatin of many sex-specifically spliced genes and is a**  
337 **component of the mature spliceosome complex specifically in males**

338  
339 To test our hypothesis that CLAMP directly regulates co-transcriptional RNA splicing by  
340 contacting both the DNA and RNA of sex-specifically spliced genes and altering spliceosome  
341 recruitment, we first asked whether CLAMP directly binds to RNA. Although CLAMP do not  
342 have a canonical RNA recognition motifs (**RRM**), it has a prion-like intrinsically disordered

343 domain, present typically in many RNA binding proteins<sup>49,50</sup>. Using individual nucleotide  
344 resolution UV crosslinked immunoprecipitation (iCLIP) which defines direct protein-RNA  
345 interactions<sup>51</sup>, we determined that most CLAMP RNA binds directly to hundreds of RNAs and  
346 most targets are sex-specific with only 15% of the targets RNAs shared between males and females  
347 (**Fig S8A, Table S5**). iCLIP was conducted on fractionated embryonic male and female cultured  
348 cells because it was not possible to generate enough starting material from sexed embryos.  
349 Interestingly, most CLAMP interaction with RNA occurs on chromatin (91.9% of male RNA  
350 targets; 58.4% of female RNA targets) (**Fig S8A**). Even though iCLIP was conducted in embryos  
351 cell lines and not embryos, we still found 47 target genes where CLAMP regulates sex-specific  
352 splicing and interacts with both the DNA and RNA including but not only the key regulator of sex-  
353 specific splicing *sxl*. Therefore, CLAMP sex-specifically and directly interacts with RNA targets  
354 on chromatin including the RNA encoded by genes at which it regulates sex-specific splicing.

355  
356 In addition to target RNAs, CLAMP also directly interacts with spliceosomal RNAs. Specifically,  
357 we found that CLAMP binds to U1-U6 snRNAs (**Table S5**) more strongly in males (N=23)  
358 compared to females (N=9) (**Fig S8B, C**). In the male chromatin fraction CLAMP interacts with  
359 the catalytic step 2 spliceosome consisting of U2, U5, U6 snRNAs (FDR:1.7E-3). In contrast, the  
360 female chromatin fraction is enriched for transcripts that encode proteins that bind to the U1-U2  
361 snRNAs (FDR:1.1E-2) suggesting a different type of regulation of splicing in males and females.  
362 Although these data establish that CLAMP interacts directly with some of its RNA targets to  
363 regulate co-transcriptional splicing and interacts with the spliceosomes, it still does not explain  
364 how CLAMP regulates splicing in a sex-specific manner.

365  
366  
367 **4. CLAMP interacts with components of the spliceosome complex and influences their**  
368 **occupancy on chromatin**

369  
370 CLAMP occupies the gene bodies of many CLAMP-dependent sex-specifically spliced genes  
371 (**Fig 3**), physically associates with protein and RNA spliceosome components<sup>36</sup>, and directly  
372 interacts with the RNA of a subset of target genes. Therefore, we hypothesized that CLAMP  
373 regulates recruitment of components of the splicing machinery to chromatin differentially in males

374 and females. To test this hypothesis, we first examined how CLAMP regulates the occupancy of  
375 the MLE RNA helicase, a component of both the MSL complex and the spliceosome<sup>30,32,52-54</sup> for  
376 two reasons: 1) MLE is a component of both the MSL complex which is present only in males  
377 (ref) and the spliceosome in both sexes<sup>54</sup> and 2) CLAMP physically associates with MLE<sup>28,55,56</sup>.  
378 Therefore, we hypothesized that CLAMP regulates the distribution of MLE between the  
379 spliceosome and MSL complex to modulate sex-specific alternative splicing in males.

380  
381 To determine whether CLAMP modulates MLE distribution on chromatin, we measured MLE  
382 distribution at the genomic level using CUT&RUN<sup>57,58</sup>. We performed CUT&RUN in the presence  
383 (*MTD-GAL4>UAS-GFPRNAi*) and absence (*MTD-GAL4>UAS-CLAMP [val22] RNAi*) of  
384 maternal CLAMP at the pre-MZT and post-MZT embryonic stages in males. Next, we identified  
385 MLE peaks in the presence or absence of maternally deposited CLAMP. MLE binds to chromatin  
386 both in males and females, with stronger binding in males (**Fig 4A**). The absence of CLAMP  
387 results in loss of MLE male peaks in males compared to no change in female MLE peaks (**Fig 4A**).  
388 This supports our hypothesis that CLAMP regulates MLE recruitment to chromatin in males.

389  
390 We next compared the distribution and location of MLE peaks with that of CLAMP peaks  
391 previously identified in control embryos at the same time points<sup>21</sup> and classified MLE peaks into  
392 two groups: 1) MLE peaks overlapping with CLAMP peaks (**Fig 4B,C and Fig S9**) and 2) unique  
393 MLE peaks which do not overlap with CLAMP peaks (**Fig 4B,C and Fig S9**) at both 0-2 Hr pre-  
394 MZT and 2-4 Hr post-MZT stages. Also, independent of developmental stage, MLE peaks which  
395 overlap with CLAMP peaks are largely at promoters with fewer peaks localizing to introns. In  
396 contrast, unique MLE peaks that do not overlap with CLAMP peaks are primarily localized to  
397 introns (**Fig S9**). This distribution is similar for X-chromosomal and autosomal peaks.

398  
399 In the absence of CLAMP, there is a considerable loss and redistribution of both overlapping  
400 and non-overlapping MLE peaks. We found that overall ~60% of MLE peaks were lost at the 2-4  
401 Hr post-MZT stage in the absence of CLAMP. Moreover, 26% (pre-MZT) and ~35% (post-MZT)  
402 of the MLE peaks observed in the absence of CLAMP were new and not present in control embryos  
403 (**Fig 4B-C**). After the loss of maternal CLAMP, ~23% of MLE peaks overlapping with CLAMP  
404 are also lost at the pre-MZT stage, which increases to ~51% at the post-MZT stage (**Fig 4B-C**).

405 Overall, our data suggest that MLE is redistributed in the absence of CLAMP suggesting that  
406 CLAMP normally prevents aberrant recruitment of MLE in addition to the formation of aberrant  
407 splice isoforms (**Fig 2**). Furthermore, we hypothesize that MLE at the new peaks is part of the  
408 spliceosome complex and not MSL complex because MSL complex is not present on chromatin  
409 in the absence of CLAMP<sup>33</sup>.

410  
411 To provide insight into the differences between MLE peaks which overlap with CLAMP and those  
412 which do not, we identified sequence motifs which are enriched within each class of peaks using  
413 MEME within the time2splice pipeline. The known CLAMP motif<sup>33</sup>, a stretch of (GA)<sub>n</sub> repeats,  
414 is enriched at regions that are bound by both MLE and CLAMP independent of stage and  
415 chromosome type as expected. In contrast, MLE peaks which do not overlap with CLAMP have  
416 motifs with stretches of GTs, GCTs, and GTAs but not (GA)<sub>n</sub> repeats (**Fig S9**). In the absence of  
417 CLAMP, the remaining MLE peaks (red circle) were most enriched for (GT)<sub>n</sub> motifs (**Fig S9C**,  
418 **D**) which have known roles in splicing through forming secondary RNA structures<sup>59-61</sup>. Therefore,  
419 CLAMP prevents MLE from redistributing to sequence motifs that are known regulators of  
420 splicing.

421  
422 We also found that CLAMP alters the distribution of MLE from introns to promoters. MLE peaks  
423 that overlap with CLAMP (intersection between green circle with red and grey circles, **Fig S9**) on  
424 the X-chromosome (**Fig S9A, C**) or autosomes (**Fig S9B, D**) are enriched at promoters (**Fig S9A**,  
425 **C**(X-chromosome), **Fig S9B, D** (Autosomes). In contrast, **new** unique MLE peaks not overlapping  
426 with CLAMP (grey area in Venn diagrams, **Fig S9**) and those that are gained after CLAMP RNAi  
427 (red area in Venn diagrams, **Fig S9**) are enriched at introns (**Fig S9A, C** (X-chromosome), **Fig**  
428 **S9B, D** (Autosomes). These results support a role for CLAMP in sequestering MLE at (GA)<sub>n</sub> rich  
429 sequences within promoters that prevents it from binding to GT motifs within introns that are  
430 known regulators of splicing<sup>59-61</sup>. Thus, in the absence of CLAMP, MLE is redistributed and  
431 aberrantly binds to intronic sequences with known motifs that regulate splicing irrespective of  
432 whether present on X-chromosome or autosomes.

433  
434 To determine how MLE redistribution could alter sex-specific splicing, we plotted the distribution  
435 of MLE binding on CLAMP-dependent female and male-specifically spliced genes in the presence

436 and absence of CLAMP (**Fig S10A, B**). Pre-MZT, MLE binds near the TSS of male-specifically  
437 spliced genes independent of maternal CLAMP (**Fig S9A**). At the post-MZT stage, loss of  
438 maternal CLAMP in male embryos causes MLE to change its binding distribution along the gene  
439 body (rectangle with dotted lines: **Fig S10B**) of CLAMP-dependent male-specifically spliced  
440 genes (blue line) relative to CLAMP-dependent female-specifically spliced genes (red line). These  
441 profiles are consistent with a model in which CLAMP is essential for MLE distribution at male-  
442 specifically spliced genes which regulates male sex-specific splicing. In males, increased MLE  
443 binding at female sex-specifically spliced genes (red line, enclosed within rectangle with dotted  
444 lines: **Fig S10B**) in absence of CLAMP may result in differential splicing of these genes. Thus, we  
445 hypothesize that CLAMP inhibits mis-localization of MLE to female sex-specifically spliced  
446 genes in males.

447  
448 Next, we asked whether CLAMP associates with spliceosome complex protein components other  
449 than MLE, which is also a component of the MSL complex. We have shown that CLAMP directly  
450 binds to snRNAs (Fig. S) and previously reported that CLAMP physically associates with several  
451 spliceosome complex components based on mass spectrometry analysis<sup>36</sup>. To validate these  
452 associations, we performed co-immunoprecipitation (coIP) experiments to assess association  
453 between CLAMP and two spliceosome components with known functions in sex-specific splicing,  
454 the conserved hrb27C and Squid proteins<sup>54,62,63</sup>. We found that in both S2 (male) and Kc (female)  
455 cells, CLAMP interacts with hrb27C (**Fig S11A, B**). In contrast, CLAMP only associates with  
456 Squid in female Kc cells and not in male S2 cells (**Fig S11A, B**), consistent with mass spectrometry  
457 data. In contrast to MLE and CLAMP which are enriched on the male X-chromosome, Squid  
458 occupancy on polytene chromosomes is decreased on the male X chromosome compared with the  
459 female X chromosome (**Fig S11C-E**). Therefore, it is possible that there is a competition between  
460 CLAMP recruitment of MSL complex to the male X chromosome and CLAMP recruitment of the  
461 spliceosome complex containing Squid that contributes to sex-specific splicing.

462  
463 Overall, CLAMP differentially associates with spliceosome components in males and females,  
464 providing a potential mechanism by which CLAMP can regulate sex-specific splicing.  
465 Specifically, it is possible that CLAMP influences the distribution of spliceosome components like  
466 MLE between different protein complexes such as MSL complex and the spliceosome itself. We

467 hypothesize that differential binding of CLAMP to components of spliceosome like Squid in  
468 females and MLE in males confers sex-specific recruitment of the spliceosome, thus generating  
469 transcriptome diversity between female and male animals.



470 **5. CLAMP regulates the chromatin accessibility and splicing of the *sxl* gene and directly**  
471 **interacts with the *sxl* RNA and alters splicing of other sex determination pathway component**  
472 **genes**  
473

474 In *Drosophila*, sex-specific alternative splicing is regulated by the sex-determination pathway.  
475 Sex-lethal (Sxl) is the master regulator of sex determination<sup>15</sup> and drives subsequent sex-specific  
476 splicing in females<sup>64</sup>. Therefore, we asked whether CLAMP regulates *sxl* gene splicing and Sxl  
477 protein levels in addition to directly regulating sex-specific splicing by binding to the DNA and  
478 RNA of target genes as we have demonstrated (**Fig 3, S8 and Table S3, S5**).

479  
480 Functional Sxl protein is produced specifically in females because exon three in the *sxl* transcript  
481 contains a premature stop codon which is spliced out in females but retained in males<sup>14</sup>. Therefore,  
482 the Sxl protein is non-functional in males and becomes degraded<sup>15,65</sup>. In females, Sxl protein  
483 inhibits the splicing of the *msl-2* transcript which prevents aberrant MSL-2 expression and MSL  
484 complex formation in females (**Fig 5A**). Furthermore, Sxl promotes female specific-splicing of the  
485 downstream effector called transformer (*tra*). The female-specific Transformer protein regulates  
486 splicing of another downstream transcript doublesex (*dsx*), which is sex-specifically spliced. In  
487 contrast, the male-specific *transformer* transcript is not translated into functional Transformer  
488 protein in males. Therefore, in the absence of any functional male-specific Transformer protein,  
489 the *doublesex* transcript undergoes male-specific splicing (**Fig 5A**). The sex-specific isoforms of  
490 the Doublesex protein drive sex-specific splicing of many downstream genes, shaping sexual  
491 variation between males and females<sup>66,67</sup>.

492  
493 Because CLAMP regulates sex-specific splicing and is maternally deposited, we hypothesized that  
494 CLAMP regulates the canonical sex determination pathway described above. To test this  
495 hypothesis, we used our previously described recessive *clamp* null mutant *clamp*<sup>2</sup> line<sup>44</sup>, the  
496 heterozygous mutant *clamp*<sup>2</sup>/*CyO-GFP* line, and our previously reported rescue line which is  
497 homozygous for the *clamp*<sup>2</sup> allele and contains an insertion of the wild type *CLAMP* gene. Sxl is  
498 strongly regulated via alternative splicing of its mRNA<sup>68-70</sup>. Therefore, we designed an RT-PCR  
499 assay to distinguish between the female-specific (excluding exon 3) and male-specific (including  
500 exon 3) versions of the *sxl* transcript (**Fig 5B**). We used this assay to measure CLAMP-dependent  
501 changes in alternative splicing and found that in homozygous *clamp*<sup>2</sup> female animals, there is a

502 small but detectable amount of the longer male-specific *sxl* transcript (**Fig 5B**, lane c). This mis-  
503 regulation of *sxl* splicing is rescued by our *CLAMP* containing rescue construct (**Fig 5B**, lane d).  
504 Our iCLIP data shows that *CLAMP* directly binds to *sxl* transcripts in females and not males  
505 (**Table S5**) emphasizing *CLAMP*'s direct role in *sxl* splicing in females.

506  
507 To test whether defects in splicing altered Sxl protein levels, we performed western blots to  
508 quantify Sxl protein in wild type females and males and *clamp*<sup>2</sup>null females (**Fig 5C**). We  
509 observed a reduction in Sxl protein levels in females in the *clamp*<sup>2</sup> null background when compared  
510 with controls. Also, homozygous *clamp*<sup>2</sup> mutant males die before the third instar larval stage, and  
511 therefore it was not possible to measure the splicing of transcripts in male *clamp*<sup>2</sup> mutant larvae.  
512 Overall, we determined that *CLAMP* promotes female-specific splicing of the *sxl* transcript to  
513 ensure that normal Sxl protein levels are produced.

514  
515 To determine a possible mechanism by which *CLAMP* regulates splicing of *sxl*, we mined our  
516 previously generated Micrococcal Nuclease sequencing data<sup>26</sup>, which measures chromatin  
517 accessibility in S2(male) and Kc(female) cells in the presence and absence of *CLAMP*. Regions  
518 of the genome that are accessible have a positive MACC score and are shown in blue and regions  
519 of the genome that are inaccessible have a negative score and are shown in red (range is between  
520 -0.33(red) and +1.33 (blue). We found that after the loss of *CLAMP* in female Kc cells, chromatin  
521 accessibility at exon 3 of *sxl* increases significantly (**Fig 5D**). As shown in the Fig 5D boxed  
522 rectangular inset, *sxl* exon3 shows a strong and statistically significant peak<sup>26</sup> indicative of open  
523 chromatin specifically in females in which *CLAMP* has been depleted compared to control  
524 females. Therefore, *CLAMP* normally promotes a closed chromatin environment at exon 3 in  
525 females but not males.

526  
527 Our results suggest that increased chromatin accessibility in males compared to females results in  
528 retention of exon3 in the male *sxl* transcript. Consistent with our results, recent reports provide  
529 strong evidence that increased chromatin accessibility contributes substantially to the retention of  
530 introns during AS<sup>71</sup>. In addition, splicing-associated chromatin signatures have recently been  
531 identified<sup>72</sup>. Consistent with our results in males, open chromatin marks such as H3K4me1&  
532 H3K4me2 are enriched just upstream of the start site of retained exons<sup>72</sup>. In contrast, histone marks

533 associated with condensed chromatin such as H4K20me1&2, H3K9me3, and H3K27me3 are  
534 highly enriched at excluded exons<sup>72</sup>, consistent with our results in females.

535  
536 Next, we examined the splicing of other components of the sex determination pathway for defects  
537 in alternative splicing in the absence of CLAMP for which we were able to design effective RT-  
538 PCR primers (**Fig 5E-F**). In embryos which lack CLAMP (**Fig 5E**, lane 2), the *dsx* female-specific  
539 transcript is aberrantly produced in males (**Fig 5E**, lanes 4 and 5). In contrast, the male-specific  
540 *dsx* transcript is not expressed in male embryos which lack CLAMP, similar to wild type female  
541 embryos (**Fig 5E**, lane 7-10). We also observed male-specific *dsx* transcripts in female *clamp*<sup>2</sup>  
542 mutant larvae (**Fig 5E**, lane c). Therefore, *dsx* splicing is regulated by CLAMP and CLAMP binds  
543 to the *dsx* gene (**Fig S11**). However, *dsx* splicing is also regulated by Sxl whose protein levels are  
544 regulated by CLAMP (**Fig 5C**).

545  
546  
547 Furthermore, we found that CLAMP regulates splicing of the male-specific lethal-2 (*msl-2*)  
548 transcript, which is present only in males because Sxl regulates its splicing and stability. In the  
549 *clamp*<sup>2</sup> mutants: 1) levels of the nonfunctional female *msl-2* isoform (**Fig 5F**, lane 5) increased in  
550 male embryos (**Fig 5F**, lane 2); 2) levels of the functional male-specific *msl-2* isoform increased  
551 in females (**Fig 5F**, lane c). To determine whether these splicing defects also cause dysregulation  
552 of MSL-2 protein expression and localization, we performed polytene immunostaining from  
553 female *clamp*<sup>2</sup> mutant salivary glands. In the absence of CLAMP, ectopic MSL2 protein (in red) is  
554 present at several locations on female chromatin compared with controls (*clamp*<sup>2</sup>/*CyOGFP*  
555 heterozygous females) where MSL-2 protein is not present on chromatin (**Fig 5G**). Similar to *dsx*,  
556 the gene is also bound by CLAMP (**Fig S12**) and regulated by Sxl and therefore could be regulated  
557 through both direct and indirect mechanisms. Since CLAMP does not bind to the *dsx* or *msl-2*  
558 transcripts directly it is possible that it indirectly regulates *dsx* and *msl-2* splicing through Sxl.  
559 CLAMP does bind to the RNA that encodes another sex-specific splicing regulator and Sxl target  
560 gene *fru* (Fruitless) in both females and males (**Table S5**). Together, these data reveal that CLAMP  
561 regulates the splicing and protein expression of multiple components of the sex determination  
562 pathway.

563

564 To further define how CLAMP and Sxl function together to regulate sex-specific splicing, we  
565 asked whether CLAMP nuclear RNA targets in males and females have known Sxl binding motifs  
566 (**Fig S13A**). Therefore, we compared CLAMP RNA targets from female embryonic cell lines with  
567 available data identifying Sxl RNA targets in adult female heads (**#GSE98187**). Even though the  
568 data sets are from different cell types, we still identified 61 overlapping targets in females (**Fig**  
569 **S13B, Table S6**) which include the *sxl* transcripts and snRNAU5, a component of the U5snRNP  
570 complex involved in splicing. Interestingly, 153 CLAMP RNA targets from males overlapped with  
571 Sxl female RNA targets, indicating that CLAMP may function in males at genes that are Sxl targets  
572 in females (**Fig S13B, C Table S6**). Overall, we found ~20% of CLAMP RNA targets have Sxl  
573 motifs and similarly ~25% of CLAMP targets are Sxl targets as well. Also, 55 (19.6%) of the  
574 CLAMP-dependent female sex-specific spliced genes are Sxl targets (**Table S7**). These results  
575 further support our hypothesis that CLAMP functions together with Sxl to regulate sex-specific  
576 splicing both via directly interacting with the DNA and RNA of sex-specifically spliced genes and  
577 indirectly through regulating Sxl.

578

579

## 580 **Discussion:**

581

582 Alternative splicing (AS) is a highly conserved mechanism that generates transcript and protein  
583 diversity<sup>3,73,74</sup>. Several studies have reported highly dynamic RNA bound proteomes (RBPs)  
584 during the Maternal Zygotic Transition (MZT) across diverse phyla, with widespread alternative  
585 splicing events occurring during early embryonic development<sup>1,2,39,41,46</sup>. Furthermore, different  
586 isoforms are present in maternal and zygotic transcripts<sup>45,46</sup>. However, the mechanisms that  
587 regulate transcript diversity during the early hours of an organism's life remain elusive.

588

589 Maternally-deposited pioneer transcription factors drive zygotic genome activation, but their role  
590 in generating transcription diversity in the early embryo was unknown. Here, we define sex-  
591 specific alternative spliced isoforms in pre- and post- MZT *Drosophila melanogaster* female and  
592 male embryos genome-wide for the first time. Furthermore, we identify a maternally-deposited  
593 pioneer TF, CLAMP, which regulates sex-specific transcript diversity in early embryos. Prior work  
594 on sex-specific transcript diversity<sup>24,37-39,41,62,75-78</sup> either examined sex-biased differences in gene

595 expression or sex-specific transcript diversity much later in development in adult gonads or brain.  
596 To overcome the challenge of sexing early embryos before zygotic genome activation, we used a  
597 meiotic drive system that generates sperm with either X or only Y chromosomes<sup>9</sup> and measured  
598 sex specific transcript diversity caused by alternative splicing.

599  
600 Splice variants occur at different frequencies over time and between sexes. To date, we lack  
601 pipelines to characterize these how isoforms change over time. Therefore, we developed  
602 time2splice, which identifies mechanisms to regulate temporal and sex-specific alternative  
603 splicing by combining RNA-seq and protein-DNA interaction data from CUT&RUN and ChIP-  
604 seq experiments. Time2splice has three parts: 1) temporal splicing analysis based on the SUPPA  
605 algorithm; 2) temporal protein-DNA analysis, and 3) temporal multi-omics integration. The  
606 pipeline and analysis steps can be accessed at <https://github.com/ashleymaeconard/time2splice>.

607  
608 Even following the initial few hours of its existence, there is a clear difference between a male and  
609 female *Drosophila* embryo's transcript variation that was not previously identified (**Fig1, 2**).  
610 Because the RNA transcript variants in both males and females encode genes involved in  
611 developmental processes, sex-specific developmental distinctions may occur earlier than  
612 previously thought. We demonstrate that a fundamental developmental trajectory differs between  
613 males and females from the initial hours of their existence long before gonad formation. Such early  
614 sex-specific transcript diversity provides insight into how developmental disorders that originate  
615 before gonad formation can exhibit variable penetrance between sexes.

616  
617 We defined groups of genes in both males and females that undergo alternative splicing events  
618 which are regulated by maternally deposited CLAMP. Thus, the maternal environment regulates  
619 both transcription initiation and shapes RNA processing. The key question is: How does CLAMP,  
620 a ubiquitously expressed pioneer TF, regulate sex-specific splicing? We identified several  
621 mechanisms by which CLAMP regulates sex-specific splicing.

622  
623 CLAMP binds directly to intronic regions of approximately half of the sex-specifically spliced  
624 genes that it regulates in both males and females. CLAMP also directly binds to different RNA  
625 transcripts on chromatin in males and females and associates with U1-U6 snRNAs providing a

626 mechanism by which it regulates, co-transcriptional splicing. Therefore, our data supports a model  
627 in which direct CLAMP binding to DNA and RNA regulates splicing of its target genes.

628  
629 Furthermore, CLAMP regulates chromatin as a pioneer TF<sup>26,48</sup> and recent literature links  
630 chromatin and splicing<sup>71,72</sup>. For example, closed chromatin marks have recently been linked to  
631 exon exclusion and open chromatin has been linked to exon inclusion<sup>71,72</sup>. Proteomic analysis<sup>36</sup>  
632 and coIPs (**Fig S11 A,B**) show that CLAMP is associated with spliceosome complex components,  
633 including Squid and Hrb27C, further supporting a direct role for CLAMP in splicing. Interestingly,  
634 CLAMP associates with Squid specifically in females. In contrast to Squid, MLE, a component of  
635 both the spliceosomes and MSL complex<sup>32</sup> physically interacts with CLAMP only in males.  
636 Because Squid is already known to regulate sex-specific splicing<sup>62</sup>, these data support a model in  
637 which differential association between CLAMP and spliceosome complex components in males  
638 and females regulates sex-specific splicing. Our results also indicate that CLAMP is present in  
639 functional spliceosome complex in males but not in females (**Table S5**). Thus, we hypothesize that  
640 CLAMP may recruit spliceosome complex components to regulate splicing by altering the  
641 chromatin environment or/and directly binding to target RNA transcripts (**Fig 6A**).

642  
643 Based on our results, we hypothesize that there are two separate mechanisms by which CLAMP  
644 can regulate splicing in males and females (**Fig 6**). We show that CLAMP inhibits aberrant splicing  
645 events in males, especially at the post-MZT stage (**Fig 2**). In males, we found that MLE distribution  
646 on chromatin is CLAMP dependent (**Fig 4A**) Also, MLE colocalizes with CLAMP at promoter  
647 regions but in contrast, MLE alone is more often bound to intronic sequences, a prerequisite for  
648 its splicing function, (**Fig 6B**). However, in the absence of CLAMP, the promoter bound MLE is  
649 reduced, and MLE re-localizes from its normal intronic binding sites to new intronic regions that  
650 contain GT sequence motifs (**Fig S9**) that are known to regulate splicing<sup>59-61</sup>. Therefore, we  
651 hypothesize that CLAMP regulates the localization of MLE to prevent the aberrant formation of  
652 female-specific transcripts in males that we observed in the absence of CLAMP.

653 In males, another function of CLAMP is to recruit the MSL ribonucleoprotein complex to the X  
654 chromosome to regulate dosage compensation. CLAMP physically interacts directly with MSL-  
655 2<sup>28</sup> and associates with MLE, an RNA helicase that acts on the *roX* non-coding RNA components  
656 of MSL complex<sup>31,44,52,55,79</sup>. Furthermore, RNA transcript splicing is regulated by the spliceosome,

657 another ribonucleoprotein complex, consisting of many protein and RNA components<sup>54</sup>. Because  
658 MLE is part of the MSL complex only in males and the spliceosome complex in both sexes, we  
659 hypothesize that CLAMP influences the relative distribution of MLE between the MSL complex  
660 and the spliceosome to co-regulate sex-specific splicing and male dosage compensation (**Fig 6B**).  
661 Without CLAMP, the MSL complex does not localize to the X-chromosome and becomes  
662 destabilized<sup>33</sup>; thus, MLE is no longer part of the MSL complex and is available to redistribute to  
663 new spliceosome binding sites. Therefore, we provide evidence to support a model in which  
664 CLAMP sex-specifically inhibits aberrant binding of MLE to motifs that regulate splicing which  
665 alters sex-specific transcript diversity.

666  
667 To provide mechanistic insight into how a pioneer factor like CLAMP regulates sex-specific  
668 splicing, we also examined the splicing of sex determination pathway components. In females but  
669 not in males, CLAMP binds near the early promoter of the *sxl* gene (SxlPe) and regulates the  
670 chromatin environment at exon 3 of *sxl* which is normally spliced out in females (**Fig 6C**). Also,  
671 only in females and not in males CLAMP directly binds to *sxl* transcript. Consistent with recent  
672 literature<sup>71,72</sup>, we hypothesize that closed chromatin at exon 3 induces exclusion of this exon from  
673 female *sxl* transcripts whereas more open chromatin in males result in its inclusion in the male *sxl*  
674 transcript. In the absence of CLAMP in females, the chromatin becomes more open, and *sxl*  
675 transcript is not bound by CLAMP. Therefore, exon 3 is included in *sxl* transcripts which prevents  
676 translation due to the incorporation of a stop codon. In the absence of CLAMP, exon 3 is retained  
677 in females similar to wild type males, resulting in the formation of untranslatable *sxl* transcript in  
678 females, significantly reducing levels of Sxl protein, thus dysregulating downstream splicing  
679 events (**Fig 6C**). Because CLAMP binding sites are present near the promoter region of the *sxl*  
680 gene, we hypothesize that CLAMP regulates chromatin at exon 3 from a distance consistent with  
681 literature. CLAMP can mediate long-range chromatin interactions<sup>80,81</sup> and act on chromatin  
682 accessibility at a distance<sup>26</sup>.

683  
684 In *Drosophila*, the master regulator Sxl initiates the sex-specific splicing cascade very early in  
685 development to drive sex determination<sup>14,20,69</sup>. Decreased Sxl protein levels in female *clamp*<sup>2</sup>  
686 mutants and mis-expression of female and male-specific *dsx* transcripts suggest that CLAMP may  
687 regulate sexual differentiation because sex-specific Dsx protein isoforms are known determinants

688 of sexual dimorphism<sup>15</sup>. Also, CLAMP directly binds to the DNA of *sxl*, *dsx*, and *msl-2* target  
689 genes. Furthermore, CLAMP binds to the DNA and RNA of *sxl* and *fru*. Fruitless (*fru*) encodes a  
690 BTB zinc finger transcription factor that contributes to sexual differentiation of the neural circuits  
691 <sup>82,83</sup> and many of the CLAMP dependent sex-specifically spliced genes belong to neural  
692 development pathway (**Fig 2E**). Since CLAMP and Sxl have both overlapping and distinct targets,  
693 we hypothesize that CLAMP regulates sex-specific splicing both via the Sxl-mediated sex-  
694 determination pathway as well as independent of it.

695  
696

697 Therefore, CLAMP may regulate splicing through at least two possible mechanisms that are not  
698 mutually exclusive: 1) CLAMP directly regulates the splicing of many sex-specifically spliced  
699 genes by linking the RNA to the DNA and altering the recruitment of the spliceosome; 2) CLAMP  
700 regulates the sex-specific of genes such as *msl-2* and *dsx* indirectly by regulating Sxl which is a  
701 known regulator of their splicing and thus downstream splicing events.

702  
703

704 Overall, we hypothesize that both different composition of the spliceosome and differential  
705 recruitment to chromatin drive sex-specific changes in splicing. We identify CLAMP as a maternal  
706 factor that regulates sex-specific alternative splicing through its sex-biased association with the  
707 DNA and RNA of target genes and recruitment of spliceosome components and its ability to  
708 influence the sex determination pathway. Identifying the factors that regulate this sex-biased  
709 association of CLAMP with spliceosome complex components will be a key future direction.

710

711 Here, we show for the first time that a maternal factor controls sex-specific splicing during early  
712 embryonic development, highlighting how the maternal environment influences transcript  
713 diversity in the zygote from activation of the zygotic genome to the processing of zygotic RNA  
714 products. Consistent with recent literature linking chromatin accessibility and splicing, our results  
715 suggest that CLAMP could be one example of a more general splicing regulatory mechanism  
716 controlled by the interaction between pioneer TFs that alter chromatin accessibility and  
717 components of the RNA processing machinery to generate spatial-temporal transcript diversity.  
718 While we analyzed sex-specific transcriptome diversity in this study and linked it to the sex-



719 specific dosage compensation process, similar mechanisms could drive cell-type specific variation.  
720 For example, cell fate-determining transcription factors could regulate the chromatin occupancy  
721 of splicing complex components to promote the formation of cell-type-specific isoforms. We also  
722 present time2splice, a new pipeline to uncover mechanisms which drive such spatial-temporal  
723 transcript diversity by integrating splicing and chromatin occupancy data.

724

## 725 **Materials and Methods:**

726

### 727 **Fly strains and rearing**

728 *Drosophila melanogaster* fly stocks were maintained at 24°C on standard corn flour sucrose  
729 media. Fly strains used: *MTD-GAL4* (Bloomington, #31777), *UAS-CLAMP<sup>RNAi</sup>[val22]*  
730 (Bloomington, #57008), Meiotic drive fly stocks +; *SD72/CyO* and *19-3, yw, Rsp[s]-*  
731 *B[s]/Dp(2:y)CB25-4, y+, Rsp[s]B[s]*; *SPSD/CyO* (Bloomington, #64332) (both gifts from  
732 Cynthia Staber). These were crossed to obtained male and female embryo of desired genotypes  
733 according to Rieder et al 2017.

734

### 735 **Sample collection and Western blotting**

736 Salivary glands from third instar larvae were dissected in cold PBS and samples frozen in liquid  
737 nitrogen. Total protein from the samples was extracted by homogenizing tissue in the lysis buffer  
738 (50mM Tris-HCl pH 8.0, 150mM NaCl, 1% SDS, 0.5X protease inhibitor) using a small pestle.  
739 After a five-minute incubation at room temperature, cleared the samples by centrifuging at room  
740 temperature for 10 minutes at 14,000xg. To blot for CLAMP and Actin, 5 micrograms of total  
741 protein was run on a Novex 10% Tris-Glycine precast gel (Life technologies). To measure Sex-  
742 lethal protein levels, 20 micrograms of total protein was run on a Novex 12% Tris-Glycine precast  
743 gel (Life technologies). Protein was transferred to PVDF membranes using the iBlot transfer  
744 system (ThermoFisher Scientific) and probed the membranes for CLAMP (1:1000, SDIX), Actin  
745 (1:400,000, Millipore), and SXL (1:500, a gift from Fatima Gebauer) antibodies using the Western  
746 Breeze kit following the manufacturer's protocol (ThermoFisher Scientific). We quantified the  
747 relative expression of protein for SXL using the gel analysis tool in ImageJ software following the  
748 website's guidelines<sup>84</sup>. For each genotype, we first internally normalized the amount of SXL

749 protein to Actin. Next, we determined the protein's relative expression by comparing the Actin  
750 normalized quantities to y[1], w[1118] female samples.

751

### 752 **Polytene chromosome squashes and immunostaining**

753 Polytene chromosome squashes were prepared as previously described in Reider et al. 2017. We  
754 stained polytene chromosomes with rabbit anti-CLAMP (1:1000, SDIX), mouse anti-Squid (1:50,  
755 1B11, DSHB), rabbit anti-MLE (1:1000, gift from Mitzi Kuroda), rat anti-MSL2 (1:500, gift from  
756 Peter Becker) antibodies. For detection, we used all Alexa Fluor secondary antibodies against  
757 rabbit and mouse at a concentration of 1:1000 and visualized slides at 40X on a Zeiss Axioimager  
758 M1 Epifluorescence upright microscope with the AxioVision version 4.8.2 software.

759

### 760 **Splicing assays for male and female-specific transcripts**

761 To test for the male and female splice forms of *sex-lethal*, *transformer*, *doublesex*, and *msl2*, total  
762 RNA was extracted from ten third instar larvae from each genotype. We reverse-transcribed two  
763 micrograms of total RNA using the SuperScript VILO cDNA Synthesis Kit (Life Technologies)  
764 following the manufacturer's protocol. We amplified target sequences by PCR using primers  
765 designed to span Alternatively spliced junctions. Alternative splicing primer sequences for *sxl* FP-  
766 TGCAACTCACCTCATCATCC, *sxl* RP- GATGGCAGAGAATGGGACAT, for *tra* FP-  
767 TGAAAATGGATGCCGACAG, *tra* RP- CTCTTTGGCGCAATCTTCTC, for *dsx* female  
768 transcript *dsxF* FP- CTATCCTTGGGAGCTGATGC, *dsxF* RP-  
769 TCGGGGCAAAGTAGTATTCG, for *dsx* male transcript *dsxM* FP-  
770 CAGACGCCAACATTGAAGAG, *dsxM* RP- CTGGAGTCGGTGGACAAATC, for *msl2* FP-  
771 GTCACACTGGCTTCGCTCAG and *msl2* RP- CCTGGGCTAGTTACCTGCAA were used.

772

### 773 **Immunoprecipitation**

774 *Nuclear extract preparation:* Male (S2) and female (Kc) cells were grown to a cell concentration  
775 of  $2 \times 10^6$  cells/mL in T25 tissue culture flasks. Cells were scraped from the flask, centrifuged for  
776 5min at 2500rpm at 4°C. Supernatant was removed and cell pellets were washed twice in 5ml of  
777 cold PBS. The washed cell pellets were then resuspended in 5X volume of Buffer A (10mM  
778 HEPES pH7.9, 1.5mM MgCl<sub>2</sub>, 10mM KCl, 0.5mM DTT, 1X Protease inhibitors). Cells were  
779 incubated on ice for 15 minutes before dounce homogenization with an A pestle. Cytoplasmic

780 fraction was collected after centrifugation at 4°C for 20 min at 700xg. The remaining nuclear pellet  
781 was re-suspended in 3 times volume in Buffer B (20mM HEPES pH7.9, 20%Glycerol, 0.5%NP  
782 40, 200mMKCl, 0.5mMEDTA, 1mMEGTA, 1X protease inhibitors). Nuclei after re-suspension  
783 were dounce homogenized with a B pestle. Nuclear debris was then pelleted by centrifugation at  
784 10,000xg for 10 min at 4°C. 1ml aliquots of both cytoplasmic and nuclear fractions were prepared  
785 in 1.5mL Protein LoBind Eppendorf tubes and flash frozen in liquid nitrogen for storage at -80 °C.  
786

787 *Immunoprecipitation:* Magnetic anti-CLAMP beads were prepared to a final concentration of  
788 10mg/mL by coupling rabbit anti-CLAMP antibody (SDIX) to magnetic beads, according to  
789 Dynabeads Antibody coupling kit (ThermoFisher Scientific) instructions. Both prepared anti-  
790 CLAMP and purchased anti-IgG (anti-rabbit IgG M-280 Dynabeads) were blocked to reduce  
791 background the night before the immunoprecipitation. First, the beads were washed 3 times for 5  
792 minutes in 500L Tris-NaCl Wash (50mM Tris, 500mM NaCl, 0.1% NP-40) by rotating at 4C. The  
793 beads were next suspended in block buffer (3.3mg/mL of yeast tRNA extract prepared in 20mM  
794 HEPES, pH7.9, 20% Glycerol, 0.5% NP-40, 200mM KCl, 1mM EDTA, and 2mM EGTA) and  
795 rotated overnight at 4C. The next day, beads were washed 3 times for 5 minutes in the block buffer  
796 without yeast tRNA by rotating at 4°C. After the final wash, beads were resuspended in the same  
797 amount of block buffer as the starting volume.

798  
799 To 1mL of previously prepared nuclear extract, 100uL of blocked anti-CLAMP or anti-IgG  
800 magnetic Dynabeads were added. The nuclear extracts and beads were then rotated for 1 hour at  
801 4°C. Afterward, the beads were collected and the supernatant discarded. The beads were then  
802 washed three times in Tris-NaCl wash (50mM Tris, 500mM NaCl, 0.1% NP-40) by rotating for 5  
803 minutes at 4°C and cleared by using a magnetic rack. To elute proteins from the beads, 100uL of  
804 1% SDS was added, and the beads were boiled for 10 minutes at 95C. To the eluate, 300uL of  
805 ultrapure water was added, and the tubes gently vortexed. After collecting the beads on a magnetic  
806 rack, the eluate was saved in a clean Protein LoBind Eppendorf tube.

807  
808 *Western blotting:* Squid and Hrb27C were detected in IP-CLAMP and IGG-rabbit protein samples  
809 using mouse anti-Squid (1:500, 1B11, DSHB) and rabbit anti-Hrb27C (1:5000, Fatima Gebauer),  
810 performed as mentioned above under western blotting protocol.

811  
812 **CUT&RUN**  
813 0-2 hr and 2-4 hr male and female embryos of desired genotypes (~50 each) were collected on  
814 standard grape juice agar medium and washed with water. The embryos were dechorionated in 6%  
815 bleaching solution for 2 min and washed twice in ice cold 1XPBS. Centrifuged at 12,000g for 10  
816 min at 4°C. Supernatants were discarded and embryos resuspended in 200µl Dig-Wash buffer with  
817 EDTA (20mM HEPES-NaOH, 150mM NaCl, 2mM EDTA, 0.5mM Spermidine, 10mM PMSF,  
818 0.05% digitonin) and washed twice. Embryos were incubated in 200µl primary antibody overnight  
819 at 4°C on a tube rotator. Next, embryos were centrifuged at 12,000g for 10 min at 4°C and liquid  
820 removed and embryos were washed twice in Dig-Wash buffer with EDTA. Then, embryos were  
821 incubated for 3 hours at 4°C in ~700 ng/ml pAMNase solution in Dig-Wash buffer with EDTA.  
822 Embryos were washed twice in Dig-Wash buffer without EDTA and resuspended in 150µl of Dig-  
823 Wash buffer without EDTA. Samples were equilibrated to 0°C on a heat block maintained on ice-  
824 bath. 2µl of 100mM CaCl<sub>2</sub> added to each sample to initiate MNase activity and digestion was  
825 performed for 30 min before adding 150µl of 2X RSTOP Buffer (200mM NaCl, 20mM EDTA,  
826 4mM EGTA, 50ug/ml RNase, 40ug/ml glycogen, 10pg/ml yeast spike-in DNA) to stop the  
827 reaction. Incubated at 37°C for 10 minutes to release the DNA fragments. Samples were spun at  
828 12,000g for 10 minutes and aqueous layer transferred to a fresh 1.5 ml microfuge tube and  
829 centrifuged at 16,000g for 5 minutes. Cleared liquid was again transferred to a fresh tube, 1µl of  
830 20% SDS and 2.5µl proteinase K (20ng/ml) added, incubated at 70°C for 10 minutes. 300µl PCI  
831 was added to each tube, mixed and total solution was transferred to phase lock tubes and  
832 centrifuged at 16,000g for 5 minutes. After adding 300µl of chloroform and mixing gently, samples  
833 were centrifuged at 16,000g for 5 minutes at RT. The aqueous layer was transferred to a DNA low  
834 binding tube. 1µl glycogen (5mg/ml) and 750µl ethanol added to precipitate DNA at -80°C.  
835 Samples were centrifuged at 16,000g for 10 min at 4°C and washed in ethanol twice. Pellet air  
836 dried and dissolved in 15µl of 1mM TrisHCl + 0.1mM EDTA pH 8.0<sup>57,58</sup>. 1ng of Cut and Run  
837 DNA was used to make libraries using the KAPA Hyper prep kit and SeqCap adapters A & B  
838 (Roche) according to manufacturer's protocol. For library amplification 14 cycles were used and  
839 a 1.0X SPRI bead cleanup was performed using Agencourt Ampure XP beads. The following

840 antibody concentrations were used: rabbit anti-CLAMP (5µg/sample, SDIX); 1:200 anti-rabbit  
841 (MilliporeSigma); rat anti-MLE (1:50, 6E11); 700ng/ml pA-MNase (from Steven Henikoff).

842

### 843 **iCLIP**

844 Kc and S2 cells were maintained at 25°C in Schneider's media supplemented with 10% Fetal  
845 Bovine Serum and 1.4X Antibiotic-Antimycotic. Cells were passaged every 3 days to maintain an  
846 appropriate cell density. Cells were allowed to grow to confluency and UV crosslinked using  
847 254nm UV light in Stratalinker 2400 on ice (Stratagene, USA). UV treated cells were lysed to get  
848 different cellular fractions (Cytoplasmic, Nucleoplasmic and Chromatin) according to Fr-iCLIP  
849 (fractionation-iCLIP) protocol from Brugiolo et al 2017<sup>85</sup>. Chromatin and Nucleoplasmic fractions  
850 were sonicated with a Branson digital sonicator at 30% amplitude for 30 s total (10 sec on and 20  
851 sec off) to disrupt DNA before IP. All three fractions were separately centrifuged at 20,000 xg for  
852 5 min at 4°C. Fractions were tested by Western blotting using RNAPolI for Chromatin Fraction,  
853 Actin for Cytoplasmic Fraction. Protein quantification for each fraction was done using  
854 manufacturer's protocol for Pierce 660nm protein assay reagent (Thermo Scientific, USA). Each  
855 Fraction was subjected to iCLIP protocol as described in Huppertz et al 2014<sup>51</sup> using rabbit-  
856 CLAMP antibody to immunoprecipitate bound RNAs which were extracted using proteinase K and  
857 phenol:chloroform. Custom cDNA libraries prepared according to Huppertz et al 2014<sup>51</sup> using  
858 distinct primers Rt1clip-Rt16clip for separate samples containing individual 4nt-barcode  
859 sequences that allow multiplexing of samples. cDNA libraries for each sample amplified  
860 separately using 31 cycles of PCR, mixed together later and sequenced using standard illumina  
861 protocols. Heyl et al. 2020<sup>86</sup> methods using the Galaxy CLIP-Explorer were followed to  
862 preprocess, perform quality control, post-process and perform peak calling. Data deposited in GEO  
863 (awaiting accession number).

### 864 **Computational Methods:**

865 **Time2splice tool: see Supplementary methods**

866

867 **Sex-specific splicing event analysis**

868 RNA sequencing data from Rieder et al 2017 (#GSE102922) was analyzed using time2splice to  
869 determine sex-specifically splicing events `dmel-all-r6.29.gtf` from BDGP6 in genomes<sup>87</sup> was used  
870 to map each transcript identifier (ID) to gene ID and symbol, for .bed creation data for the  
871 associated chromosome, transcription start site (TSS) and transcription end site (TES), and strand  
872 information were imported from Illumina  
873 ([https://support.illumina.com/sequencing/sequencing\\_software/igenome.html](https://support.illumina.com/sequencing/sequencing_software/igenome.html)). From the raw data  
874 after quality control i.e, FastQC<sup>88</sup>, Salmon<sup>89</sup> was used to quantify transcript expression for  
875 treatment and control samples. Calculated transcripts per million (TPM) values from SUPPA<sup>42</sup>  
876 were used for all four replicates of female and male controls at both time points (before and after  
877 MZT). Each sample was filtered to include transcripts where the mean value is less than or equal  
878 to 3 TPMs per gene. The number of transcripts included at various thresholds were plotted from 1  
879 to 10 and the fraction of genes filtered out begins to plateau around threshold 3. The percent of  
880 spliced in (PSI) transcripts between females and males were compared at both 0-2 Hr (pre-MZT)  
881 and 2-4 Hr (post-MZT) (p-value of 0.05), thereby resulting in delta PSI values and p-values for  
882 each transcription in each experimental condition comparison. Given these resulting delta  
883 transcript PSI values, significantly alternatively splice genes (p-value 0.05) were found between  
884 females vs. males 0-2 Hr (pre-MZT) controls to show which genes are normally sex-specifically  
885 spliced pre-MZT. The same process was followed at 2-4 Hr (post-MZT). To then determine the  
886 sex-specifically spliced genes, the female RNAi experiment compared with the control delta PSI  
887 gave the number of total alternative spliced transcripts pre-MZT, then considering those that are  
888 not shared with males, and are only expressed in females normally, this defined our sex specifically  
889 spliced set of genes for females pre-MST. This process was also performed for males pre-MZT.  
890 The same process was followed for post-MZT samples.

891

## 892 **ChIP-seq: Data analysis**

893

894 We used preprocessed ChIP-seq data from Rieder et al 2019 (#GSE133637), specifically the .bw  
895 and .broadPeak.gz files in our analysis using ChIPseeker<sup>90</sup> and deeptools<sup>91</sup>. Specifically, when  
896 plotting the average profiles using deeptools, we achieved a baseline signal representing genome-  
897 wide binding taking into consideration the number of genes in other groups by the following  
898 procedure: of all genes that are on (no zero read-count genes), we sampled the number of the

899 largest other group (to which we are comparing), and ran computeMatrix on that subset. This  
900 process was repeated 500 times and the resulting 500 matrices were averaged to produce a  
901 representative signal. For motif analysis MEME<sup>92</sup> suite was used.

902

### 903 **Cut and Run: Data analysis**

904

905 Sequenced reads were run through FASTQC<sup>88</sup>(fastqc replicate\_R1\_001.fastq.gz  
906 replicate\_R2\_001.fastq.gz) with default parameters to check the quality of raw sequence data and  
907 filter out any sequences flagged for poor quality. Sequences were trimmed and reassessed for  
908 quality using TrimGalore (<https://github.com/FelixKrueger/TrimGalore/issues/25>) and FastQC<sup>88</sup>,  
909 respectively. All Illumina lanes of the same flow cell .fastq files were merged, and sequenced reads  
910 were then mapped to release 6 *Drosophila melanogaster* genome (dm6). We compared Bowtie2<sup>93</sup>,  
911 HISAT2<sup>94</sup>, and BWA<sup>95</sup>. We found the best alignment quality with BWA and thus used this  
912 method's results downstream. Next, we performed conversion to bam and sorting (e.g. using:  
913 bowtie2 -x dm6\_genome -1 replicate\_R1\_001.fastq.gz -2 replicate\_R2\_001.fastq.gz -S out.sam >  
914 stout.txt 2> alignment\_info.txt; samtools view -bS out.sam > out.bam; rm -rf out.sam; samtools  
915 sort out.bam -o out.sorted.bam). We removed reads (using samtools) with a MAPQ less than 30  
916 and any reads with PCR duplicate reads (identified using MarkDuplicates Picard -2.20.2). Peaks  
917 identified using MACS2<sup>96</sup>( macs2 callpeak -t out.sorted.bam -B -f BAM --nomodel --SPMR --  
918 keep-dup all -g dm --trackline -n outname --cutoff-analysis --call-summits -p 0.01 --outdir outdir)  
919 and keep duplicates separate. To calculate fold-enrichment macs2 is run again (macs2 bdgcmp -t  
920 \$treat -c \$control -o \$out.sorted.bam\_FE.bdg -m FE 2> \$ out.sorted.bam\_FE.log; macs2 bdgcmp  
921 -t \$treat -c \$control -o \$out.sorted.bam\_logLR.bdg -m logLR -p 0.00001 2). For motif analysis  
922 MEME<sup>92</sup> suite was used. Data submitted in GEO repository (#GSE174781).

923

### 924 **iCLIP: Data analysis**

925

926 Heyl et al. 2020<sup>86</sup> methods using the Galaxy CLIP-Explorer were followed to preprocess, perform  
927 quality control, post-process and perform peak calling. For preprocessing UMI-Tools was used,  
928 and then UMI-tools and Cutadapt used for Adapter, Barcode and UMI-removal. Cutadapt (Galaxy  
929 version 3.5) was used for filtering with a custom adapter sequence

930 AGATCGGAAGAGCGGTTCAGCAGGAATGCCGAGACCGATCTCGTATGCCGTCTTCT  
931 GCTTG. All other settings followed the Heyl et al 2020 Galaxy iCLIP-explorer workflow. UMI-  
932 Tools Extract (Galaxy Version 1.1.2+galaxy2) was then used with a barcode pattern of  
933 NNNXXXXNN. No unpaired reads were allowed. The barcode was on the 3' end. Je-Demultiplex  
934 (Galaxy Version 1.2.1) was then used for demultiplexing. FastQC was used for quality control.  
935 Mapping was done by RNA STAR (Galaxy version 2.5.2b-2) using dm6. All settings were chosen  
936 based on the existing parameters from the iCLIP-explorer settings. We selected FALSE for the  
937 option to use end-to-end read alignments with no soft-clipping. bedtools used for Read-Filtering,  
938 and UMI-Tools (Galaxy version 0.5.3.0) for de-duplication. PEAKachu was used for Peak Calling  
939 to generate bed files. The PEAKachu settings were followed using the Galaxy CLIP-explorer  
940 workflow. The maximum insert size was set to 150, the minimum cluster expression fraction was  
941 set to 0.01, the minimum block overlap set to 0.5, the minimum block expression set to 0.1. The  
942 Mad Multiplier was set to 0.0, the Fold Change Threshold was set to 2.0, and the adjusted p-value  
943 threshold was set to 0.05. Peaks were annotated using RCAS<sup>97</sup> (RNA Centric Annotation System),  
944 a R package using Rstudio. MEME Suite used for motif detection. RCAS was used for functional  
945 analysis of the transcriptomes isolated by iCLIP, such as transcript features. ShinyGO 0.76<sup>98</sup> was  
946 used to perform Gene Ontology Analysis of the iCLIP data.

947

#### 948 **Competing Interest Statement**

949

950 The authors declare no conflicting interests.

951

#### 952 **Acknowledgments**

953

954 This work and funding to M.R. was supported by R35GM126994 to E.N.L. from NIH. A.M.C is  
955 funded by the NSF Graduate Research Fellowship and CCMB, Brown University. We thank  
956 Bloomington stock center for fly lines. We thank Leila Rieder for SD and Rsp<sup>s</sup> stocks, Peter Becker  
957 for MSL2 and MLE antibodies, Steve Henikoff for pAMNase protein and spike-in DNA for Cut  
958 and Run, and Daniel J McKay for sharing his Cut and Run protocol for tissues.

959

960



961  
962  
963  
964  
965  
966  
967  
968  
969  
970  
971  
972  
973  
974  
975  
976  
977  
978  
979  
980  
981  
982  
983  
984  
985  
986  
987  
988  
989  
990  
991

**Author Contributions**

M.R., A.M.C. and E.N.L. planned experiments, analyzed results and wrote the manuscript. A.M.C did all the computational analysis. M.R. carried out the experimental work and collected data for Cut and Run, Polytene squashes and IF, splicing assays and IP. J.U. carried out sex determination pathway splicing assays and WB. JA analyzed the MLE cut and run data. A.H analyzed the iCLIP-seq data.

992

993

994 **References**

- 995 1. Aanes, H. *et al.* Differential transcript isoform usage pre-and post-zygotic genome  
996 activation in zebrafish. *BMC genomics* **14**, 331 (2013).
- 997 2. Revil, T., Gaffney, D., Dias, C., Majewski, J. & Jerome-Majewska, L.A. Alternative splicing  
998 is frequent during early embryonic development in mouse. *BMC genomics* **11**, 399  
999 (2010).
- 1000 3. Mayne, B.T. *et al.* Large scale gene expression meta-analysis reveals tissue-specific, sex-  
1001 biased gene expression in humans. *Frontiers in genetics* **7**, 183 (2016).
- 1002 4. Ober, C., Loisel, D.A. & Gilad, Y. Sex-specific genetic architecture of human disease.  
1003 *Nature Reviews Genetics* **9**, 911-922 (2008).
- 1004 5. Wang, G.-S. & Cooper, T.A. Splicing in disease: disruption of the splicing code and the  
1005 decoding machinery. *Nature Reviews Genetics* **8**, 749-761 (2007).
- 1006 6. Faustino, N.A. & Cooper, T.A. Pre-mRNA splicing and human disease. *Genes &*  
1007 *development* **17**, 419-437 (2003).
- 1008 7. Schulz, K.N. *et al.* Zelda is differentially required for chromatin accessibility, transcription  
1009 factor binding, and gene expression in the early *Drosophila* embryo. *Genome research*  
1010 **25**, 1715-1726 (2015).
- 1011 8. Schulz, K.N. & Harrison, M.M. Mechanisms regulating zygotic genome activation. *Nature*  
1012 *Reviews Genetics* **20**, 221-234 (2019).
- 1013 9. Rieder, L.E. *et al.* Histone locus regulation by the *Drosophila* dosage compensation  
1014 adaptor protein CLAMP. *Genes & development* **31**, 1494-1508 (2017).
- 1015 10. Artieri, C.G. & Fraser, H.B. Transcript length mediates developmental timing of gene  
1016 expression across *Drosophila*. *Molecular biology and evolution* **31**, 2879-2889 (2014).
- 1017 11. De Renzis, S., Elemento, O., Tavazoie, S. & Wieschaus, E.F. Unmasking activation of the  
1018 zygotic genome using chromosomal deletions in the *Drosophila* embryo. *PLoS Biol* **5**,  
1019 e117 (2007).
- 1020 12. Guilgur, L.G. *et al.* Requirement for highly efficient pre-mRNA splicing during *Drosophila*  
1021 early embryonic development. *Elife* **3**, e02181 (2014).
- 1022 13. Förch, P. & Valcárcel, J. Splicing regulation in *Drosophila* sex determination. in  
1023 *Regulation of Alternative Splicing* 127-151 (Springer, 2003).
- 1024 14. Haussmann, I.U. *et al.* m 6 A potentiates Sxl alternative pre-mRNA splicing for robust  
1025 *Drosophila* sex determination. *Nature* **540**, 301-304 (2016).
- 1026 15. Salz, H. & Erickson, J.W. Sex determination in *Drosophila*: The view from the top. *Fly* **4**,  
1027 60-70 (2010).
- 1028 16. Estes, P.A., Keyes, L.N. & Schedl, P. Multiple response elements in the Sex-lethal early  
1029 promoter ensure its female-specific expression pattern. *Molecular and Cellular Biology*  
1030 **15**, 904-917 (1995).
- 1031 17. González, A.N., Lu, H. & Erickson, J.W. A shared enhancer controls a temporal switch  
1032 between promoters during *Drosophila* primary sex determination. *Proceedings of the*  
1033 *National Academy of Sciences* **105**, 18436-18441 (2008).

- 1034 18. Keyes, L.N., Cline, T.W. & Schedl, P. The primary sex determination signal of *Drosophila*  
1035 acts at the level of transcription. *Cell* **68**, 933-943 (1992).
- 1036 19. Salz, H.K. Male or female? The answer depends on when you ask. *PLoS Biol* **5**, e335  
1037 (2007).
- 1038 20. Penalva, L.O. & Sánchez, L. RNA binding protein sex-lethal (Sxl) and control of *Drosophila*  
1039 sex determination and dosage compensation. *Microbiology and molecular biology*  
1040 *reviews* **67**, 343-359 (2003).
- 1041 21. Rieder, L.E., Jordan III, W.T. & Larschan, E.N. Targeting of the dosage-compensated male  
1042 X-chromosome during early *Drosophila* development. *Cell reports* **29**, 4268-4275. e2  
1043 (2019).
- 1044 22. Prayitno, K., Schauer, T., Regnard, C. & Becker, P.B. Progressive dosage compensation  
1045 during *Drosophila* embryogenesis is reflected by gene arrangement. *EMBO reports* **20**,  
1046 e48138 (2019).
- 1047 23. Gebauer, F., Merendino, L., Hentze, M.W. & Valcárcel, J. The *Drosophila* splicing  
1048 regulator sex-lethal directly inhibits translation of male-specific-lethal 2 mRNA. *Rna* **4**,  
1049 142-150 (1998).
- 1050 24. Alekseyenko, A.A. *et al.* A sequence motif within chromatin entry sites directs MSL  
1051 establishment on the *Drosophila* X chromosome. *Cell* **134**, 599-609 (2008).
- 1052 25. Straub, T., Zabel, A., Gilfillan, G.D., Feller, C. & Becker, P.B. Different chromatin  
1053 interfaces of the *Drosophila* dosage compensation complex revealed by high-shear ChIP-  
1054 seq. *Genome research* **23**, 473-485 (2013).
- 1055 26. Urban, J. *et al.* Enhanced chromatin accessibility of the dosage compensated *Drosophila*  
1056 male X-chromosome requires the CLAMP zinc finger protein. *PLoS one* **12**, e0186855  
1057 (2017).
- 1058 27. Duan, J.E. *et al.* CLAMP and Zelda function together as pioneer transcription factors to  
1059 promote *Drosophila* zygotic genome activation. *bioRxiv* (2020).
- 1060 28. Albig, C. *et al.* Factor cooperation for chromosome discrimination in *Drosophila*. *Nucleic*  
1061 *acids research* **47**, 1706-1724 (2019).
- 1062 29. Larschan, E. *et al.* X chromosome dosage compensation via enhanced transcriptional  
1063 elongation in *Drosophila*. *Nature* **471**, 115-118 (2011).
- 1064 30. Kuroda, M.I., Kernan, M.J., Kreber, R., Ganetzky, B. & Baker, B.S. The maleless protein  
1065 associates with the X chromosome to regulate dosage compensation in *Drosophila*. *Cell*  
1066 **66**, 935-947 (1991).
- 1067 31. Ankush Jagtap, P.K. *et al.* Structure, dynamics and roX2-lncRNA binding of tandem  
1068 double-stranded RNA binding domains dsRBD1, 2 of *Drosophila* helicase Maleless.  
1069 *Nucleic acids research* **47**, 4319-4333 (2019).
- 1070 32. Cugusi, S., Kallappagoudar, S., Ling, H. & Lucchesi, J.C. The *Drosophila* helicase maleless  
1071 (MLE) is implicated in functions distinct from its role in dosage compensation. *Molecular*  
1072 *& Cellular Proteomics* **14**, 1478-1488 (2015).
- 1073 33. Soruco, M.M. *et al.* The CLAMP protein links the MSL complex to the X chromosome  
1074 during *Drosophila* dosage compensation. *Genes & development* **27**, 1551-1556 (2013).
- 1075 34. Kaye, E.G. *et al.* Differential occupancy of two GA-binding proteins promotes targeting  
1076 of the *Drosophila* dosage compensation complex to the male X chromosome. *Cell*  
1077 *reports* **22**, 3227-3239 (2018).

- 1078 35. Quinn, J.J. *et al.* Rapid evolutionary turnover underlies conserved lncRNA–genome  
1079 interactions. *Genes & development* **30**, 191-207 (2016).
- 1080 36. Urban, J.A., Urban, J.M., Kuzu, G. & Larschan, E.N. The Drosophila CLAMP protein  
1081 associates with diverse proteins on chromatin. *PLoS one* **12**, e0189772 (2017).
- 1082 37. Lott, S.E., Villalta, J.E., Zhou, Q., Bachtrog, D. & Eisen, M.B. Sex-specific embryonic gene  
1083 expression in species with newly evolved sex chromosomes. *PLoS Genet* **10**, e1004159  
1084 (2014).
- 1085 38. Telonis-Scott, M., Kopp, A., Wayne, M.L., Nuzhdin, S.V. & McIntyre, L.M. Sex-specific  
1086 splicing in Drosophila: widespread occurrence, tissue specificity and evolutionary  
1087 conservation. *Genetics* **181**, 421-434 (2009).
- 1088 39. Paris, M., Villalta, J.E., Eisen, M.B. & Lott, S.E. Sex bias and maternal contribution to gene  
1089 expression divergence in Drosophila blastoderm embryos. *PLoS Genet* **11**, e1005592  
1090 (2015).
- 1091 40. Lott, S.E. *et al.* Noncanonical compensation of zygotic X transcription in early Drosophila  
1092 melanogaster development revealed through single-embryo RNA-seq. *PLoS Biol* **9**,  
1093 e1000590 (2011).
- 1094 41. Gibilisco, L., Zhou, Q., Mahajan, S. & Bachtrog, D. Alternative splicing within and  
1095 between Drosophila species, sexes, tissues, and developmental stages. *PLoS genetics* **12**,  
1096 e1006464 (2016).
- 1097 42. Trincado, J.L. *et al.* SUPPA2: fast, accurate, and uncertainty-aware differential splicing  
1098 analysis across multiple conditions. *Genome biology* **19**, 1-11 (2018).
- 1099 43. Brooks, A.N. *et al.* Regulation of alternative splicing in Drosophila by 56 RNA binding  
1100 proteins. *Genome research* **25**, 1771-1780 (2015).
- 1101 44. Urban, J.A. *et al.* The essential Drosophila CLAMP protein differentially regulates non-  
1102 coding roX RNAs in male and females. *Chromosome Research* **25**, 101-113 (2017).
- 1103 45. Atallah, J. & Lott, S.E. Evolution of maternal and zygotic mRNA complements in the early  
1104 Drosophila embryo. *PLoS genetics* **14**, e1007838 (2018).
- 1105 46. Kwasnieski, J.C., Orr-Weaver, T.L. & Bartel, D.P. Early genome activation in Drosophila is  
1106 extensive with an initial tendency for aborted transcripts and retained introns. *Genome*  
1107 *research* **29**, 1188-1197 (2019).
- 1108 47. Gutierrez-Perez, I. *et al.* Ecdysone-induced 3D chromatin reorganization involves active  
1109 enhancers bound by Pipsqueak and Polycomb. *Cell reports* **28**, 2715-2727. e5 (2019).
- 1110 48. Duan, J.E. *et al.* CLAMP and Zelda function together to promote Drosophila zygotic  
1111 genome activation. *elife* **10**, 2020.07. 15.205054 (2021).
- 1112 49. Harrison, A.F. & Shorter, J. RNA-binding proteins with prion-like domains in health and  
1113 disease. *Biochemical Journal* **474**, 1417-1438 (2017).
- 1114 50. March, Z.M., King, O.D. & Shorter, J. Prion-like domains as epigenetic regulators,  
1115 scaffolds for subcellular organization, and drivers of neurodegenerative disease. *Brain*  
1116 *research* **1647**, 9-18 (2016).
- 1117 51. Huppertz, I. *et al.* iCLIP: protein–RNA interactions at nucleotide resolution. *Methods* **65**,  
1118 274-287 (2014).
- 1119 52. Cugusi, S., Li, Y., Jin, P. & Lucchesi, J.C. The Drosophila helicase MLE targets hairpin  
1120 structures in genomic transcripts. *PLoS genetics* **12**, e1005761 (2016).

- 1121 53. Reenan, R.A., Hanrahan, C.J. & Ganetzky, B. The mlenapts RNA helicase mutation in  
1122 *Drosophila* results in a splicing catastrophe of the para Na<sup>+</sup> channel transcript in a  
1123 region of RNA editing. *Neuron* **25**, 139-149 (2000).
- 1124 54. Herold, N. *et al.* Conservation of the protein composition and electron microscopy  
1125 structure of *Drosophila melanogaster* and human spliceosomal complexes. *Molecular*  
1126 *and cellular biology* **29**, 281-301 (2009).
- 1127 55. Lindehell, H., Kim, M. & Larsson, J. Proximity ligation assays of protein and RNA  
1128 interactions in the male-specific lethal complex on *Drosophila melanogaster* polytene  
1129 chromosomes. *Chromosoma* **124**, 385-395 (2015).
- 1130 56. Quinn, J.J. *et al.* Revealing long noncoding RNA architecture and functions using domain-  
1131 specific chromatin isolation by RNA purification. *Nature biotechnology* **32**, 933-940  
1132 (2014).
- 1133 57. Skene, P.J., Henikoff, J.G. & Henikoff, S. Targeted in situ genome-wide profiling with high  
1134 efficiency for low cell numbers. *Nature protocols* **13**, 1006 (2018).
- 1135 58. Uyehara, C.M. & McKay, D.J. Direct and widespread role for the nuclear receptor EcR in  
1136 mediating the response to ecdysone in *Drosophila*. *Proceedings of the National*  
1137 *Academy of Sciences* **116**, 9893-9902 (2019).
- 1138 59. Gabellini, N. A polymorphic GT repeat from the human cardiac Na<sup>+</sup> Ca<sup>2+</sup> exchanger  
1139 intron 2 activates splicing. *European Journal of Biochemistry* **268**, 1076-1083 (2001).
- 1140 60. Hefferon, T.W., Groman, J.D., Yurk, C.E. & Cutting, G.R. A variable dinucleotide repeat in  
1141 the CFTR gene contributes to phenotype diversity by forming RNA secondary structures  
1142 that alter splicing. *Proceedings of the National Academy of Sciences* **101**, 3504-3509  
1143 (2004).
- 1144 61. Lin, C.-L. *et al.* RNA structure replaces the need for U2AF2 in splicing. *Genome research*  
1145 **26**, 12-23 (2016).
- 1146 62. Hartmann, B. *et al.* Distinct regulatory programs establish widespread sex-specific  
1147 alternative splicing in *Drosophila melanogaster*. *Rna* **17**, 453-468 (2011).
- 1148 63. Blanchette, M. *et al.* Genome-wide analysis of alternative pre-mRNA splicing and RNA-  
1149 binding specificities of the *Drosophila* hnRNP A/B family members. *Molecular cell* **33**,  
1150 438-449 (2009).
- 1151 64. Bell, L.R., Horabin, J.I., Schedl, P. & Cline, T.W. Positive autoregulation of sex-lethal by  
1152 alternative splicing maintains the female determined state in *Drosophila*. *Cell* **65**, 229-  
1153 239 (1991).
- 1154 65. Moschall, R. *et al.* *Drosophila* Sister-of-Sex-lethal reinforces a male-specific gene  
1155 expression pattern by controlling Sex-lethal alternative splicing. *Nucleic acids research*  
1156 **47**, 2276-2288 (2019).
- 1157 66. Coschigano, K.T. & Wensink, P.C. Sex-specific transcriptional regulation by the male and  
1158 female doublesex proteins of *Drosophila*. *Genes & development* **7**, 42-54 (1993).
- 1159 67. Nagoshi, R.N. & Baker, B.S. Regulation of sex-specific RNA splicing at the *Drosophila*  
1160 doublesex gene: cis-acting mutations in exon sequences alter sex-specific RNA splicing  
1161 patterns. *Genes & development* **4**, 89-97 (1990).
- 1162 68. Bell, L.R., Maine, E.M., Schedl, P. & Cline, T.W. Sex-lethal, a *Drosophila* sex  
1163 determination switch gene, exhibits sex-specific RNA splicing and sequence similarity to  
1164 RNA binding proteins. *Cell* **55**, 1037-1046 (1988).

- 1165 69. Salz, H.K. *et al.* The Drosophila female-specific sex-determination gene, Sex-lethal, has  
1166 stage-, tissue-, and sex-specific RNAs suggesting multiple modes of regulation. *Genes &*  
1167 *development* **3**, 708-719 (1989).
- 1168 70. Samuels, M.E., Schedl, P. & Cline, T.W. The complex set of late transcripts from the  
1169 Drosophila sex determination gene sex-lethal encodes multiple related polypeptides.  
1170 *Molecular and cellular biology* **11**, 3584-3602 (1991).
- 1171 71. Petrova, V. *et al.* Chromatin accessibility regulates intron retention in a cell type-specific  
1172 manner. *bioRxiv* (2021).
- 1173 72. Agirre, E., Oldfield, A., Bellora, N., Segelle, A. & Luco, R. Splicing-associated chromatin  
1174 signatures: a combinatorial and position-dependent role for histone marks in splicing  
1175 definition. *Nature communications* **12**, 1-16 (2021).
- 1176 73. Venables, J.P., Tazi, J. & Juge, F. Regulated functional alternative splicing in Drosophila.  
1177 *Nucleic acids research* **40**, 1-10 (2012).
- 1178 74. Blencowe, B.J. Alternative splicing: new insights from global analyses. *Cell* **126**, 37-47  
1179 (2006).
- 1180 75. Ranz, J.M., Castillo-Davis, C.I., Meiklejohn, C.D. & Hartl, D.L. Sex-dependent gene  
1181 expression and evolution of the Drosophila transcriptome. *Science* **300**, 1742-1745  
1182 (2003).
- 1183 76. Zhang, Y., Sturgill, D., Parisi, M., Kumar, S. & Oliver, B. Constraint and turnover in sex-  
1184 biased gene expression in the genus Drosophila. *Nature* **450**, 233-237 (2007).
- 1185 77. Sun, X. *et al.* Sxl-Dependent, tra/tra2-Independent Alternative Splicing of the Drosophila  
1186 melanogaster X-Linked Gene found in neurons. *G3: Genes, Genomes, Genetics* **5**, 2865-  
1187 2874 (2015).
- 1188 78. Arbeitman, M.N., Fleming, A.A., Siegal, M.L., Null, B.H. & Baker, B.S. A genomic analysis  
1189 of Drosophila somatic sexual differentiation and its regulation. *Development* **131**, 2007-  
1190 2021 (2004).
- 1191 79. Lv, M. *et al.* Structural insights reveal the specific recognition of roX RNA by the dsRNA-  
1192 binding domains of the RNA helicase MLE and its indispensable role in dosage  
1193 compensation in Drosophila. *Nucleic acids research* **47**, 3142-3157 (2019).
- 1194 80. Bag, I., Dale, R.K., Palmer, C. & Lei, E.P. The zinc-finger protein CLAMP promotes gypsy  
1195 chromatin insulator function in Drosophila. *Journal of cell science* **132**(2019).
- 1196 81. Jordan, W. & Larschan, E. The zinc finger protein CLAMP promotes long-range chromatin  
1197 interactions that mediate dosage compensation of the Drosophila male X-chromosome.  
1198 *bioRxiv* (2020).
- 1199 82. Vernes, S.C. Genome wide identification of Fruitless targets suggests a role in  
1200 upregulating genes important for neural circuit formation. *Scientific Reports* **4**, 4412  
1201 (2014).
- 1202 83. Jai, Y.Y., Kanai, M.I., Demir, E., Jefferis, G.S. & Dickson, B.J. Cellular organization of the  
1203 neural circuit that drives Drosophila courtship behavior. *Current biology* **20**, 1602-1614  
1204 (2010).
- 1205 84. Schneider, C.A., Rasband, W.S. & Eliceiri, K.W. NIH Image to ImageJ: 25 years of image  
1206 analysis. *Nature methods* **9**, 671-675 (2012).

- 1207 85. Brugiolo, M., Botti, V., Liu, N., Müller-McNicoll, M. & Neugebauer, K.M. Fractionation  
1208 iCLIP detects persistent SR protein binding to conserved, retained introns in chromatin,  
1209 nucleoplasm and cytoplasm. *Nucleic acids research* **45**, 10452-10465 (2017).
- 1210 86. Heyl, F., Maticzka, D., Uhl, M. & Backofen, R. Galaxy CLIP-Explorer: a web server for  
1211 CLIP-Seq data analysis. *GigaScience* **9**, giaa108 (2020).
- 1212 87. DePristo, M.A. *et al.* A framework for variation discovery and genotyping using next-  
1213 generation DNA sequencing data. *Nature genetics* **43**, 491 (2011).
- 1214 88. Andrews, S. FastQC: a quality control tool for high throughput sequence data.  
1215 (Babraham Bioinformatics, Babraham Institute, Cambridge, United Kingdom, 2010).
- 1216 89. Patro, R., Duggal, G., Love, M.I., Irizarry, R.A. & Kingsford, C. Salmon provides fast and  
1217 bias-aware quantification of transcript expression. *Nature methods* **14**, 417-419 (2017).
- 1218 90. Yu, G., Wang, L.-G. & He, Q.-Y. ChIPseeker: an R/Bioconductor package for ChIP peak  
1219 annotation, comparison and visualization. *Bioinformatics* **31**, 2382-2383 (2015).
- 1220 91. Ramírez, F., Dündar, F., Diehl, S., Grüning, B.A. & Manke, T. deepTools: a flexible  
1221 platform for exploring deep-sequencing data. *Nucleic acids research* **42**, W187-W191  
1222 (2014).
- 1223 92. Bailey, T.L., Johnson, J., Grant, C.E. & Noble, W.S. The MEME suite. *Nucleic acids*  
1224 *research* **43**, W39-W49 (2015).
- 1225 93. Langmead, B. & Salzberg, S.L. Fast gapped-read alignment with Bowtie 2. *Nature*  
1226 *methods* **9**, 357 (2012).
- 1227 94. Kim, D., Paggi, J.M., Park, C., Bennett, C. & Salzberg, S.L. Graph-based genome alignment  
1228 and genotyping with HISAT2 and HISAT-genotype. *Nature biotechnology* **37**, 907-915  
1229 (2019).
- 1230 95. Li, H. & Durbin, R. Fast and accurate short read alignment with Burrows–Wheeler  
1231 transform. *bioinformatics* **25**, 1754-1760 (2009).
- 1232 96. Zhang, Y. *et al.* Model-based analysis of ChIP-Seq (MACS). *Genome biology* **9**, 1-9 (2008).
- 1233 97. Uyar, B. *et al.* RCAS: an RNA centric annotation system for transcriptome-wide regions  
1234 of interest. *Nucleic acids research* **45**, e91-e91 (2017).
- 1235 98. Ge, S.X., Jung, D. & Yao, R. ShinyGO: a graphical gene-set enrichment tool for animals  
1236 and plants. *Bioinformatics* **36**, 2628-2629 (2020).

1237

1238

1239

1240

1241

1242

1243

1244

1245

1246

1247 **Fig 1. Alternative splicing during early *Drosophila melanogaster* embryonic development**

1248 **A** Schematic diagram showing 7 different types of Alternative splicing (AS).

1249 **B** Pie chart showing the distribution of different types of AS at 0-2 Hr pre-MZT and 2-4 Hr post-  
1250 MZT for female (red) and male (Blue) embryos in the presence (top row) and absence (bottom  
1251 row) of maternal CLAMP. The total percentage of AS in each category in control embryos is noted  
1252 at the top of the schematic. A Chi-square test was performed to determine if there is a significant  
1253 difference between the percentage of each type of AS including MXE splicing (grey region) in the  
1254 presence vs. absence of CLAMP in each class of sample: females/males 0-2 Hr, and 2-4 Hr  
1255 embryos. A significant difference ( $p < 0.001$  marked by \*\*\*) was found between categories  
1256 connected by solid black lines.

1257

1258

1259

1260

1261

1262

1263

1264

1265

1266

1267

1268

1269

1270

1271

1272

1273

1274

1275

1276



1277 **Fig 2. Maternal CLAMP regulates sex-specific alternative splicing during early embryonic**  
1278 **development.**

1279 **A** Bar graph showing the percentage of transcripts (values noted at the top of each bar) out of total  
1280 AS events or sex-specific splicing events (number of events noted within parentheses at the top of  
1281 each bar) regulated by maternal CLAMP, at the pre-MZT and post-MZT stages, in females (red  
1282 bars) and males (blue bars). A Fischer's Exact Test was performed, with significance at  $p < 0.001$ .

1283 **B** Bar plot showing the total number of splicing events undergoing CLAMP-dependent AS (**N**) in  
1284 females and males at 0-2 Hr pre-MZT and 2-4 Hr post-MZT embryonic stages. Spliced genes are  
1285 divided into non-sex specific (grey) and sex-specific (orange shades) sub-categories of  
1286 genes. CLAMP-dependent female and male sex-specifically spliced (SSS) genes are divided into  
1287 known (darker orange) and new (lighter orange) sub-categories identified in 0-2 Hr pre-MZT and  
1288 2-4 Hr post-MZT embryos.

1289 **C** Percentage of **new** female (red) and male (blue) CLAMP-dependent sex-specifically spliced  
1290 genes in 0-2 Hr pre-MZT and 2-4 Hr post-MZT embryos that were not identified in control  
1291 samples.

1292 **D** Male (blue) and female (brown) CLAMP-dependent sex-specific spliced genes compared with  
1293 maternal genes (**N=841**, magenta) at 0-2 Hr pre-MZT (female, **N=153** and male, **N=99**) and 2-4  
1294 Hr post-MZT stages (female, **N= 270** and male, **N=116**).

1295 **E** Gene ontology results for genes showing CLAMP-dependent female sex-specific splicing in the  
1296 embryo at 0-2 Hr pre-MZT stage and for genes exhibiting CLAMP-dependent female as well as  
1297 male sex-specific splicing in the embryo at the 2-4 Hr post-MZT stage. The size of the circle  
1298 increases as the number of the genes in that category increases. The color of the circle represents  
1299 significance (p-value).

1300

1301

1302

1303

1304

1305

1306

1307 **Fig 3. CLAMP binds along the gene body of female and male sex-specifically spliced genes**  
1308 **at the post-MZT embryonic stage**

1309 **A-B** Average profiles for CLAMP binding at pre-MZT and post-MZT embryonic stages in females  
1310 and males for genes spliced female-specifically (red line) and male-specifically (blue line) during  
1311 the pre-MZT (**A**) and post-MZT (**B**) stages.

1312 **C-D** Average profiles for CLAMP binding to genes expressed in a sex-biased manner in females  
1313 (red line) and males (blue line) during pre-MZT (**C**) and post-MZT (**D**) stage.

1314 Green lines in **A-D** represent CLAMP binding at a random set of active genes used as a control  
1315 (see **Material and Methods** for details). Stippled regions in **A, B** (female, 0-2 Hr pre-MZT) denote  
1316 chromatin around the TSS with more CLAMP binding in female sex-specifically spliced genes vs.  
1317 male sex-specifically spliced genes. The dotted box in **A-D** marks the gene body region in sex-  
1318 specifically spliced and biased expressed genes.

1319

1320

1321

1322

1323

1324

1325

1326

1327

1328

1329

1330

1331

1332

1333

1334

1335

1336

1337

1338 **Fig 4. CLAMP regulates the distribution of MLE on chromatin in males**

1339 **A-B.** Heat maps showing the distribution of MLE at the male (**A**) and female (**B**) specific control  
1340 MLE peaks on the X chromosome and autosomes in male and female 0-2 Hr pre-MZT embryos  
1341 with maternal CLAMP (*MTD-GAL4>GFPRNAi*) and after the loss of maternal CLAMP (*MTD-*  
1342 *GAL4>CLAMP RNAi*).

1343 **C-D.** Venn diagrams and bar plots showing loss and gain of MLE peaks in the presence and  
1344 absence of maternal CLAMP in male 0-2 Hr pre-MZT (**B**) and 2-4 Hr post-MZT (**C**) embryos.  
1345 CLAMP peaks were identified only under control conditions (green circle), whereas MLE peaks  
1346 were identified in the presence (grey circle) and absence (red circle) of maternal CLAMP protein  
1347 depleted using the *MTD-GAL4>CLAMP RNAi* system.

1348

1349

1350

1351

1352

1353

1354

1355

1356

1357

1358

1359

1360

1361

1362

1363

1364

1365

1366

1367

1368 **Fig 5. Alternative splicing of components of the sex determination pathway is regulated by**  
1369 **CLAMP in females**

1370 **A** The sex determination pathway in *Drosophila* is regulated by master regulator SXL.

1371 **B** Electrophoresis gel image (inverted colors) showing splicing of *sxl* transcripts in third instar  
1372 larvae of females and males of genotypes listed in the key (**a-g**) with a representative schematic at  
1373 the top of the gel image.

1374 **C** Western blot showing the level of SXL protein in genotypes (3 replicates for each) mentioned  
1375 below each lane. Tubulin levels were used for protein loading control. Below the blot is the relative  
1376 density of SXL protein compared with Tubulin, with each genotype represented by separate  
1377 colored bars.

1378 **D** Chromatin accessibility measured by the MNase Accessibility (MACC) score is shown across  
1379 the *sxl* gene in male (S2) and female (Kc) cells under control and CLAMP RNAi conditions. The  
1380 MACC score is a previously reported (Urban et al 2017) quantification of chromatin accessibility  
1381 at each locus in the genome. Positive/high accessibility values (blue) indicate high chromatin  
1382 accessibility, and negative/low (red) accessibility values indicate low chromatin accessibility.  
1383 Each window covers MACC values ranging from -0.333 to +1.33. MACC values increase in  
1384 females after CLAMP RNAi, specifically at exon 3 (red box) and are shown in the inset to the  
1385 right. Green boxes represent CLAMP binding peaks in the *sxl* gene just below the schematic for  
1386 the *sxl* gene itself.

1387 **E-F** Electrophoresis gel image from 0-2 Hr embryonic (lane 2-5 & 7-10) and third instar larval  
1388 samples (a-g) showing splicing of *dsx* (E) and *msl2* (F) transcripts in females (lane 3,5,8,10, a-d)  
1389 and males (lane 2,4,7,9, e-g). Embryos were from *MTD-GAL4>GFPRNAi* control (lane 4,5,9,10)  
1390 and *MTD-GAL4>CLAMP RNAi* (lane 2,3,7,8) females. a-g genotypes are the same as in B. The  
1391 schematic at the top of each gel image shows female and male splice variants of *dsx* (E) and *msl2*  
1392 (F) transcripts.

1393 **G** Fluorescent microscopy images of polytene chromosomes from third instar salivary gland in the  
1394 genotypes listed to the left of each panel show the distribution of CLAMP (green) and MSL2 (red)  
1395 on chromatin (blue, DAPI)

1396

1397

1398

1399 **Fig 6. Mechanisms by which CLAMP regulates sex-specific splicing in females and males**

1400 **A** CLAMP regulates splicing in both males and females via directly binding to intronic DNA  
1401 sequences of CLAMP-dependent sex-specifically spliced genes and interaction with some sex-  
1402 specifically spliced genes and spliceosomal RNAs.

1403 **B** CLAMP regulates MLE distribution between the spliceosome and the male X-chromosome  
1404 specific MSL complex in males. CLAMP increases the occupancy of MLE at promoters and CES.  
1405 In the absence of CLAMP, MLE is lost from many sites, including CES and promoters, and is  
1406 gained at new intronic sequences which contain motifs that regulate splicing, resulting in aberrant  
1407 sex-specific splicing in males.

1408 **C** In females, CLAMP binds near the *Sxl*Pe promoter and regulates chromatin accessibility at exon  
1409 three (blue square) of the *sxl* gene and to the *sxl* mRNA. In this way, CLAMP promotes the  
1410 splicing out of exon3 such that functional Sxl protein is formed, which drives female-specific  
1411 splicing events. The absence of CLAMP in females thus results in the aberrant production of non-  
1412 functional male-specific *sxl* transcripts which retain exon3, reducing levels of functional Sxl  
1413 protein. CLAMP and Sxl have shared and distinct RNA targets suggesting that they function by  
1414 both dependent and independent mechanisms.

1415 The three mechanisms proposed in parts **A**, **B**, and **C** are not mutually exclusive and are likely to  
1416 occur simultaneously.

1417

1418

1419

1420

1421

1422

1423

1424

1425

1426

1427

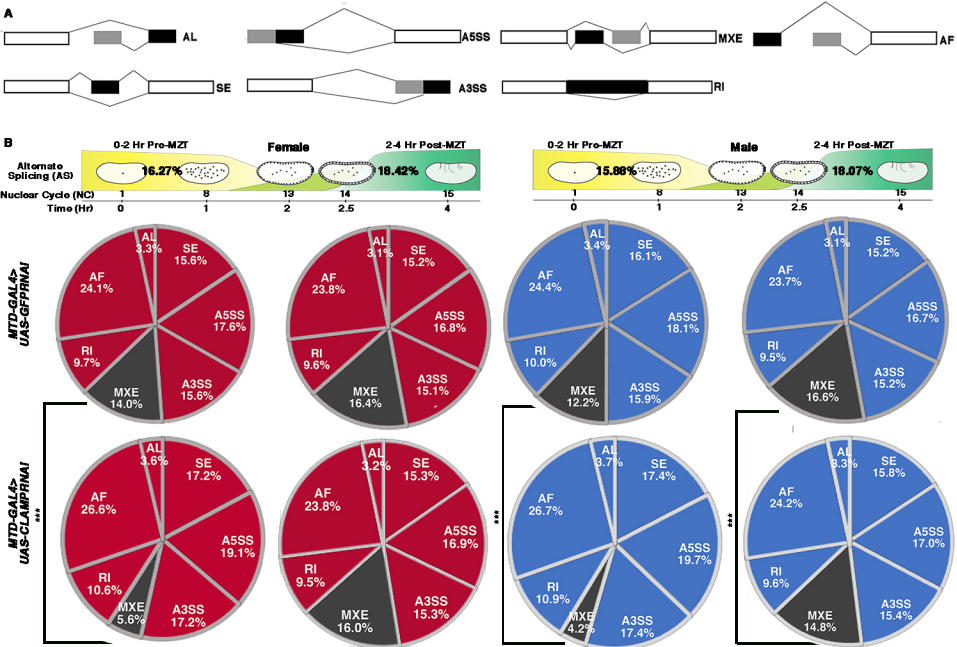

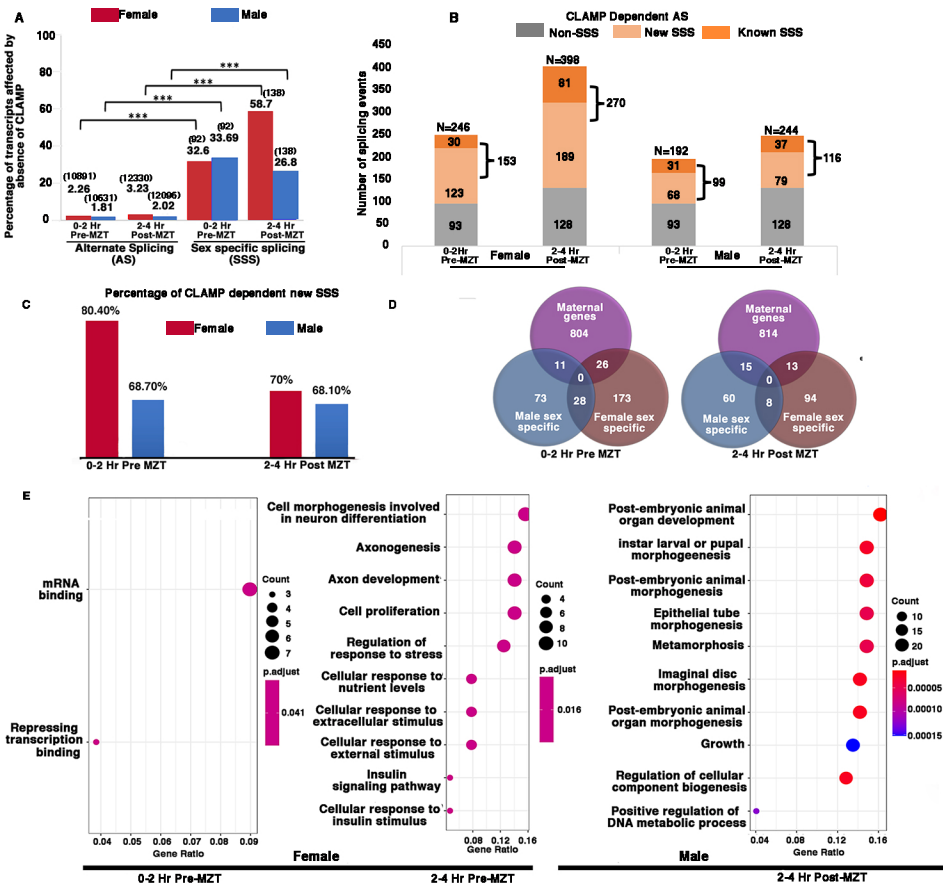

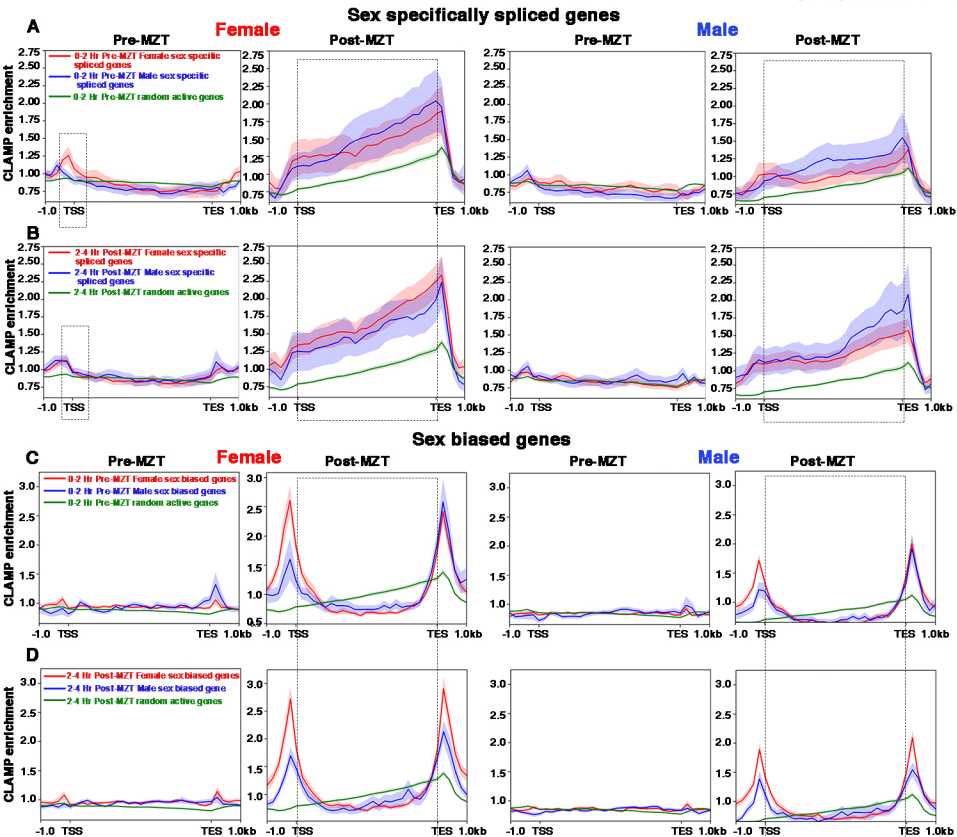



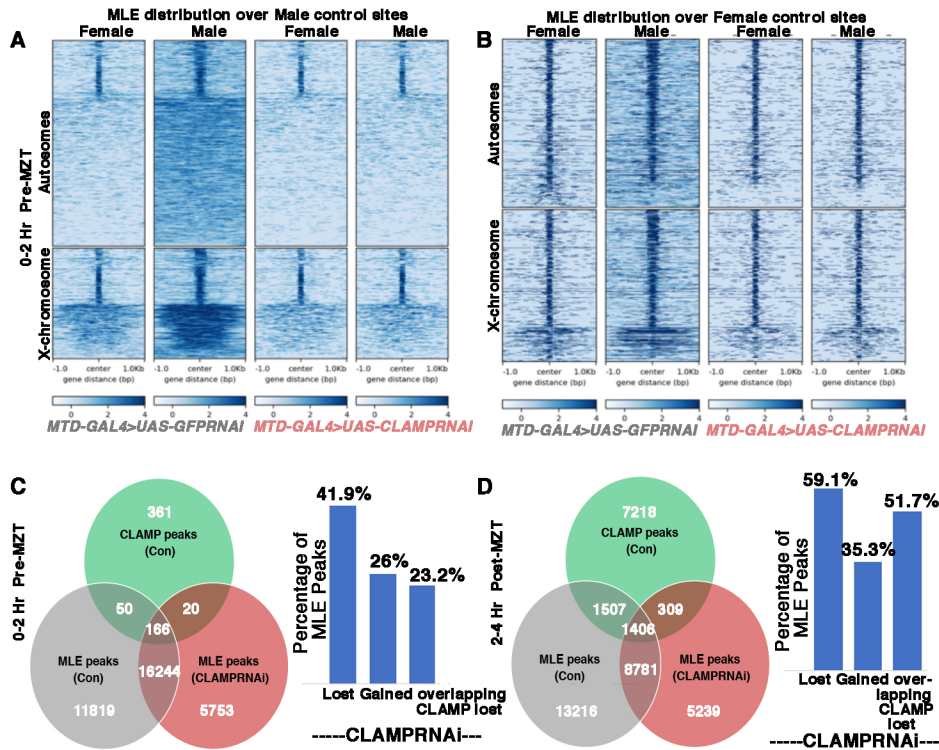

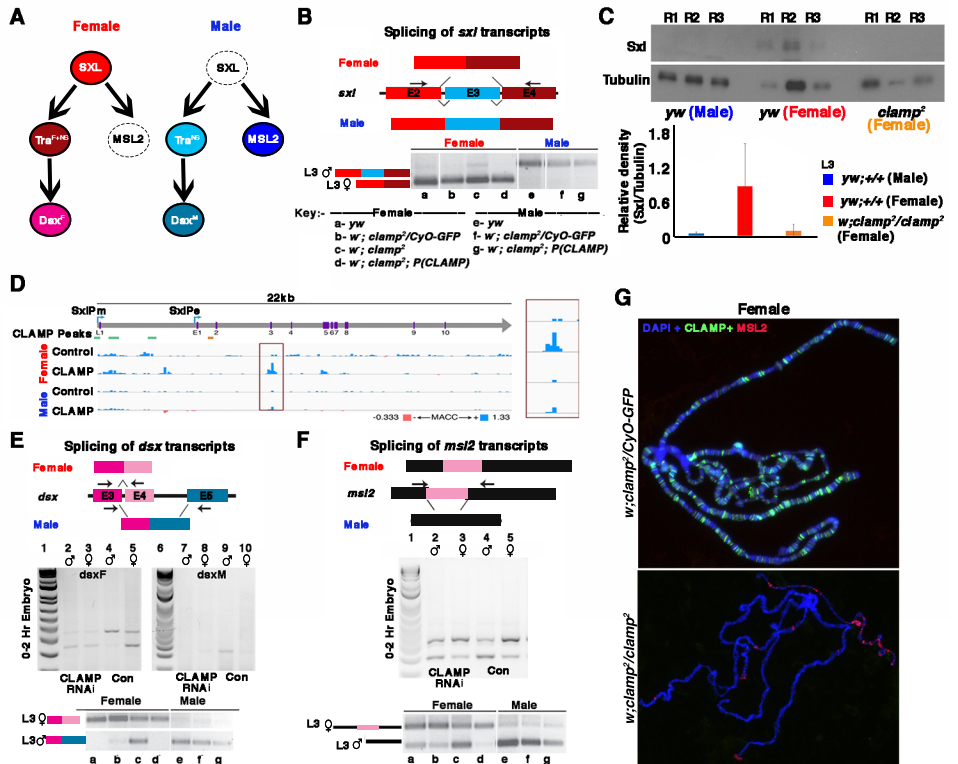

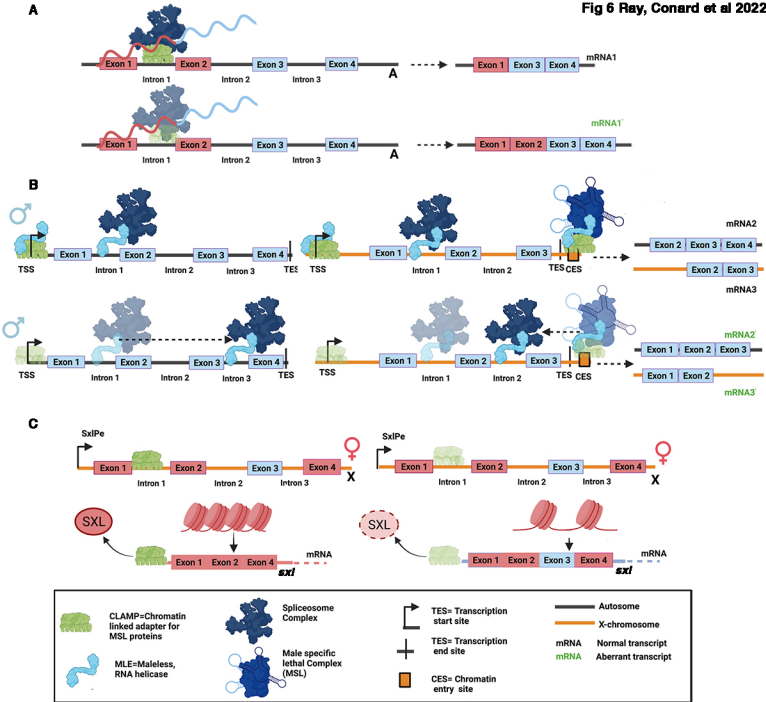

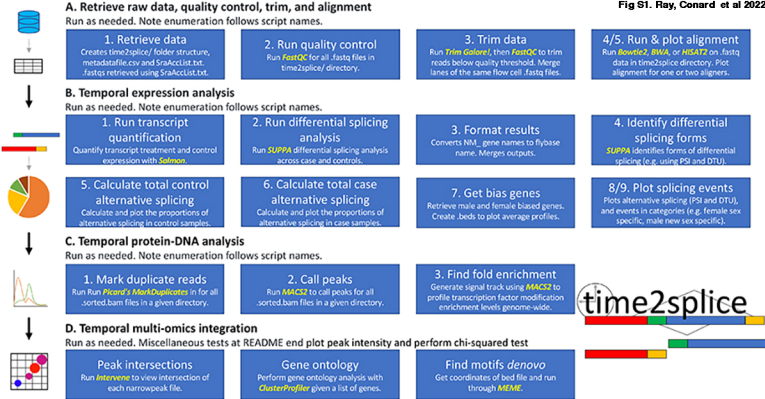

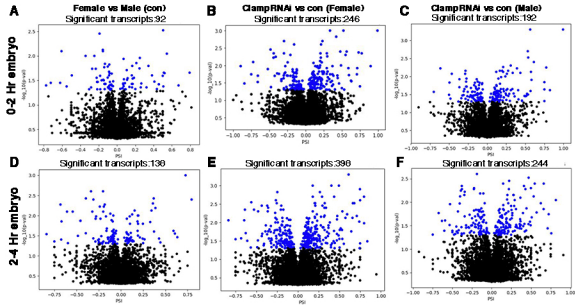

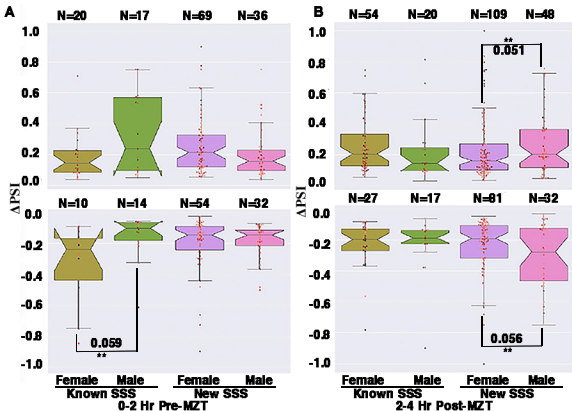

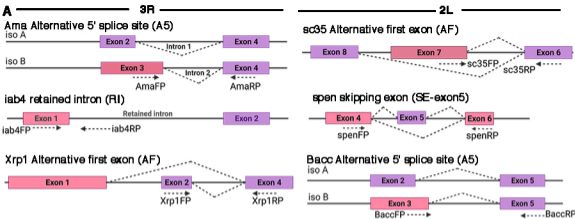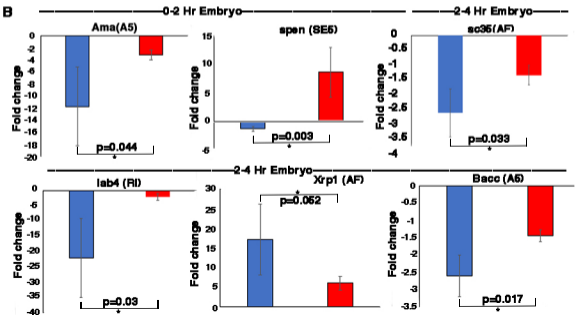

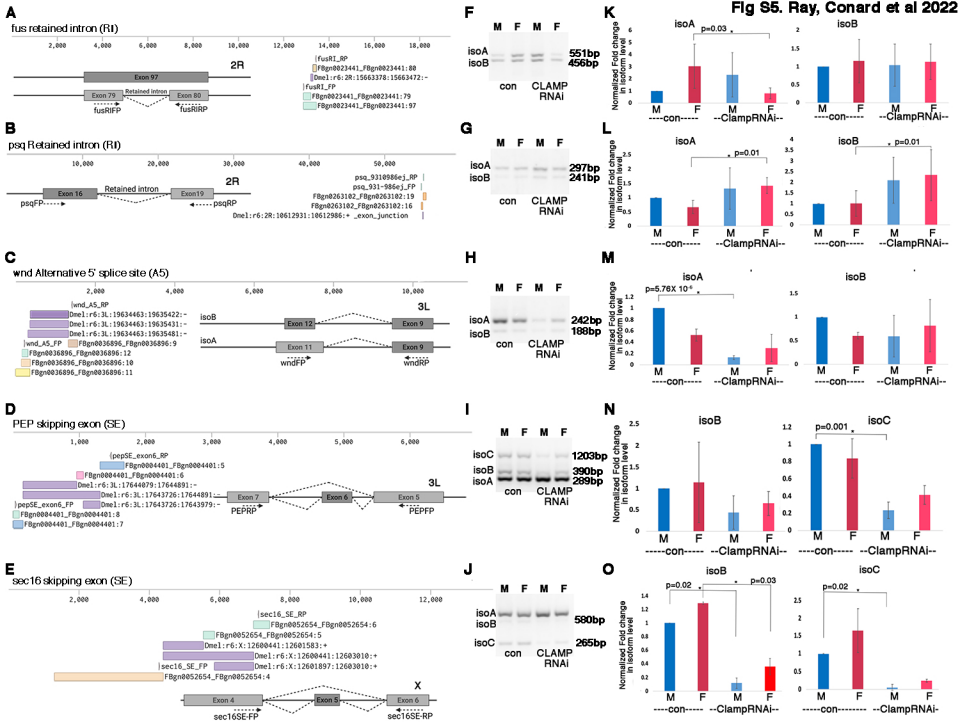



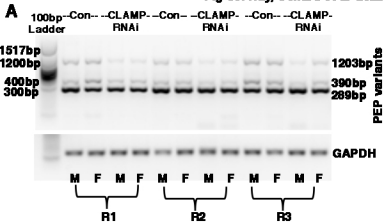

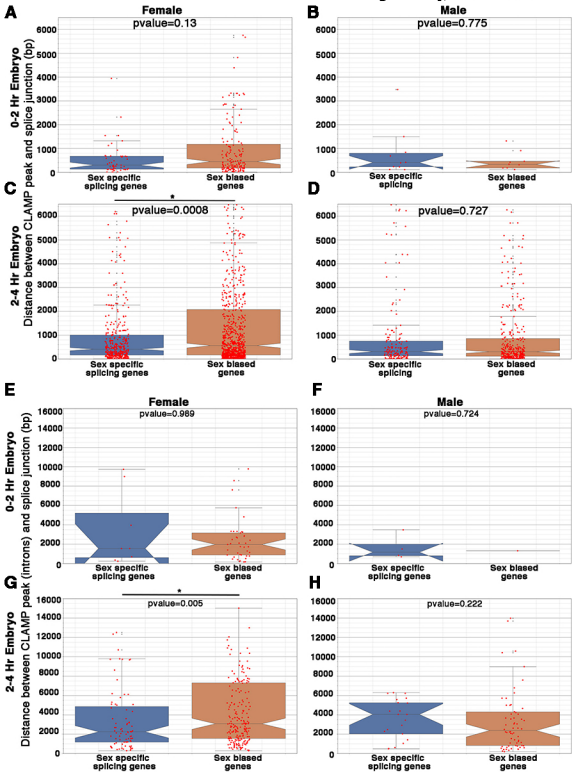

A

## CLAMP RNA target

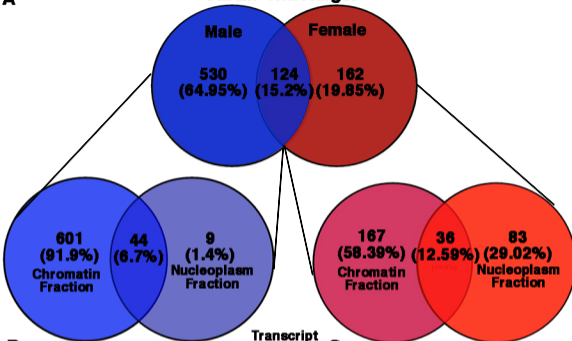

B

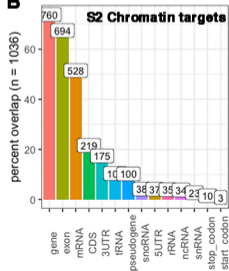

C

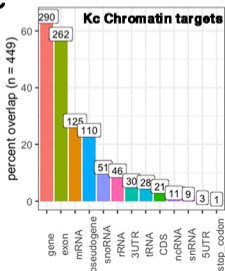

## X-chromosome

## Autosomes

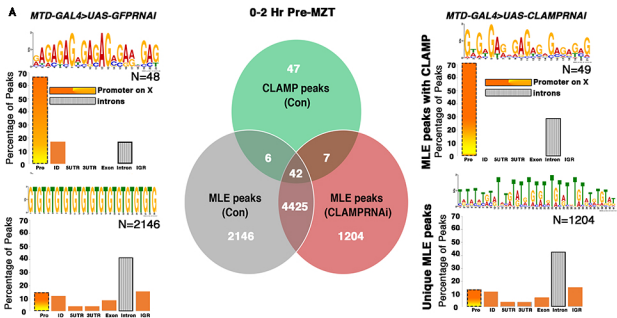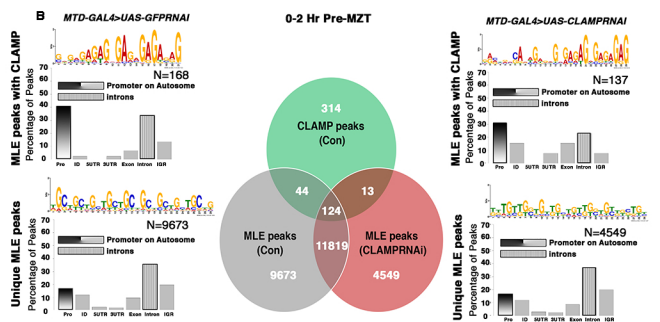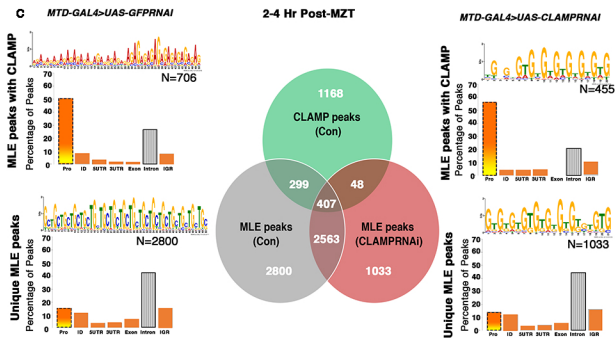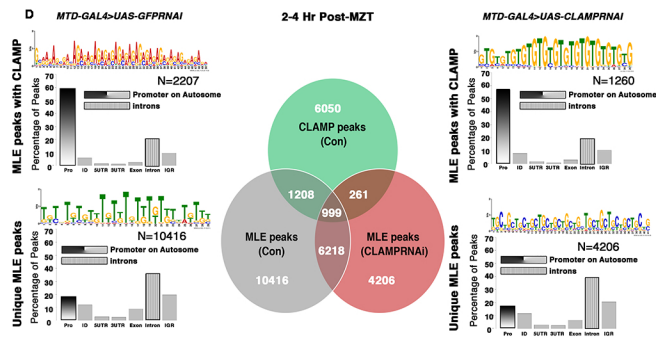

- █ CLAMP dependent male specific spliced genes
- █ CLAMP dependent female specific spliced genes
- █ Random actively expressing genes

**A** 0-2 Hr Pre-MZT**B** 2-4 Hr Post-MZT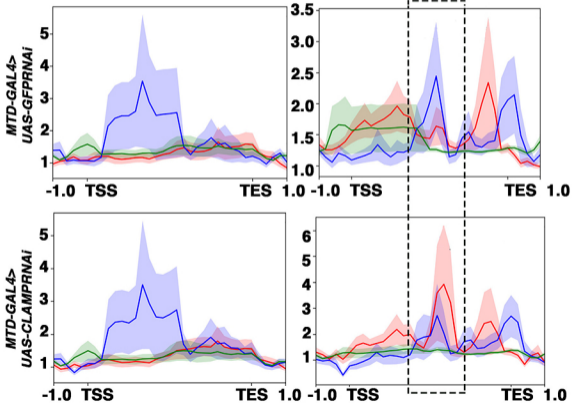

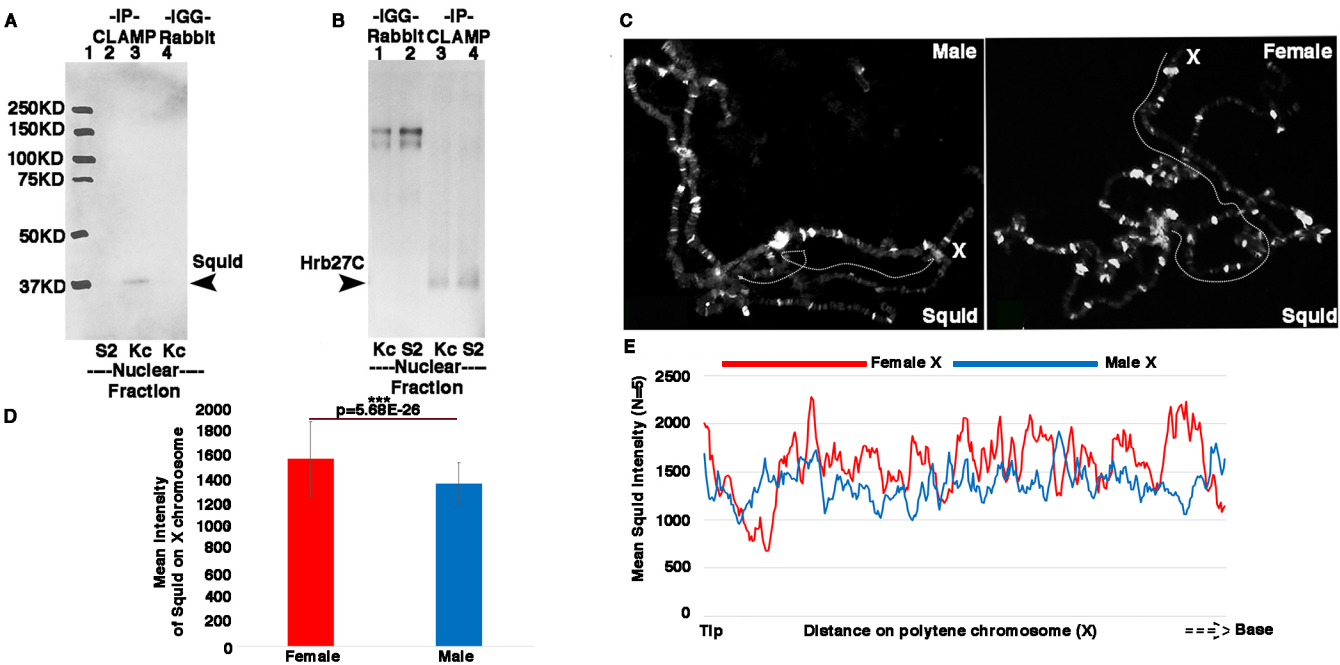

A

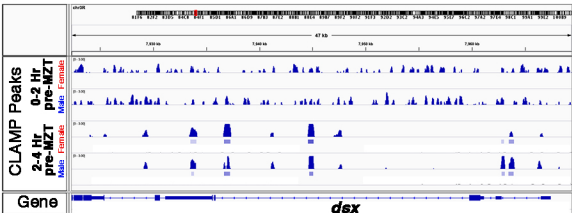

B

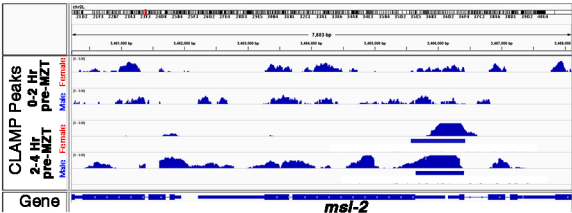

**A**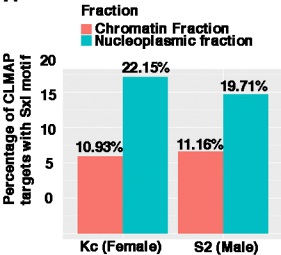**B**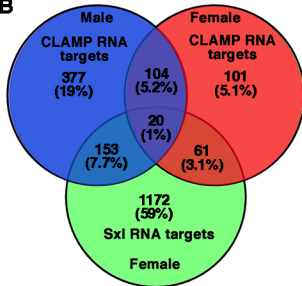**C**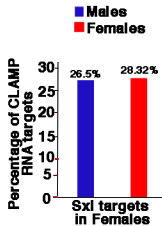

Source: https://www.biorxiv.org/content/10.1101/2021.03.18.436074v3.full.pdf
